# Supplementary material for: Tuning the steric hindrance of alkylamines: a predictive model of steric editing of planar amines
Source: Royal Society of Chemistry journal article supplement (doi:10.1039/d4sc03873h), 2024-01-01
Supplement: d4sc03873h1.pdf [file d4sc03873h1.pdf]

## Supporting Information

for

### **Tuning the Steric Hindrance of Alkylamines: A Predictive Model of Steric Editing of Planar Amines.**

Michele Tomasini,<sup>a,b,†</sup> Maria Voccia,<sup>a,b,†</sup> Lucia Caporaso,<sup>b</sup> Michal Szostak\*<sup>c</sup> and Albert Poater\*<sup>a</sup>

---

<sup>a</sup> Institut de Química Computacional i Catàlisi and Departament de Química, Universitat de Girona, c/ M<sup>re</sup> Aurèlia Capmany 69, 17003 Girona, Catalonia, Spain.

<sup>b</sup> Dipartimento di Chimica e Biologia, Università di Salerno, Via Ponte don Melillo, 84084, Fisciano, Italy.

<sup>c</sup> Department of Chemistry, Rutgers University, 73 Warren Street, Newark, New Jersey 07102, United States.

**Table 1.** Set of data.

| AMINE | G Kinetics | G Thermodynamics | G Au | G Pd | G PdCl2 |
|-------|------------|------------------|------|------|---------|
| 1     | 3.8        | 22.8             | 24.0 | 13.8 | 3.9     |
| 2     | -3.0       | 21.7             | 18.4 | 11.8 | -12.7   |
| 3     | -4.2       | 19.1             | 17.6 | 8.5  | -9.1    |
| 4     | -1.4       | 21.2             | 20.0 | 10.8 | -7.7    |
| 5     | -1.6       | 18.0             | 24.1 | 12.7 | -       |
| 6     | 4.5        | 22.2             | 33.6 | 17.2 | -       |
| 7     | 6.5        | 27.2             | 35.0 | 17.4 | -       |
| 8     | 16.8       | 29.3             | 45.9 | -    | -       |
| 9     | 6.8        | 27.5             | 35.8 | -    | -       |
| 10    | 10.8       | 25.3             | -    | -    | -       |
| 11    | 3.9        | 22.5             | 30.7 | 16.4 | 11.1    |
| 12    | -0.5       | 17.8             | 23.5 | 13.4 | -       |
| 13    | 4.3        | 24.1             | 33.3 | 21.1 | -       |
| 14    | 2.2        | 18.6             | 30.1 | 17.6 | -       |
| 15    | 1.3        | 13.9             | 27.2 | 15.1 | -       |
| 16    | -1.0       | 16.7             | 24.7 | 13.6 | -       |
| 17    | 4.5        | 18.1             | -    | 17.7 | -       |
| 18    | -2.6       | 20.0             | 18.7 | 11.1 | -5.8    |
| 19    | -8.6       | 14.5             | 20.7 | 10.8 | -       |
| 20    | -2.4       | 18.8             | 21.3 | 12.9 | -2.4    |
| 21    | 5.8        | 20.6             | 34.7 | 21.2 | 11.6    |
| 22    | -1.4       | 19.8             | 18.1 | 10.5 | -7.9    |
| 23    | -3.0       | 20.9             | 19.4 | 9.7  | -9.7    |
| 24    | -          | 35.1             | 31.8 | 15.3 | -       |
| 25    | -          | 36.2             | 27.2 | 13.1 | -0.1    |
| 26    | -          | 53.7             | 34.8 | 16.0 | -       |
| 27    | -          | 33.0             | 28.7 | 13.5 | -       |
| 28    | 2.1        | 14.6             | 27.0 | 14.1 | -       |
| 29    | 5.1        | 18.6             | 32.9 | 18.1 | -       |
| 30    | 4.0        | 17.5             | -    | -    | -       |
| 31    | 3.4        | 18.0             | 27.5 | -    | -       |
| 32    | 2.0        | 16.5             | -    | -    | -       |
| 33    | 4.2        | 19.4             | 32.2 | 19.5 | -       |
| 34    | 5.5        | 16.1             | 31.0 | -    | -       |
| 35    | 2.5        | 15.9             | 24.4 | 14.5 | 6.2     |
| 36    | 5.4        | 16.8             | -    | 17.3 | -       |

|                        |      |      |      |      |       |
|------------------------|------|------|------|------|-------|
| <b>37</b>              | 2.9  | 17.7 | 28.7 | 16.1 | -     |
| <b>38</b>              | 2.4  | 16.5 | 26.3 | -    | 8.0   |
| <b>39</b>              | 3.5  | 17.2 | 26.0 | 13.6 | 8.7   |
| <b>40</b>              | 1.9  | 17.4 | -    | -    | -     |
| <b>41</b>              | -    | 32.0 | 29.7 | -    | -     |
| <b>42</b>              | -0.1 | 15.2 | 25.4 | 13.3 | -     |
| <b>43</b>              | 5.1  | 19.6 | -    | 16.0 | -     |
| <b>NH<sub>3</sub></b>  | -    | -    | 20.7 | 11.0 | -11.4 |
| <b>NMe<sub>3</sub></b> | -2.4 | 22.9 | 21.5 | 12.3 | -7.0  |
| <b>NEt<sub>3</sub></b> | -1.6 | 19.8 | 21.0 | 11.2 | 0.4   |
| <b>Py</b>              | -0.9 | 28.4 | 21.3 | 10.2 | -8.5  |

| AMINE | pK <sub>a</sub> amine | %V <sub>Bur</sub> amine | High %V <sub>Bur</sub> amine | Low %V <sub>Bur</sub> amine |
|-------|-----------------------|-------------------------|------------------------------|-----------------------------|
| 1     | -8.3                  | 49.8                    | 56.6                         | 44.6                        |
| 2     | -7.8                  | 25.2                    | 31.2                         | 19.2                        |
| 3     | -6.5                  | 39.4                    | 47.2                         | 29.6                        |
| 4     | -7.5                  | 36.5                    | 44.8                         | 28.6                        |
| 5     | -5.9                  | 48.0                    | 53.7                         | 42.1                        |
| 6     | -8.0                  | 55.8                    | 59.9                         | 52.7                        |
| 7     | -10.4                 | 55.8                    | 59.4                         | 52.2                        |
| 8     | -11.4                 | 68.5                    | 74.9                         | 63.2                        |
| 9     | -10.6                 | 55.8                    | 59.6                         | 52.2                        |
| 10    | -9.5                  | 63.3                    | 82.3                         | 46.9                        |
| 11    | -8.1                  | 59.0                    | 67.5                         | 48.4                        |
| 12    | -5.8                  | 55.6                    | 73.2                         | 36.0                        |
| 13    | -8.9                  | 55.0                    | 59.2                         | 50.6                        |
| 14    | -6.2                  | 61.6                    | 67.5                         | 49.8                        |
| 15    | -3.9                  | 56.2                    | 58.5                         | 53.2                        |
| 16    | -5.3                  | 54.0                    | 57.9                         | 44.8                        |
| 17    | -6.0                  | 59.3                    | 64.2                         | 54.4                        |
| 18    | -6.9                  | 43.3                    | 43.8                         | 42.8                        |
| 19    | -4.2                  | 51.9                    | 53.0                         | 50.8                        |
| 20    | -6.3                  | 46.2                    | 46.8                         | 45.6                        |
| 21    | -7.2                  | 53.8                    | 60.0                         | 49.2                        |
| 22    | -6.8                  | 38.8                    | 49.8                         | 31.1                        |
| 23    | -7.3                  | 33.9                    | 35.0                         | 32.4                        |
| 24    | -14.3                 | 43.8                    | 46.0                         | 39.2                        |
| 25    | -14.8                 | 42.0                    | 44.8                         | 36.3                        |
| 26    | -23.4                 | 38.6                    | 56.7                         | 23.9                        |
| 27    | -13.3                 | 50.1                    | 62.3                         | 28.8                        |
| 28    | -4.3                  | 65.6                    | 79.6                         | 51.0                        |
| 29    | -6.2                  | 58.4                    | 62.6                         | 54.2                        |
| 30    | -5.7                  | 61.0                    | 66.4                         | 55.7                        |
| 31    | -5.9                  | 61.4                    | 74.9                         | 46.1                        |
| 32    | -5.2                  | 61.9                    | 68.2                         | 55.8                        |
| 33    | -6.6                  | 65.1                    | 71.5                         | 55.4                        |
| 34    | -5.0                  | 68.2                    | 75.7                         | 47.5                        |
| 35    | -4.9                  | 67.8                    | 84.9                         | 55.5                        |
| 36    | -5.4                  | 70.3                    | 88.0                         | 61.1                        |
| 37    | -5.8                  | 63.6                    | 77.3                         | 48.6                        |

|                        |       |      |      |      |
|------------------------|-------|------|------|------|
| <b>38</b>              | -5.2  | 67.4 | 85.0 | 52.3 |
| <b>39</b>              | -5.6  | 67.9 | 86.3 | 52.1 |
| <b>40</b>              | -5.6  | 61.3 | 67.1 | 53.9 |
| <b>41</b>              | -12.8 | 54.5 | 79.1 | 40.4 |
| <b>42</b>              | -4.5  | 61.6 | 73.8 | 50.8 |
| <b>43</b>              | -6.7  | 63.1 | 72.2 | 53.8 |
| <b>NH<sub>3</sub></b>  | -12.5 | 15.2 | 15.7 | 14.8 |
| <b>NMe<sub>3</sub></b> | -8.3  | 29.7 | 31.3 | 28.6 |
| <b>NEt<sub>3</sub></b> | -6.8  | 44.8 | 50.1 | 40.2 |
| <b>Py</b>              | -11.0 | 21.3 | 21.3 | 21.3 |

| AMINE | HOMO amine | LUMO amine | $\eta$ amine | Tanimoto Index | Longest C-N bond |
|-------|------------|------------|--------------|----------------|------------------|
| 1     | -0.20190   | 0.02978    | 6.3          | 1.000          | 1.473            |
| 2     | -0.21454   | 0.02954    | 6.6          | 0.255          | 1.467            |
| 3     | -0.22156   | 0.02449    | 6.7          | 0.176          | 1.484            |
| 4     | -0.22222   | 0.03166    | 6.9          | 0.165          | 1.462            |
| 5     | -0.20540   | 0.02926    | 6.4          | 0.224          | 1.493            |
| 6     | -0.21000   | -0.01640   | 5.3          | 0.114          | 1.506            |
| 7     | -0.21397   | -0.05841   | 4.2          | 0.076          | 1.508            |
| 8     | -0.21530   | -0.05113   | 4.5          | 0.072          | 1.510            |
| 9     | -0.21374   | -0.05165   | 4.4          | 0.093          | 1.509            |
| 10    | -0.20546   | -0.02491   | 4.9          | 0.090          | 1.475            |
| 11    | -0.21228   | -0.01871   | 5.3          | 0.046          | 1.482            |
| 12    | -0.21936   | 0.03587    | 6.9          | 0.552          | 1.521            |
| 13    | -0.19478   | 0.02694    | 6.0          | 0.725          | 1.484            |
| 14    | -0.18934   | 0.02537    | 5.8          | 0.725          | 1.504            |
| 15    | -0.21378   | 0.03960    | 6.9          | 0.725          | 1.525            |
| 16    | -0.21166   | 0.02695    | 6.5          | 0.253          | 1.510            |
| 17    | -0.21229   | 0.02870    | 6.6          | 0.250          | 1.501            |
| 18    | -0.22538   | 0.03197    | 7.0          | 0.418          | 1.478            |
| 19    | -0.18481   | 0.02410    | 5.7          | 0.033          | 1.525            |
| 20    | -0.21949   | 0.02990    | 6.8          | 0.247          | 1.493            |
| 21    | -0.21158   | 0.04245    | 6.9          | 1.000          | 1.463            |
| 22    | -0.21802   | 0.02541    | 6.6          | 0.447          | 1.486            |
| 23    | -0.22548   | 0.02944    | 6.9          | 0.568          | 1.469            |
| 24    | -0.21937   | -0.02142   | 5.4          | 0.288          | 1.502            |
| 25    | -0.22994   | -0.00466   | 6.1          | 0.368          | 1.482            |
| 26    | -0.25356   | -0.05273   | 5.5          | 0.183          | 1.521            |
| 27    | -0.22911   | -0.03047   | 5.4          | 0.288          | 1.519            |
| 28    | -0.20360   | 0.01874    | 6.1          | 0.157          | 1.518            |
| 29    | -0.19224   | -0.00302   | 5.1          | 0.247          | 1.493            |
| 30    | -0.17896   | -0.00403   | 4.8          | 0.118          | 1.506            |
| 31    | -0.18103   | -0.00990   | 4.7          | 0.056          | 1.509            |
| 32    | -0.20301   | -0.01523   | 5.1          | 0.048          | 1.523            |
| 33    | -0.19311   | 0.02977    | 6.1          | 0.416          | 1.510            |
| 34    | -0.19266   | 0.03086    | 6.1          | 0.389          | 1.520            |
| 35    | -0.18854   | 0.02639    | 5.8          | 0.252          | 1.523            |
| 36    | -0.18587   | 0.02683    | 5.8          | 0.252          | 1.511            |
| 37    | -0.15105   | 0.02364    | 4.8          | 0.174          | 1.486            |

|                        |          |          |     |       |       |
|------------------------|----------|----------|-----|-------|-------|
| <b>38</b>              | -0.19014 | 0.01569  | 5.6 | 0.172 | 1.490 |
| <b>39</b>              | -0.18702 | 0.01428  | 5.5 | 0.172 | 1.490 |
| <b>40</b>              | -0.10848 | 0.00420  | 3.1 | 0.172 | 1.480 |
| <b>41</b>              | -0.22783 | -0.03009 | 5.4 | 0.085 | 1.512 |
| <b>42</b>              | -0.20252 | 0.01977  | 6.0 | 0.172 | 1.524 |
| <b>43</b>              | -0.20656 | -0.01116 | 5.3 | 0.133 | 1.516 |
| <b>NH<sub>3</sub></b>  | -0.27751 | 0.02893  | 8.3 | 0.000 | 0.000 |
| <b>NMe<sub>3</sub></b> | -0.21548 | 0.03482  | 6.8 | 0.162 | 1.455 |
| <b>NEt<sub>3</sub></b> | -0.20994 | 0.03704  | 6.7 | 0.541 | 1.466 |
| <b>Py</b>              | -0.27157 | -0.04185 | 6.3 | 0.000 | 1.336 |

| AMINE | Molecular Area | Pyramidalization | %V <sub>Bur</sub> ammonium | High %V <sub>Bur</sub> ammonium | Low %V <sub>Bur</sub> ammonium |
|-------|----------------|------------------|----------------------------|---------------------------------|--------------------------------|
| 1     | 47.9           | 0.529            | 48.2                       | 59.1                            | 36.4                           |
| 2     | 35.0           | 0.755            | 25.6                       | 30.9                            | 20.3                           |
| 3     | 48.7           | 0.704            | 42.5                       | 49.9                            | 34.9                           |
| 4     | 39.9           | 0.707            | 36.8                       | 44.1                            | 29.8                           |
| 5     | 52.4           | 0.535            | 47.5                       | 52.7                            | 42.3                           |
| 6     | 59.8           | 0.382            | 54.0                       | 59.1                            | 49.3                           |
| 7     | 59.9           | 0.382            | 54.0                       | 59.5                            | 48.8                           |
| 8     | 61.2           | 0.353            | 65.9                       | 78.2                            | 53.4                           |
| 9     | 65.0           | 0.383            | 53.9                       | 58.9                            | 49.2                           |
| 10    | 82.1           | 0.358            | 63.5                       | 71.9                            | 48.5                           |
| 11    | 82.1           | 0.567            | 59.6                       | 78.5                            | 45.3                           |
| 12    | 57.4           | 0.579            | 52.5                       | 55.1                            | 50.0                           |
| 13    | 52.9           | 0.381            | 51.0                       | 62.3                            | 38.8                           |
| 14    | 56.6           | 0.129            | 52.4                       | 61.1                            | 43.1                           |
| 15    | 60.1           | 0.403            | 54.8                       | 57.1                            | 51.8                           |
| 16    | 57.1           | 0.527            | 52.8                       | 58.8                            | 47.8                           |
| 17    | 58.1           | 0.266            | 56.0                       | 60.2                            | 50.7                           |
| 18    | 49.3           | 0.703            | 43.7                       | 44.9                            | 42.5                           |
| 19    | 60.5           | 0.574            | 51.9                       | 52.6                            | 51.2                           |
| 20    | 50.4           | 0.632            | 45.9                       | 47.3                            | 45.2                           |
| 21    | 48.4           | 0.359            | 51.1                       | 57.0                            | 46.5                           |
| 22    | 45.6           | 0.681            | 39.9                       | 53.3                            | 20.4                           |
| 23    | 43.9           | 0.693            | 37.9                       | 48.6                            | 21.5                           |
| 24    | 48.3           | 0.609            | 45.8                       | 52.2                            | 41.5                           |
| 25    | 45.9           | 0.621            | 42.3                       | 56.4                            | 30.1                           |
| 26    | 36.7           | 0.760            | 38.3                       | 49.7                            | 30.0                           |
| 27    | 49.4           | 0.615            | 47.4                       | 53.6                            | 39.0                           |
| 28    | 71.3           | 0.582            | 62.1                       | 70.3                            | 53.9                           |
| 29    | 58.8           | 0.273            | 54.8                       | 55.8                            | 53.8                           |
| 30    | 64.1           | 0.581            | 61.6                       | 69.8                            | 53.4                           |
| 31    | 88.1           | 0.584            | 61.6                       | 69.8                            | 53.3                           |
| 32    | 100.0          | 0.559            | 62.2                       | 70.5                            | 53.4                           |
| 33    | 57.2           | 0.162            | 60.4                       | 79.4                            | 42.9                           |
| 34    | 61.8           | 0.336            | 64.1                       | 70.2                            | 57.5                           |
| 35    | 68.1           | 0.538            | 66.1                       | 90.5                            | 55.1                           |
| 36    | 68.4           | 0.294            | 65.3                       | 87.8                            | 56.4                           |
| 37    | 65.9           | 0.560            | 61.1                       | 72.5                            | 50.1                           |



|                        |      |       |      |      |      |
|------------------------|------|-------|------|------|------|
| <b>38</b>              | 86.6 | 0.408 | 63.4 | 67.9 | 54.6 |
| <b>39</b>              | 96.9 | 0.395 | 63.4 | 67.8 | 54.7 |
| <b>40</b>              | 76.6 | 0.512 | 59.8 | 67.1 | 48.2 |
| <b>41</b>              | 64.1 | 0.684 | 52.4 | 65.9 | 36.1 |
| <b>42</b>              | 69.1 | 0.589 | 60.4 | 75.2 | 44.5 |
| <b>43</b>              | 69.9 | 0.604 | 62.1 | 76.0 | 51.5 |
| <b>NH<sub>3</sub></b>  | 12.9 | 0.841 | 16.3 | 16.8 | 15.8 |
| <b>NMe<sub>3</sub></b> | 29.2 | 0.712 | 30.6 | 31.7 | 29.6 |
| <b>NEt<sub>3</sub></b> | 44.2 | 0.696 | 45.0 | 50.0 | 40.4 |
| <b>Py</b>              | 35.5 | 0.000 | 22.8 | 22.8 | 22.8 |

| AMINE | N-NPA amine | N-NPA ammonium | MBO (N-H) | d(N-H) | MBO (Au-N) | d(Au-N) |
|-------|-------------|----------------|-----------|--------|------------|---------|
| 1     | -0.450      | -0.341         | 0.892     | 1.021  | 0.580      | 2.187   |
| 2     | -0.661      | -0.496         | 0.883     | 1.021  | 0.535      | 2.114   |
| 3     | -0.647      | -0.510         | 0.885     | 1.022  | 0.556      | 2.151   |
| 4     | -0.426      | -0.319         | 0.881     | 1.023  | 0.574      | 2.147   |
| 5     | -0.473      | -0.376         | 0.888     | 1.022  | 0.600      | 2.215   |
| 6     | -0.525      | -0.451         | 0.889     | 1.020  | 0.561      | 2.277   |
| 7     | -0.521      | -0.410         | 0.885     | 1.020  | 0.558      | 2.281   |
| 8     | -0.520      | -0.429         | 0.870     | 1.022  | 0.600      | 2.268   |
| 9     | -0.524      | -0.413         | 0.886     | 1.020  | 0.556      | 2.282   |
| 10    | -0.445      | -0.374         | 0.886     | 1.023  | -          | -       |
| 11    | -0.470      | -0.388         | 0.883     | 1.020  | 0.542      | 2.210   |
| 12    | -0.473      | -0.383         | 0.882     | 1.020  | 0.622      | 2.205   |
| 13    | -0.470      | -0.367         | 0.893     | 1.020  | 0.627      | 2.221   |
| 14    | -0.487      | -0.405         | 0.893     | 1.020  | 0.638      | 2.224   |
| 15    | -0.519      | -0.409         | 0.894     | 1.018  | 0.666      | 2.219   |
| 16    | -0.461      | -0.368         | 0.886     | 1.021  | 0.596      | 2.210   |
| 17    | -0.486      | -0.405         | 0.893     | 1.019  | -          | -       |
| 18    | -0.432      | -0.333         | 0.881     | 1.024  | 0.596      | 2.158   |
| 19    | -0.456      | -0.397         | 0.887     | 1.020  | 0.638      | 2.202   |
| 20    | -0.453      | -0.354         | 0.886     | 1.023  | 0.593      | 2.179   |
| 21    | -0.442      | -0.367         | 0.897     | 1.019  | 0.538      | 2.247   |
| 22    | -0.656      | -0.504         | 0.889     | 1.021  | 0.565      | 2.149   |
| 23    | -0.628      | -0.487         | 0.888     | 1.023  | 0.557      | 2.144   |
| 24    | -0.436      | -0.347         | 0.882     | 1.023  | 0.479      | 2.212   |
| 25    | -0.413      | -0.330         | 0.879     | 1.022  | 0.509      | 2.171   |
| 26    | -0.443      | -0.389         | 0.857     | 1.026  | 0.412      | 2.185   |
| 27    | -0.407      | -0.367         | 0.880     | 1.023  | 0.522      | 2.209   |
| 28    | -0.472      | -0.405         | 0.889     | 1.020  | 0.591      | 2.210   |
| 29    | -0.490      | -0.398         | 0.895     | 1.020  | 0.601      | 2.268   |
| 30    | -0.476      | -0.394         | 0.890     | 1.020  | -          | -       |
| 31    | -0.472      | -0.391         | 0.890     | 1.020  | 0.593      | 2.208   |
| 32    | -0.467      | -0.397         | 0.891     | 1.019  | -          | -       |
| 33    | -0.506      | -0.401         | 0.899     | 1.019  | 0.643      | 2.229   |
| 34    | -0.752      | -0.422         | 0.904     | 1.018  | 0.627      | 2.238   |
| 35    | -0.502      | -0.393         | 0.888     | 1.018  | 0.624      | 2.194   |
| 36    | -0.509      | -0.409         | 0.896     | 1.018  | -          | -       |
| 37    | -0.454      | -0.372         | 0.892     | 1.019  | 0.579      | 2.198   |

|                        |        |        |       |       |       |       |
|------------------------|--------|--------|-------|-------|-------|-------|
| <b>38</b>              | -0.473 | -0.383 | 0.885 | 1.019 | 0.582 | 2.194 |
| <b>39</b>              | -0.487 | -0.384 | 0.882 | 1.020 | 0.603 | 2.194 |
| <b>40</b>              | -0.368 | -0.365 | 0.889 | 1.021 | -     | -     |
| <b>41</b>              | -0.404 | -0.379 | 0.876 | 1.022 | 0.488 | 2.202 |
| <b>42</b>              | -0.473 | -0.409 | 0.890 | 1.019 | 0.597 | 2.198 |
| <b>43</b>              | -0.510 | -0.446 | 0.882 | 1.020 | -     | -     |
| <b>NH<sub>3</sub></b>  | -1.069 | -0.885 | 0.878 | 1.021 | 0.515 | 2.103 |
| <b>NMe<sub>3</sub></b> | -0.418 | -0.339 | 0.881 | 1.021 | 0.553 | 2.135 |
| <b>NEt<sub>3</sub></b> | -0.442 | -0.325 | 0.891 | 1.022 | 0.588 | 2.152 |
| <b>Py</b>              | -0.444 | -0.394 | 0.887 | 1.014 | -     | -     |

| AMINE | Pyramidalization Au | MBO (Pd-N) | d(Pd-N) | Pyramidalization Pd |
|-------|---------------------|------------|---------|---------------------|
| 1     | 0.764               | 0.387      | 2.364   | 0.734               |
| 2     | 0.797               | 0.377      | 2.214   | 0.790               |
| 3     | 0.781               | 0.395      | 2.277   | 0.764               |
| 4     | 0.784               | 0.402      | 2.272   | 0.773               |
| 5     | 0.683               | 0.395      | 2.395   | 0.645               |
| 6     | 0.645               | 0.310      | 2.570   | 0.572               |
| 7     | 0.647               | 0.302      | 2.577   | 0.570               |
| 8     | 0.665               | -          | -       | -                   |
| 9     | 0.647               | -          | -       | -                   |
| 10    | -                   | -          | -       | -                   |
| 11    | 0.755               | 0.262      | 2.467   | 0.715               |
| 12    | 0.722               | 0.411      | 2.407   | 0.689               |
| 13    | 0.611               | 0.386      | 2.424   | 0.558               |
| 14    | 0.624               | 0.399      | 2.452   | 0.569               |
| 15    | 0.634               | 0.427      | 2.490   | 0.576               |
| 16    | 0.728               | 0.381      | 2.428   | 0.685               |
| 17    | -                   | 0.353      | 2.576   | 0.542               |
| 18    | 0.790               | 0.421      | 2.301   | 0.777               |
| 19    | 0.707               | 0.431      | 2.386   | 0.680               |
| 20    | 0.751               | 0.406      | 2.343   | 0.726               |
| 21    | 0.661               | 0.271      | 2.562   | 0.588               |
| 22    | 0.779               | 0.404      | 2.275   | 0.758               |
| 23    | 0.780               | 0.393      | 2.268   | 0.764               |
| 24    | 0.739               | 0.300      | 2.387   | 0.692               |
| 25    | 0.783               | 0.327      | 2.311   | 0.789               |
| 26    | 0.795               | 0.245      | 2.303   | 0.794               |
| 27    | 0.709               | 0.318      | 2.386   | 0.687               |
| 28    | 0.755               | 0.321      | 2.483   | 0.711               |
| 29    | 0.617               | 0.353      | 2.574   | 0.537               |
| 30    | -                   | -          | -       | -                   |
| 31    | 0.752               | -          | -       | -                   |
| 32    | -                   | -          | -       | -                   |
| 33    | 0.625               | 0.394      | 2.454   | 0.577               |
| 34    | 0.629               | -          | -       | -                   |
| 35    | 0.701               | 0.397      | 2.383   | 0.669               |
| 36    | -                   | 0.351      | 2.490   | 0.574               |
| 37    | 0.617               | 0.311      | 2.448   | 0.537               |

|                        |       |       |       |       |
|------------------------|-------|-------|-------|-------|
| <b>38</b>              | 0.716 |       |       |       |
| <b>39</b>              | 0.713 | 0.316 | 2.439 | 0.676 |
| <b>40</b>              | -     | -     | -     | -     |
| <b>41</b>              | 0.770 | -     | -     | -     |
| <b>42</b>              | 0.744 | 0.331 | 2.444 | 0.705 |
| <b>43</b>              | -     | 0.306 | 2.502 | 0.720 |
| <b>NH<sub>3</sub></b>  | 0.819 | 0.376 | 2.187 | 0.826 |
| <b>NMe<sub>3</sub></b> | 0.780 | 0.399 | 2.247 | 0.770 |
| <b>NEt<sub>3</sub></b> | 0.785 | 0.421 | 2.287 | 0.774 |
| <b>Py</b>              | -     | -     | -     | -     |

| AMINE | G      | MBO (Pd-N) | d(Pd-N) | Pyramidalization PdCl2 |
|-------|--------|------------|---------|------------------------|
| 1     | 3.9    | 0.357      | 2.367   | 0.764                  |
| 2     | -12.7  | 0.377      | 2.182   | 0.769                  |
| 3     | -9.1   | 0.389      | 2.269   | 0.785                  |
| 4     | -7.7   | 0.369      | 2.301   | 0.786                  |
| 5     | -      | -          | -       | -                      |
| 6     | -      | -          | -       | -                      |
| 7     | -      | -          | -       | -                      |
| 8     | -      | -          | -       | -                      |
| 9     | -      | -          | -       | -                      |
| 10    | -      | -          | -       | -                      |
| 11    | 11.145 | 0.317      | 2.397   | 0.776                  |
| 12    | -      | -          | -       | -                      |
| 13    | -      | -          | -       | -                      |
| 14    | -      | -          | -       | -                      |
| 15    | -      | -          | -       | -                      |
| 16    | -      | -          | -       | -                      |
| 17    | -      | -          | -       | -                      |
| 18    | -5.773 | 0.390      | 2.332   | 0.804                  |
| 19    | -      | -          | -       | -                      |
| 20    | -2.443 | 0.378      | 2.378   | 0.763                  |
| 21    | 11.631 | 0.352      | 2.467   | 0.675                  |
| 22    | -7.895 | 0.390      | 2.268   | 0.779                  |
| 23    | -9.736 | 0.391      | 2.239   | 0.765                  |
| 24    | -      | -          | -       | -                      |
| 25    | -0.094 | 0.284      | 2.411   | 0.789                  |
| 26    | -      | -          | -       | -                      |
| 27    | -      | -          | -       | -                      |
| 28    | -      | -          | -       | -                      |
| 29    | -      | -          | -       | -                      |
| 30    | -      | -          | -       | -                      |
| 31    | -      | -          | -       | -                      |
| 32    | -      | -          | -       | -                      |
| 33    | -      | -          | -       | -                      |
| 34    | -      | -          | -       | -                      |
| 35    | 6.244  | 0.335      | 2.578   | 0.709                  |
| 36    | -      | -          | -       | -                      |
| 37    | -      | -          | -       | -                      |

|                        |         |       |       |       |
|------------------------|---------|-------|-------|-------|
| <b>38</b>              | 8.043   | 0.339 | 2.486 | 0.708 |
| <b>39</b>              | 8.691   | 0.350 | 2.470 | 0.714 |
| <b>40</b>              | -       | -     | -     | -     |
| <b>41</b>              | -       | -     | -     | -     |
| <b>42</b>              | -       | -     | -     | -     |
| <b>43</b>              | -       | -     | -     | -     |
| <b>NH<sub>3</sub></b>  | -11.445 | 0.360 | 2.168 | 0.798 |
| <b>NMe<sub>3</sub></b> | -6.987  | 0.362 | 2.279 | 0.783 |
| <b>NEt<sub>3</sub></b> | 0.360   | 0.374 | 2.344 | 0.800 |
| <b>Py</b>              | -       | -     | -     | -     |

**Table 2.** xyz coordinates and absolute energies (in a.u.) of all computed amines.

28

1 SCF Done: -371.207506737 A.U.

|   |           |           |           |
|---|-----------|-----------|-----------|
| N | 0.000425  | 0.266350  | 0.184125  |
| C | -0.301214 | 1.461063  | -0.597570 |
| C | 0.266486  | 2.739159  | 0.017529  |
| H | -1.384643 | 1.569313  | -0.650681 |
| H | 0.043151  | 1.372433  | -1.640939 |
| H | -0.007145 | 3.605866  | -0.589339 |
| H | -0.127579 | 2.880926  | 1.025483  |
| H | 1.355520  | 2.714962  | 0.082610  |
| C | 1.389521  | -0.201154 | 0.064457  |
| C | 1.689191  | -1.073421 | -1.166578 |
| H | 1.991680  | 0.704197  | -0.036919 |
| H | 2.763154  | -1.255874 | -1.246413 |
| H | 1.193182  | -2.043644 | -1.096521 |
| H | 1.363425  | -0.587205 | -2.087648 |
| C | -1.047263 | -0.768285 | 0.199211  |
| C | -2.135465 | -0.403266 | 1.213987  |
| H | -0.568347 | -1.680421 | 0.559356  |
| H | -2.895328 | -1.186576 | 1.270073  |
| H | -1.700866 | -0.265277 | 2.204590  |
| H | -2.638112 | 0.525450  | 0.932542  |
| C | -1.679484 | -1.101708 | -1.164901 |
| H | -2.344005 | -1.962706 | -1.063883 |
| H | -2.278446 | -0.270704 | -1.542552 |
| H | -0.927443 | -1.342888 | -1.914429 |
| C | 1.855829  | -0.892152 | 1.348438  |
| H | 1.695689  | -0.242637 | 2.209944  |
| H | 1.318412  | -1.826955 | 1.522539  |
| H | 2.919112  | -1.134126 | 1.285871  |

17

2 SCF Done: -252.01589795 A.U.

|   |           |           |           |
|---|-----------|-----------|-----------|
| N | 0.000174  | -1.467198 | -0.179517 |
| C | 1.260072  | 0.708591  | -0.230068 |
| C | 1.216805  | -0.754695 | 0.225943  |
| C | -1.216625 | -0.754986 | 0.225917  |
| C | -1.260244 | 0.708317  | -0.230048 |
| H | 2.081690  | -1.303112 | -0.154087 |
| H | 1.328786  | 0.738261  | -1.323681 |
| H | 2.158544  | 1.195850  | 0.160016  |
| H | -0.000161 | 1.524617  | 1.316461  |
| H | -0.000278 | 2.476893  | -0.159395 |
| H | -2.081376 | -1.303579 | -0.154165 |
| H | -1.271562 | -0.791758 | 1.320216  |
| H | -1.329024 | 0.738026  | -1.323653 |
| H | -2.158809 | 1.195331  | 0.160126  |
| H | 1.271689  | -0.791440 | 1.320246  |
| C | -0.000163 | 1.452884  | 0.222362  |
| H | 0.000207  | -1.569364 | -1.190099 |

29

3 SCF Done: -409.3454034 A.U.



|   |           |           |           |
|---|-----------|-----------|-----------|
| N | -0.000034 | -0.944342 | -0.332342 |
| C | 1.253926  | 1.223722  | -0.454901 |
| C | 1.284764  | -0.262686 | -0.036578 |
| C | -1.284793 | -0.262654 | -0.036558 |
| C | -1.253831 | 1.223742  | -0.454894 |
| H | 1.278012  | 1.273243  | -1.549460 |
| H | 2.156850  | 1.725180  | -0.095029 |
| H | 0.000082  | 2.013888  | 1.126166  |
| H | 0.000096  | 2.977616  | -0.331023 |
| H | -1.277844 | 1.273175  | -1.549459 |
| H | -2.156745 | 1.725300  | -0.095137 |
| C | 0.000059  | 1.947750  | 0.034722  |
| H | 0.000015  | -1.159315 | -1.323176 |
| C | -1.647855 | -0.398693 | 1.451127  |
| H | -2.676923 | -0.071017 | 1.612884  |
| H | -1.560987 | -1.440274 | 1.763298  |
| H | -1.010844 | 0.200989  | 2.097144  |
| C | -2.357173 | -0.996275 | -0.849710 |
| H | -2.139244 | -0.947051 | -1.920042 |
| H | -2.409021 | -2.047164 | -0.557868 |
| H | -3.337026 | -0.543953 | -0.687305 |
| C | 2.357057  | -0.996381 | -0.849705 |
| H | 2.409211  | -2.047165 | -0.557558 |
| H | 2.138841  | -0.947528 | -1.920000 |
| H | 3.336849  | -0.543769 | -0.687702 |
| C | 1.647856  | -0.398753 | 1.451075  |
| H | 1.011271  | 0.201436  | 2.097077  |
| H | 1.560478  | -1.440243 | 1.763411  |
| H | 2.677107  | -0.071579 | 1.612704  |

20

4 SCF Done: -291.341804617 A.U.

|   |           |           |           |
|---|-----------|-----------|-----------|
| N | 0.971669  | -0.000002 | -0.316048 |
| C | -1.890448 | 0.000005  | 0.249710  |
| C | -1.154923 | 1.253397  | -0.226733 |
| C | 0.315255  | 1.208228  | 0.180614  |
| C | 0.315256  | -1.208237 | 0.180608  |
| C | -1.154928 | -1.253393 | -0.226726 |
| H | 0.845012  | 2.075845  | -0.219810 |
| H | -1.217451 | 1.322517  | -1.317140 |
| H | -1.617341 | 2.154651  | 0.183573  |
| H | -1.931064 | 0.000009  | 1.344938  |
| H | -2.923449 | 0.000001  | -0.106354 |
| H | 0.845000  | -2.075853 | -0.219835 |
| H | 0.389280  | -1.267240 | 1.284328  |
| H | -1.217464 | -1.322520 | -1.317130 |
| H | -1.617354 | -2.154641 | 0.183588  |
| H | 0.389274  | 1.267220  | 1.284336  |
| C | 2.391487  | 0.000003  | -0.006828 |
| H | 2.866268  | -0.884396 | -0.435983 |
| H | 2.866263  | 0.884412  | -0.435965 |
| H | 2.591146  | -0.000008 | 1.079930  |

32

5 SCF Done: -448.658629708 A.U.

|   |           |           |           |
|---|-----------|-----------|-----------|
| N | 0.000000  | -0.718132 | -0.377329 |
| C | -0.000001 | 2.164488  | -0.004008 |
| C | 1.236665  | 1.422634  | -0.485838 |
| C | 1.288426  | -0.047868 | -0.031778 |
| C | -1.288426 | -0.047869 | -0.031778 |
| C | -1.236666 | 1.422633  | -0.485837 |
| H | 1.250448  | 1.441615  | -1.580522 |
| H | 2.148435  | 1.920274  | -0.146202 |
| H | -0.000001 | 2.250525  | 1.085765  |
| H | -0.000001 | 3.186658  | -0.391420 |
| H | -1.250449 | 1.441615  | -1.580522 |
| H | -2.148436 | 1.920273  | -0.146201 |
| C | 0.000001  | -2.151246 | -0.110747 |
| H | -0.871176 | -2.619240 | -0.562165 |
| H | 0.871175  | -2.619240 | -0.562172 |
| H | 0.000006  | -2.416969 | 0.956710  |
| C | 2.426196  | -0.712878 | -0.831542 |
| H | 2.133085  | -0.839702 | -1.874805 |
| H | 3.312504  | -0.076862 | -0.795861 |
| H | 2.712539  | -1.684413 | -0.428692 |
| C | 1.669635  | -0.121041 | 1.465527  |
| H | 2.690512  | 0.241686  | 1.603444  |
| H | 1.018869  | 0.482748  | 2.093741  |
| H | 1.633965  | -1.147539 | 1.832234  |
| C | -2.426196 | -0.712878 | -0.831542 |
| H | -3.312502 | -0.076857 | -0.795867 |
| H | -2.133083 | -0.839709 | -1.874803 |
| H | -2.712546 | -1.684409 | -0.428688 |
| C | -1.669634 | -0.121044 | 1.465527  |
| H | -1.018866 | 0.482742  | 2.093742  |
| H | -2.690510 | 0.241687  | 1.603446  |
| H | -1.633967 | -1.147543 | 1.832232  |

38

6 SCF Done: -602.339222173 A.U.

|   |           |           |           |
|---|-----------|-----------|-----------|
| N | -0.546050 | -0.000822 | -0.273317 |
| C | -1.168207 | -1.341126 | -0.000324 |
| C | -0.411924 | -2.397015 | -0.832396 |
| H | -0.897470 | -3.367383 | -0.716357 |
| H | -0.419300 | -2.128841 | -1.889721 |
| H | 0.624007  | -2.504510 | -0.514289 |
| C | -1.238855 | 1.315109  | -0.037184 |
| C | -2.307406 | 1.575850  | -1.122763 |
| H | -2.633943 | 2.616513  | -1.069452 |
| H | -1.882737 | 1.399286  | -2.111689 |
| H | -3.192617 | 0.958470  | -1.013569 |
| C | -1.881693 | 1.450641  | 1.356765  |
| H | -2.319564 | 2.445403  | 1.466550  |
| H | -2.677658 | 0.725417  | 1.515148  |
| H | -1.139138 | 1.323016  | 2.145186  |
| C | 0.880445  | 0.008156  | -0.114773 |
| C | 1.687214  | -0.044733 | -1.253632 |

|   |           |           |           |
|---|-----------|-----------|-----------|
| C | 1.511496  | 0.082130  | 1.131825  |
| C | 3.074028  | -0.034159 | -1.157893 |
| H | 1.204560  | -0.093459 | -2.220903 |
| C | 2.898785  | 0.097389  | 1.233805  |
| H | 0.911722  | 0.148523  | 2.028455  |
| C | 3.686875  | 0.035110  | 0.089363  |
| H | 3.675703  | -0.076455 | -2.057565 |
| H | 3.363758  | 0.161388  | 2.210059  |
| H | 4.766702  | 0.045282  | 0.168459  |
| C | -1.101386 | -1.784418 | 1.480606  |
| H | -1.613289 | -1.087470 | 2.140603  |
| H | -1.576418 | -2.761673 | 1.592615  |
| H | -0.070452 | -1.884372 | 1.816941  |
| C | -2.633689 | -1.407035 | -0.452898 |
| H | -2.733424 | -1.146404 | -1.505833 |
| H | -2.990808 | -2.429564 | -0.322912 |
| H | -3.285462 | -0.763500 | 0.133510  |
| C | -0.221311 | 2.465440  | -0.187031 |
| H | 0.543453  | 2.453943  | 0.586857  |
| H | 0.274920  | 2.431664  | -1.157322 |
| H | -0.756421 | 3.412439  | -0.112373 |

39

7 SCF Done: -694.623963076 A.U.

|   |           |           |           |
|---|-----------|-----------|-----------|
| N | 1.036965  | -0.035235 | 0.278565  |
| C | 1.591815  | -1.282378 | -0.356381 |
| C | 1.151287  | -2.489328 | 0.496637  |
| H | 1.610771  | -3.397531 | 0.103975  |
| H | 1.465966  | -2.362154 | 1.533276  |
| H | 0.071892  | -2.634336 | 0.480073  |
| C | 1.587718  | 1.350769  | 0.052806  |
| C | 2.916368  | 1.538572  | 0.817745  |
| H | 3.181803  | 2.597508  | 0.829887  |
| H | 2.803273  | 1.200672  | 1.848450  |
| H | 3.749012  | 1.006522  | 0.370613  |
| C | 1.791437  | 1.714428  | -1.429855 |
| H | 2.149882  | 2.742933  | -1.510460 |
| H | 2.526754  | 1.074419  | -1.913352 |
| H | 0.856225  | 1.643290  | -1.986338 |
| C | -0.367582 | -0.109600 | 0.535857  |
| C | -1.331088 | 0.096958  | -0.451865 |
| C | -0.809085 | -0.385725 | 1.833001  |
| C | -2.693920 | 0.025358  | -0.144039 |
| H | -1.029090 | 0.334817  | -1.460489 |
| C | -2.162173 | -0.463036 | 2.142372  |
| H | -0.063952 | -0.536913 | 2.602207  |
| C | -3.117044 | -0.259871 | 1.158058  |
| H | -4.172466 | -0.315161 | 1.386138  |
| H | -2.473059 | -0.678179 | 3.156239  |
| C | 1.098582  | -1.527774 | -1.801078 |
| H | 1.364049  | -0.711858 | -2.469736 |
| H | 1.551521  | -2.441376 | -2.191844 |
| H | 0.018357  | -1.665375 | -1.835186 |

|   |           |           |           |
|---|-----------|-----------|-----------|
| C | 3.126371  | -1.296341 | -0.362030 |
| H | 3.525608  | -1.170893 | 0.643471  |
| H | 3.461246  | -2.263126 | -0.739904 |
| H | 3.553201  | -0.534216 | -1.009736 |
| C | 0.620912  | 2.391545  | 0.655118  |
| H | -0.333380 | 2.435061  | 0.133556  |
| H | 0.426159  | 2.190604  | 1.709192  |
| H | 1.082629  | 3.375873  | 0.578904  |
| C | -3.659347 | 0.250924  | -1.173379 |
| N | -4.435809 | 0.432722  | -2.006672 |

39

8 SCF Done: -694.625865996 A.U.

|   |           |           |           |
|---|-----------|-----------|-----------|
| N | 0.622336  | -0.004699 | -0.016713 |
| C | 1.286266  | 1.076783  | -0.827154 |
| C | 0.417801  | 1.344166  | -2.073016 |
| H | 0.911873  | 2.083581  | -2.704540 |
| H | 0.282029  | 0.431542  | -2.653247 |
| H | -0.563922 | 1.739484  | -1.813385 |
| C | 1.326260  | -0.857238 | 1.011757  |
| C | 2.207711  | -1.923438 | 0.326555  |
| H | 2.527841  | -2.659601 | 1.066799  |
| H | 1.636244  | -2.436810 | -0.446460 |
| H | 3.104997  | -1.511783 | -0.123182 |
| C | 2.169906  | -0.045326 | 2.010756  |
| H | 2.611954  | -0.717865 | 2.748899  |
| H | 2.985705  | 0.486020  | 1.525080  |
| H | 1.554384  | 0.680741  | 2.543856  |
| C | -0.768426 | 0.210601  | 0.200345  |
| C | -1.702812 | -0.549236 | -0.530102 |
| C | -1.274573 | 1.135693  | 1.115317  |
| C | -3.081266 | -0.372657 | -0.363389 |
| C | -2.642381 | 1.314568  | 1.284539  |
| H | -0.582952 | 1.706894  | 1.716603  |
| C | -3.549828 | 0.566075  | 0.541172  |
| H | -3.770475 | -0.973752 | -0.940920 |
| H | -3.001418 | 2.038197  | 2.005341  |
| H | -4.614362 | 0.706779  | 0.671996  |
| C | 1.452902  | 2.421681  | -0.082092 |
| H | 2.036781  | 2.319222  | 0.829365  |
| H | 1.967324  | 3.134556  | -0.730047 |
| H | 0.487814  | 2.857762  | 0.172219  |
| C | 2.661499  | 0.635486  | -1.345737 |
| H | 2.587893  | -0.293461 | -1.908793 |
| H | 3.043646  | 1.408088  | -2.014178 |
| H | 3.391919  | 0.510115  | -0.549820 |
| C | 0.284713  | -1.646256 | 1.831663  |
| H | -0.364381 | -1.000614 | 2.420672  |
| H | -0.337789 | -2.274789 | 1.194676  |
| H | 0.816783  | -2.299462 | 2.523041  |
| C | -1.238094 | -1.541162 | -1.447956 |
| N | -0.909473 | -2.360055 | -2.190420 |

39

9 SCF Done: -694.624155539 A.U.

|   |           |           |           |
|---|-----------|-----------|-----------|
| N | -1.103202 | -0.002276 | -0.272816 |
| C | -1.721271 | -1.341813 | 0.029333  |
| C | -0.987905 | -2.408270 | -0.809279 |
| H | -1.475029 | -3.374595 | -0.671360 |
| H | -1.019279 | -2.152554 | -1.869131 |
| H | 0.054310  | -2.521251 | -0.513486 |
| C | -1.785185 | 1.322186  | -0.034068 |
| C | -2.871259 | 1.571473  | -1.103611 |
| H | -3.195301 | 2.612952  | -1.055437 |
| H | -2.464527 | 1.383620  | -2.097870 |
| H | -3.754643 | 0.956276  | -0.971333 |
| C | -2.400435 | 1.472972  | 1.369629  |
| H | -2.834809 | 2.469471  | 1.474944  |
| H | -3.194184 | 0.750994  | 1.551061  |
| H | -1.644608 | 1.355020  | 2.146861  |
| C | 0.320402  | 0.002774  | -0.146226 |
| C | 1.101720  | -0.092106 | -1.302034 |
| C | 0.978422  | 0.110420  | 1.085894  |
| C | 2.484849  | -0.089434 | -1.243470 |
| H | 0.599354  | -0.166158 | -2.256453 |
| C | 2.361281  | 0.118942  | 1.164757  |
| H | 0.399150  | 0.205989  | 1.992266  |
| C | 3.124453  | 0.014539  | -0.003113 |
| H | 3.071742  | -0.162614 | -2.149025 |
| H | 2.852980  | 0.207937  | 2.124130  |
| C | -1.616891 | -1.763510 | 1.513284  |
| H | -2.109701 | -1.055961 | 2.176345  |
| H | -2.091615 | -2.737317 | 1.650797  |
| H | -0.578259 | -1.864532 | 1.825896  |
| C | -3.196697 | -1.405144 | -0.387482 |
| H | -3.320048 | -1.157637 | -1.440921 |
| H | -3.554495 | -2.424292 | -0.235911 |
| H | -3.831190 | -0.751496 | 0.206329  |
| C | -0.764529 | 2.464853  | -0.217094 |
| H | 0.010709  | 2.466413  | 0.546653  |
| H | -0.283122 | 2.415429  | -1.194366 |
| H | -1.294656 | 3.414823  | -0.149966 |
| C | 4.550258  | 0.019490  | 0.069910  |
| N | 5.702339  | 0.023027  | 0.128730  |

54

10 SCF Done: -1060.71835807 A.U.

|   |           |           |           |
|---|-----------|-----------|-----------|
| N | -0.202366 | -0.077116 | 0.015417  |
| C | -1.624602 | -0.412070 | -0.184734 |
| C | -1.922470 | -1.480079 | -1.255638 |
| C | -2.303783 | -0.788299 | 1.141719  |
| H | -2.114097 | 0.502932  | -0.529817 |
| C | -3.431743 | -1.677893 | -1.433885 |
| H | -1.474386 | -2.432877 | -0.958219 |
| H | -1.464599 | -1.198021 | -2.204646 |
| C | -3.810561 | -0.999664 | 0.965501  |
| H | -1.856577 | -1.709011 | 1.530779  |

|   |           |           |           |
|---|-----------|-----------|-----------|
| H | -2.103429 | -0.002164 | 1.869685  |
| C | -4.110236 | -2.043883 | -0.112178 |
| H | -3.618501 | -2.449723 | -2.185125 |
| H | -3.872856 | -0.751867 | -1.820863 |
| H | -4.259981 | -1.293593 | 1.917682  |
| H | -4.274620 | -0.047784 | 0.681433  |
| H | -5.189335 | -2.145802 | -0.254595 |
| H | -3.742004 | -3.021019 | 0.221447  |
| C | 0.691161  | -1.216464 | 0.272703  |
| C | 1.456607  | -1.802414 | -0.932089 |
| C | 1.645183  | -1.001364 | 1.460149  |
| H | 0.013356  | -2.006577 | 0.602677  |
| C | 2.167827  | -3.104270 | -0.545452 |
| H | 2.195620  | -1.082810 | -1.285281 |
| H | 0.766131  | -1.984811 | -1.756036 |
| C | 2.349970  | -2.307344 | 1.841161  |
| H | 2.409025  | -0.261643 | 1.216636  |
| H | 1.077253  | -0.602468 | 2.302641  |
| C | 3.103226  | -2.901451 | 0.648642  |
| H | 2.723628  | -3.492857 | -1.402954 |
| H | 1.418623  | -3.862659 | -0.288973 |
| H | 3.033918  | -2.130829 | 2.675378  |
| H | 1.605607  | -3.030939 | 2.193366  |
| H | 3.573626  | -3.847767 | 0.928583  |
| H | 3.912106  | -2.220146 | 0.359567  |
| C | 0.230450  | 1.161139  | -0.625184 |
| C | 0.194372  | 1.139746  | -2.168673 |
| H | -0.830635 | 1.001035  | -2.507823 |
| H | 0.561674  | 2.075932  | -2.584584 |
| H | 0.804548  | 0.323757  | -2.541714 |
| C | 1.637564  | 1.602829  | -0.131766 |
| C | -0.662461 | 2.351461  | -0.153542 |
| O | 2.610956  | 1.215893  | -0.957266 |
| O | 1.832439  | 2.256294  | 0.863332  |
| O | -0.895314 | 3.309473  | -0.852682 |
| O | -1.108227 | 2.220034  | 1.091165  |
| C | 3.953928  | 1.583793  | -0.582813 |
| H | 4.592333  | 1.180158  | -1.362538 |
| H | 4.045620  | 2.667358  | -0.529708 |
| H | 4.207485  | 1.150352  | 0.383967  |
| C | -1.894698 | 3.311585  | 1.603613  |
| H | -2.171091 | 3.020592  | 2.612627  |
| H | -1.305896 | 4.228008  | 1.616218  |
| H | -2.783218 | 3.459360  | 0.990672  |

51

11 SCF Done: -909.960522644 A.U.

|   |           |          |           |
|---|-----------|----------|-----------|
| N | 0.143588  | 0.987531 | -0.211009 |
| C | 0.206228  | 2.467744 | -0.232355 |
| C | -0.781531 | 3.051625 | -1.240821 |
| H | -1.815509 | 2.905842 | -0.924620 |
| H | -0.608844 | 4.124781 | -1.341223 |
| H | -0.656429 | 2.587950 | -2.220216 |

|   |           |           |           |
|---|-----------|-----------|-----------|
| H | 1.201713  | 2.716551  | -0.600281 |
| C | 0.036095  | 3.134728  | 1.140441  |
| H | 0.746504  | 2.741456  | 1.869511  |
| H | 0.203331  | 4.210952  | 1.058742  |
| H | -0.972514 | 2.980689  | 1.528379  |
| C | -1.170916 | 0.450260  | -0.004118 |
| C | -1.920609 | 0.041724  | -1.101643 |
| C | -1.742324 | 0.298470  | 1.266197  |
| C | -3.203074 | -0.485208 | -0.963286 |
| H | -1.487852 | 0.139431  | -2.088376 |
| C | -3.010525 | -0.233770 | 1.424676  |
| H | -1.182876 | 0.590048  | 2.144865  |
| C | -3.754828 | -0.626743 | 0.309042  |
| H | -3.748468 | -0.786321 | -1.845602 |
| H | -3.446149 | -0.352052 | 2.408733  |
| O | -4.993689 | -1.136134 | 0.565636  |
| C | -5.794218 | -1.557508 | -0.532959 |
| H | -6.725062 | -1.920821 | -0.104148 |
| H | -6.007905 | -0.727127 | -1.212055 |
| H | -5.312366 | -2.365864 | -1.090359 |
| C | 1.196870  | 0.299323  | 0.562863  |
| H | 1.041909  | 0.439506  | 1.644638  |
| C | 2.618528  | 0.815397  | 0.239416  |
| C | 1.170176  | -1.224035 | 0.282592  |
| H | 2.682161  | 1.885604  | 0.440648  |
| C | 2.970746  | 0.536267  | -1.230991 |
| C | 3.630891  | 0.102185  | 1.153391  |
| H | 0.173170  | -1.610506 | 0.498327  |
| C | 1.521210  | -1.504249 | -1.187250 |
| C | 2.186281  | -1.929125 | 1.195144  |
| H | 3.967777  | 0.931607  | -1.449240 |
| H | 2.265261  | 1.044427  | -1.892022 |
| C | 2.933139  | -0.978920 | -1.491359 |
| H | 3.400811  | 0.310940  | 2.202899  |
| H | 4.632397  | 0.498420  | 0.959976  |
| C | 3.600331  | -1.410640 | 0.896787  |
| H | 0.791778  | -1.024672 | -1.841852 |
| H | 1.472268  | -2.581666 | -1.374188 |
| H | 1.935373  | -1.753855 | 2.246128  |
| H | 2.136255  | -3.009620 | 1.029510  |
| H | 3.182961  | -1.176917 | -2.537832 |
| C | 3.949148  | -1.684588 | -0.576383 |
| H | 4.324171  | -1.910755 | 1.546813  |
| H | 3.939822  | -2.762236 | -0.768522 |
| H | 4.960997  | -1.327054 | -0.792956 |

35

12 SCF Done: -487.932754111 A.U.

|   |           |           |           |
|---|-----------|-----------|-----------|
| N | 0.008239  | -0.139028 | -0.236269 |
| C | -1.421477 | 0.329330  | -0.024823 |
| C | -2.395806 | -0.868625 | -0.049189 |
| H | -2.230783 | -1.567441 | 0.767110  |
| H | -3.409225 | -0.478849 | 0.052310  |

|   |           |           |           |
|---|-----------|-----------|-----------|
| H | -2.342280 | -1.411090 | -0.991538 |
| C | -1.658867 | 1.037380  | 1.326134  |
| H | -1.110823 | 1.971525  | 1.417962  |
| H | -2.719976 | 1.270658  | 1.437161  |
| H | -1.372951 | 0.390816  | 2.157697  |
| C | 1.159803  | 0.832767  | -0.029146 |
| C | 0.858424  | 2.258529  | -0.519432 |
| H | 0.066872  | 2.753523  | 0.034725  |
| H | 1.760280  | 2.857226  | -0.386683 |
| H | 0.608495  | 2.268733  | -1.579676 |
| C | 2.370297  | 0.376573  | -0.876117 |
| H | 2.055325  | 0.130860  | -1.890810 |
| H | 3.098743  | 1.187559  | -0.929457 |
| H | 2.879421  | -0.481238 | -0.447718 |
| C | 1.632867  | 0.920727  | 1.439758  |
| H | 2.499314  | 1.582581  | 1.502649  |
| H | 0.864706  | 1.316001  | 2.101119  |
| H | 1.941318  | -0.054129 | 1.816662  |
| C | -1.887719 | 1.228918  | -1.191021 |
| H | -1.507141 | 2.242600  | -1.147711 |
| H | -1.586048 | 0.786425  | -2.141295 |
| H | -2.976933 | 1.299363  | -1.178217 |
| C | 0.269420  | -1.415306 | 0.397148  |
| C | -0.136306 | -2.723683 | -0.232098 |
| C | 1.313477  | -2.385096 | -0.108287 |
| H | 0.177139  | -1.428521 | 1.484101  |
| H | -0.549399 | -2.686272 | -1.229730 |
| H | -0.575029 | -3.477005 | 0.409670  |
| H | 1.924317  | -2.890126 | 0.629176  |
| H | 1.822295  | -2.159091 | -1.031181 |

34

13 SCF Done: -449.860041323 A.U.

|   |           |           |           |
|---|-----------|-----------|-----------|
| N | 0.143853  | -0.034286 | 0.264361  |
| C | -1.183156 | -0.647684 | 0.006856  |
| C | -1.359703 | -1.877819 | 0.925820  |
| H | -1.191487 | -1.594905 | 1.965935  |
| H | -2.375034 | -2.267721 | 0.831245  |
| H | -0.681299 | -2.694149 | 0.679933  |
| C | -2.330743 | 0.306777  | 0.372819  |
| H | -2.344351 | 1.207057  | -0.236006 |
| H | -3.279743 | -0.206782 | 0.212066  |
| H | -2.278877 | 0.596292  | 1.422029  |
| C | 0.426464  | 1.397036  | 0.066344  |
| C | 0.067832  | 2.003408  | -1.304420 |
| H | -1.008275 | 2.081684  | -1.455881 |
| H | 0.480361  | 3.013146  | -1.375170 |
| H | 0.481527  | 1.414017  | -2.121188 |
| C | -0.066458 | 2.304893  | 1.206877  |
| H | 0.460523  | 3.261774  | 1.163078  |
| H | -1.131957 | 2.520115  | 1.151656  |
| H | 0.140949  | 1.842288  | 2.172459  |
| C | -1.370297 | -1.100150 | -1.459697 |



|   |           |           |           |
|---|-----------|-----------|-----------|
| H | -1.304067 | -0.255774 | -2.144958 |
| H | -0.612883 | -1.831256 | -1.745262 |
| H | -2.347659 | -1.570046 | -1.593937 |
| C | 1.313974  | -0.907458 | 0.054807  |
| C | 2.268195  | -0.841352 | 1.254575  |
| H | 3.099008  | -1.540412 | 1.129755  |
| H | 2.693645  | 0.158197  | 1.371588  |
| H | 1.736591  | -1.091055 | 2.173571  |
| C | 2.088052  | -0.698955 | -1.260694 |
| H | 2.860366  | -1.465547 | -1.357379 |
| H | 1.430966  | -0.771349 | -2.126773 |
| H | 2.587585  | 0.271130  | -1.293813 |
| H | 0.939065  | -1.927374 | 0.017549  |
| H | 1.513106  | 1.458489  | 0.129243  |

37

14 SCF Done: -489.168228604 A.U.

|   |           |           |           |
|---|-----------|-----------|-----------|
| N | 0.000808  | 0.153031  | -0.079607 |
| C | 1.503077  | 0.199340  | -0.015021 |
| C | 2.044070  | 1.580230  | 0.429150  |
| H | 1.623877  | 1.898822  | 1.384323  |
| H | 3.123450  | 1.493378  | 0.557465  |
| H | 1.879106  | 2.362845  | -0.311860 |
| C | 2.116116  | -0.776446 | 1.016545  |
| H | 1.872650  | -1.818082 | 0.839582  |
| H | 3.204001  | -0.694239 | 0.981380  |
| H | 1.791682  | -0.517131 | 2.025241  |
| C | -0.748530 | -1.137067 | -0.012072 |
| C | -0.110266 | -2.252763 | -0.870906 |
| H | 0.890771  | -2.535317 | -0.562859 |
| H | -0.730330 | -3.147939 | -0.797107 |
| H | -0.074759 | -1.954822 | -1.919120 |
| C | -2.168968 | -1.003040 | -0.604034 |
| H | -2.134374 | -0.698739 | -1.648688 |
| H | -2.653385 | -1.979111 | -0.557063 |
| H | -2.800027 | -0.309033 | -0.057269 |
| C | -0.923907 | -1.662597 | 1.437794  |
| H | -1.412617 | -0.916461 | 2.061715  |
| H | -1.545911 | -2.561549 | 1.440733  |
| H | 0.023710  | -1.918926 | 1.902374  |
| C | 2.123678  | -0.058220 | -1.409832 |
| H | 1.951422  | -1.069719 | -1.765306 |
| H | 1.690868  | 0.634164  | -2.134040 |
| H | 3.204728  | 0.103948  | -1.386112 |
| C | -0.719602 | 1.434835  | 0.010682  |
| C | -1.535248 | 1.663534  | 1.297318  |
| H | -1.870142 | 2.703691  | 1.335392  |
| H | -2.422964 | 1.035858  | 1.364271  |
| H | -0.919355 | 1.473154  | 2.177849  |
| C | -1.518406 | 1.871192  | -1.240371 |
| H | -1.613767 | 2.960680  | -1.235165 |
| H | -0.985420 | 1.582924  | -2.147346 |
| H | -2.525581 | 1.463194  | -1.289829 |

H 0.054623 2.183211 0.063177  
40

15 SCF Done: -528.471555798 A.U.

N -0.000056 0.000144 -0.272474  
C 1.025538 1.102286 -0.029818  
C 0.493757 2.543576 -0.234680  
H -0.323375 2.824569 0.418526  
H 1.318975 3.217950 -0.006353  
H 0.205591 2.726006 -1.267363  
C 1.625216 1.100962 1.399213  
H 2.094371 0.160732 1.668404  
H 2.390501 1.877059 1.476007  
H 0.860152 1.312131 2.145104  
C 0.441867 -1.439142 -0.029736  
C 1.955915 -1.698977 -0.234960  
H 2.607913 -1.131806 0.418134  
H 2.127558 -2.750841 -0.006904  
H 2.257738 -1.540330 -1.267665  
C -0.183830 -2.400339 -1.086616  
H -0.251122 -1.894595 -2.049463  
H 0.460576 -3.271655 -1.209165  
H -1.162959 -2.780563 -0.824169  
C 0.140867 -1.958122 1.399183  
H 0.430208 -3.008999 1.475640  
H 0.706357 -1.401501 2.145269  
H -0.908008 -1.894273 1.668383  
C 2.170748 1.040717 -1.086864  
H 2.989810 0.383262 -0.824043  
H 1.766461 0.728723 -2.049520  
H 2.602907 2.034465 -1.210083  
C -1.467416 0.336997 -0.029877  
C -1.986833 1.359525 -1.086764  
H -3.063799 1.237918 -1.208607  
H -1.825571 2.397549 -0.824710  
H -1.515874 1.164242 -2.049860  
C -1.766462 0.856810 1.399120  
H -2.821445 1.130662 1.475971  
H -1.566096 0.089027 2.145216  
H -1.187412 1.733750 1.668039  
C -2.449360 -0.844292 -0.235228  
H -3.446155 -0.467066 -0.007189  
H -2.462799 -1.184922 -1.267975  
H -2.284156 -1.692511 0.417867

35

16 SCF Done: -487.985669891 A.U.

N 0.050575 0.217560 0.218060  
C -1.345871 -0.308480 -0.015743  
C -1.163170 -1.839893 -0.139078  
C 0.190726 -2.105824 0.484650  
C 1.035252 -0.894038 0.062637  
H -1.162577 -2.138290 -1.188891  
H -1.977563 -2.378981 0.345686

|   |           |           |           |
|---|-----------|-----------|-----------|
| H | 0.115511  | -2.125927 | 1.574732  |
| H | 0.644878  | -3.044497 | 0.164430  |
| C | -2.227788 | -0.019139 | 1.212254  |
| H | -2.324403 | 1.045168  | 1.412220  |
| H | -3.230925 | -0.427896 | 1.063678  |
| H | -1.793559 | -0.486483 | 2.097755  |
| C | -2.033017 | 0.197356  | -1.296302 |
| H | -2.958892 | -0.363173 | -1.441753 |
| H | -2.295361 | 1.253454  | -1.262812 |
| H | -1.403317 | 0.030124  | -2.171420 |
| C | 2.231955  | -0.802714 | 1.024519  |
| H | 2.682729  | -1.793629 | 1.121631  |
| H | 3.014210  | -0.126871 | 0.689731  |
| H | 1.893728  | -0.481413 | 2.010385  |
| C | 1.538242  | -1.088027 | -1.384106 |
| H | 2.073297  | -0.212230 | -1.748203 |
| H | 2.222961  | -1.937819 | -1.433349 |
| H | 0.714447  | -1.278999 | -2.072143 |
| C | 0.352087  | 1.560693  | -0.312093 |
| H | 0.183230  | 1.593947  | -1.400180 |
| C | -0.538939 | 2.636997  | 0.329079  |
| H | -0.268390 | 3.616587  | -0.070003 |
| H | -1.598441 | 2.495506  | 0.140275  |
| H | -0.385574 | 2.650981  | 1.410545  |
| C | 1.797899  | 2.016434  | -0.081537 |
| H | 2.532846  | 1.412630  | -0.605276 |
| H | 1.900169  | 3.038044  | -0.450963 |
| H | 2.042715  | 2.016659  | 0.981829  |

38

17 SCF Done: -527.308949638 A.U.

|   |           |           |           |
|---|-----------|-----------|-----------|
| N | 0.054104  | 0.008349  | -0.174672 |
| C | -0.754813 | -1.246103 | -0.014502 |
| C | -2.125347 | -0.727373 | 0.460045  |
| C | -2.220187 | 0.651099  | -0.147473 |
| C | -0.797094 | 1.224569  | -0.009469 |
| H | -2.138437 | -0.663631 | 1.550485  |
| H | -2.933493 | -1.396286 | 0.161735  |
| H | -2.484309 | 0.583606  | -1.205248 |
| H | -2.955872 | 1.296646  | 0.333408  |
| C | -0.931390 | -1.958125 | -1.374583 |
| H | 0.015640  | -2.321004 | -1.767436 |
| H | -1.602573 | -2.815469 | -1.274447 |
| H | -1.356009 | -1.273139 | -2.109471 |
| C | -0.279407 | -2.275391 | 1.025875  |
| H | -1.040834 | -3.055346 | 1.101883  |
| H | 0.656148  | -2.765535 | 0.764812  |
| H | -0.172623 | -1.821201 | 2.010111  |
| C | -0.646988 | 2.291400  | -1.115023 |
| H | -1.546020 | 2.913139  | -1.121707 |
| H | 0.198917  | 2.958367  | -0.972977 |
| H | -0.556633 | 1.813636  | -2.091232 |
| C | -0.654613 | 1.908838  | 1.367081  |

|   |           |           |           |
|---|-----------|-----------|-----------|
| H | 0.343771  | 2.317902  | 1.514320  |
| H | -1.362742 | 2.737252  | 1.448282  |
| H | -0.853048 | 1.207450  | 2.178452  |
| C | 1.532515  | 0.019134  | -0.031921 |
| C | 2.169608  | -1.085286 | -0.901198 |
| H | 3.256430  | -1.031920 | -0.812666 |
| H | 1.873187  | -2.087274 | -0.605044 |
| H | 1.904426  | -0.944221 | -1.949676 |
| C | 2.144371  | 1.332173  | -0.557250 |
| H | 1.869010  | 2.195597  | 0.043604  |
| H | 3.231064  | 1.247539  | -0.517010 |
| H | 1.861163  | 1.516834  | -1.592091 |
| C | 2.041441  | -0.152004 | 1.425685  |
| H | 3.121972  | 0.007311  | 1.462245  |
| H | 1.574849  | 0.570555  | 2.092539  |
| H | 1.848706  | -1.146831 | 1.816217  |

26

18 SCF Done: -370.002099305 A.U.

|   |           |           |           |
|---|-----------|-----------|-----------|
| N | -0.287432 | -0.000772 | -0.146582 |
| C | 2.650853  | 0.000830  | 0.118093  |
| C | 1.861766  | -1.243983 | -0.276618 |
| C | 0.441269  | -1.200573 | 0.281492  |
| C | 0.440139  | 1.201258  | 0.276969  |
| C | 1.860683  | 1.243477  | -0.281230 |
| H | -0.091786 | -2.084469 | -0.059919 |
| H | 1.808621  | -1.312918 | -1.367819 |
| H | 2.355419  | -2.151223 | 0.081326  |
| H | 2.807509  | 0.002894  | 1.202850  |
| H | 3.639736  | 0.000416  | -0.346948 |
| H | -0.093410 | 2.083336  | -0.068327 |
| H | 0.481807  | 1.260057  | 1.382161  |
| H | 1.807413  | 1.308196  | -1.372689 |
| H | 2.353637  | 2.152476  | 0.073195  |
| H | 0.483140  | -1.254709 | 1.386908  |
| C | -1.692986 | -0.001397 | 0.311043  |
| H | -1.715480 | -0.004871 | 1.417567  |
| C | -2.443565 | -1.245062 | -0.177724 |
| H | -2.086917 | -2.165759 | 0.280947  |
| H | -3.502648 | -1.153540 | 0.066731  |
| H | -2.348907 | -1.340330 | -1.262314 |
| C | -2.443046 | 1.245711  | -0.169405 |
| H | -3.502484 | 1.151749  | 0.072525  |
| H | -2.087517 | 2.162856  | 0.297227  |
| H | -2.346785 | 1.349669  | -1.253065 |

38

19 SCF Done: -527.29140348 A.U.

|   |           |           |           |
|---|-----------|-----------|-----------|
| N | -0.340016 | 0.000216  | -0.291891 |
| C | 2.618924  | -0.001601 | 0.175023  |
| C | 1.915363  | -1.201641 | -0.408115 |
| C | 0.411834  | -1.305731 | -0.056899 |
| C | 0.413339  | 1.305371  | -0.056669 |
| C | 1.916927  | 1.199628  | -0.407549 |

|   |           |           |           |
|---|-----------|-----------|-----------|
| H | 2.017155  | -1.158287 | -1.497342 |
| H | 2.381611  | -2.136034 | -0.089746 |
| H | 2.582304  | -0.001858 | 1.267125  |
| H | 3.676084  | -0.002151 | -0.103375 |
| H | 2.019039  | 1.156746  | -1.496759 |
| H | 2.384177  | 2.133299  | -0.088523 |
| C | -1.723786 | 0.000992  | 0.298382  |
| H | -1.652399 | 0.001384  | 1.395255  |
| C | -2.589467 | -1.215019 | -0.076344 |
| H | -2.258194 | -2.146301 | 0.367587  |
| H | -3.599774 | -1.039599 | 0.294074  |
| H | -2.645679 | -1.341061 | -1.158470 |
| C | -2.588195 | 1.217532  | -0.077530 |
| H | -3.599029 | 1.043263  | 0.291972  |
| H | -2.256438 | 2.148688  | 0.366309  |
| H | -2.643200 | 1.343184  | -1.159757 |
| C | 0.319461  | 1.814922  | 1.399377  |
| H | -0.705059 | 1.976539  | 1.726501  |
| H | 0.781951  | 1.118563  | 2.098465  |
| H | 0.840672  | 2.770484  | 1.486775  |
| C | -0.073276 | 2.412107  | -1.031333 |
| H | 0.711167  | 3.164909  | -1.131206 |
| H | -0.255642 | 1.979901  | -2.015209 |
| H | -0.965263 | 2.938063  | -0.714845 |
| C | 0.317675  | -1.815327 | 1.399164  |
| H | -0.707009 | -1.975448 | 1.726442  |
| H | 0.837620  | -2.771594 | 1.486327  |
| H | 0.781286  | -1.119640 | 2.098165  |
| C | -0.076334 | -2.411776 | -1.031568 |
| H | -0.258839 | -1.979134 | -2.015236 |
| H | 0.707427  | -3.165205 | -1.132152 |
| H | -0.968650 | -2.936971 | -0.714776 |

29

20 SCF Done: -409.33262729 A.U.

|   |           |           |           |
|---|-----------|-----------|-----------|
| N | -0.0600   | 0.00100   | -0.223000 |
| C | 2.847976  | -0.000067 | 0.145622  |
| C | 2.070720  | -1.248268 | -0.266186 |
| C | 0.633690  | -1.197451 | 0.252280  |
| C | 0.633755  | 1.197605  | 0.252215  |
| C | 2.070838  | 1.248217  | -0.266165 |
| H | 0.106847  | -2.085802 | -0.086473 |
| H | 2.047010  | -1.323268 | -1.357880 |
| H | 2.556732  | -2.151593 | 0.112495  |
| H | 2.979363  | -0.000085 | 1.233898  |
| H | 3.848172  | -0.000123 | -0.294889 |
| H | 0.107078  | 2.085951  | -0.086751 |
| H | 0.656180  | 1.237336  | 1.356377  |
| H | 2.047197  | 1.323231  | -1.357860 |
| H | 2.556921  | 2.151494  | 0.112539  |
| H | 0.656239  | -1.237015 | 1.356434  |
| C | -1.541067 | -0.000017 | -0.033974 |
| C | -2.140717 | -1.236751 | -0.724783 |

|   |           |           |           |
|---|-----------|-----------|-----------|
| H | -1.903866 | -2.163856 | -0.203687 |
| H | -3.228003 | -1.152125 | -0.749517 |
| H | -1.776148 | -1.313349 | -1.750904 |
| C | -2.140677 | 1.238172  | -0.722175 |
| H | -3.227921 | 1.153294  | -0.747587 |
| H | -1.904297 | 2.164108  | -0.198769 |
| H | -1.775685 | 1.317219  | -1.747964 |
| C | -1.954401 | -0.001504 | 1.451275  |
| H | -1.577782 | 0.882038  | 1.969204  |
| H | -3.042597 | -0.000983 | 1.541299  |
| H | -1.578793 | -0.886652 | 1.967188  |

31

21 SCF Done: -410.538509340 A.U.

|   |           |           |           |
|---|-----------|-----------|-----------|
| N | 0.000298  | 0.000212  | -0.268251 |
| C | -1.347761 | 0.529839  | -0.062221 |
| C | -2.287906 | 0.111311  | -1.200457 |
| H | -2.429691 | -0.971861 | -1.219985 |
| H | -3.272519 | 0.569614  | -1.079856 |
| H | -1.876205 | 0.415496  | -2.163618 |
| C | -1.980152 | 0.205069  | 1.303398  |
| H | -1.343682 | 0.534744  | 2.124001  |
| H | -2.947528 | 0.703552  | 1.400756  |
| H | -2.151160 | -0.867777 | 1.415448  |
| C | 1.132899  | 0.902524  | -0.060737 |
| C | 1.240264  | 1.927516  | -1.197647 |
| H | 0.373478  | 2.592440  | -1.215563 |
| H | 2.129967  | 2.550325  | -1.076913 |
| H | 1.296576  | 1.419806  | -2.161406 |
| C | 1.167681  | 1.610344  | 1.306070  |
| H | 2.082631  | 2.199448  | 1.404078  |
| H | 0.323564  | 2.294033  | 1.419604  |
| H | 1.135903  | 0.892942  | 2.125519  |
| C | 0.215217  | -1.432180 | -0.062970 |
| C | 0.808680  | -1.818917 | 1.304017  |
| H | 0.862221  | -2.906024 | 1.399474  |
| H | 1.822203  | -1.429024 | 1.420398  |
| H | 0.201340  | -1.435313 | 2.123303  |
| C | 1.051053  | -2.035546 | -1.199585 |
| H | 1.145829  | -3.117601 | -1.080417 |
| H | 0.584380  | -1.829380 | -2.163611 |
| H | 2.060124  | -1.616906 | -1.215533 |
| H | -0.771305 | -1.896346 | -0.121927 |
| H | 2.028232  | 0.280185  | -0.117313 |
| H | -1.256299 | 1.616409  | -0.117890 |

25

22 SCF Done: -331.889165292 A.U.

|   |           |           |           |
|---|-----------|-----------|-----------|
| N | 0.210013  | -0.568144 | -0.390992 |
| C | -1.131603 | -0.052744 | -0.014072 |
| C | -2.129758 | -1.158073 | -0.385977 |
| H | -1.960953 | -2.055877 | 0.214932  |
| H | -3.154697 | -0.826654 | -0.213822 |
| H | -2.028007 | -1.424999 | -1.440022 |

|   |           |           |           |
|---|-----------|-----------|-----------|
| C | -1.268718 | 0.257817  | 1.486060  |
| H | -0.614558 | 1.075428  | 1.792388  |
| H | -2.294281 | 0.551766  | 1.718479  |
| H | -1.022224 | -0.619393 | 2.088613  |
| C | 1.428035  | -0.085235 | 0.276823  |
| C | 1.767720  | 1.359429  | -0.087908 |
| H | 2.744586  | 1.625803  | 0.321121  |
| H | 1.800122  | 1.480146  | -1.173136 |
| H | 1.042788  | 2.066280  | 0.313136  |
| C | 2.573894  | -1.013942 | -0.125949 |
| H | 3.500717  | -0.717661 | 0.368136  |
| H | 2.361654  | -2.049089 | 0.153996  |
| H | 2.730863  | -0.979055 | -1.206601 |
| H | 1.333569  | -0.138006 | 1.372207  |
| C | -1.473481 | 1.198221  | -0.839449 |
| H | -0.816345 | 2.033905  | -0.607103 |
| H | -1.381105 | 0.980215  | -1.904564 |
| H | -2.499023 | 1.516121  | -0.637541 |
| H | 0.190270  | -1.574771 | -0.280436 |

22

23 SCF Done: -292.560485416 A.U.

|   |           |           |           |
|---|-----------|-----------|-----------|
| N | 0.012283  | -0.623134 | 0.080588  |
| C | 1.239603  | 0.119040  | -0.233222 |
| C | 2.354791  | -0.888369 | -0.504006 |
| H | 2.092878  | -1.552936 | -1.331500 |
| H | 3.281564  | -0.375603 | -0.767599 |
| H | 2.537265  | -1.502439 | 0.381043  |
| C | -1.235880 | 0.136679  | 0.235579  |
| C | -2.353006 | -0.842789 | 0.589144  |
| H | -3.289433 | -0.314633 | 0.777234  |
| H | -2.525097 | -1.543056 | -0.234223 |
| H | -2.093225 | -1.420340 | 1.477365  |
| C | -1.620873 | 0.985499  | -0.983787 |
| H | -2.560686 | 1.512967  | -0.805622 |
| H | -0.860669 | 1.733031  | -1.214719 |
| H | -1.750110 | 0.349470  | -1.864560 |
| H | -1.099807 | 0.808177  | 1.087953  |
| C | 1.619455  | 1.055375  | 0.912449  |
| H | 0.870548  | 1.832565  | 1.070943  |
| H | 1.728055  | 0.490806  | 1.841840  |
| H | 2.567293  | 1.551099  | 0.694356  |
| H | -0.130679 | -1.331861 | -0.632764 |
| H | 1.121581  | 0.732077  | -1.140803 |

25

24 SCF Done: -791.479815573 A.U.

|   |          |           |           |
|---|----------|-----------|-----------|
| N | 0.129324 | 0.163608  | -0.444570 |
| C | 1.276585 | -0.752803 | -0.239823 |
| C | 2.486339 | -0.243486 | -1.024184 |
| H | 2.931954 | 0.630189  | -0.547538 |
| H | 3.246364 | -1.025139 | -1.071669 |
| H | 2.198177 | 0.025765  | -2.040651 |
| C | 1.657756 | -1.089646 | 1.205228  |

|    |           |           |           |
|----|-----------|-----------|-----------|
| H  | 0.880112  | -1.656019 | 1.713609  |
| H  | 2.565857  | -1.695152 | 1.210654  |
| H  | 1.854703  | -0.181326 | 1.776212  |
| C  | -1.268184 | -0.258826 | -0.091210 |
| C  | -1.477930 | -1.674060 | -0.653204 |
| H  | -0.925014 | -2.427491 | -0.092563 |
| H  | -2.537209 | -1.921576 | -0.579686 |
| H  | -1.188670 | -1.728757 | -1.703750 |
| C  | -1.606863 | -0.252269 | 1.408955  |
| H  | -2.660574 | -0.504593 | 1.539903  |
| H  | -1.020000 | -0.979609 | 1.965323  |
| H  | -1.441236 | 0.731710  | 1.845790  |
| H  | 0.950832  | -1.669510 | -0.731580 |
| Cl | 0.502555  | 1.760831  | 0.247587  |
| C  | -2.220745 | 0.694270  | -0.829412 |
| H  | -2.129355 | 1.714464  | -0.458857 |
| H  | -2.002968 | 0.694091  | -1.898071 |
| H  | -3.253418 | 0.374481  | -0.682207 |

22

25 SCF Done: -752.150129285 A.U.

|    |           |           |           |
|----|-----------|-----------|-----------|
| N  | -0.002777 | 0.235531  | -0.444224 |
| C  | 1.266975  | -0.527715 | -0.493502 |
| C  | 2.357885  | 0.365036  | -1.083048 |
| H  | 2.576235  | 1.196036  | -0.409564 |
| H  | 3.278357  | -0.204079 | -1.225709 |
| H  | 2.045234  | 0.773260  | -2.044242 |
| C  | 1.751051  | -1.184109 | 0.804325  |
| H  | 0.991139  | -1.809207 | 1.266411  |
| H  | 2.618153  | -1.810012 | 0.586022  |
| H  | 2.057159  | -0.428380 | 1.528277  |
| C  | -1.273112 | -0.516041 | -0.549941 |
| C  | -1.645992 | -1.431164 | 0.620921  |
| H  | -2.635090 | -1.859355 | 0.449322  |
| H  | -0.944761 | -2.255670 | 0.735702  |
| H  | -1.679304 | -0.868388 | 1.555037  |
| H  | 1.044757  | -1.318624 | -1.216350 |
| Cl | -0.022942 | 1.361326  | 0.926458  |
| C  | -2.413246 | 0.443221  | -0.885938 |
| H  | -2.677834 | 1.056720  | -0.023531 |
| H  | -2.131198 | 1.103740  | -1.706266 |
| H  | -3.298316 | -0.123061 | -1.179939 |
| H  | -1.096442 | -1.139606 | -1.432302 |

16

26 SCF Done: -1133.08301282 A.U.

|   |           |           |           |
|---|-----------|-----------|-----------|
| N | 0.390149  | 0.000048  | -0.551746 |
| C | -1.017447 | -0.000150 | 0.023279  |
| C | -1.696009 | -1.249325 | -0.555304 |
| H | -1.295469 | -2.165333 | -0.126030 |
| H | -2.760025 | -1.203288 | -0.322096 |
| H | -1.581104 | -1.287128 | -1.638952 |
| C | -1.073384 | -0.000019 | 1.548845  |
| H | -2.116035 | -0.000109 | 1.868182  |



|    |           |           |           |
|----|-----------|-----------|-----------|
| H  | -0.591587 | -0.885970 | 1.961467  |
| H  | -0.591813 | 0.886231  | 1.961106  |
| Cl | 1.315829  | 1.424773  | -0.015501 |
| C  | -1.696410 | 1.249016  | -0.555182 |
| H  | -1.295834 | 2.165019  | -0.126090 |
| H  | -1.581984 | 1.286677  | -1.638872 |
| H  | -2.760274 | 1.202780  | -0.321487 |
| Cl | 1.316088  | -1.424558 | -0.015371 |

28

27 SCF Done: -830.798655493 A.U.

|    |           |           |           |
|----|-----------|-----------|-----------|
| N  | -0.008651 | 0.221844  | -0.434954 |
| C  | 1.334430  | -0.359526 | -0.028162 |
| C  | 2.375512  | 0.254791  | -0.982576 |
| H  | 2.478958  | 1.328084  | -0.837945 |
| H  | 3.349834  | -0.202371 | -0.803787 |
| H  | 2.089341  | 0.070581  | -2.018782 |
| C  | 1.760745  | -0.093224 | 1.427698  |
| H  | 1.101042  | -0.578133 | 2.143311  |
| H  | 2.765460  | -0.492051 | 1.578653  |
| H  | 1.788907  | 0.971516  | 1.650323  |
| C  | -1.350863 | -0.342813 | -0.009586 |
| C  | -1.503879 | -0.559277 | 1.500842  |
| H  | -2.535844 | -0.832203 | 1.729788  |
| H  | -0.863196 | -1.361598 | 1.863765  |
| H  | -1.266000 | 0.353860  | 2.047592  |
| Cl | 0.041491  | 1.972846  | -0.055359 |
| C  | -2.457289 | 0.617158  | -0.491456 |
| H  | -2.509986 | 1.524603  | 0.104411  |
| H  | -2.300998 | 0.893054  | -1.534958 |
| H  | -3.418609 | 0.109995  | -0.408962 |
| C  | 1.361729  | -1.876835 | -0.262742 |
| H  | 0.760931  | -2.421703 | 0.461430  |
| H  | 1.041316  | -2.137901 | -1.269867 |
| H  | 2.392611  | -2.210922 | -0.141615 |
| C  | -1.597648 | -1.663611 | -0.769553 |
| H  | -1.036911 | -2.503053 | -0.376321 |
| H  | -2.654487 | -1.916497 | -0.680257 |
| H  | -1.363581 | -1.546522 | -1.827784 |

50

28 SCF Done: -759.676008919 A.U.

|   |           |           |           |
|---|-----------|-----------|-----------|
| N | -1.083232 | 0.004931  | -0.167951 |
| C | -1.977118 | -1.214148 | -0.025267 |
| C | -3.416982 | -0.645983 | -0.006535 |
| C | -3.276926 | 0.756792  | -0.552250 |
| C | -1.924233 | 1.235525  | -0.005187 |
| H | -3.799867 | -0.618505 | 1.014949  |
| H | -4.088729 | 1.424451  | -0.260259 |
| C | -1.825470 | -2.118770 | -1.259887 |
| H | -0.815590 | -2.505489 | -1.373412 |
| H | -2.505891 | -2.971579 | -1.189450 |
| H | -2.070256 | -1.555965 | -2.162244 |
| C | -1.790699 | -2.037264 | 1.264814  |

|   |           |           |           |
|---|-----------|-----------|-----------|
| H | -2.591679 | -2.777662 | 1.319285  |
| H | -0.847476 | -2.577339 | 1.314007  |
| H | -1.866212 | -1.405143 | 2.150319  |
| C | -1.493813 | 2.430540  | -0.870157 |
| H | -2.317817 | 3.147857  | -0.901250 |
| H | -0.622556 | 2.960939  | -0.495637 |
| H | -1.291983 | 2.105285  | -1.890642 |
| C | -2.080360 | 1.690301  | 1.462410  |
| H | -1.126851 | 1.986194  | 1.898262  |
| H | -2.750747 | 2.550714  | 1.519411  |
| H | -2.495453 | 0.899082  | 2.086538  |
| C | 0.222447  | -0.076749 | 0.522965  |
| H | 0.055128  | -0.234835 | 1.599095  |
| C | 1.118849  | 1.188175  | 0.421043  |
| C | 1.104196  | -1.263408 | 0.030634  |
| H | 0.564273  | 2.064521  | 0.743175  |
| C | 1.658569  | 1.413241  | -1.001950 |
| C | 2.313375  | 1.024368  | 1.381429  |
| H | 0.535219  | -2.186766 | 0.047265  |
| C | 1.624541  | -1.032373 | -1.396094 |
| C | 2.297034  | -1.434011 | 0.988020  |
| H | 2.251321  | 2.333749  | -1.019943 |
| H | 0.841078  | 1.541447  | -1.708956 |
| C | 2.515173  | 0.216092  | -1.431220 |
| H | 1.955173  | 0.891774  | 2.407047  |
| H | 2.912456  | 1.940190  | 1.367295  |
| C | 3.172673  | -0.175495 | 0.962289  |
| H | 0.785507  | -0.908144 | -2.083403 |
| H | 2.187851  | -1.912807 | -1.722050 |
| H | 1.937736  | -1.624827 | 2.004264  |
| H | 2.882606  | -2.307852 | 0.685694  |
| H | 2.889290  | 0.376237  | -2.446750 |
| C | 3.699053  | 0.046053  | -0.465457 |
| H | 4.012936  | -0.290573 | 1.653307  |
| H | 4.315950  | -0.804608 | -0.772670 |
| H | 4.336951  | 0.935255  | -0.495958 |
| H | -4.098784 | -1.269804 | -0.585195 |
| H | -3.232832 | 0.742369  | -1.644047 |

36

29 SCF Done: -526.080502876 A.U.

|   |           |           |           |
|---|-----------|-----------|-----------|
| N | 0.011833  | -0.000023 | -0.177012 |
| C | -0.816200 | -1.231382 | -0.009846 |
| C | -2.198640 | -0.659082 | 0.148505  |
| C | -2.198980 | 0.657949  | 0.148508  |
| C | -0.816820 | 1.230975  | -0.009866 |
| H | -3.059903 | -1.306242 | 0.248353  |
| H | -3.060582 | 1.304660  | 0.248341  |
| C | -0.828416 | -2.143505 | -1.261209 |
| H | 0.079959  | -2.732115 | -1.364345 |
| H | -1.664456 | -2.844562 | -1.194851 |
| H | -0.956617 | -1.538502 | -2.158829 |
| C | -0.519544 | -2.091457 | 1.240024  |

|   |           |           |           |
|---|-----------|-----------|-----------|
| H | -1.278693 | -2.872514 | 1.326365  |
| H | 0.449094  | -2.586050 | 1.186994  |
| H | -0.553975 | -1.483665 | 2.143949  |
| C | -0.829512 | 2.143103  | -1.261185 |
| H | -1.666060 | 2.843562  | -1.194902 |
| H | 0.078437  | 2.732395  | -1.364214 |
| H | -0.957212 | 1.538048  | -2.158843 |
| C | -0.520679 | 2.091187  | 1.240047  |
| H | 0.447658  | 2.586382  | 1.187070  |
| H | -1.280294 | 2.871796  | 1.326335  |
| H | -0.554847 | 1.483354  | 2.143941  |
| C | 1.488113  | 0.000377  | -0.032944 |
| C | 2.107049  | -1.222492 | -0.738069 |
| H | 3.194394  | -1.147844 | -0.687797 |
| H | 1.829892  | -2.164582 | -0.272007 |
| H | 1.816244  | -1.253771 | -1.787943 |
| C | 2.106389  | 1.223723  | -0.737817 |
| H | 1.828863  | 2.165559  | -0.271439 |
| H | 3.193771  | 1.149542  | -0.687707 |
| H | 1.815472  | 1.255174  | -1.787643 |
| C | 1.995209  | 0.000349  | 1.433593  |
| H | 3.088041  | 0.000990  | 1.446921  |
| H | 1.659580  | 0.880146  | 1.976628  |
| H | 1.660591  | -0.880069 | 1.976259  |

48

30 SCF Done: -758.447382765 A.U.

|   |           |           |           |
|---|-----------|-----------|-----------|
| N | -1.118152 | 0.000014  | -0.169052 |
| C | -1.987287 | -1.221891 | -0.033450 |
| C | -3.362389 | -0.658900 | -0.276027 |
| C | -3.362457 | 0.658704  | -0.275884 |
| C | -1.987357 | 1.221811  | -0.033524 |
| H | -4.219579 | -1.307223 | -0.401046 |
| H | -4.219686 | 1.306951  | -0.401050 |
| C | -1.702049 | -2.284182 | -1.111690 |
| H | -0.763977 | -2.811077 | -0.954327 |
| H | -2.500659 | -3.030328 | -1.105716 |
| H | -1.675654 | -1.816087 | -2.095766 |
| C | -1.991672 | -1.877216 | 1.369465  |
| H | -2.767276 | -2.645038 | 1.407407  |
| H | -1.044772 | -2.356020 | 1.614463  |
| H | -2.213063 | -1.140541 | 2.141230  |
| C | -1.702293 | 2.283906  | -1.111887 |
| H | -2.501458 | 3.029461  | -1.106485 |
| H | -0.764664 | 2.811460  | -0.954207 |
| H | -1.675076 | 1.815573  | -2.095841 |
| C | -1.991751 | 1.877482  | 1.369330  |
| H | -1.044855 | 2.356371  | 1.614155  |
| H | -2.767405 | 2.645246  | 1.407166  |
| H | -2.213046 | 1.140884  | 2.141179  |
| C | 0.174893  | 0.000052  | 0.544124  |
| H | -0.001887 | 0.000093  | 1.631245  |
| C | 1.060964  | 1.241467  | 0.241486  |

|   |          |           |           |
|---|----------|-----------|-----------|
| C | 1.061061 | -1.241420 | 0.241624  |
| H | 0.500202 | 2.153713  | 0.419125  |
| C | 1.573248 | 1.239082  | -1.207950 |
| C | 2.263950 | 1.244563  | 1.202408  |
| H | 0.500332 | -2.153642 | 0.419351  |
| C | 1.573305 | -1.239182 | -1.207811 |
| C | 2.264010 | -1.244390 | 1.202535  |
| H | 2.149139 | 2.152624  | -1.388323 |
| H | 0.734887 | 1.238735  | -1.904931 |
| C | 2.444146 | -0.000036 | -1.450856 |
| H | 1.915727 | 1.272654  | 2.239727  |
| H | 2.854002 | 2.151460  | 1.037827  |
| C | 3.129158 | 0.000099  | 0.967675  |
| H | 0.734933 | -1.238999 | -1.904773 |
| H | 2.149276 | -2.152691 | -1.388070 |
| H | 1.915825 | -1.272392 | 2.239873  |
| H | 2.854143 | -2.151257 | 1.038058  |
| H | 2.806868 | -0.000094 | -2.482964 |
| C | 3.638910 | 0.000028  | -0.483284 |
| H | 3.977445 | 0.000145  | 1.658402  |
| H | 4.264511 | -0.880842 | -0.659977 |
| H | 4.264493 | 0.880894  | -0.660073 |

54

31 SCF Done: -912.165447840 A.U.

|   |           |           |           |
|---|-----------|-----------|-----------|
| N | 0.326887  | 0.000012  | -0.070993 |
| C | 1.176862  | 1.231323  | 0.122703  |
| C | 2.576388  | 0.689710  | -0.050884 |
| C | 2.576382  | -0.689701 | -0.050865 |
| C | 1.176852  | -1.231295 | 0.122710  |
| C | 0.923425  | 2.296004  | -0.960497 |
| H | -0.039505 | 2.787384  | -0.857420 |
| H | 1.689023  | 3.071695  | -0.900482 |
| H | 0.975867  | 1.837593  | -1.947837 |
| C | 1.091865  | 1.866750  | 1.532091  |
| H | 1.824629  | 2.671653  | 1.609168  |
| H | 0.112063  | 2.290518  | 1.744039  |
| H | 1.321193  | 1.132639  | 2.304129  |
| C | 0.923444  | -2.295956 | -0.960538 |
| H | 1.689118  | -3.071569 | -0.900610 |
| H | -0.039446 | -2.787410 | -0.857424 |
| H | 0.975783  | -1.837463 | -1.947849 |
| C | 1.091804  | -1.866746 | 1.532073  |
| H | 0.111892  | -2.290221 | 1.744096  |
| H | 1.824336  | -2.671871 | 1.609054  |
| H | 1.321434  | -1.132728 | 2.304113  |
| C | -1.011494 | 0.000009  | 0.564427  |
| H | -0.894555 | -0.000003 | 1.659044  |
| C | -1.883228 | -1.240572 | 0.215916  |
| C | -1.883258 | 1.240575  | 0.215959  |
| H | -1.337203 | -2.154375 | 0.425679  |
| C | -2.319505 | -1.239128 | -1.258253 |
| C | -3.135595 | -1.242829 | 1.112305  |

|   |           |           |           |
|---|-----------|-----------|-----------|
| H | -1.337261 | 2.154382  | 0.425761  |
| C | -2.319543 | 1.239186  | -1.258207 |
| C | -3.135620 | 1.242760  | 1.112356  |
| H | -2.885960 | -2.152446 | -1.467066 |
| H | -1.447246 | -1.240356 | -1.912312 |
| C | -3.175904 | 0.000021  | -1.546969 |
| H | -2.842337 | -1.270060 | 2.166501  |
| H | -3.714376 | -2.150877 | 0.917260  |
| C | -3.988090 | -0.000039 | 0.831639  |
| H | -1.447290 | 1.240484  | -1.912277 |
| H | -2.886032 | 2.152497  | -1.466963 |
| H | -2.842360 | 1.269951  | 2.166553  |
| H | -3.714424 | 2.150802  | 0.917356  |
| H | -3.483232 | 0.000026  | -2.596817 |
| C | -4.420375 | -0.000013 | -0.644156 |
| H | -4.871579 | -0.000057 | 1.476673  |
| H | -5.035655 | 0.880849  | -0.853727 |
| H | -5.035627 | -0.880886 | -0.853765 |
| C | 3.767932  | -1.398479 | -0.160755 |
| C | 3.767957  | 1.398452  | -0.160789 |
| C | 4.964322  | -0.697415 | -0.276310 |
| C | 4.964332  | 0.697360  | -0.276332 |
| H | 3.774450  | -2.481432 | -0.155255 |
| H | 5.898914  | -1.236843 | -0.366526 |
| H | 5.898929  | 1.236777  | -0.366562 |
| H | 3.774517  | 2.481406  | -0.155333 |

66

32 SCF Done: -1069.45936079 A.U.

|   |           |           |           |
|---|-----------|-----------|-----------|
| N | 0.168500  | 0.027284  | -0.148032 |
| C | 1.043900  | 1.259347  | 0.040868  |
| C | 2.434775  | 0.687631  | -0.141630 |
| C | 2.405785  | -0.689128 | -0.223445 |
| C | 1.010490  | -1.232178 | 0.005839  |
| C | 0.739256  | 2.269833  | -1.103864 |
| H | -0.303940 | 2.555686  | -1.049278 |
| H | 0.847560  | 1.716105  | -2.038628 |
| C | 1.058243  | 1.919991  | 1.465684  |
| H | 2.002188  | 2.464263  | 1.520588  |
| H | 1.154829  | 1.114741  | 2.196342  |
| C | 0.741775  | -2.303326 | -1.115462 |
| H | 1.717710  | -2.622273 | -1.477502 |
| H | 0.294694  | -1.764308 | -1.950292 |
| C | 0.942773  | -1.814588 | 1.455005  |
| H | -0.033696 | -2.268323 | 1.612500  |
| H | 0.996557  | -0.973689 | 2.147479  |
| C | -1.176601 | 0.055330  | 0.483345  |
| H | -1.058437 | 0.128719  | 1.574896  |
| C | -2.048113 | -1.206349 | 0.234449  |
| C | -2.075696 | 1.254851  | 0.058187  |
| H | -1.488479 | -2.094758 | 0.491271  |
| C | -2.539676 | -1.319444 | -1.218850 |
| C | -3.277046 | -1.159359 | 1.163608  |

|   |           |           |           |
|---|-----------|-----------|-----------|
| H | -1.543046 | 2.186224  | 0.181273  |
| C | -2.549595 | 1.143203  | -1.399530 |
| C | -3.306102 | 1.315656  | 0.982682  |
| H | -3.111693 | -2.246054 | -1.331320 |
| H | -1.698535 | -1.374371 | -1.908333 |
| C | -3.411554 | -0.111758 | -1.574424 |
| H | -2.956481 | -1.108637 | 2.208830  |
| H | -3.847478 | -2.086237 | 1.048343  |
| C | -4.153992 | 0.050318  | 0.819537  |
| H | -1.692167 | 1.096021  | -2.072675 |
| H | -3.120211 | 2.040456  | -1.660413 |
| H | -2.992360 | 1.423306  | 2.025487  |
| H | -3.896200 | 2.203292  | 0.734442  |
| H | -3.747779 | -0.190463 | -2.612417 |
| C | -4.629418 | -0.054927 | -0.638673 |
| H | -5.017753 | 0.088762  | 1.489690  |
| H | -5.257299 | 0.805922  | -0.889924 |
| H | -5.243377 | -0.951780 | -0.769641 |
| C | 3.582831  | -1.406059 | -0.434689 |
| C | 3.653676  | 1.365037  | -0.186442 |
| C | 4.794276  | -0.732388 | -0.521902 |
| C | 4.830908  | 0.653022  | -0.381089 |
| H | 3.568845  | -2.484166 | -0.517869 |
| H | 5.709969  | -1.287186 | -0.683811 |
| H | 5.776633  | 1.178706  | -0.424838 |
| H | 3.701841  | 2.436048  | -0.059534 |
| C | 1.560252  | 3.561570  | -1.181734 |
| H | 2.574364  | 3.391256  | -1.538359 |
| H | 1.084302  | 4.246953  | -1.886190 |
| H | 1.622262  | 4.076222  | -0.221555 |
| C | -0.030222 | 2.889926  | 1.932723  |
| H | -0.252963 | 3.654012  | 1.186718  |
| H | -0.960126 | 2.393623  | 2.197397  |
| H | 0.322989  | 3.408299  | 2.827348  |
| C | 2.014209  | -2.831208 | 1.856900  |
| H | 2.995204  | -2.367793 | 1.953595  |
| H | 1.758408  | -3.270172 | 2.823613  |
| H | 2.105514  | -3.647532 | 1.139486  |
| C | -0.035365 | -3.599218 | -0.848979 |
| H | 0.293841  | -4.100855 | 0.060638  |
| H | -1.111069 | -3.467154 | -0.783228 |
| H | 0.147290  | -4.288572 | -1.676601 |

40

33 SCF Done: -528.495879614 A.U.

|   |           |           |           |
|---|-----------|-----------|-----------|
| N | -0.223610 | -0.199796 | -0.036884 |
| C | -1.373907 | 0.778168  | -0.057740 |
| C | -2.759871 | 0.081473  | -0.057068 |
| H | -2.856341 | -0.638100 | 0.756359  |
| H | -3.523624 | 0.846278  | 0.087043  |
| H | -2.993991 | -0.414470 | -0.998890 |
| C | -1.450347 | 1.715056  | 1.169886  |
| H | -0.568463 | 2.328981  | 1.315368  |

|   |           |           |           |
|---|-----------|-----------|-----------|
| H | -2.290549 | 2.397635  | 1.032295  |
| H | -1.628647 | 1.145431  | 2.082145  |
| C | 1.095000  | 0.139858  | 0.578420  |
| C | 1.654951  | 1.499287  | 0.065240  |
| H | 0.934312  | 2.292450  | 0.239016  |
| H | 2.514815  | 1.747337  | 0.694659  |
| C | 2.186087  | -0.895755 | 0.229971  |
| H | 2.322588  | -1.017849 | -0.838457 |
| H | 3.130204  | -0.536411 | 0.642142  |
| H | 1.995906  | -1.870998 | 0.669469  |
| C | 1.052702  | 0.171698  | 2.132103  |
| H | 0.555327  | -0.720135 | 2.512233  |
| H | 2.068220  | 0.189300  | 2.535197  |
| H | 0.536612  | 1.040952  | 2.527091  |
| C | -1.330869 | 1.637512  | -1.341775 |
| H | -0.479741 | 2.313796  | -1.357711 |
| H | -1.266159 | 0.989485  | -2.217417 |
| H | -2.236754 | 2.243274  | -1.431079 |
| C | -0.550772 | -1.590477 | -0.397221 |
| C | -0.628377 | -2.584156 | 0.778349  |
| H | -1.056175 | -3.530553 | 0.435787  |
| H | 0.345897  | -2.806071 | 1.211929  |
| H | -1.265711 | -2.191615 | 1.572050  |
| C | 0.210465  | -2.209020 | -1.592853 |
| H | -0.421398 | -2.975932 | -2.049061 |
| H | 0.417044  | -1.449392 | -2.347659 |
| H | 1.146985  | -2.690787 | -1.320736 |
| H | -1.560052 | -1.540722 | -0.775476 |
| C | 2.087196  | 1.527416  | -1.402973 |
| H | 2.203565  | 2.556645  | -1.748862 |
| H | 3.041248  | 1.022129  | -1.556636 |
| H | 1.346603  | 1.041554  | -2.038647 |

43

34 SCF Done: -567.821015876 A.U.

|   |           |           |           |
|---|-----------|-----------|-----------|
| N | 0.016001  | 0.181706  | -0.017470 |
| C | 1.016455  | -0.886610 | 0.392968  |
| C | 2.497077  | -0.388048 | 0.400986  |
| H | 2.597485  | 0.473676  | 1.063515  |
| H | 3.063817  | -1.181789 | 0.891966  |
| C | 0.786100  | -1.427658 | 1.822285  |
| H | -0.163133 | -1.945187 | 1.923720  |
| H | 1.567187  | -2.147550 | 2.073852  |
| H | 0.817999  | -0.620424 | 2.555117  |
| C | -1.449229 | 0.020827  | 0.281983  |
| C | -2.014750 | -1.359575 | -0.150953 |
| H | -1.486060 | -2.155789 | 0.366198  |
| H | -3.036631 | -1.403567 | 0.236613  |
| C | -2.280351 | 1.058196  | -0.504186 |
| H | -2.051509 | 1.043199  | -1.565761 |
| H | -3.336610 | 0.811194  | -0.386349 |
| H | -2.147480 | 2.071056  | -0.134377 |
| C | -1.840232 | 0.204042  | 1.779987  |

|   |           |           |           |
|---|-----------|-----------|-----------|
| H | -1.323743 | 1.042762  | 2.235843  |
| H | -2.913480 | 0.394055  | 1.854310  |
| H | -1.632658 | -0.680417 | 2.376069  |
| C | 1.005830  | -2.084421 | -0.586964 |
| H | 0.116894  | -2.699534 | -0.501546 |
| H | 1.081547  | -1.740525 | -1.616832 |
| H | 1.861365  | -2.732290 | -0.381056 |
| C | 0.543254  | 1.560573  | -0.154523 |
| C | 0.301389  | 2.547160  | 1.004550  |
| H | 0.892700  | 3.449719  | 0.828095  |
| H | -0.737575 | 2.856841  | 1.105898  |
| H | 0.624337  | 2.118160  | 1.954630  |
| C | 0.280347  | 2.243175  | -1.516104 |
| H | 1.066448  | 2.981886  | -1.695286 |
| H | 0.317098  | 1.508267  | -2.320973 |
| H | -0.669896 | 2.769181  | -1.574274 |
| H | 1.611783  | 1.446830  | -0.155727 |
| C | -2.051885 | -1.633643 | -1.655944 |
| H | -2.198169 | -2.698095 | -1.850586 |
| H | -2.869692 | -1.097767 | -2.139180 |
| H | -1.125026 | -1.327836 | -2.138758 |
| C | 3.180813  | -0.124592 | -0.948004 |
| H | 4.142082  | 0.368142  | -0.787678 |
| H | 3.377730  | -1.057414 | -1.476649 |
| H | 2.592273  | 0.504720  | -1.615003 |

46

35 SCF Done: -607.156820970 A.U.

|   |           |           |           |
|---|-----------|-----------|-----------|
| N | -0.777478 | 0.155450  | 0.088429  |
| C | 0.133936  | -0.956767 | 0.550043  |
| C | 1.603903  | -0.462150 | 0.820892  |
| H | 1.601458  | 0.201281  | 1.686338  |
| H | 2.119327  | -1.358272 | 1.178406  |
| C | -0.344982 | -1.556422 | 1.895230  |
| H | -1.361661 | -1.938236 | 1.809024  |
| H | 0.297254  | -2.384342 | 2.204122  |
| H | -0.331774 | -0.810315 | 2.691178  |
| C | -2.194150 | -0.099005 | -0.409347 |
| C | -2.543686 | -1.543323 | -0.819319 |
| H | -2.470736 | -2.250210 | 0.004058  |
| H | -3.583576 | -1.542763 | -1.148337 |
| H | -1.948432 | -1.900818 | -1.653826 |
| C | -2.389178 | 0.735424  | -1.694413 |
| H | -1.675498 | 0.407756  | -2.451982 |
| H | -3.398915 | 0.595695  | -2.089661 |
| H | -2.240343 | 1.797744  | -1.534055 |
| C | -3.275004 | 0.281038  | 0.632440  |
| H | -3.271408 | 1.334334  | 0.900804  |
| H | -4.261258 | 0.061288  | 0.221295  |
| H | -3.157680 | -0.303480 | 1.546490  |
| C | 0.251784  | -2.112438 | -0.467934 |
| H | -0.528438 | -2.855792 | -0.350611 |
| H | 0.233946  | -1.750010 | -1.492661 |



|   |           |           |           |
|---|-----------|-----------|-----------|
| H | 1.196286  | -2.630281 | -0.312019 |
| C | -0.706608 | 1.316396  | 0.997331  |
| C | -1.009187 | 2.701114  | 0.416331  |
| H | -0.693106 | 3.452821  | 1.144348  |
| H | -0.460211 | 2.876195  | -0.507817 |
| H | -2.066291 | 2.870663  | 0.220655  |
| H | 0.307453  | 1.374372  | 1.365776  |
| H | -1.325343 | 1.179697  | 1.893991  |
| C | 2.553380  | 0.181030  | -0.234237 |
| C | 3.846046  | 0.534086  | 0.529675  |
| H | 4.306294  | -0.357838 | 0.962867  |
| H | 4.574860  | 0.995278  | -0.141236 |
| H | 3.645532  | 1.237868  | 1.341228  |
| C | 1.996655  | 1.468419  | -0.854635 |
| H | 1.053604  | 1.280301  | -1.363653 |
| H | 1.824853  | 2.233706  | -0.096231 |
| H | 2.712632  | 1.874282  | -1.574497 |
| C | 2.941457  | -0.777176 | -1.373611 |
| H | 3.294910  | -1.736542 | -0.989264 |
| H | 2.112104  | -0.967092 | -2.052167 |
| H | 3.750314  | -0.336792 | -1.962250 |

49

36 SCF Done: -646.477918757 A.U.

|   |           |           |           |
|---|-----------|-----------|-----------|
| N | -0.778706 | 0.032676  | 0.021475  |
| C | 0.214856  | -0.874048 | 0.697447  |
| C | 1.627513  | -0.217670 | 0.886769  |
| H | 1.514842  | 0.676763  | 1.498657  |
| H | 2.158413  | -0.914021 | 1.541872  |
| C | -0.219222 | -1.265382 | 2.139752  |
| H | -1.270814 | -1.539426 | 2.177477  |
| H | 0.365265  | -2.116134 | 2.499025  |
| H | -0.064883 | -0.445592 | 2.840322  |
| C | -2.118385 | -0.444408 | -0.489207 |
| C | -2.434625 | -1.949575 | -0.319330 |
| H | -2.312693 | -2.308047 | 0.699082  |
| H | -3.482822 | -2.089963 | -0.584529 |
| H | -1.857797 | -2.577547 | -0.990481 |
| C | -2.200756 | -0.201983 | -2.015886 |
| H | -1.353658 | -0.682223 | -2.507616 |
| H | -3.120865 | -0.633260 | -2.419303 |
| H | -2.190823 | 0.850921  | -2.277374 |
| C | -3.305056 | 0.264955  | 0.204156  |
| H | -3.301157 | 1.341105  | 0.070467  |
| H | -4.241290 | -0.104121 | -0.218224 |
| H | -3.309408 | 0.051127  | 1.273866  |
| C | 0.456487  | -2.187567 | -0.082485 |
| H | -0.289085 | -2.944083 | 0.127032  |
| H | 0.489443  | -2.017828 | -1.157536 |
| H | 1.410143  | -2.610506 | 0.226643  |
| C | -0.634136 | 1.472212  | 0.336468  |
| C | -1.029992 | 2.456166  | -0.776804 |
| H | -0.656084 | 3.445473  | -0.502056 |

|   |           |           |           |
|---|-----------|-----------|-----------|
| H | -0.579771 | 2.181240  | -1.728577 |
| H | -2.104849 | 2.551353  | -0.919547 |
| H | 0.433014  | 1.621527  | 0.414786  |
| C | 2.625970  | 0.108896  | -0.274416 |
| C | 3.646291  | 1.104133  | 0.311058  |
| H | 4.153100  | 0.680858  | 1.182458  |
| H | 4.408155  | 1.359312  | -0.429633 |
| H | 3.157447  | 2.030335  | 0.623087  |
| C | 1.985994  | 0.743589  | -1.518316 |
| H | 1.146262  | 0.155071  | -1.883435 |
| H | 1.623172  | 1.750562  | -1.317774 |
| H | 2.731009  | 0.821047  | -2.314602 |
| C | 3.414157  | -1.136736 | -0.728462 |
| H | 3.819507  | -1.685218 | 0.125374  |
| H | 2.805797  | -1.822703 | -1.314701 |
| H | 4.254425  | -0.831153 | -1.357022 |
| C | -1.186953 | 1.988931  | 1.690053  |
| H | -0.698124 | 2.937498  | 1.930006  |
| H | -2.259354 | 2.172717  | 1.675192  |
| H | -0.978439 | 1.297112  | 2.501956  |

46

37 SCF Done: -682.225422523 A.U.

|   |           |           |           |
|---|-----------|-----------|-----------|
| N | 1.304677  | -0.049627 | -0.155352 |
| C | 1.993772  | -1.352315 | -0.099180 |
| C | 3.007563  | -1.509351 | -1.237206 |
| H | 3.884410  | -0.870864 | -1.115520 |
| H | 3.362135  | -2.541697 | -1.273581 |
| H | 2.541807  | -1.269174 | -2.194109 |
| H | 1.237172  | -2.108107 | -0.293129 |
| C | 2.624050  | -1.685746 | 1.263276  |
| H | 1.886165  | -1.609138 | 2.064270  |
| H | 3.018933  | -2.704428 | 1.264940  |
| H | 3.449144  | -1.009920 | 1.498489  |
| C | 2.232063  | 1.098720  | 0.016915  |
| C | 0.021079  | 0.038292  | 0.567563  |
| H | 0.196179  | 0.207218  | 1.641298  |
| C | -0.852178 | -1.239716 | 0.472277  |
| C | -0.848269 | 1.218201  | 0.051879  |
| H | -0.296524 | -2.100677 | 0.844650  |
| C | -1.308252 | -1.492446 | -0.974987 |
| C | -2.092112 | -1.072930 | 1.369602  |
| H | -0.275866 | 2.141883  | 0.098128  |
| C | -1.293000 | 0.968607  | -1.397313 |
| C | -2.086395 | 1.379289  | 0.949270  |
| H | -1.895777 | -2.415156 | -1.016781 |
| H | -0.445635 | -1.626149 | -1.631269 |
| C | -2.151145 | -0.303896 | -1.464197 |
| H | -1.784703 | -0.916525 | 2.408236  |
| H | -2.678676 | -1.996589 | 1.344715  |
| C | -2.943321 | 0.108505  | 0.887452  |
| H | -0.417479 | 0.863064  | -2.039767 |
| H | -1.865413 | 1.829429  | -1.757666 |

|   |           |           |           |
|---|-----------|-----------|-----------|
| H | -1.779744 | 1.576568  | 1.981581  |
| H | -2.667282 | 2.244995  | 0.616333  |
| H | -2.469431 | -0.480473 | -2.495830 |
| C | -3.387592 | -0.141029 | -0.563796 |
| H | -3.822117 | 0.219365  | 1.529434  |
| H | -3.999626 | 0.695301  | -0.916487 |
| H | -4.009892 | -1.040321 | -0.614832 |
| H | 3.235375  | 0.677550  | -0.031804 |
| C | 2.176296  | 1.819577  | 1.373632  |
| H | 1.250305  | 2.375233  | 1.522774  |
| H | 2.286717  | 1.117403  | 2.200675  |
| H | 2.999370  | 2.534899  | 1.431005  |
| C | 2.155964  | 2.089396  | -1.152560 |
| H | 1.213980  | 2.636273  | -1.174865 |
| H | 2.965300  | 2.821207  | -1.080045 |
| H | 2.257281  | 1.557274  | -2.099142 |

61

38 SCF Done: -953.896448974 A.U.

|   |           |           |           |
|---|-----------|-----------|-----------|
| N | 0.076433  | 0.932460  | -0.036276 |
| C | -0.149661 | 2.391193  | -0.070668 |
| C | -0.937918 | 2.912786  | -1.274827 |
| H | -2.004655 | 2.713777  | -1.213489 |
| H | -0.816512 | 3.996990  | -1.339904 |
| H | -0.558709 | 2.469388  | -2.196515 |
| H | 0.849983  | 2.795035  | -0.226933 |
| C | -0.621038 | 3.044166  | 1.245054  |
| H | -0.064525 | 2.646310  | 2.095704  |
| H | -0.439724 | 4.121213  | 1.202548  |
| H | -1.681736 | 2.900323  | 1.436117  |
| C | 1.465858  | 0.682896  | 0.441847  |
| H | 1.675386  | 1.414212  | 1.235979  |
| C | 2.504579  | 0.940147  | -0.687277 |
| C | 1.812533  | -0.688118 | 1.073466  |
| H | 2.262639  | 1.877938  | -1.191116 |
| C | 2.485555  | -0.196009 | -1.719417 |
| C | 3.906711  | 1.053706  | -0.066242 |
| H | 1.105443  | -0.919183 | 1.873401  |
| C | 1.846711  | -1.835422 | 0.044911  |
| C | 3.217293  | -0.572893 | 1.704890  |
| H | 3.180814  | 0.035323  | -2.532572 |
| H | 1.488152  | -0.275257 | -2.158583 |
| C | 2.877052  | -1.521510 | -1.048619 |
| H | 3.931795  | 1.877043  | 0.654865  |
| H | 4.641388  | 1.285016  | -0.843793 |
| C | 4.268308  | -0.268241 | 0.625681  |
| H | 0.871252  | -1.991832 | -0.412572 |
| H | 2.109544  | -2.766858 | 0.556442  |
| H | 3.224020  | 0.210335  | 2.468563  |
| H | 3.460774  | -1.513681 | 2.208078  |
| H | 2.878227  | -2.325516 | -1.790361 |
| C | 4.273738  | -1.397098 | -0.418570 |
| H | 5.256077  | -0.188398 | 1.088856  |

|   |           |           |           |
|---|-----------|-----------|-----------|
| H | 4.556259  | -2.343924 | 0.052772  |
| H | 5.019000  | -1.186286 | -1.192145 |
| C | -0.954027 | -0.086150 | 0.245407  |
| H | -0.408599 | -0.862080 | 0.764927  |
| C | -1.537131 | -0.814869 | -1.001905 |
| C | -2.140527 | 0.201342  | 1.211619  |
| H | -0.728942 | -0.955506 | -1.722655 |
| C | -2.696990 | -0.060613 | -1.666743 |
| C | -2.064791 | -2.187010 | -0.532522 |
| H | -1.777504 | 0.757292  | 2.076696  |
| C | -3.315011 | 0.943811  | 0.550765  |
| C | -2.669048 | -1.171437 | 1.688428  |
| H | -3.063682 | -0.642296 | -2.519211 |
| H | -2.359208 | 0.893498  | -2.065360 |
| C | -3.837470 | 0.146133  | -0.655268 |
| H | -1.255833 | -2.773968 | -0.087282 |
| H | -2.438047 | -2.756700 | -1.389464 |
| C | -3.193507 | -1.986204 | 0.492913  |
| H | -3.028985 | 1.944455  | 0.237095  |
| H | -4.117343 | 1.068939  | 1.285579  |
| H | -1.874538 | -1.722537 | 2.200874  |
| H | -3.474247 | -1.022032 | 2.414910  |
| H | -4.654224 | 0.697793  | -1.130008 |
| C | -4.347740 | -1.221174 | -0.174152 |
| H | -3.549328 | -2.959658 | 0.843265  |
| H | -5.170310 | -1.086829 | 0.535624  |
| H | -4.740010 | -1.796158 | -1.019009 |

68

39 SCF Done: -1070.68189454 A.U.

|   |          |           |           |
|---|----------|-----------|-----------|
| N | 0.094691 | 0.430284  | -0.005380 |
| C | 1.512921 | 0.411363  | 0.451420  |
| H | 1.609264 | 1.167811  | 1.243610  |
| C | 2.479402 | 0.837227  | -0.690638 |
| C | 2.089948 | -0.882401 | 1.077077  |
| H | 2.076102 | 1.720586  | -1.189564 |
| C | 2.638434 | -0.287155 | -1.723202 |
| C | 3.849895 | 1.184792  | -0.086339 |
| H | 1.439948 | -1.227345 | 1.884490  |
| C | 2.304289 | -2.008797 | 0.047499  |
| C | 3.463402 | -0.533287 | 1.691675  |
| H | 3.275620 | 0.056035  | -2.544405 |
| H | 1.663423 | -0.532604 | -2.150784 |
| C | 3.254021 | -1.527781 | -1.058125 |
| H | 3.745192 | 2.001526  | 0.635151  |
| H | 4.526524 | 1.534988  | -0.872092 |
| C | 4.435640 | -0.057442 | 0.600073  |
| H | 1.363941 | -2.328169 | -0.398155 |
| H | 2.726309 | -2.882031 | 0.555177  |
| H | 3.348264 | 0.240626  | 2.456190  |
| H | 3.867360 | -1.419613 | 2.190506  |
| H | 3.380823 | -2.320989 | -1.800685 |
| C | 4.617812 | -1.170297 | -0.445363 |

|   |           |           |           |
|---|-----------|-----------|-----------|
| H | 5.401443  | 0.187084  | 1.051806  |
| H | 5.061226  | -2.055798 | 0.021245  |
| H | 5.307395  | -0.838067 | -1.227932 |
| C | -0.747264 | -0.750540 | 0.265686  |
| H | -0.080729 | -1.425305 | 0.786035  |
| C | -1.191805 | -1.559416 | -0.989275 |
| C | -1.971266 | -0.673842 | 1.224755  |
| H | -0.367081 | -1.557948 | -1.704809 |
| C | -2.455910 | -1.002341 | -1.658631 |
| C | -1.486389 | -3.003492 | -0.532849 |
| H | -1.711101 | -0.071955 | 2.096241  |
| C | -3.249812 | -0.133533 | 0.560286  |
| C | -2.265744 | -2.118966 | 1.688831  |
| H | -2.714553 | -1.628330 | -2.519288 |
| H | -2.277531 | -0.001181 | -2.045742 |
| C | -3.622405 | -0.997336 | -0.655583 |
| H | -0.594004 | -3.450577 | -0.084608 |
| H | -1.753264 | -3.621045 | -1.396363 |
| C | -2.639634 | -3.001010 | 0.484675  |
| H | -3.133499 | 0.903601  | 0.256697  |
| H | -4.066499 | -0.151534 | 1.289768  |
| H | -1.393417 | -2.533678 | 2.203256  |
| H | -3.088875 | -2.111396 | 2.410503  |
| H | -4.516367 | -0.586045 | -1.133635 |
| C | -3.900512 | -2.434416 | -0.187709 |
| H | -2.830780 | -4.022633 | 0.826353  |
| H | -4.739336 | -2.444826 | 0.515654  |
| H | -4.184581 | -3.060552 | -1.039486 |
| C | -0.367401 | 1.829524  | -0.029978 |
| C | -1.228263 | 2.243087  | -1.230998 |
| C | -0.941919 | 2.402238  | 1.284830  |
| H | 0.553572  | 2.396783  | -0.180389 |
| C | -1.358234 | 3.769755  | -1.302908 |
| H | -2.227458 | 1.814610  | -1.168456 |
| H | -0.770448 | 1.854242  | -2.143565 |
| C | -1.060611 | 3.928394  | 1.202085  |
| H | -1.928170 | 1.989702  | 1.491837  |
| H | -0.295360 | 2.115170  | 2.118436  |
| C | -1.911219 | 4.351426  | 0.001243  |
| H | -1.998186 | 4.049282  | -2.144195 |
| H | -0.372521 | 4.207095  | -1.500487 |
| H | -1.487849 | 4.323285  | 2.127994  |
| H | -0.060137 | 4.366382  | 1.106179  |
| H | -1.964156 | 5.441705  | -0.062593 |
| H | -2.937607 | 3.994593  | 0.146543  |

53

40 SCF Done: -799.005825647 A.U.

|   |          |          |          |
|---|----------|----------|----------|
| N | 0.513493 | 0.582188 | 0.198445 |
| C | 0.692281 | 2.036520 | 0.341199 |
| C | 1.713863 | 2.412023 | 1.416720 |
| H | 2.736212 | 2.168690 | 1.129702 |
| H | 1.671814 | 3.489796 | 1.589029 |

|   |           |           |           |
|---|-----------|-----------|-----------|
| H | 1.490573  | 1.905334  | 2.356289  |
| H | -0.256916 | 2.398414  | 0.730059  |
| C | 0.946426  | 2.843495  | -0.953312 |
| H | 0.677708  | 3.890047  | -0.787541 |
| H | 1.989217  | 2.817567  | -1.264738 |
| H | 0.339900  | 2.472125  | -1.780435 |
| C | -0.682227 | 0.146045  | -0.557407 |
| H | -0.441671 | 0.106328  | -1.634560 |
| C | -1.921149 | 1.069009  | -0.416836 |
| C | -1.141894 | -1.281800 | -0.137853 |
| H | -1.665335 | 2.089016  | -0.701917 |
| C | -2.479145 | 1.056660  | 1.018648  |
| C | -3.019708 | 0.578871  | -1.379622 |
| H | -0.304117 | -1.976467 | -0.198387 |
| C | -1.680401 | -1.284079 | 1.300674  |
| C | -2.237785 | -1.769859 | -1.099731 |
| H | -3.332863 | 1.739183  | 1.078990  |
| H | -1.730893 | 1.413078  | 1.729537  |
| C | -2.907993 | -0.367444 | 1.398635  |
| H | -2.653106 | 0.603599  | -2.410394 |
| H | -3.873207 | 1.261837  | -1.326740 |
| C | -3.457855 | -0.844238 | -1.008683 |
| H | -0.901188 | -0.942379 | 1.984986  |
| H | -1.946696 | -2.306195 | 1.588105  |
| H | -1.856072 | -1.790879 | -2.125489 |
| H | -2.520522 | -2.795075 | -0.841456 |
| H | -3.294879 | -0.373754 | 2.421876  |
| C | -3.999557 | -0.854621 | 0.430837  |
| H | -4.235746 | -1.183653 | -1.698862 |
| H | -4.317807 | -1.866077 | 0.702928  |
| H | -4.880257 | -0.208458 | 0.504075  |
| C | 1.689387  | -0.270771 | -0.079705 |
| C | 2.749234  | 0.262314  | -1.063351 |
| C | 2.357831  | -0.801167 | 1.200787  |
| H | 1.293119  | -1.155636 | -0.578499 |
| C | 3.791119  | -0.818465 | -1.377344 |
| H | 3.263045  | 1.129392  | -0.643803 |
| H | 2.264635  | 0.590346  | -1.984992 |
| C | 3.406270  | -1.871858 | 0.882084  |
| H | 2.836386  | 0.016174  | 1.743574  |
| H | 1.582928  | -1.204729 | 1.856152  |
| C | 4.453641  | -1.350211 | -0.104480 |
| H | 4.545677  | -0.418858 | -2.060456 |
| H | 3.303131  | -1.648718 | -1.901178 |
| H | 3.886267  | -2.213796 | 1.803088  |
| H | 2.908317  | -2.745994 | 0.445668  |
| H | 5.171954  | -2.137070 | -0.350430 |
| H | 5.021923  | -0.541058 | 0.369139  |

40

41 SCF Done: -1063.16516181 A.U.

|   |          |           |           |
|---|----------|-----------|-----------|
| N | 1.292644 | 0.229449  | -0.335611 |
| C | 2.529691 | -0.573332 | -0.000471 |

|    |           |           |           |
|----|-----------|-----------|-----------|
| C  | 3.685241  | -0.076425 | -0.880034 |
| H  | 4.021229  | 0.917477  | -0.592317 |
| H  | 4.532201  | -0.757267 | -0.784220 |
| H  | 3.377853  | -0.049733 | -1.926439 |
| C  | 2.925548  | -0.496529 | 1.482647  |
| H  | 2.139887  | -0.883905 | 2.132847  |
| H  | 3.821892  | -1.094312 | 1.654581  |
| H  | 3.141223  | 0.529687  | 1.777768  |
| C  | 0.030124  | -0.257847 | 0.314690  |
| H  | 0.319643  | -0.935749 | 1.121093  |
| C  | -0.796438 | -1.065205 | -0.720461 |
| C  | -0.915256 | 0.775769  | 0.971355  |
| H  | -0.145340 | -1.761047 | -1.244432 |
| C  | -1.455568 | -0.131165 | -1.745492 |
| C  | -1.876989 | -1.854525 | 0.039324  |
| H  | -0.349918 | 1.379691  | 1.681392  |
| C  | -1.622060 | 1.683632  | -0.052371 |
| C  | -1.995371 | -0.018454 | 1.736911  |
| H  | -1.988236 | -0.731190 | -2.489482 |
| H  | -0.685170 | 0.434811  | -2.275440 |
| C  | -2.425671 | 0.827949  | -1.039693 |
| H  | -1.410522 | -2.535620 | 0.758387  |
| H  | -2.442381 | -2.471278 | -0.665527 |
| C  | -2.816660 | -0.878543 | 0.762072  |
| H  | -0.903255 | 2.296179  | -0.594333 |
| H  | -2.285923 | 2.368402  | 0.484751  |
| H  | -1.531488 | -0.651804 | 2.499032  |
| H  | -2.650473 | 0.684363  | 2.259829  |
| H  | -2.906599 | 1.475206  | -1.778464 |
| C  | -3.495295 | 0.027851  | -0.278583 |
| H  | -3.575142 | -1.437540 | 1.317207  |
| H  | -4.190919 | 0.712586  | 0.216548  |
| H  | -4.081014 | -0.579212 | -0.976115 |
| Cl | 1.637858  | 1.952245  | -0.003242 |
| C  | 2.266832  | -2.040764 | -0.381103 |
| H  | 1.481318  | -2.499713 | 0.216952  |
| H  | 2.007974  | -2.132037 | -1.435773 |
| H  | 3.182295  | -2.606771 | -0.206187 |

49

42 SCF Done: -721.536758970 A.U.

|   |           |           |           |
|---|-----------|-----------|-----------|
| N | 1.259860  | 0.146096  | -0.232535 |
| C | 2.210747  | -1.030698 | -0.048857 |
| C | 3.684933  | -0.663376 | -0.331616 |
| H | 4.115157  | -0.003201 | 0.421774  |
| H | 4.269104  | -1.584008 | -0.317375 |
| H | 3.813337  | -0.212088 | -1.316984 |
| C | 2.198018  | -1.620812 | 1.380320  |
| H | 1.233023  | -2.026601 | 1.673983  |
| H | 2.924073  | -2.433481 | 1.446417  |
| H | 2.479666  | -0.864288 | 2.113709  |
| C | -0.040523 | 0.032494  | 0.493337  |
| H | 0.156690  | 0.050038  | 1.575293  |

|   |           |           |           |
|---|-----------|-----------|-----------|
| C | -0.857197 | -1.265243 | 0.222975  |
| C | -1.027317 | 1.205756  | 0.221487  |
| H | -0.241662 | -2.141852 | 0.389507  |
| C | -1.421098 | -1.304109 | -1.206812 |
| C | -2.023936 | -1.346600 | 1.225730  |
| H | -0.533679 | 2.156282  | 0.385585  |
| C | -1.592294 | 1.166561  | -1.207760 |
| C | -2.194471 | 1.128834  | 1.224027  |
| H | -1.938374 | -2.256052 | -1.365256 |
| H | -0.611424 | -1.248366 | -1.935315 |
| C | -2.384208 | -0.129418 | -1.419294 |
| H | -1.638171 | -1.346518 | 2.250173  |
| H | -2.551863 | -2.294609 | 1.082733  |
| C | -2.982814 | -0.169174 | 1.021310  |
| H | -0.784781 | 1.223137  | -1.937637 |
| H | -2.235937 | 2.038256  | -1.365368 |
| H | -1.812808 | 1.183302  | 2.248496  |
| H | -2.847090 | 1.995480  | 1.079098  |
| H | -2.781927 | -0.157575 | -2.438070 |
| C | -3.541667 | -0.209183 | -0.410682 |
| H | -3.804151 | -0.225356 | 1.741792  |
| H | -4.232385 | 0.625822  | -0.566364 |
| H | -4.110572 | -1.131762 | -0.564778 |
| C | 1.896165  | -2.127667 | -1.091327 |
| H | 0.920168  | -2.582444 | -0.974105 |
| H | 1.949518  | -1.701230 | -2.094075 |
| H | 2.635132  | -2.928928 | -1.019635 |
| C | 1.914136  | 1.479884  | -0.101856 |
| H | 2.949199  | 1.314741  | -0.356528 |
| C | 1.956138  | 2.083117  | 1.314826  |
| H | 0.976675  | 2.372967  | 1.693806  |
| H | 2.392275  | 1.379454  | 2.025057  |
| H | 2.582168  | 2.978472  | 1.308623  |
| C | 1.487453  | 2.512919  | -1.160105 |
| H | 0.519208  | 2.975220  | -0.984561 |
| H | 2.229192  | 3.316089  | -1.180613 |
| H | 1.468815  | 2.046721  | -2.145858 |

47

43 SCF Done: -720.319430687 A.U.

|   |          |           |           |
|---|----------|-----------|-----------|
| N | 1.218997 | 0.157672  | -0.142479 |
| C | 2.209415 | -0.983647 | -0.015923 |
| C | 3.618762 | -0.517469 | -0.433573 |
| H | 4.000875 | 0.280010  | 0.199582  |
| H | 4.301092 | -1.364409 | -0.354176 |
| H | 3.632936 | -0.180365 | -1.469973 |
| C | 2.307588 | -1.525404 | 1.422533  |
| H | 1.354807 | -1.904286 | 1.789797  |
| H | 3.025919 | -2.346737 | 1.460928  |
| H | 2.652718 | -0.749532 | 2.106682  |
| C | 1.819114 | 1.456516  | 0.103934  |
| C | 2.087011 | 2.269574  | -1.130896 |
| C | 2.061520 | 1.938039  | 1.322004  |



|   |           |           |           |
|---|-----------|-----------|-----------|
| H | 1.140123  | 2.521955  | -1.615171 |
| H | 1.830149  | 1.382002  | 2.219920  |
| C | -0.094357 | 0.051148  | 0.558593  |
| H | 0.071082  | 0.089599  | 1.644745  |
| C | -0.918093 | -1.233553 | 0.291643  |
| C | -1.014850 | 1.252348  | 0.199302  |
| H | -0.325560 | -2.113924 | 0.525830  |
| C | -1.418043 | -1.309582 | -1.160688 |
| C | -2.134741 | -1.235917 | 1.239246  |
| H | -0.469112 | 2.182543  | 0.346665  |
| C | -1.501936 | 1.170944  | -1.256848 |
| C | -2.230892 | 1.251988  | 1.141360  |
| H | -1.965981 | -2.246292 | -1.305261 |
| H | -0.578880 | -1.314553 | -1.855612 |
| C | -2.324478 | -0.108378 | -1.462453 |
| H | -1.799026 | -1.209041 | 2.280612  |
| H | -2.689316 | -2.169806 | 1.105913  |
| C | -3.042834 | -0.034986 | 0.944710  |
| H | -0.650516 | 1.173949  | -1.939583 |
| H | -2.107361 | 2.054017  | -1.484840 |
| H | -1.900320 | 1.335425  | 2.181406  |
| H | -2.853388 | 2.127341  | 0.931575  |
| H | -2.672446 | -0.162092 | -2.498216 |
| C | -3.532245 | -0.111391 | -0.511120 |
| H | -3.899955 | -0.042760 | 1.624401  |
| H | -4.185598 | 0.738938  | -0.731307 |
| H | -4.124042 | -1.020297 | -0.660028 |
| C | 1.863074  | -2.122580 | -0.994522 |
| H | 0.953625  | -2.656755 | -0.741699 |
| H | 1.759192  | -1.725060 | -2.004612 |
| H | 2.674674  | -2.853130 | -0.997533 |
| H | 2.483514  | 2.926158  | 1.454979  |
| H | 2.617330  | 3.194834  | -0.901639 |
| H | 2.666396  | 1.702671  | -1.859839 |

4

NH3 SCF Done: -56.5901966466 A.U.

|   |           |           |           |
|---|-----------|-----------|-----------|
| N | 0.000000  | 0.000000  | 0.114997  |
| H | 0.000000  | 0.939606  | -0.268327 |
| H | -0.813723 | -0.469803 | -0.268327 |
| H | 0.813723  | -0.469803 | -0.268327 |

13

NMe3 SCF Done: -174.552269352 A.U.

|   |           |           |           |
|---|-----------|-----------|-----------|
| N | 0.000008  | -0.000061 | -0.377391 |
| C | -0.049326 | 1.386625  | 0.060850  |
| H | 0.815954  | 1.929551  | -0.323414 |
| H | -0.052622 | 1.484367  | 1.161584  |
| C | 1.225596  | -0.650596 | 0.060876  |
| H | 1.263181  | -1.671380 | -0.323405 |
| H | 1.312082  | -0.696487 | 1.161584  |
| C | -1.176283 | -0.736005 | 0.060877  |
| H | -1.259374 | -0.787760 | 1.161591  |
| H | -2.079006 | -0.258030 | -0.323526 |

H -1.140962 -1.757308 -0.322697  
H -0.951521 1.866579 -0.322730  
H 2.092288 -0.109249 -0.322871

22

NEt3 SCF Done: -292.546375710 A.U.

N 0.000180 -0.000030 0.009335  
C -0.375495 1.350561 0.438160  
H 0.511322 1.982806 0.385604  
H -0.689825 1.350721 1.496706  
C -1.461853 1.975845 -0.430040  
H -2.387683 1.398618 -0.408877  
H -1.693884 2.983668 -0.078483  
H -1.127826 2.038681 -1.467179  
C 1.357629 -0.349615 0.438716  
H 1.461624 -1.433834 0.387725  
H 1.514941 -0.075961 1.496851  
C 2.442329 0.277142 -0.430464  
H 2.404582 1.367574 -0.411948  
H 3.431233 -0.024404 -0.077952  
H 2.330211 -0.046101 -1.466841  
C -0.981266 -1.000689 0.439067  
H -0.822307 -1.274058 1.497025  
H -1.972212 -0.548573 0.388850  
C -0.981426 -2.253226 -0.430434  
H -0.018262 -2.765892 -0.412434  
H -1.736951 -2.958850 -0.077718  
H -1.205731 -1.994291 -1.466699

12

Py SCF Done: -248.38765066 A.U.

N -0.000131 -1.414139 -0.000093  
C -1.141566 -0.719447 -0.000216  
C -1.194357 0.670161 -0.000122  
C 0.000130 1.379561 0.000096  
C 1.194482 0.669951 0.000212  
C 1.141433 -0.719646 0.000125  
H 0.000199 2.462128 0.000172  
H -2.057474 -1.300931 -0.000373  
H -2.149543 1.178007 -0.000241  
H 2.149781 1.177586 0.000348  
H 2.057227 -1.301305 0.000184  
H -0.000219 -2.414138 -0.000161

29

1H+ SCF Done: -371.659699457 A.U.

N 0.019883 0.199607 0.205971  
C 0.006493 1.503081 -0.566761  
C 1.217453 2.381280 -0.312685  
H -0.898553 2.028131 -0.273422  
H -0.078574 1.238619 -1.617711  
H 1.064471 3.321795 -0.841778  
H 1.333358 2.611705 0.747401  
H 2.141351 1.941700 -0.683948  
C 1.209634 -0.711176 -0.228577

|   |           |           |           |
|---|-----------|-----------|-----------|
| C | 0.844897  | -2.171654 | -0.452319 |
| H | 1.540092  | -0.286619 | -1.174431 |
| H | 1.743378  | -2.668390 | -0.819292 |
| H | 0.552922  | -2.669607 | 0.472214  |
| H | 0.068751  | -2.314236 | -1.199805 |
| C | -1.376397 | -0.449213 | 0.265159  |
| C | -2.217390 | 0.260983  | 1.318415  |
| H | -1.190189 | -1.460146 | 0.613441  |
| H | -3.166816 | -0.265699 | 1.411579  |
| H | -1.733273 | 0.245330  | 2.296597  |
| H | -2.439064 | 1.293792  | 1.049389  |
| C | -2.054682 | -0.492097 | -1.096269 |
| H | -2.917009 | -1.153849 | -1.021464 |
| H | -2.416526 | 0.489342  | -1.400508 |
| H | -1.405544 | -0.879645 | -1.879461 |
| C | 2.311821  | -0.587422 | 0.817863  |
| H | 2.610572  | 0.443685  | 0.995853  |
| H | 1.992941  | -1.030485 | 1.764314  |
| H | 3.189863  | -1.133094 | 0.474340  |
| H | 0.217699  | 0.447729  | 1.175933  |

18

2H+ SCF Done: -252.468169751 A.U.

|   |           |           |           |
|---|-----------|-----------|-----------|
| C | -1.485419 | 0.080352  | 0.225356  |
| C | -0.676656 | 1.297822  | -0.228934 |
| C | 0.765435  | 1.220102  | 0.245093  |
| C | 0.628231  | -1.294508 | 0.243419  |
| C | -0.814834 | -1.218786 | -0.227930 |
| H | 1.377861  | 2.030645  | -0.144076 |
| H | -0.691484 | 1.372922  | -1.320196 |
| H | -1.108189 | 2.221808  | 0.157036  |
| H | -1.570987 | 0.085107  | 1.316001  |
| H | -2.497683 | 0.135998  | -0.175399 |
| H | 1.151091  | -2.165746 | -0.144337 |
| H | 0.697268  | -1.294008 | 1.330494  |
| H | -0.844535 | -1.298681 | -1.318693 |
| H | -1.341319 | -2.088914 | 0.165531  |
| H | 0.836531  | 1.213280  | 1.332072  |
| N | 1.387603  | -0.074401 | -0.226123 |
| H | 1.421528  | -0.073454 | -1.248447 |
| H | 2.356158  | -0.128051 | 0.090846  |

30

3H+ SCF Done: -409.800943853 A.U.

|   |           |           |           |
|---|-----------|-----------|-----------|
| C | -0.000050 | 1.952786  | 0.074589  |
| C | 1.256021  | 1.250608  | -0.438569 |
| C | 1.348223  | -0.224413 | -0.031686 |
| C | -1.348256 | -0.224409 | -0.031680 |
| C | -1.256047 | 1.250563  | -0.438673 |
| H | 1.279340  | 1.318881  | -1.530440 |
| H | 2.156851  | 1.746108  | -0.074378 |
| H | -0.000104 | 2.000894  | 1.164782  |
| H | -0.000049 | 2.985623  | -0.275190 |
| H | -1.279244 | 1.318736  | -1.530557 |

|   |           |           |           |
|---|-----------|-----------|-----------|
| H | -2.156928 | 1.746074  | -0.074616 |
| N | 0.000026  | -0.887112 | -0.397451 |
| H | -0.000014 | -0.987460 | -1.414439 |
| C | -1.641087 | -0.413427 | 1.455498  |
| H | -2.675682 | -0.123392 | 1.634507  |
| H | -1.534378 | -1.457638 | 1.753568  |
| H | -1.014989 | 0.197309  | 2.097747  |
| C | -2.401483 | -0.962268 | -0.859643 |
| H | -2.193908 | -0.896667 | -1.929225 |
| H | -2.467441 | -2.014552 | -0.576671 |
| H | -3.374392 | -0.505362 | -0.682668 |
| C | 2.401535  | -0.962148 | -0.859663 |
| H | 2.467582  | -2.014430 | -0.576703 |
| H | 2.193962  | -0.896556 | -1.929233 |
| H | 3.374405  | -0.505153 | -0.682658 |
| C | 1.641100  | -0.413526 | 1.455472  |
| H | 1.015113  | 0.197277  | 2.097754  |
| H | 1.534204  | -1.457723 | 1.753484  |
| H | 2.675745  | -0.123671 | 1.634459  |
| H | 0.000012  | -1.841115 | -0.031240 |

21

4H+ SCF Done: -291.795089078 A.U.

|   |           |           |           |
|---|-----------|-----------|-----------|
| C | -1.909491 | 0.000012  | 0.269147  |
| C | -1.184917 | 1.255652  | -0.216099 |
| C | 0.277891  | 1.249935  | 0.197697  |
| C | 0.277911  | -1.249945 | 0.197652  |
| C | -1.184931 | -1.255655 | -0.216057 |
| H | 0.823523  | 2.098393  | -0.210614 |
| H | -1.254766 | 1.336399  | -1.304902 |
| H | -1.641473 | 2.156860  | 0.195077  |
| H | -1.946378 | 0.000042  | 1.362493  |
| H | -2.939807 | 0.000003  | -0.086928 |
| H | 0.823497  | -2.098392 | -0.210751 |
| H | 0.388818  | -1.251388 | 1.281997  |
| H | -1.254856 | -1.336462 | -1.304846 |
| H | -1.641453 | -2.156831 | 0.195227  |
| H | 0.388737  | 1.251282  | 1.282049  |
| N | 0.974834  | -0.000004 | -0.293513 |
| C | 2.427377  | 0.000011  | 0.058281  |
| H | 2.889725  | -0.891027 | -0.357411 |
| H | 2.889701  | 0.891054  | -0.357424 |
| H | 2.520747  | 0.000021  | 1.141017  |
| H | 0.907112  | 0.000013  | -1.314122 |

33

5H+ SCF Done: -449.11643974 A.U.

|   |           |           |           |
|---|-----------|-----------|-----------|
| C | -0.000005 | 2.166809  | 0.048870  |
| C | 1.243150  | 1.451787  | -0.458769 |
| C | 1.353189  | -0.015758 | -0.021080 |
| C | -1.353189 | -0.015765 | -0.021080 |
| C | -1.243155 | 1.451780  | -0.458771 |
| H | 1.257299  | 1.496323  | -1.552407 |
| H | 2.149411  | 1.953871  | -0.118253 |

|   |           |           |           |
|---|-----------|-----------|-----------|
| H | -0.000006 | 2.227879  | 1.138467  |
| H | -0.000007 | 3.195008  | -0.315106 |
| H | -1.257300 | 1.496312  | -1.552409 |
| H | -2.149419 | 1.953861  | -0.118260 |
| N | 0.000001  | -0.727700 | -0.392193 |
| C | 0.000010  | -2.184251 | -0.037571 |
| H | -0.880638 | -2.654202 | -0.457712 |
| H | 0.880693  | -2.654179 | -0.457666 |
| H | -0.000015 | -2.298493 | 1.038698  |
| H | 0.000001  | -0.693584 | -1.413536 |
| C | 2.458706  | -0.691213 | -0.842164 |
| H | 2.188677  | -0.781784 | -1.896368 |
| H | 3.348044  | -0.064380 | -0.786602 |
| H | 2.730898  | -1.672967 | -0.459713 |
| C | 1.673501  | -0.143546 | 1.466259  |
| H | 2.670510  | 0.269238  | 1.618681  |
| H | 0.991930  | 0.410068  | 2.103528  |
| H | 1.701592  | -1.179814 | 1.797868  |
| C | -2.458707 | -0.691219 | -0.842164 |
| H | -3.348045 | -0.064386 | -0.786599 |
| H | -2.188679 | -0.781784 | -1.896369 |
| H | -2.730897 | -1.672974 | -0.459716 |
| C | -1.673504 | -0.143554 | 1.466259  |
| H | -0.991907 | 0.410020  | 2.103532  |
| H | -2.670494 | 0.269273  | 1.618687  |
| H | -1.701642 | -1.179824 | 1.797856  |

39

6H+ SCF Done: -602.790039580 A.U.

|   |           |           |           |
|---|-----------|-----------|-----------|
| N | -0.544887 | -0.005951 | -0.372476 |
| C | -1.204134 | -1.419032 | 0.014719  |
| C | -0.483325 | -2.449315 | -0.861224 |
| H | -0.941652 | -3.421453 | -0.683637 |
| H | -0.590522 | -2.223438 | -1.923533 |
| H | 0.574257  | -2.529960 | -0.621273 |
| C | -1.236020 | 1.409114  | -0.020189 |
| C | -2.395582 | 1.626203  | -0.998851 |
| H | -2.715788 | 2.663122  | -0.905863 |
| H | -2.085709 | 1.478709  | -2.035473 |
| H | -3.257941 | 1.003091  | -0.795405 |
| C | -1.714617 | 1.465680  | 1.422678  |
| H | -2.130429 | 2.459828  | 1.588179  |
| H | -2.502173 | 0.747348  | 1.632322  |
| H | -0.904722 | 1.332188  | 2.136295  |
| C | 0.919577  | -0.006122 | -0.157190 |
| C | 1.735796  | -0.055034 | -1.279377 |
| C | 1.469878  | 0.070086  | 1.115197  |
| C | 3.116701  | -0.045674 | -1.128953 |
| H | 1.304475  | -0.098145 | -2.272207 |
| C | 2.851793  | 0.080963  | 1.257670  |
| H | 0.846405  | 0.136785  | 1.991212  |
| C | 3.677422  | 0.019024  | 0.140769  |
| H | 3.748336  | -0.086796 | -2.005903 |

|   |           |           |           |
|---|-----------|-----------|-----------|
| H | 3.279665  | 0.142262  | 2.249146  |
| H | 4.752532  | 0.026716  | 0.259936  |
| C | -1.012828 | -1.773749 | 1.485653  |
| H | -1.425079 | -1.033871 | 2.164271  |
| H | -1.547495 | -2.707850 | 1.658030  |
| H | 0.029969  | -1.950929 | 1.733959  |
| C | -2.686130 | -1.413328 | -0.350132 |
| H | -2.852125 | -1.137980 | -1.390808 |
| H | -3.056356 | -2.429571 | -0.219851 |
| H | -3.277991 | -0.770289 | 0.294785  |
| C | -0.193674 | 2.502829  | -0.278803 |
| H | 0.634157  | 2.473632  | 0.423874  |
| H | 0.204624  | 2.455456  | -1.292348 |
| H | -0.695698 | 3.462600  | -0.163038 |
| H | -0.645680 | -0.019668 | -1.387139 |

40

7H+ SCF Done: -695.066860902 A.U.

|   |           |           |           |
|---|-----------|-----------|-----------|
| N | -1.056909 | 0.044707  | 0.377432  |
| C | -1.598924 | 1.372644  | -0.359400 |
| C | -1.195217 | 2.531297  | 0.558102  |
| H | -1.602253 | 3.449001  | 0.135665  |
| H | -1.607745 | 2.420718  | 1.562430  |
| H | -0.116397 | 2.650488  | 0.628714  |
| C | -1.574677 | -1.445888 | 0.009231  |
| C | -2.952427 | -1.625720 | 0.653789  |
| H | -3.229332 | -2.674518 | 0.554181  |
| H | -2.929049 | -1.400401 | 1.722468  |
| H | -3.733352 | -1.040353 | 0.183974  |
| C | -1.625555 | -1.675385 | -1.493056 |
| H | -1.938271 | -2.707644 | -1.651160 |
| H | -2.348696 | -1.037809 | -1.993578 |
| H | -0.653581 | -1.560366 | -1.967623 |
| C | 0.399805  | 0.109241  | 0.605865  |
| C | 1.297390  | -0.081113 | -0.430986 |
| C | 0.851762  | 0.341269  | 1.898967  |
| C | 2.666240  | -0.020342 | -0.160454 |
| H | 0.967335  | -0.289901 | -1.434365 |
| C | 2.214545  | 0.401700  | 2.159699  |
| H | 0.148099  | 0.474905  | 2.710653  |
| C | 3.129871  | 0.225331  | 1.134796  |
| H | 4.191956  | 0.271066  | 1.328667  |
| H | 2.558824  | 0.585408  | 3.167571  |
| C | -0.981000 | 1.569282  | -1.739237 |
| H | -1.155826 | 0.736620  | -2.412925 |
| H | -1.458004 | 2.446578  | -2.176108 |
| H | 0.084032  | 1.780054  | -1.690531 |
| C | -3.120525 | 1.318352  | -0.451567 |
| H | -3.586705 | 1.161454  | 0.519907  |
| H | -3.457035 | 2.286719  | -0.820046 |
| H | -3.474865 | 0.566892  | -1.150865 |
| C | -0.613904 | -2.440239 | 0.669658  |
| H | 0.370851  | -2.451061 | 0.210698  |

|   |           |           |           |
|---|-----------|-----------|-----------|
| H | -0.503058 | -2.254128 | 1.737905  |
| H | -1.044661 | -3.433327 | 0.549388  |
| C | 3.596844  | -0.217560 | -1.228171 |
| N | 4.345302  | -0.375839 | -2.089272 |
| H | -1.466389 | 0.160319  | 1.304453  |

40

8H+ SCF Done: -695.065731934 A.U.

|   |           |           |           |
|---|-----------|-----------|-----------|
| N | -0.620871 | 0.039148  | 0.145403  |
| C | -1.313036 | 1.348088  | -0.501719 |
| C | -0.472289 | 2.529262  | -0.007584 |
| H | -0.939702 | 3.444343  | -0.368639 |
| H | -0.440944 | 2.582845  | 1.081253  |
| H | 0.544702  | 2.506216  | -0.393686 |
| C | -1.359805 | -1.403159 | 0.240336  |
| C | -2.383394 | -1.319303 | 1.377423  |
| H | -2.706864 | -2.334281 | 1.604022  |
| H | -1.948531 | -0.908160 | 2.290658  |
| H | -3.267615 | -0.748938 | 1.120140  |
| C | -2.019489 | -1.792060 | -1.072678 |
| H | -2.458138 | -2.780432 | -0.931759 |
| H | -2.824194 | -1.118715 | -1.354051 |
| H | -1.309269 | -1.870858 | -1.892720 |
| C | 0.798637  | -0.066236 | -0.233781 |
| C | 1.782759  | 0.209078  | 0.729795  |
| C | 1.179883  | -0.455892 | -1.505712 |
| C | 3.136349  | 0.112928  | 0.395911  |
| C | 2.528888  | -0.551893 | -1.828346 |
| H | 0.441569  | -0.701733 | -2.249905 |
| C | 3.506368  | -0.262800 | -0.884819 |
| H | 3.882038  | 0.331166  | 1.146906  |
| H | 2.809906  | -0.859245 | -2.826145 |
| H | 4.553642  | -0.336531 | -1.142117 |
| C | -1.317875 | 1.318093  | -2.025400 |
| H | -1.818586 | 0.447760  | -2.437247 |
| H | -1.871277 | 2.197659  | -2.354394 |
| H | -0.318919 | 1.396955  | -2.445550 |
| C | -2.732007 | 1.482869  | 0.040212  |
| H | -2.760578 | 1.474204  | 1.128838  |
| H | -3.112066 | 2.449763  | -0.287687 |
| H | -3.404097 | 0.723938  | -0.349590 |
| C | -0.293960 | -2.432321 | 0.630609  |
| H | 0.435067  | -2.609112 | -0.155443 |
| H | 0.230422  | -2.157532 | 1.545762  |
| H | -0.809402 | -3.372785 | 0.819928  |
| C | 1.407411  | 0.570904  | 2.057641  |
| N | 1.052108  | 0.849151  | 3.118448  |
| H | -0.616462 | 0.300039  | 1.133153  |

40

9H+ SCF Done: -695.067218852 A.U.

|   |           |           |           |
|---|-----------|-----------|-----------|
| N | -1.104403 | -0.006007 | -0.374394 |
| C | -1.749962 | -1.423990 | 0.042340  |
| C | -1.065530 | -2.453459 | -0.861901 |

|   |           |           |           |
|---|-----------|-----------|-----------|
| H | -1.512814 | -3.426049 | -0.660564 |
| H | -1.223182 | -2.231688 | -1.918491 |
| H | 0.001934  | -2.534044 | -0.669572 |
| C | -1.780003 | 1.416609  | 0.004310  |
| C | -2.968404 | 1.633368  | -0.937548 |
| H | -3.289935 | 2.668094  | -0.826704 |
| H | -2.688825 | 1.495321  | -1.983800 |
| H | -3.820971 | 1.004666  | -0.711882 |
| C | -2.211897 | 1.469105  | 1.461304  |
| H | -2.624497 | 2.462225  | 1.640213  |
| H | -2.990691 | 0.749089  | 1.695392  |
| H | -1.380128 | 1.338753  | 2.149699  |
| C | 0.362555  | -0.006899 | -0.211830 |
| C | 1.143051  | -0.061281 | -1.359661 |
| C | 0.953423  | 0.070845  | 1.043088  |
| C | 2.524249  | -0.057271 | -1.259546 |
| H | 0.685246  | -0.104774 | -2.339629 |
| C | 2.334053  | 0.076631  | 1.149743  |
| H | 0.360639  | 0.142567  | 1.939184  |
| C | 3.124936  | 0.007637  | -0.000427 |
| H | 3.131732  | -0.101898 | -2.151941 |
| H | 2.796794  | 0.138621  | 2.124255  |
| C | -1.500133 | -1.774397 | 1.504727  |
| H | -1.876575 | -1.029008 | 2.197929  |
| H | -2.036785 | -2.702227 | 1.702384  |
| H | -0.450170 | -1.964567 | 1.710598  |
| C | -3.243809 | -1.411602 | -0.266888 |
| H | -3.446104 | -1.136931 | -1.301253 |
| H | -3.611909 | -2.426702 | -0.122520 |
| H | -3.809349 | -0.766475 | 0.399037  |
| C | -0.742636 | 2.506516  | -0.286355 |
| H | 0.105382  | 2.479331  | 0.392260  |
| H | -0.375723 | 2.461146  | -1.311901 |
| H | -1.239455 | 3.466963  | -0.155400 |
| C | 4.550522  | 0.009603  | 0.111295  |
| N | 5.698858  | 0.010495  | 0.201648  |
| H | -1.248289 | -0.022318 | -1.383965 |

55

10H+ SCF Done: -1061.16454338 A.U.

|   |           |           |           |
|---|-----------|-----------|-----------|
| N | -0.222593 | 0.023084  | -0.171138 |
| C | -1.726545 | 0.207970  | 0.171976  |
| C | -2.015145 | 1.212592  | 1.286664  |
| C | -2.481059 | 0.555263  | -1.111179 |
| H | -2.056889 | -0.775533 | 0.502844  |
| C | -3.526038 | 1.235104  | 1.560669  |
| H | -1.703408 | 2.215283  | 0.989733  |
| H | -1.477778 | 0.963282  | 2.198564  |
| C | -3.988933 | 0.614277  | -0.839104 |
| H | -2.141766 | 1.522897  | -1.491877 |
| H | -2.270243 | -0.192819 | -1.878603 |
| C | -4.318666 | 1.580388  | 0.299513  |
| H | -3.728073 | 1.958464  | 2.352074  |



|   |           |           |           |
|---|-----------|-----------|-----------|
| H | -3.840707 | 0.257296  | 1.939361  |
| H | -4.505035 | 0.905553  | -1.755265 |
| H | -4.344459 | -0.388649 | -0.581896 |
| H | -5.389505 | 1.558433  | 0.510413  |
| H | -4.077281 | 2.603022  | -0.009607 |
| C | 0.526204  | 1.384175  | -0.294293 |
| C | 1.309495  | 1.820382  | 0.937638  |
| C | 1.370395  | 1.445732  | -1.568534 |
| H | -0.293675 | 2.084003  | -0.432844 |
| C | 1.833752  | 3.248070  | 0.718882  |
| H | 2.153138  | 1.150423  | 1.111939  |
| H | 0.680851  | 1.802439  | 1.825454  |
| C | 1.867644  | 2.881484  | -1.774871 |
| H | 2.226367  | 0.778029  | -1.502562 |
| H | 0.776073  | 1.126463  | -2.428444 |
| C | 2.661869  | 3.365755  | -0.560747 |
| H | 2.423145  | 3.542352  | 1.588677  |
| H | 0.982622  | 3.935160  | 0.667777  |
| H | 2.480382  | 2.919047  | -2.676997 |
| H | 1.012958  | 3.544907  | -1.944693 |
| H | 2.980599  | 4.399726  | -0.706078 |
| H | 3.571901  | 2.764433  | -0.461201 |
| C | 0.404336  | -1.156434 | 0.590625  |
| C | 0.293835  | -1.072482 | 2.105407  |
| H | -0.745781 | -1.051214 | 2.420668  |
| H | 0.743091  | -1.969787 | 2.519955  |
| H | 0.818515  | -0.214026 | 2.505188  |
| C | 1.856150  | -1.349500 | 0.070374  |
| C | -0.290554 | -2.469149 | 0.108878  |
| O | 2.748761  | -1.334909 | 1.038895  |
| O | 2.083972  | -1.527507 | -1.099695 |
| O | -0.271321 | -3.473160 | 0.765415  |
| O | -0.825549 | -2.341057 | -1.097566 |
| C | 4.128311  | -1.572069 | 0.651585  |
| H | 4.694696  | -1.519107 | 1.574742  |
| H | 4.214663  | -2.555700 | 0.194800  |
| H | 4.450129  | -0.805282 | -0.050163 |
| C | -1.415116 | -3.529343 | -1.687330 |
| H | -1.803650 | -3.207337 | -2.647251 |
| H | -0.647596 | -4.290150 | -1.810336 |
| H | -2.212106 | -3.899258 | -1.046131 |
| H | -0.239546 | -0.324162 | -1.133579 |

52

11H+ SCF Done: -910.412126116 A.U.

|   |           |          |           |
|---|-----------|----------|-----------|
| N | 0.113821  | 0.976338 | -0.288060 |
| C | 0.164799  | 2.525374 | -0.223672 |
| C | -0.858858 | 3.103290 | -1.187948 |
| H | -1.878326 | 2.929333 | -0.846143 |
| H | -0.697665 | 4.179216 | -1.249830 |
| H | -0.750355 | 2.691806 | -2.192551 |
| H | 1.160354  | 2.758580 | -0.592738 |
| C | 0.005857  | 3.057978 | 1.188261  |

|   |           |           |           |
|---|-----------|-----------|-----------|
| H | 0.713966  | 2.619033  | 1.889375  |
| H | 0.195363  | 4.130865  | 1.159882  |
| H | -1.006239 | 2.911433  | 1.561779  |
| C | -1.233446 | 0.414548  | -0.057929 |
| C | -1.967220 | -0.019288 | -1.148108 |
| C | -1.758567 | 0.315808  | 1.227143  |
| C | -3.240879 | -0.547611 | -0.974030 |
| H | -1.562531 | 0.047861  | -2.150308 |
| C | -3.023666 | -0.207098 | 1.407364  |
| H | -1.193368 | 0.631094  | 2.090968  |
| C | -3.779323 | -0.640824 | 0.310927  |
| H | -3.793062 | -0.879965 | -1.839452 |
| H | -3.447546 | -0.291675 | 2.398430  |
| O | -5.002337 | -1.133191 | 0.597051  |
| C | -5.830686 | -1.593584 | -0.472897 |
| H | -6.750941 | -1.935079 | -0.007523 |
| H | -6.053030 | -0.784564 | -1.172635 |
| H | -5.359888 | -2.423857 | -1.004408 |
| C | 1.203639  | 0.245839  | 0.523802  |
| H | 0.920038  | 0.386961  | 1.563536  |
| C | 2.610506  | 0.820767  | 0.288733  |
| C | 1.193155  | -1.255809 | 0.179900  |
| H | 2.633808  | 1.884440  | 0.523166  |
| C | 3.072164  | 0.578884  | -1.159415 |
| C | 3.567184  | 0.096651  | 1.258062  |
| H | 0.190008  | -1.657856 | 0.321096  |
| C | 1.659383  | -1.487894 | -1.268560 |
| C | 2.161444  | -1.962813 | 1.146284  |
| H | 4.073610  | 0.995929  | -1.284897 |
| H | 2.436611  | 1.106030  | -1.879794 |
| C | 3.078599  | -0.929630 | -1.458324 |
| H | 3.260594  | 0.278322  | 2.291968  |
| H | 4.567698  | 0.519042  | 1.140896  |
| C | 3.580999  | -1.408727 | 0.960143  |
| H | 0.972430  | -1.034521 | -1.992112 |
| H | 1.639039  | -2.559630 | -1.477188 |
| H | 1.830008  | -1.822766 | 2.178969  |
| H | 2.139954  | -3.036107 | 0.944288  |
| H | 3.402116  | -1.095347 | -2.488023 |
| C | 4.039418  | -1.640179 | -0.489427 |
| H | 4.263548  | -1.910986 | 1.649131  |
| H | 4.063405  | -2.711227 | -0.707891 |
| H | 5.055291  | -1.259509 | -0.626095 |
| H | 0.330040  | 0.770207  | -1.263735 |

36

12H+ SCF Done: -488.390275302 A.U.

|   |           |           |           |
|---|-----------|-----------|-----------|
| N | 0.003217  | -0.131738 | -0.262099 |
| C | -1.495921 | 0.382975  | -0.009465 |
| C | -2.453836 | -0.814570 | -0.076067 |
| H | -2.300255 | -1.529360 | 0.726291  |
| H | -3.462137 | -0.416535 | 0.029918  |
| H | -2.405708 | -1.330041 | -1.033235 |

|   |           |           |           |
|---|-----------|-----------|-----------|
| C | -1.624489 | 1.029038  | 1.365568  |
| H | -1.050816 | 1.944286  | 1.468050  |
| H | -2.673811 | 1.286738  | 1.509152  |
| H | -1.345720 | 0.342697  | 2.164392  |
| C | 1.247294  | 0.855172  | -0.016859 |
| C | 0.934497  | 2.285324  | -0.456563 |
| H | 0.163810  | 2.764836  | 0.136651  |
| H | 1.846987  | 2.864057  | -0.318837 |
| H | 0.671639  | 2.341676  | -1.511294 |
| C | 2.403187  | 0.352664  | -0.895347 |
| H | 2.087565  | 0.162672  | -1.923039 |
| H | 3.158853  | 1.136033  | -0.930689 |
| H | 2.878292  | -0.535984 | -0.495502 |
| C | 1.669143  | 0.825742  | 1.450787  |
| H | 2.521376  | 1.497170  | 1.555546  |
| H | 0.892792  | 1.174542  | 2.125202  |
| H | 1.997750  | -0.162627 | 1.763978  |
| C | -1.893120 | 1.337585  | -1.142948 |
| H | -1.461169 | 2.326205  | -1.060117 |
| H | -1.644533 | 0.924266  | -2.122846 |
| H | -2.975212 | 1.455220  | -1.111329 |
| C | 0.235031  | -1.452438 | 0.393892  |
| C | -0.192935 | -2.744492 | -0.232079 |
| C | 1.264441  | -2.439110 | -0.079886 |
| H | 0.099460  | -1.367337 | 1.460177  |
| H | -0.582999 | -2.725790 | -1.240320 |
| H | -0.671740 | -3.464472 | 0.416638  |
| H | 1.847791  | -2.933977 | 0.684164  |
| H | 1.800248  | -2.243880 | -0.995403 |
| H | 0.025269  | -0.295565 | -1.269051 |

35

13H+ SCF Done: -450.308474701 A.U.

|   |           |           |           |
|---|-----------|-----------|-----------|
| N | 0.133689  | -0.007958 | -0.431037 |
| C | -1.285893 | -0.607789 | -0.025287 |
| C | -1.268984 | -2.131392 | -0.196469 |
| H | -0.627680 | -2.636508 | 0.522333  |
| H | -2.285512 | -2.483494 | -0.025195 |
| H | -0.990588 | -2.433309 | -1.206217 |
| C | -1.679190 | -0.256773 | 1.405601  |
| H | -1.918743 | 0.796228  | 1.519111  |
| H | -2.580314 | -0.820666 | 1.644646  |
| H | -0.918893 | -0.529828 | 2.132416  |
| C | 0.512326  | 1.453495  | -0.052203 |
| C | -0.313704 | 2.480664  | -0.817353 |
| H | -1.306196 | 2.615656  | -0.393168 |
| H | 0.204556  | 3.437166  | -0.742688 |
| H | -0.406234 | 2.238999  | -1.876818 |
| C | 0.575779  | 1.797597  | 1.434437  |
| H | 1.256967  | 2.643578  | 1.532346  |
| H | -0.387532 | 2.110689  | 1.826848  |
| H | 0.958271  | 0.997578  | 2.056973  |
| C | -2.311035 | -0.038949 | -1.013962 |

|   |           |           |           |
|---|-----------|-----------|-----------|
| H | -2.448713 | 1.032030  | -0.913479 |
| H | -2.041813 | -0.266295 | -2.047634 |
| H | -3.272447 | -0.511665 | -0.816292 |
| C | 1.338994  | -0.979185 | -0.304127 |
| C | 1.783334  | -1.269351 | 1.120223  |
| H | 2.455935  | -2.126850 | 1.083466  |
| H | 2.338507  | -0.440163 | 1.553068  |
| H | 0.959708  | -1.529660 | 1.780444  |
| C | 2.502420  | -0.519033 | -1.179521 |
| H | 3.178323  | -1.365773 | -1.300093 |
| H | 2.177466  | -0.215792 | -2.176727 |
| H | 3.075382  | 0.291539  | -0.730913 |
| H | 0.962331  | -1.894510 | -0.743942 |
| H | 1.522209  | 1.514210  | -0.444652 |
| H | 0.034898  | 0.056853  | -1.444605 |

38

14H+ SCF Done: -489.625290012 A.U.

|   |           |           |           |
|---|-----------|-----------|-----------|
| N | 0.011241  | -0.085242 | -0.402916 |
| C | -1.576403 | 0.023263  | -0.110200 |
| C | -2.269997 | -1.301058 | -0.473682 |
| H | -2.000684 | -2.132801 | 0.170638  |
| H | -3.339077 | -1.137362 | -0.345935 |
| H | -2.111586 | -1.579881 | -1.515945 |
| C | -1.885254 | 0.352367  | 1.349184  |
| H | -1.456867 | 1.289052  | 1.685545  |
| H | -2.968065 | 0.445339  | 1.435352  |
| H | -1.573754 | -0.434063 | 2.030560  |
| C | 0.985569  | 1.080290  | 0.101592  |
| C | 0.315893  | 2.458929  | 0.022253  |
| H | -0.536790 | 2.582786  | 0.678208  |
| H | 1.063964  | 3.184474  | 0.338131  |
| H | 0.032487  | 2.713157  | -0.996975 |
| C | 2.179249  | 1.157992  | -0.867077 |
| H | 1.855805  | 1.179533  | -1.909354 |
| H | 2.698955  | 2.095174  | -0.673671 |
| H | 2.900317  | 0.362579  | -0.736426 |
| C | 1.473228  | 0.812482  | 1.522316  |
| H | 2.166772  | -0.022089 | 1.562783  |
| H | 2.014503  | 1.695711  | 1.860298  |
| H | 0.662215  | 0.632534  | 2.222687  |
| C | -2.164367 | 1.081014  | -1.060133 |
| H | -1.967854 | 2.101521  | -0.760887 |
| H | -1.815853 | 0.939010  | -2.085430 |
| H | -3.245733 | 0.953741  | -1.070785 |
| C | 0.524390  | -1.558584 | -0.275132 |
| C | 0.507995  | -2.153764 | 1.128375  |
| H | 0.549481  | -3.237444 | 1.010631  |
| H | 1.368273  | -1.858915 | 1.720777  |
| H | -0.391232 | -1.926712 | 1.689790  |
| C | 1.853266  | -1.844289 | -0.967833 |
| H | 1.900137  | -2.925660 | -1.103577 |
| H | 1.924738  | -1.390072 | -1.954928 |

H 2.716061 -1.557790 -0.372061  
H 0.028257 0.056999 -1.412351  
H -0.214582 -2.083987 -0.864645

41

15H+ SCF Done: -528.935847633 A.U.

N -0.000729 -0.000557 -0.335384  
C 1.080843 -1.172973 -0.017170  
C 2.535765 -0.720043 -0.228197  
H 2.867067 0.066893 0.436100  
H 3.151115 -1.590571 -0.006187  
H 2.736029 -0.442679 -1.260025  
C 0.949224 -1.681534 1.418006  
H -0.012716 -2.127182 1.638980  
H 1.699632 -2.460068 1.555825  
H 1.145779 -0.904175 2.150943  
C -1.557705 -0.348783 -0.018286  
C -1.893925 -1.833524 -0.236747  
H -1.375535 -2.518494 0.420730  
H -2.954769 -1.932508 -0.011804  
H -1.757193 -2.137651 -1.271408  
C -2.440417 0.387022 -1.050918  
H -2.001910 0.360747 -2.049884  
H -3.389399 -0.142266 -1.111022  
H -2.668775 1.411532 -0.796446  
C -1.934924 0.014261 1.417163  
H -1.834141 1.068470 1.643704  
H -2.987049 -0.239213 1.547509  
H -1.368214 -0.553060 2.150183  
C 0.891707 -2.302703 -1.053176  
H 0.106222 -3.004595 -0.815508  
H 0.720772 -1.905997 -2.055404  
H 1.819330 -2.870175 -1.095390  
C 0.476313 1.521295 -0.018399  
C 0.970733 1.664779 1.420588  
H 1.270629 2.703820 1.557366  
H 0.193376 1.450303 2.148237  
H 1.834849 1.053871 1.650376  
C -0.639795 2.555866 -0.240708  
H -0.193471 3.523589 -0.016962  
H -0.971768 2.589573 -1.275336  
H -1.492298 2.451360 0.417442  
H -0.003621 -0.002035 -1.353558  
C 1.562297 1.916647 -1.044813  
H 2.564608 1.623250 -0.768840  
H 1.343355 1.527498 -2.040758  
H 1.562493 3.001801 -1.125232

36

16H+ SCF Done: -488.446618442 A.U.

C -1.440984 0.031609 -0.024783  
C -1.616810 -1.497098 -0.144128  
C -0.374053 -2.112071 0.468842  
C 0.779068 -1.195782 0.049547

|   |           |           |           |
|---|-----------|-----------|-----------|
| H | -1.710724 | -1.784767 | -1.190272 |
| H | -2.529355 | -1.811637 | 0.358402  |
| H | -0.443464 | -2.135774 | 1.559010  |
| H | -0.192543 | -3.131519 | 0.133493  |
| N | 0.118170  | 0.204274  | 0.276580  |
| C | -2.205429 | 0.562054  | 1.187348  |
| H | -2.028654 | 1.618693  | 1.371066  |
| H | -3.271787 | 0.427569  | 1.008738  |
| H | -1.949667 | 0.004218  | 2.090562  |
| C | -1.872917 | 0.713463  | -1.317662 |
| H | -2.905403 | 0.414826  | -1.501529 |
| H | -1.852421 | 1.798593  | -1.272356 |
| H | -1.284266 | 0.383822  | -2.172432 |
| C | 1.976990  | -1.419445 | 0.971119  |
| H | 2.160173  | -2.493550 | 1.013524  |
| H | 2.889081  | -0.945240 | 0.625543  |
| H | 1.769241  | -1.084893 | 1.989207  |
| C | 1.144758  | -1.387887 | -1.419636 |
| H | 1.922812  | -0.703652 | -1.747698 |
| H | 1.526839  | -2.401376 | -1.540261 |
| H | 0.289266  | -1.275513 | -2.081878 |
| C | 0.785499  | 1.457096  | -0.306900 |
| H | 0.586036  | 1.420615  | -1.374349 |
| C | 0.175146  | 2.716921  | 0.308541  |
| H | 0.680672  | 3.581174  | -0.119826 |
| H | -0.884930 | 2.836016  | 0.115887  |
| H | 0.338913  | 2.739524  | 1.388197  |
| C | 2.293787  | 1.493522  | -0.074333 |
| H | 2.834313  | 0.715715  | -0.601869 |
| H | 2.657026  | 2.449348  | -0.450131 |
| H | 2.538000  | 1.441748  | 0.987044  |
| H | 0.163318  | 0.331855  | 1.288150  |

39

17H+ SCF Done: -527.767047655 A.U.

|   |           |           |           |
|---|-----------|-----------|-----------|
| C | -0.871962 | -1.254659 | -0.012112 |
| C | -2.208315 | -0.610338 | 0.389119  |
| C | -2.201675 | 0.768174  | -0.229480 |
| C | -0.785345 | 1.308530  | -0.003882 |
| H | -2.283944 | -0.543871 | 1.474303  |
| H | -3.037240 | -1.225966 | 0.044056  |
| H | -2.409449 | 0.716996  | -1.300510 |
| H | -2.935768 | 1.440268  | 0.210779  |
| N | 0.068230  | 0.015283  | -0.322326 |
| C | -1.018522 | -2.019339 | -1.329858 |
| H | -0.071313 | -2.413382 | -1.690437 |
| H | -1.689257 | -2.862650 | -1.170224 |
| H | -1.456240 | -1.393677 | -2.110186 |
| C | -0.398773 | -2.173483 | 1.103637  |
| H | -1.196525 | -2.902583 | 1.254413  |
| H | 0.503827  | -2.728744 | 0.865512  |
| H | -0.265403 | -1.643429 | 2.043221  |
| C | -0.522794 | 2.437683  | -1.002032 |

|   |           |           |           |
|---|-----------|-----------|-----------|
| H | -1.380924 | 3.109410  | -0.958445 |
| H | 0.361612  | 3.024414  | -0.779254 |
| H | -0.454732 | 2.066798  | -2.026178 |
| C | -0.594914 | 1.786748  | 1.430112  |
| H | 0.394540  | 2.204667  | 1.595881  |
| H | -1.317775 | 2.582255  | 1.611634  |
| H | -0.772761 | 1.001749  | 2.162514  |
| C | 1.619239  | -0.047626 | -0.030160 |
| C | 2.189755  | -1.199297 | -0.866596 |
| H | 3.268549  | -1.219101 | -0.716254 |
| H | 1.805938  | -2.171480 | -0.574411 |
| H | 2.010135  | -1.052460 | -1.932926 |
| C | 2.259235  | 1.249532  | -0.537105 |
| H | 2.024334  | 2.103382  | 0.091465  |
| H | 3.339585  | 1.114522  | -0.507323 |
| H | 1.986465  | 1.471993  | -1.568080 |
| C | 1.982851  | -0.240250 | 1.445068  |
| H | 3.043861  | -0.010029 | 1.542004  |
| H | 1.446781  | 0.426843  | 2.110427  |
| H | 1.846878  | -1.259752 | 1.785433  |
| H | 0.068542  | 0.022795  | -1.341400 |

39

18H+ SCF Done: -370.458599103 A.U.

|   |           |           |           |
|---|-----------|-----------|-----------|
| C | 2.629053  | -0.000501 | 0.185998  |
| C | 1.944740  | -1.211570 | -0.400676 |
| C | 0.454740  | -1.369710 | -0.043652 |
| C | 0.455245  | 1.369581  | -0.043594 |
| C | 1.945217  | 1.210911  | -0.400516 |
| H | 2.046135  | -1.177340 | -1.489267 |
| H | 2.424051  | -2.136138 | -0.077287 |
| H | 2.594612  | -0.000570 | 1.276777  |
| H | 3.684076  | -0.000686 | -0.091526 |
| H | 2.046687  | 1.176802  | -1.489102 |
| H | 2.424850  | 2.135256  | -0.076961 |
| N | -0.346084 | 0.000067  | -0.308151 |
| C | -1.784169 | 0.000303  | 0.310558  |
| H | -1.610531 | 0.000353  | 1.382186  |
| C | -2.616073 | -1.227895 | -0.064883 |
| H | -2.269742 | -2.150249 | 0.382243  |
| H | -3.622821 | -1.059238 | 0.312764  |
| H | -2.688468 | -1.353229 | -1.145480 |
| C | -2.615667 | 1.228700  | -0.065135 |
| H | -3.622599 | 1.060300  | 0.312128  |
| H | -2.269251 | 2.150950  | 0.382139  |
| H | -2.687634 | 1.354073  | -1.145759 |
| C | 0.317075  | 1.791533  | 1.417575  |
| H | -0.707829 | 1.989241  | 1.716001  |
| H | 0.739961  | 1.061264  | 2.102993  |
| H | 0.872214  | 2.720612  | 1.544551  |
| C | -0.058997 | 2.455033  | -1.007805 |
| H | 0.714680  | 3.218730  | -1.078497 |
| H | -0.206701 | 2.059700  | -2.014259 |

|   |           |           |           |
|---|-----------|-----------|-----------|
| H | -0.965198 | 2.951978  | -0.691641 |
| C | 0.316570  | -1.791607 | 1.417539  |
| H | -0.708388 | -1.988708 | 1.716168  |
| H | 0.871188  | -2.721014 | 1.544402  |
| H | 0.740017  | -1.061598 | 2.102886  |
| C | -0.060012 | -2.454951 | -1.007832 |
| H | -0.207605 | -2.059552 | -2.014276 |
| H | 0.713333  | -3.218979 | -1.078569 |
| H | -0.966412 | -2.951506 | -0.691620 |
| H | -0.482368 | 0.000124  | -1.319399 |

27

19H+ SCF Done: -370.458599103 A.U.

|   |           |           |           |
|---|-----------|-----------|-----------|
| C | 2.665505  | 0.016230  | 0.164671  |
| C | 1.905920  | -1.248692 | -0.222105 |
| C | 0.480717  | -1.237688 | 0.308488  |
| C | 0.462779  | 1.246447  | 0.233329  |
| C | 1.886031  | 1.240748  | -0.303812 |
| H | -0.061995 | -2.112295 | -0.031789 |
| H | 1.887161  | -1.356420 | -1.310447 |
| H | 2.392440  | -2.141810 | 0.172682  |
| H | 2.791714  | 0.053511  | 1.250853  |
| H | 3.662749  | 0.009502  | -0.275833 |
| H | -0.091664 | 2.089930  | -0.162194 |
| H | 0.441807  | 1.288966  | 1.322358  |
| H | 1.859672  | 1.273332  | -1.397721 |
| H | 2.361804  | 2.165452  | 0.025896  |
| H | 0.458844  | -1.211100 | 1.398048  |
| N | -0.285934 | -0.013008 | -0.152370 |
| C | -1.745492 | -0.022017 | 0.331934  |
| H | -1.669423 | -0.079640 | 1.418026  |
| C | -2.474245 | -1.247388 | -0.210615 |
| H | -2.091274 | -2.184822 | 0.184842  |
| H | -3.521520 | -1.178933 | 0.079361  |
| H | -2.434864 | -1.279211 | -1.301728 |
| C | -2.460165 | 1.262677  | -0.071468 |
| H | -3.511373 | 1.164711  | 0.195411  |
| H | -2.077673 | 2.141768  | 0.441541  |
| H | -2.403677 | 1.424837  | -1.150061 |
| H | -0.317480 | -0.038625 | -1.175189 |

30

20H+ SCF Done: -409.790459108 A.U.

|   |          |           |           |
|---|----------|-----------|-----------|
| C | 2.858936 | -0.002244 | 0.193298  |
| C | 2.102172 | -1.250355 | -0.253495 |
| C | 0.658956 | -1.232386 | 0.229338  |
| C | 0.659603 | 1.241106  | 0.222359  |
| C | 2.106783 | 1.249179  | -0.251122 |
| H | 0.118553 | -2.102348 | -0.126113 |
| H | 2.120609 | -1.336398 | -1.344188 |
| H | 2.567189 | -2.155652 | 0.139330  |
| H | 2.954103 | -0.003944 | 1.283231  |
| H | 3.868780 | -0.002987 | -0.217725 |
| H | 0.129296 | 2.108610  | -0.152624 |



|   |           |           |           |
|---|-----------|-----------|-----------|
| H | 0.598286  | 1.231332  | 1.308586  |
| H | 2.129862  | 1.336824  | -1.341660 |
| H | 2.574140  | 2.152246  | 0.144102  |
| H | 0.611357  | -1.207133 | 1.315678  |
| N | -0.066400 | 0.003306  | -0.265350 |
| C | -1.611693 | -0.001800 | -0.009368 |
| C | -2.199622 | -1.200680 | -0.759152 |
| H | -1.906423 | -2.154677 | -0.326547 |
| H | -3.285394 | -1.141004 | -0.701551 |
| H | -1.925535 | -1.189172 | -1.816190 |
| C | -2.192725 | 1.289748  | -0.591267 |
| H | -3.278412 | 1.207165  | -0.580916 |
| H | -1.931225 | 2.169244  | -0.006603 |
| H | -1.883196 | 1.443617  | -1.626903 |
| C | -1.891167 | -0.096834 | 1.487031  |
| H | -1.452581 | 0.731966  | 2.041214  |
| H | -2.970287 | -0.050396 | 1.630659  |
| H | -1.545028 | -1.036502 | 1.914623  |
| H | 0.023247  | 0.001652  | -1.284679 |

32

21H+ SCF Done: -410.993317114 A.U.

|   |           |           |           |
|---|-----------|-----------|-----------|
| N | -0.000885 | -0.000652 | -0.387304 |
| C | 1.346408  | -0.675563 | -0.056577 |
| C | 2.338958  | -0.329659 | -1.160876 |
| H | 2.563551  | 0.737460  | -1.187197 |
| H | 3.272217  | -0.859561 | -0.974931 |
| H | 1.973109  | -0.636789 | -2.142407 |
| C | 1.890478  | -0.343325 | 1.324078  |
| H | 1.201182  | -0.594093 | 2.124990  |
| H | 2.792671  | -0.937307 | 1.469925  |
| H | 2.173607  | 0.705068  | 1.411199  |
| C | -1.258269 | -0.827943 | -0.048590 |
| C | -1.463034 | -1.862155 | -1.149780 |
| H | -0.657013 | -2.596833 | -1.173396 |
| H | -2.393110 | -2.397206 | -0.962480 |
| H | -1.542359 | -1.393298 | -2.132509 |
| C | -1.234887 | -1.461702 | 1.333473  |
| H | -2.196671 | -1.951955 | 1.483666  |
| H | -0.463229 | -2.225670 | 1.420735  |
| H | -1.109859 | -0.736374 | 2.132061  |
| C | -0.088207 | 1.503146  | -0.054758 |
| C | -0.635788 | 1.806278  | 1.331180  |
| H | -0.576631 | 2.884875  | 1.476031  |
| H | -1.682904 | 1.522411  | 1.428466  |
| H | -0.064507 | 1.337544  | 2.126850  |
| C | -0.894577 | 2.191040  | -1.150654 |
| H | -0.888922 | 3.265178  | -0.970004 |
| H | -0.462574 | 2.019212  | -2.138336 |
| H | -1.934604 | 1.862081  | -1.158772 |
| H | 0.941438  | 1.849875  | -0.115729 |
| H | -2.072539 | -0.107834 | -0.097360 |
| H | 1.130344  | -1.740831 | -0.107881 |

H -0.003498 -0.002092 -1.406775  
26

22H+ SCF Done: -332.343185782 A.U.

N 0.202640 -0.607722 -0.318061  
C -1.201458 -0.030658 0.008769  
C -2.177733 -1.149570 -0.361720  
H -2.023732 -2.036242 0.256754  
H -3.196336 -0.801654 -0.197635  
H -2.084203 -1.429863 -1.412777  
C -1.278750 0.288331 1.496175  
H -0.623663 1.111333 1.777707  
H -2.300934 0.585881 1.727384  
H -1.039030 -0.583097 2.106785  
C 1.485182 -0.067151 0.310054  
C 1.751244 1.375825 -0.083822  
H 2.743427 1.649385 0.273038  
H 1.738584 1.502950 -1.167880  
H 1.041081 2.068328 0.360466  
C 2.615117 -1.000546 -0.109994  
H 3.534747 -0.686042 0.381482  
H 2.419693 -2.034624 0.179341  
H 2.779666 -0.960225 -1.188701  
H 1.329589 -0.145191 1.384119  
C -1.457350 1.197664 -0.860857  
H -0.803873 2.029867 -0.616230  
H -1.347803 0.963058 -1.921089  
H -2.484452 1.522570 -0.698648  
H 0.165754 -1.598797 -0.075154  
H 0.315499 -0.586955 -1.334170

23

23H+ SCF Done: -293.013703224 A.U.

N 0.000030 -0.631862 -0.000219  
C 1.290461 0.143034 -0.248923  
C 2.402740 -0.868252 -0.488415  
H 2.164364 -1.545405 -1.310162  
H 3.315025 -0.334368 -0.750792  
H 2.603466 -1.457533 0.409019  
C -1.290449 0.142947 0.248853  
C -2.402502 -0.868559 0.488454  
H -3.315088 -0.334864 0.750148  
H -2.602688 -1.458458 -0.408698  
H -2.164164 -1.545150 1.310666  
C -1.580248 1.080455 -0.910774  
H -2.535073 1.571528 -0.727042  
H -0.825007 1.857417 -1.017577  
H -1.660839 0.532648 -1.852014  
H -1.110893 0.710567 1.160096  
C 1.579955 1.080283 0.910993  
H 0.824873 1.857422 1.017608  
H 1.660017 0.532214 1.852132  
H 2.535014 1.571099 0.727808  
H -0.152910 -1.251997 -0.799403

H 1.111020 0.710814 -1.160087  
H 0.152933 -1.252351 0.798698

26

24H+ SCF Done: -791.909762736 A.U.

N -0.118179 -0.099830 -0.412841  
C -1.311939 0.796626 0.019781  
C -2.334710 0.779123 -1.104312  
H -2.748118 -0.220670 -1.242687  
H -3.152619 1.447725 -0.838684  
H -1.911683 1.129323 -2.047296  
C -1.909921 0.408215 1.360633  
H -1.166070 0.276492 2.140526  
H -2.572040 1.219852 1.662313  
H -2.505304 -0.499446 1.282421  
C 1.341032 0.319066 0.020360  
C 1.574410 1.702898 -0.594595  
H 0.976382 2.483086 -0.129553  
H 2.620900 1.956320 -0.432158  
H 1.399047 1.709155 -1.671735  
C 1.450175 0.341016 1.535061  
H 2.491876 0.533106 1.790100  
H 0.850808 1.133581 1.978070  
H 1.171247 -0.616756 1.973156  
H -0.856341 1.780410 0.090367  
Cl -0.473045 -1.807179 -0.104433  
C 2.303908 -0.690512 -0.602252  
H 2.229799 -1.670735 -0.137807  
H 2.146190 -0.792249 -1.677422  
H 3.317483 -0.323280 -0.447843  
H -0.100279 -0.063651 -1.434589

23

25H+ SCF Done: -752.578390376 A.U.

N -0.008722 0.203054 -0.427222  
C 1.316377 -0.609843 -0.388578  
C 2.341351 0.143529 -1.218560  
H 2.565765 1.113928 -0.774096  
H 3.263523 -0.435834 -1.243048  
H 2.008680 0.285266 -2.248241  
C 1.804240 -0.907373 1.017395  
H 1.034189 -1.324689 1.659864  
H 2.604099 -1.642478 0.929299  
H 2.215724 -0.017316 1.490418  
C -1.312331 -0.617455 -0.509411  
C -1.547908 -1.447519 0.735927  
H -2.503811 -1.956695 0.620457  
H -0.784804 -2.208420 0.880242  
H -1.608724 -0.819933 1.625012  
H 1.028802 -1.534248 -0.889663  
Cl -0.067930 1.465057 0.810175  
C -2.470249 0.302217 -0.858035  
H -2.739126 0.945692 -0.021423  
H -2.252743 0.920531 -1.730751

H -3.332162 -0.319037 -1.099044  
H -1.097038 -1.264742 -1.363162  
H 0.024627 0.749299 -1.290705

17

26H+ SCF Done: -1133.48206186 A.U.

N 0.427251 -0.000071 -0.446988  
C -1.104148 0.000023 0.042370  
C -1.715406 -1.259547 -0.560969  
H -1.304709 -2.168409 -0.128301  
H -2.781335 -1.234637 -0.336460  
H -1.607604 -1.289643 -1.646046  
C -1.116082 0.000009 1.556911  
H -2.158670 -0.000165 1.873485  
H -0.640932 -0.889555 1.966828  
H -0.641205 0.889745 1.966742  
Cl 1.332730 1.439941 0.004461  
C -1.715451 1.259645 -0.560930  
H -1.304835 2.168487 -0.128136  
H -1.607655 1.289873 -1.645989  
H -2.781367 1.234599 -0.336349  
Cl 1.332593 -1.439978 0.004478  
H 0.433589 0.000035 -1.473117

29

27H+ SCF Done: -831.231952600 A.U.

N -0.010999 0.243208 -0.397557  
C 1.418787 -0.385610 -0.006243  
C 2.406102 0.235963 -0.996921  
H 2.483652 1.314880 -0.887996  
H 3.389591 -0.188401 -0.800189  
H 2.144772 -0.005132 -2.029242  
C 1.786912 -0.045432 1.432113  
H 1.092925 -0.465759 2.153205  
H 2.766012 -0.485351 1.620807  
H 1.871755 1.025144 1.598406  
C -1.432224 -0.375330 0.010316  
C -1.483444 -0.610501 1.508664  
H -2.502992 -0.898529 1.764222  
H -0.825862 -1.415433 1.827176  
H -1.245918 0.296361 2.063667  
Cl 0.032315 1.985761 -0.045241  
C -2.506745 0.627496 -0.424526  
H -2.541459 1.506109 0.212763  
H -2.378284 0.941078 -1.461130  
H -3.468695 0.123720 -0.346912  
C 1.382708 -1.896560 -0.212990  
H 0.773856 -2.407147 0.527225  
H 1.060631 -2.173372 -1.214499  
H 2.406003 -2.250517 -0.089999  
C -1.627589 -1.660640 -0.801918  
H -1.032192 -2.492935 -0.450723  
H -2.674087 -1.944817 -0.699962  
H -1.438779 -1.503600 -1.865276

H -0.020327 0.226986 -1.420515  
51  
28H+ SCF Done: -485.014378873 A.U.  
C -2.041166 -1.253259 -0.014918  
C -3.451178 -0.630231 0.030901  
C -3.308987 0.770555 -0.525122  
C -1.968146 1.284570 0.005935  
H -3.816108 -0.601516 1.056577  
H -4.118233 1.434488 -0.226334  
N -1.074664 0.012165 -0.201708  
C -1.886700 -2.132202 -1.254819  
H -0.875406 -2.510028 -1.383497  
H -2.552638 -2.989001 -1.157264  
H -2.175306 -1.591410 -2.158504  
C -1.782799 -2.025788 1.274612  
H -2.591131 -2.751964 1.368071  
H -0.848529 -2.578767 1.285392  
H -1.824835 -1.383752 2.152733  
C -1.516338 2.469349 -0.844129  
H -2.329375 3.196183 -0.837571  
H -0.628645 2.969404 -0.472383  
H -1.352923 2.178004 -1.882323  
C -2.045961 1.646282 1.486867  
H -1.091472 1.982393 1.884163  
H -2.754159 2.467478 1.593335  
H -2.400121 0.822011 2.101730  
C 0.277676 -0.077125 0.519408  
H 0.013653 -0.232144 1.562165  
C 1.151703 1.193923 0.419872  
C 1.128626 -1.271221 0.018069  
H 0.592061 2.064849 0.744735  
C 1.701319 1.416674 -1.000098  
C 2.335009 1.014041 1.393976  
H 0.550130 -2.188411 0.031290  
C 1.669175 -1.034359 -1.402791  
C 2.312697 -1.443254 0.990159  
H 2.295765 2.333362 -1.004577  
H 0.898596 1.569928 -1.723755  
C 2.557004 0.216634 -1.425623  
H 1.964512 0.880236 2.414193  
H 2.931664 1.929293 1.387375  
C 3.191110 -0.186667 0.972797  
H 0.858391 -0.930377 -2.131537  
H 2.236390 -1.916138 -1.709790  
H 1.944375 -1.638329 2.001269  
H 2.891225 -2.318567 0.685514  
H 2.937486 0.378344 -2.436507  
C 3.730812 0.040596 -0.448643  
H 4.022241 -0.308825 1.670903  
H 4.348607 -0.808065 -0.755035  
H 4.368468 0.928596 -0.469732  
H -4.149341 -1.238246 -0.541264

H -3.283699 0.756155 -1.617302  
H -0.862136 0.018541 -1.198837

37

29H+ SCF Done: -526.535101849 A.U.

C -0.868431 -1.277681 -0.015775  
C -2.233339 -0.656548 0.038555  
C -2.232563 0.659041 0.038131  
C -0.866824 1.278428 -0.015853  
H -3.104893 -1.292038 0.097323  
H -3.103323 1.295655 0.096565  
N 0.023303 -0.000229 -0.324905  
C -0.794809 -2.272052 -1.179479  
H 0.138092 -2.825562 -1.209068  
H -1.601981 -2.993364 -1.049999  
H -0.949898 -1.777253 -2.139867  
C -0.566623 -1.960251 1.315727  
H -1.354182 -2.696516 1.480790  
H 0.380382 -2.494263 1.311760  
H -0.592278 -1.259380 2.147088  
C -0.791286 2.273123 -1.179188  
H -1.600035 2.993044 -1.051947  
H 0.140697 2.828308 -1.205963  
H -0.942826 1.778424 -2.140201  
C -0.565453 1.960418 1.316179  
H 0.385235 2.487786 1.316107  
H -1.348536 2.702406 1.476993  
H -0.600059 1.260631 2.148135  
C 1.573551 -0.000941 -0.024632  
C 2.171208 -1.235169 -0.707991  
H 3.255629 -1.162561 -0.640134  
H 1.879908 -2.164847 -0.228520  
H 1.911004 -1.278810 -1.765852  
C 2.170834 1.239959 -0.696303  
H 1.881921 2.164944 -0.206438  
H 3.255273 1.165246 -0.631638  
H 1.908220 1.295301 -1.752805  
C 1.943351 -0.007889 1.458758  
H 3.032785 0.005285 1.505623  
H 1.591050 0.865868 1.993519  
H 1.613245 -0.898844 1.979186  
H 0.023756 -0.000487 -1.345098

49

30H+ SCF Done: -758.907034700 A.U.

C -2.039944 -1.266210 -0.021576  
C -3.393028 -0.658357 -0.260499  
C -3.392983 0.658476 -0.260185  
C -2.039776 1.266170 -0.021513  
H -4.256009 -1.297079 -0.380431  
H -4.255906 1.297311 -0.379908  
N -1.112921 0.000043 -0.201760  
C -1.732012 -2.316346 -1.089815  
H -0.782387 -2.819779 -0.935960

|   |           |           |           |
|---|-----------|-----------|-----------|
| H | -2.516313 | -3.072359 | -1.051599 |
| H | -1.748441 | -1.879382 | -2.089355 |
| C | -1.978882 | -1.844895 | 1.394001  |
| H | -2.759530 | -2.602182 | 1.469502  |
| H | -1.030924 | -2.326533 | 1.619391  |
| H | -2.184252 | -1.089432 | 2.148972  |
| C | -1.732168 | 2.316316  | -1.090038 |
| H | -2.516562 | 3.072205  | -1.051724 |
| H | -0.782556 | 2.819854  | -0.936437 |
| H | -1.748755 | 1.879062  | -2.089438 |
| C | -1.978316 | 1.845030  | 1.393923  |
| H | -1.030292 | 2.326751  | 1.618958  |
| H | -2.758994 | 2.602258  | 1.469639  |
| H | -2.183306 | 1.089655  | 2.149098  |
| C | 0.229057  | 0.000017  | 0.541284  |
| H | -0.043710 | 0.000181  | 1.593930  |
| C | 1.088158  | 1.249048  | 0.235319  |
| C | 1.088184  | -1.249033 | 0.235733  |
| H | 0.520323  | 2.155680  | 0.414364  |
| C | 1.614224  | 1.242372  | -1.210436 |
| C | 2.281926  | 1.244917  | 1.210715  |
| H | 0.520460  | -2.155671 | 0.415091  |
| C | 1.614288  | -1.242881 | -1.210026 |
| C | 2.281948  | -1.244498 | 1.211149  |
| H | 2.192618  | 2.154213  | -1.376031 |
| H | 0.796028  | 1.267341  | -1.935715 |
| C | 2.482977  | -0.000273 | -1.446247 |
| H | 1.922515  | 1.274756  | 2.243097  |
| H | 2.867097  | 2.153141  | 1.048632  |
| C | 3.146859  | 0.000176  | 0.978981  |
| H | 0.796085  | -1.268203 | -1.935291 |
| H | 2.192747  | -2.154753 | -1.375225 |
| H | 1.922540  | -1.273956 | 2.243542  |
| H | 2.867143  | -2.152766 | 1.049405  |
| H | 2.851335  | -0.000418 | -2.474322 |
| C | 3.668555  | -0.000077 | -0.467377 |
| H | 3.986890  | 0.000295  | 1.677007  |
| H | 4.294212  | -0.880127 | -0.639728 |
| H | 4.294166  | 0.879945  | -0.640047 |
| H | -0.890178 | -0.000025 | -1.197459 |

55

31H+ SCF Done: -912.623433853 A.U.

|   |           |           |           |
|---|-----------|-----------|-----------|
| C | 1.228731  | 1.275691  | 0.129152  |
| C | 2.607649  | 0.689785  | -0.045610 |
| C | 2.607599  | -0.689758 | -0.045516 |
| C | 1.228537  | -1.275488 | 0.129105  |
| N | 0.321867  | -0.000056 | -0.103835 |
| C | 0.948381  | 2.325791  | -0.946613 |
| H | -0.017787 | 2.806697  | -0.836813 |
| H | 1.708403  | 3.101802  | -0.868544 |
| H | 1.025221  | 1.895345  | -1.946054 |
| C | 1.081780  | 1.837954  | 1.545001  |

|   |           |           |           |
|---|-----------|-----------|-----------|
| H | 1.826612  | 2.624963  | 1.658825  |
| H | 0.106246  | 2.277448  | 1.733970  |
| H | 1.287621  | 1.085256  | 2.302649  |
| C | 0.948418  | -2.325688 | -0.946872 |
| H | 1.708534  | -3.101570 | -0.868901 |
| H | -0.017708 | -2.806721 | -0.837106 |
| H | 1.025096  | -1.895053 | -1.946240 |
| C | 1.081498  | -1.838030 | 1.544865  |
| H | 0.105809  | -2.277181 | 1.733826  |
| H | 1.825996  | -2.625380 | 1.658430  |
| H | 1.287671  | -1.085583 | 2.302678  |
| C | -1.064915 | -0.000010 | 0.564383  |
| H | -0.848853 | -0.000089 | 1.630094  |
| C | -1.909727 | -1.248081 | 0.214027  |
| C | -1.909716 | 1.248058  | 0.214236  |
| H | -1.356827 | -2.156323 | 0.426013  |
| C | -2.358737 | -1.242622 | -1.257577 |
| C | -3.154647 | -1.242687 | 1.124292  |
| H | -1.356853 | 2.156302  | 0.426403  |
| C | -2.358776 | 1.242845  | -1.257368 |
| C | -3.154624 | 1.242451  | 1.124542  |
| H | -2.928640 | -2.154176 | -1.451803 |
| H | -1.504224 | -1.269360 | -1.939487 |
| C | -3.212774 | 0.000132  | -1.540425 |
| H | -2.850952 | -1.269959 | 2.174664  |
| H | -3.728127 | -2.152474 | 0.932095  |
| C | -4.006903 | -0.000085 | 0.844924  |
| H | -1.504262 | 1.269691  | -1.939249 |
| H | -2.928706 | 2.154413  | -1.451433 |
| H | -2.850927 | 1.269510  | 2.174920  |
| H | -3.728112 | 2.152276  | 0.932546  |
| H | -3.524460 | 0.000206  | -2.587059 |
| C | -4.449778 | 0.000063  | -0.627332 |
| H | -4.883364 | -0.000128 | 1.496605  |
| H | -5.065175 | 0.880143  | -0.833132 |
| H | -5.065198 | -0.879958 | -0.833309 |
| C | 3.798073  | -1.400215 | -0.153012 |
| C | 3.798153  | 1.400145  | -0.153361 |
| C | 4.991335  | -0.697283 | -0.264317 |
| C | 4.991367  | 0.697114  | -0.264533 |
| H | 3.805264  | -2.482243 | -0.147803 |
| H | 5.925260  | -1.236505 | -0.351739 |
| H | 5.925299  | 1.236277  | -0.352256 |
| H | 3.805409  | 2.482178  | -0.148485 |
| H | 0.153115  | 0.000093  | -1.109413 |

67

32H+ SCF Done: -1069.92041166 A.U.

|   |          |           |           |
|---|----------|-----------|-----------|
| C | 1.100112 | 1.302265  | 0.042276  |
| C | 2.465246 | 0.679718  | -0.145240 |
| C | 2.434377 | -0.697296 | -0.232250 |
| C | 1.060820 | -1.287556 | 0.002591  |
| N | 0.157529 | 0.020764  | -0.185614 |



|   |           |           |           |
|---|-----------|-----------|-----------|
| C | 0.768619  | 2.302879  | -1.090911 |
| H | -0.274835 | 2.586615  | -1.023404 |
| H | 0.888743  | 1.779092  | -2.043540 |
| C | 1.061648  | 1.890996  | 1.476342  |
| H | 2.011613  | 2.420503  | 1.551094  |
| H | 1.155495  | 1.069235  | 2.186257  |
| C | 0.778482  | -2.356438 | -1.098755 |
| H | 1.760455  | -2.715255 | -1.396477 |
| H | 0.408539  | -1.843603 | -1.989834 |
| C | 0.938441  | -1.793625 | 1.457929  |
| H | -0.041338 | -2.238377 | 1.609853  |
| H | 0.997689  | -0.938374 | 2.129337  |
| C | -1.233867 | 0.054534  | 0.483238  |
| H | -1.013661 | 0.126481  | 1.545291  |
| C | -2.081379 | -1.211311 | 0.231137  |
| C | -2.100076 | 1.266007  | 0.056253  |
| H | -1.517033 | -2.096305 | 0.488888  |
| C | -2.575379 | -1.312691 | -1.223218 |
| C | -3.304534 | -1.154085 | 1.169890  |
| H | -1.555830 | 2.189478  | 0.186548  |
| C | -2.586482 | 1.156637  | -1.399237 |
| C | -3.324482 | 1.321711  | 0.992761  |
| H | -3.147553 | -2.236875 | -1.333101 |
| H | -1.744229 | -1.382874 | -1.928549 |
| C | -3.445732 | -0.100865 | -1.571630 |
| H | -2.976485 | -1.107131 | 2.212047  |
| H | -3.872894 | -2.080043 | 1.054577  |
| C | -4.175844 | 0.059241  | 0.826939  |
| H | -1.750744 | 1.134134  | -2.105296 |
| H | -3.160770 | 2.054287  | -1.640238 |
| H | -3.002938 | 1.425721  | 2.032671  |
| H | -3.906119 | 2.213706  | 0.748343  |
| H | -3.784171 | -0.177039 | -2.607165 |
| C | -4.658086 | -0.043934 | -0.628760 |
| H | -5.033876 | 0.100783  | 1.501475  |
| H | -5.285168 | 0.816639  | -0.877389 |
| H | -5.272142 | -0.939415 | -0.758089 |
| C | 3.611160  | -1.415993 | -0.436890 |
| C | 3.683482  | 1.357263  | -0.184829 |
| C | 4.820348  | -0.741503 | -0.518985 |
| C | 4.857506  | 0.643133  | -0.377099 |
| H | 3.598820  | -2.493867 | -0.512771 |
| H | 5.735370  | -1.296860 | -0.676574 |
| H | 5.802922  | 1.167812  | -0.416463 |
| H | 3.731574  | 2.427176  | -0.055131 |
| C | 1.593771  | 3.591690  | -1.144026 |
| H | 2.603505  | 3.421528  | -1.508871 |
| H | 1.111913  | 4.282913  | -1.835853 |
| H | 1.654790  | 4.088043  | -0.175817 |
| C | -0.025219 | 2.858286  | 1.947022  |
| H | -0.239818 | 3.636763  | 1.215130  |
| H | -0.956928 | 2.365108  | 2.209388  |

|   |           |           |           |
|---|-----------|-----------|-----------|
| H | 0.334100  | 3.356146  | 2.848678  |
| C | 2.005140  | -2.804766 | 1.884327  |
| H | 2.986905  | -2.343040 | 1.969861  |
| H | 1.738734  | -3.207306 | 2.861778  |
| H | 2.086337  | -3.642955 | 1.192491  |
| C | -0.062650 | -3.607367 | -0.825855 |
| H | 0.179547  | -4.067414 | 0.130579  |
| H | -1.133711 | -3.440081 | -0.858879 |
| H | 0.166026  | -4.340904 | -1.600067 |
| H | -0.018077 | 0.038635  | -1.189606 |

41

33H+ SCF Done: -528.954524181 A.U.

|   |           |           |           |
|---|-----------|-----------|-----------|
| N | -0.214404 | -0.119568 | -0.265809 |
| C | -1.150028 | 1.200780  | -0.044603 |
| C | -2.620988 | 0.908506  | -0.375686 |
| H | -3.079265 | 0.187155  | 0.298050  |
| H | -3.157490 | 1.848115  | -0.248419 |
| H | -2.772149 | 0.599216  | -1.409306 |
| C | -1.098163 | 1.730242  | 1.384415  |
| H | -0.127822 | 2.126909  | 1.661705  |
| H | -1.806663 | 2.555859  | 1.446098  |
| H | -1.405154 | 0.981143  | 2.110681  |
| C | 1.168224  | -0.237325 | 0.530301  |
| C | 2.055773  | 0.983300  | 0.204960  |
| H | 1.560326  | 1.898940  | 0.515789  |
| H | 2.913903  | 0.887637  | 0.873723  |
| C | 1.898312  | -1.495196 | 0.044726  |
| H | 1.965730  | -1.562238 | -1.037519 |
| H | 2.916107  | -1.441569 | 0.430371  |
| H | 1.454874  | -2.406676 | 0.433328  |
| C | 1.001801  | -0.337590 | 2.053836  |
| H | 0.159964  | -0.946008 | 2.359662  |
| H | 1.901473  | -0.812745 | 2.444085  |
| H | 0.921473  | 0.630691  | 2.534181  |
| C | -0.668002 | 2.255271  | -1.047383 |
| H | 0.334192  | 2.618719  | -0.850528 |
| H | -0.715667 | 1.879425  | -2.071568 |
| H | -1.339486 | 3.110982  | -0.987231 |
| C | -1.047245 | -1.426832 | -0.449178 |
| C | -1.401922 | -2.150474 | 0.837881  |
| H | -2.156195 | -2.898397 | 0.590322  |
| H | -0.556819 | -2.674133 | 1.278572  |
| H | -1.835275 | -1.484628 | 1.582872  |
| C | -0.506585 | -2.361283 | -1.534870 |
| H | -1.351256 | -2.954955 | -1.886640 |
| H | -0.123471 | -1.811119 | -2.396063 |
| H | 0.255790  | -3.051630 | -1.190367 |
| H | -1.966467 | -1.050107 | -0.865119 |
| C | 2.574425  | 1.111388  | -1.228168 |
| H | 3.086354  | 2.066731  | -1.346217 |
| H | 3.286531  | 0.324089  | -1.471022 |
| H | 1.784866  | 1.084224  | -1.982108 |

H 0.118816 0.046633 -1.214053  
44

34H+ SCF Done: -568.281188048 A.U.

N 0.023451 0.166081 -0.118812  
C 1.102748 -0.905143 0.463318  
C 2.557471 -0.397402 0.289787  
H 2.723200 0.499724 0.886981  
H 3.161466 -1.162555 0.780171  
C 0.872925 -1.168075 1.946835  
H -0.041430 -1.720228 2.135311  
H 1.695829 -1.784429 2.306758  
H 0.866429 -0.251881 2.533327  
C -1.529764 0.020636 0.267014  
C -2.058130 -1.376576 -0.117659  
H -1.546879 -2.138482 0.463558  
H -3.084865 -1.387363 0.255271  
C -2.313474 1.058080 -0.547711  
H -2.082875 1.030369 -1.609665  
H -3.370369 0.816166 -0.440848  
H -2.177835 2.069716 -0.179186  
C -1.821854 0.240736 1.758961  
H -1.235121 1.027402 2.213325  
H -2.869222 0.530364 1.841104  
H -1.695486 -0.663207 2.344773  
C 0.985715 -2.204174 -0.343587  
H 0.090325 -2.772598 -0.127812  
H 1.041275 -2.031144 -1.417454  
H 1.835457 -2.832359 -0.077847  
C 0.582212 1.627922 -0.174624  
C 0.328177 2.496455 1.045984  
H 0.926143 3.399449 0.915774  
H -0.707370 2.806740 1.154795  
H 0.660917 2.020822 1.967004  
C 0.265880 2.338451 -1.493346  
H 1.028662 3.105519 -1.631405  
H 0.333342 1.665211 -2.350289  
H -0.700432 2.830729 -1.512180  
H 1.644200 1.468231 -0.202754  
C -2.085323 -1.743159 -1.601071  
H -2.391465 -2.783540 -1.712968  
H -2.796357 -1.130497 -2.153768  
H -1.115472 -1.648324 -2.090736  
C 3.094176 -0.232024 -1.135686  
H 4.085681 0.219710 -1.099447  
H 3.191552 -1.194085 -1.636700  
H 2.473681 0.403973 -1.768559  
H 0.008309 -0.090362 -1.104137

47

35H+ SCF Done: -607.619526563 A.U.

N -0.777553 0.175820 0.042752  
C 0.210562 -0.963559 0.572331  
C 1.630852 -0.387971 0.858974

|   |           |           |           |
|---|-----------|-----------|-----------|
| H | 1.566404  | 0.334624  | 1.669478  |
| H | 2.148475  | -1.235125 | 1.314061  |
| C | -0.344437 | -1.503759 | 1.889670  |
| H | -1.354429 | -1.889956 | 1.782072  |
| H | 0.287007  | -2.328793 | 2.217569  |
| H | -0.338586 | -0.751157 | 2.676882  |
| C | -2.293270 | -0.158798 | -0.400520 |
| C | -2.534990 | -1.619057 | -0.790573 |
| H | -2.404013 | -2.314768 | 0.032378  |
| H | -3.579819 | -1.680415 | -1.093812 |
| H | -1.938679 | -1.931952 | -1.641548 |
| C | -2.543449 | 0.678141  | -1.661805 |
| H | -1.872767 | 0.368888  | -2.465891 |
| H | -3.563207 | 0.494755  | -1.998447 |
| H | -2.437123 | 1.745636  | -1.508941 |
| C | -3.268113 | 0.191378  | 0.725379  |
| H | -3.310031 | 1.251076  | 0.957699  |
| H | -4.263950 | -0.099769 | 0.393943  |
| H | -3.053325 | -0.363998 | 1.637022  |
| C | 0.349686  | -2.085564 | -0.463768 |
| H | -0.446151 | -2.815638 | -0.408364 |
| H | 0.411097  | -1.706524 | -1.482925 |
| H | 1.276230  | -2.614859 | -0.256272 |
| C | -0.715440 | 1.398034  | 0.954129  |
| C | -1.126538 | 2.733497  | 0.353171  |
| H | -0.807031 | 3.505626  | 1.054061  |
| H | -0.626198 | 2.927184  | -0.595541 |
| H | -2.197431 | 2.845119  | 0.212825  |
| H | 0.315157  | 1.489523  | 1.258275  |
| H | -1.291342 | 1.166809  | 1.842375  |
| C | 2.602086  | 0.182205  | -0.224392 |
| C | 3.686625  | 0.941046  | 0.565274  |
| H | 4.178410  | 0.282014  | 1.284280  |
| H | 4.450124  | 1.331670  | -0.109638 |
| H | 3.259504  | 1.782464  | 1.115469  |
| C | 1.954527  | 1.163897  | -1.212041 |
| H | 1.235388  | 0.674694  | -1.875655 |
| H | 1.473207  | 2.002521  | -0.708644 |
| H | 2.720221  | 1.585976  | -1.865043 |
| C | 3.302496  | -0.927212 | -1.030672 |
| H | 3.735057  | -1.681842 | -0.370582 |
| H | 2.634038  | -1.428288 | -1.728235 |
| H | 4.114750  | -0.494580 | -1.618181 |
| H | -0.341709 | 0.464674  | -0.830871 |

50

36H+ SCF Done: -646.938716823 A.U.

|   |           |           |           |
|---|-----------|-----------|-----------|
| N | -0.759403 | 0.036349  | -0.140278 |
| C | 0.271851  | -0.945877 | 0.620904  |
| C | 1.640528  | -0.246622 | 0.861784  |
| H | 1.478712  | 0.635700  | 1.476980  |
| H | 2.147367  | -0.938379 | 1.538381  |
| C | -0.269736 | -1.359438 | 1.995309  |

|   |           |           |           |
|---|-----------|-----------|-----------|
| H | -1.326269 | -1.602161 | 1.983771  |
| H | 0.265912  | -2.255251 | 2.308634  |
| H | -0.099341 | -0.602997 | 2.755861  |
| C | -2.275666 | -0.433234 | -0.426676 |
| C | -2.449447 | -1.956512 | -0.478444 |
| H | -2.217770 | -2.464140 | 0.451109  |
| H | -3.505847 | -2.131812 | -0.678229 |
| H | -1.893256 | -2.407984 | -1.295176 |
| C | -2.642052 | 0.072610  | -1.831966 |
| H | -1.915942 | -0.256548 | -2.578001 |
| H | -3.601214 | -0.366396 | -2.103877 |
| H | -2.751168 | 1.146985  | -1.897499 |
| C | -3.229594 | 0.134238  | 0.620889  |
| H | -3.332051 | 1.212197  | 0.551823  |
| H | -4.214745 | -0.292055 | 0.435429  |
| H | -2.941114 | -0.131465 | 1.635281  |
| C | 0.506176  | -2.198653 | -0.236211 |
| H | -0.271765 | -2.940961 | -0.127545 |
| H | 0.631637  | -1.974936 | -1.294306 |
| H | 1.426900  | -2.659946 | 0.111541  |
| C | -0.568329 | 1.532053  | 0.274740  |
| C | -1.109024 | 2.537666  | -0.735883 |
| H | -0.659530 | 3.499397  | -0.485021 |
| H | -0.822217 | 2.303075  | -1.760587 |
| H | -2.187255 | 2.663402  | -0.683984 |
| H | 0.504692  | 1.625326  | 0.216342  |
| C | 2.686442  | 0.096416  | -0.258117 |
| C | 3.580215  | 1.201485  | 0.336323  |
| H | 4.030100  | 0.875661  | 1.276803  |
| H | 4.387800  | 1.455046  | -0.352702 |
| H | 3.009018  | 2.111974  | 0.533705  |
| C | 2.109113  | 0.611064  | -1.588207 |
| H | 1.473254  | -0.124856 | -2.084473 |
| H | 1.556865  | 1.544486  | -1.481272 |
| H | 2.928517  | 0.816840  | -2.278995 |
| C | 3.587123  | -1.114274 | -0.572847 |
| H | 3.999293  | -1.547049 | 0.340995  |
| H | 3.060462  | -1.898406 | -1.113979 |
| H | 4.424289  | -0.797608 | -1.198023 |
| C | -0.965389 | 1.915704  | 1.698066  |
| H | -0.397353 | 2.812572  | 1.948340  |
| H | -2.017792 | 2.162139  | 1.794500  |
| H | -0.720977 | 1.163365  | 2.437624  |
| H | -0.366660 | 0.030585  | -1.079491 |

47

37H+ SCF Done: -682.685366770 A.U.

|   |          |           |           |
|---|----------|-----------|-----------|
| N | 1.311156 | -0.050689 | -0.207512 |
| C | 2.021751 | -1.410295 | -0.093883 |
| C | 3.071254 | -1.557558 | -1.188739 |
| H | 3.937655 | -0.913648 | -1.044003 |
| H | 3.424321 | -2.588471 | -1.177960 |
| H | 2.649545 | -1.365455 | -2.176885 |

|   |           |           |           |
|---|-----------|-----------|-----------|
| H | 1.244395  | -2.137161 | -0.302513 |
| C | 2.563511  | -1.649875 | 1.305051  |
| H | 1.793894  | -1.544784 | 2.068887  |
| H | 2.938825  | -2.671644 | 1.353000  |
| H | 3.391998  | -0.984137 | 1.545386  |
| C | 2.293081  | 1.133349  | 0.034943  |
| C | -0.026173 | 0.039284  | 0.551095  |
| H | 0.247224  | 0.204299  | 1.588998  |
| C | -0.874396 | -1.245899 | 0.456657  |
| C | -0.867546 | 1.225954  | 0.031550  |
| H | -0.311724 | -2.102738 | 0.824191  |
| C | -1.354225 | -1.490526 | -0.984858 |
| C | -2.096030 | -1.067736 | 1.380187  |
| H | -0.288388 | 2.145111  | 0.071571  |
| C | -1.349456 | 0.974073  | -1.408644 |
| C | -2.089600 | 1.385372  | 0.955785  |
| H | -1.939372 | -2.412192 | -1.012887 |
| H | -0.511525 | -1.644201 | -1.667379 |
| C | -2.204936 | -0.300753 | -1.458106 |
| H | -1.766351 | -0.914346 | 2.411537  |
| H | -2.680036 | -1.990940 | 1.364130  |
| C | -2.949177 | 0.115888  | 0.908629  |
| H | -0.512499 | 0.894023  | -2.111499 |
| H | -1.928833 | 1.838406  | -1.740488 |
| H | -1.762253 | 1.585930  | 1.979814  |
| H | -2.667158 | 2.252630  | 0.627646  |
| H | -2.539892 | -0.476448 | -2.482461 |
| C | -3.422350 | -0.135779 | -0.532550 |
| H | -3.812337 | 0.232121  | 1.567603  |
| H | -4.040476 | 0.698316  | -0.875545 |
| H | -4.043413 | -1.034813 | -0.570581 |
| H | 3.271412  | 0.665614  | 0.000765  |
| C | 2.153908  | 1.788820  | 1.401322  |
| H | 1.236705  | 2.363901  | 1.509195  |
| H | 2.219384  | 1.069536  | 2.215475  |
| H | 2.989573  | 2.480422  | 1.510120  |
| C | 2.221605  | 2.120856  | -1.123338 |
| H | 1.270710  | 2.648276  | -1.168007 |
| H | 3.009146  | 2.862710  | -0.992092 |
| H | 2.394997  | 1.627015  | -2.081085 |
| H | 1.059060  | 0.016443  | -1.192964 |

62

38H+ SCF Done: -954.355990502 A.U.

|   |           |          |           |
|---|-----------|----------|-----------|
| N | 0.067898  | 0.921251 | -0.145903 |
| C | -0.144693 | 2.458966 | -0.052944 |
| C | -0.956772 | 3.012310 | -1.213432 |
| H | -2.012100 | 2.766389 | -1.164721 |
| H | -0.871250 | 4.099075 | -1.185653 |
| H | -0.559907 | 2.679404 | -2.174378 |
| H | 0.868877  | 2.821516 | -0.203098 |
| C | -0.589328 | 2.955810 | 1.315035  |
| H | -0.062459 | 2.458481 | 2.129045  |

|   |           |           |           |
|---|-----------|-----------|-----------|
| H | -0.343509 | 4.016597  | 1.368633  |
| H | -1.657863 | 2.859531  | 1.476513  |
| C | 1.508202  | 0.657180  | 0.423201  |
| H | 1.604940  | 1.401628  | 1.209654  |
| C | 2.541979  | 0.937529  | -0.688461 |
| C | 1.811909  | -0.713883 | 1.052267  |
| H | 2.316244  | 1.883166  | -1.185914 |
| C | 2.559727  | -0.198718 | -1.727008 |
| C | 3.927341  | 1.050067  | -0.025687 |
| H | 1.092827  | -0.938897 | 1.841056  |
| C | 1.868616  | -1.848136 | 0.013747  |
| C | 3.202310  | -0.584089 | 1.718944  |
| H | 3.283355  | 0.049828  | -2.506292 |
| H | 1.593536  | -0.294722 | -2.235578 |
| C | 2.929378  | -1.526555 | -1.048978 |
| H | 3.931241  | 1.870983  | 0.696353  |
| H | 4.669705  | 1.289358  | -0.790484 |
| C | 4.275054  | -0.275549 | 0.664684  |
| H | 0.902767  | -2.005135 | -0.467831 |
| H | 2.113144  | -2.781738 | 0.525318  |
| H | 3.182371  | 0.197099  | 2.483725  |
| H | 3.428398  | -1.523995 | 2.227332  |
| H | 2.949684  | -2.323625 | -1.795171 |
| C | 4.308494  | -1.401347 | -0.381709 |
| H | 5.249411  | -0.191060 | 1.150838  |
| H | 4.578288  | -2.348275 | 0.093779  |
| H | 5.071812  | -1.188819 | -1.135207 |
| C | -1.008522 | -0.141630 | 0.256598  |
| H | -0.411624 | -0.860162 | 0.794787  |
| C | -1.564325 | -0.861797 | -0.988721 |
| C | -2.169137 | 0.209800  | 1.205737  |
| H | -0.754290 | -1.042908 | -1.702339 |
| C | -2.696316 | -0.077337 | -1.668558 |
| C | -2.114585 | -2.218634 | -0.502813 |
| H | -1.800285 | 0.757071  | 2.070140  |
| C | -3.329350 | 0.956808  | 0.528918  |
| C | -2.711061 | -1.159052 | 1.693077  |
| H | -3.052207 | -0.651063 | -2.527557 |
| H | -2.334346 | 0.871924  | -2.063212 |
| C | -3.846700 | 0.152051  | -0.673627 |
| H | -1.316989 | -2.811484 | -0.047069 |
| H | -2.484555 | -2.783522 | -1.361396 |
| C | -3.247648 | -1.977994 | 0.507110  |
| H | -3.040893 | 1.956785  | 0.216449  |
| H | -4.129754 | 1.088187  | 1.261332  |
| H | -1.926122 | -1.713633 | 2.214356  |
| H | -3.508832 | -0.978504 | 2.416980  |
| H | -4.646291 | 0.709783  | -1.166081 |
| C | -4.381353 | -1.202679 | -0.183152 |
| H | -3.621038 | -2.938250 | 0.869975  |
| H | -5.209043 | -1.046605 | 0.514059  |
| H | -4.772057 | -1.781117 | -1.024929 |

H 0.164212 0.759236 -1.147457  
69  
39H+ SCF Done: -954.355990502 A.U.  
N 0.094764 0.406811 -0.160108  
C 1.554066 0.374541 0.420316  
H 1.522777 1.117414 1.213558  
C 2.535339 0.824360 -0.683643  
C 2.070635 -0.936007 1.040488  
H 2.164304 1.725817 -1.175580  
C 2.734648 -0.287239 -1.729814  
C 3.883668 1.149725 -0.014979  
H 1.394859 -1.279625 1.824510  
C 2.309821 -2.038441 -0.006638  
C 3.420514 -0.591876 1.714057  
H 3.407496 0.079014 -2.508005  
H 1.795355 -0.536109 -2.236980  
C 3.310388 -1.544220 -1.061046  
H 3.756933 1.955958 0.712757  
H 4.580702 1.508604 -0.775730  
C 4.434690 -0.109275 0.667383  
H 1.382168 -2.340378 -0.495044  
H 2.695734 -2.926585 0.498716  
H 3.273802 0.171832 2.482479  
H 3.790878 -1.487102 2.218382  
H 3.459321 -2.321505 -1.813533  
C 4.649978 -1.207202 -0.386906  
H 5.381579 0.124637 1.158855  
H 5.064887 -2.103119 0.082897  
H 5.372508 -0.870700 -1.135483  
C -0.802957 -0.806996 0.244431  
H -0.097666 -1.429364 0.770807  
C -1.257245 -1.604105 -0.995197  
C -1.989549 -0.638074 1.210326  
H -0.438919 -1.657431 -1.720350  
C -2.508089 -1.008385 -1.658015  
C -1.580514 -3.029300 -0.500258  
H -1.693845 -0.036815 2.067877  
C -3.260848 -0.081901 0.547786  
C -2.305170 -2.072734 1.706191  
H -2.781964 -1.631164 -2.513008  
H -2.306450 -0.013498 -2.054972  
C -3.664768 -0.961832 -0.645253  
H -0.692096 -3.487574 -0.057590  
H -1.870655 -3.648122 -1.352267  
C -2.721894 -2.967978 0.527209  
H -3.131653 0.947462 0.224707  
H -4.061980 -0.069460 1.291040  
H -1.436609 -2.496586 2.217907  
H -3.112622 -2.017503 2.439735  
H -4.549478 -0.537116 -1.124714  
C -3.973221 -2.382083 -0.146373  
H -2.934161 -3.974468 0.894760



|   |           |           |           |
|---|-----------|-----------|-----------|
| H | -4.804581 | -2.355323 | 0.563374  |
| H | -4.280977 | -3.017194 | -0.981652 |
| C | -0.352743 | 1.889559  | -0.087531 |
| C | -1.239363 | 2.319048  | -1.252188 |
| C | -0.879920 | 2.362089  | 1.263709  |
| H | 0.594077  | 2.404945  | -0.241458 |
| C | -1.348254 | 3.851345  | -1.255970 |
| H | -2.235851 | 1.891097  | -1.172722 |
| H | -0.810937 | 1.976443  | -2.198044 |
| C | -0.965036 | 3.895431  | 1.243623  |
| H | -1.872775 | 1.967392  | 1.458153  |
| H | -0.230685 | 2.029307  | 2.074961  |
| C | -1.843992 | 4.385564  | 0.090119  |
| H | -2.016852 | 4.159741  | -2.061350 |
| H | -0.365964 | 4.280855  | -1.478855 |
| H | -1.360144 | 4.242716  | 2.199723  |
| H | 0.040367  | 4.317295  | 1.144447  |
| H | -1.865477 | 5.477043  | 0.072336  |
| H | -2.874217 | 4.052746  | 0.255316  |
| H | 0.224341  | 0.254683  | -1.160174 |

54

40H+ SCF Done: -799.465897242 A.U.

|   |           |           |           |
|---|-----------|-----------|-----------|
| N | -0.521324 | 0.565377  | -0.286365 |
| C | -0.718931 | 2.095765  | -0.308382 |
| C | -1.788736 | 2.511634  | -1.308379 |
| H | -2.795145 | 2.264652  | -0.978383 |
| H | -1.733432 | 3.595165  | -1.415522 |
| H | -1.619450 | 2.074112  | -2.293054 |
| H | 0.229363  | 2.440750  | -0.708324 |
| C | -0.911006 | 2.735296  | 1.063618  |
| H | -0.295243 | 2.280769  | 1.836767  |
| H | -0.610801 | 3.780204  | 0.980438  |
| H | -1.945546 | 2.716228  | 1.392384  |
| C | 0.716710  | 0.099822  | 0.516270  |
| H | 0.361087  | 0.048709  | 1.545038  |
| C | 1.925984  | 1.055773  | 0.435709  |
| C | 1.175243  | -1.303444 | 0.050317  |
| H | 1.645214  | 2.059750  | 0.745798  |
| C | 2.533381  | 1.088781  | -0.979228 |
| C | 2.987357  | 0.540027  | 1.429768  |
| H | 0.343668  | -2.006656 | 0.060541  |
| C | 1.779962  | -1.254538 | -1.364220 |
| C | 2.240069  | -1.805660 | 1.043859  |
| H | 3.375991  | 1.783764  | -0.982482 |
| H | 1.820193  | 1.470996  | -1.716899 |
| C | 2.995564  | -0.318141 | -1.384012 |
| H | 2.578531  | 0.531990  | 2.444015  |
| H | 3.829753  | 1.235612  | 1.429577  |
| C | 3.451976  | -0.865372 | 1.028007  |
| H | 1.043317  | -0.929816 | -2.108153 |
| H | 2.067715  | -2.266986 | -1.655829 |
| H | 1.815883  | -1.865813 | 2.049909  |

|   |           |           |           |
|---|-----------|-----------|-----------|
| H | 2.537035  | -2.817592 | 0.758770  |
| H | 3.419624  | -0.288633 | -2.389931 |
| C | 4.051885  | -0.823661 | -0.387163 |
| H | 4.201482  | -1.221014 | 1.738393  |
| H | 4.392755  | -1.820753 | -0.678996 |
| H | 4.924915  | -0.165628 | -0.404712 |
| H | -0.298986 | 0.346794  | -1.258167 |
| C | -1.739138 | -0.337160 | 0.028779  |
| C | -2.677834 | 0.175561  | 1.115048  |
| C | -2.481882 | -0.722714 | -1.250954 |
| H | -1.286784 | -1.245004 | 0.417670  |
| C | -3.720971 | -0.908806 | 1.422253  |
| H | -3.197993 | 1.074205  | 0.785435  |
| H | -2.122595 | 0.422669  | 2.019858  |
| C | -3.538337 | -1.788480 | -0.935217 |
| H | -2.968932 | 0.147380  | -1.690583 |
| H | -1.775187 | -1.110141 | -1.990556 |
| C | -4.490889 | -1.318835 | 0.165967  |
| H | -4.404207 | -0.534967 | 2.186675  |
| H | -3.220089 | -1.784612 | 1.847756  |
| H | -4.089499 | -2.028163 | -1.846069 |
| H | -3.037945 | -2.708731 | -0.616514 |
| H | -5.206493 | -2.108192 | 0.404299  |
| H | -5.071384 | -0.463777 | -0.196836 |

41

41H+ SCF Done: -1063.59826443 A.U.

|   |           |           |           |
|---|-----------|-----------|-----------|
| N | 1.300287  | 0.252407  | -0.294959 |
| C | 2.594246  | -0.613816 | 0.018162  |
| C | 3.728857  | -0.066609 | -0.846638 |
| H | 4.057389  | 0.918852  | -0.526873 |
| H | 4.575080  | -0.746327 | -0.756663 |
| H | 3.449548  | -0.024593 | -1.900861 |
| C | 2.912929  | -0.506247 | 1.502512  |
| H | 2.127141  | -0.922224 | 2.131314  |
| H | 3.819501  | -1.081597 | 1.686178  |
| H | 3.103439  | 0.521689  | 1.804466  |
| C | -0.027377 | -0.273283 | 0.333290  |
| H | 0.323172  | -0.938182 | 1.115958  |
| C | -0.817681 | -1.066003 | -0.727723 |
| C | -0.946649 | 0.774797  | 0.983676  |
| H | -0.167073 | -1.769847 | -1.244179 |
| C | -1.485820 | -0.127387 | -1.747118 |
| C | -1.899816 | -1.858577 | 0.035187  |
| H | -0.377200 | 1.366193  | 1.700489  |
| C | -1.649182 | 1.682388  | -0.042566 |
| C | -2.024035 | -0.033104 | 1.744523  |
| H | -2.017010 | -0.736816 | -2.481280 |
| H | -0.743112 | 0.446976  | -2.312758 |
| C | -2.452278 | 0.829178  | -1.032803 |
| H | -1.434468 | -2.546593 | 0.746178  |
| H | -2.456385 | -2.466278 | -0.681553 |
| C | -2.840452 | -0.885951 | 0.760055  |

|    |           |           |           |
|----|-----------|-----------|-----------|
| H  | -0.937421 | 2.306742  | -0.581739 |
| H  | -2.311287 | 2.362450  | 0.498530  |
| H  | -1.559110 | -0.666984 | 2.504376  |
| H  | -2.674903 | 0.669706  | 2.268786  |
| H  | -2.930382 | 1.478470  | -1.769068 |
| C  | -3.520386 | 0.024359  | -0.275473 |
| H  | -3.594870 | -1.452122 | 1.310415  |
| H  | -4.214543 | 0.706675  | 0.222208  |
| H  | -4.105350 | -0.578510 | -0.975510 |
| Cl | 1.637664  | 1.970913  | 0.009955  |
| C  | 2.292197  | -2.057457 | -0.388357 |
| H  | 1.497485  | -2.510892 | 0.198808  |
| H  | 2.059461  | -2.145432 | -1.449532 |
| H  | 3.198635  | -2.632471 | -0.202599 |
| H  | 1.182659  | 0.235007  | -1.309977 |

50

42H+ SCF Done: -722.000102280 A.U.

|   |           |           |           |
|---|-----------|-----------|-----------|
| N | 1.258252  | 0.152804  | -0.252084 |
| C | 2.272808  | -1.081586 | -0.034466 |
| C | 3.721140  | -0.658995 | -0.317105 |
| H | 4.132249  | 0.003869  | 0.442067  |
| H | 4.322274  | -1.567196 | -0.303255 |
| H | 3.840044  | -0.209070 | -1.303157 |
| C | 2.195322  | -1.602792 | 1.399373  |
| H | 1.233073  | -2.031604 | 1.660641  |
| H | 2.939010  | -2.392809 | 1.501282  |
| H | 2.442517  | -0.829737 | 2.124472  |
| C | -0.096507 | 0.032428  | 0.501053  |
| H | 0.192769  | 0.053728  | 1.548377  |
| C | -0.877555 | -1.272564 | 0.216712  |
| C | -1.061076 | 1.212343  | 0.227927  |
| H | -0.252712 | -2.141130 | 0.384673  |
| C | -1.444469 | -1.302186 | -1.213229 |
| C | -2.041409 | -1.357752 | 1.225830  |
| H | -0.566147 | 2.159464  | 0.403709  |
| C | -1.630415 | 1.174147  | -1.200527 |
| C | -2.222700 | 1.115622  | 1.238588  |
| H | -1.956894 | -2.254696 | -1.367427 |
| H | -0.647965 | -1.260308 | -1.961564 |
| C | -2.411041 | -0.128207 | -1.417683 |
| H | -1.652049 | -1.361922 | 2.247878  |
| H | -2.558122 | -2.308707 | 1.075816  |
| C | -3.004292 | -0.183984 | 1.024533  |
| H | -0.840445 | 1.260956  | -1.950676 |
| H | -2.280072 | 2.041235  | -1.341750 |
| H | -1.835331 | 1.164250  | 2.260259  |
| H | -2.872596 | 1.982995  | 1.100607  |
| H | -2.807203 | -0.153055 | -2.435132 |
| C | -3.565267 | -0.219543 | -0.406362 |
| H | -3.821588 | -0.247691 | 1.746388  |
| H | -4.259804 | 0.611401  | -0.557751 |
| H | -4.127790 | -1.143769 | -0.564758 |

|   |          |           |           |
|---|----------|-----------|-----------|
| C | 1.924530 | -2.154313 | -1.074830 |
| H | 0.948336 | -2.602770 | -0.943755 |
| H | 1.988905 | -1.749240 | -2.086522 |
| H | 2.660655 | -2.953315 | -0.997462 |
| C | 1.946592 | 1.539499  | -0.088024 |
| H | 2.973812 | 1.339564  | -0.344750 |
| C | 1.941813 | 2.052480  | 1.344595  |
| H | 0.958863 | 2.351601  | 1.699911  |
| H | 2.355685 | 1.323774  | 2.039148  |
| H | 2.584384 | 2.932586  | 1.376867  |
| C | 1.490106 | 2.556972  | -1.132232 |
| H | 0.510463 | 2.986628  | -0.952386 |
| H | 2.214665 | 3.371954  | -1.119992 |
| H | 1.508199 | 2.129102  | -2.136345 |
| H | 1.039576 | 0.094870  | -1.245752 |

5

NH3H+ SCF Done: -57.0257019791 A.U.

|   |           |           |           |
|---|-----------|-----------|-----------|
| N | 0.000000  | 0.000000  | 0.000130  |
| H | 0.000000  | 0.963051  | 0.339953  |
| H | 0.834026  | -0.481525 | 0.339953  |
| H | -0.834026 | -0.481525 | 0.339953  |
| H | 0.000000  | 0.000000  | -1.020767 |

14

NMe3H+ SCF Done: -175.002430567 A.U.

|   |           |           |           |
|---|-----------|-----------|-----------|
| N | 0.000321  | -0.000008 | -0.339654 |
| C | -0.821962 | 1.172275  | 0.103634  |
| H | -0.372037 | 2.082213  | -0.283258 |
| H | -0.834012 | 1.189831  | 1.190178  |
| C | 1.426621  | 0.125340  | 0.103650  |
| H | 1.989854  | -0.717819 | -0.286124 |
| H | 1.448591  | 0.123139  | 1.190193  |
| C | -0.604744 | -1.297625 | 0.103652  |
| H | -0.619016 | -1.314606 | 1.190223  |
| H | -1.616036 | -1.363543 | -0.287640 |
| H | 0.000287  | -2.114774 | -0.278601 |
| H | -1.830868 | 1.057755  | -0.282575 |
| H | 1.831350  | 1.057703  | -0.279530 |
| H | 0.000152  | 0.000214  | -1.360903 |

23

NEt3H+ SCF Done: -293.001404450 A.U.

|   |           |           |           |
|---|-----------|-----------|-----------|
| N | 0.001849  | 0.000720  | 0.003384  |
| C | -0.461540 | 1.373785  | 0.447933  |
| H | 0.399714  | 2.033772  | 0.387635  |
| H | -0.740186 | 1.271571  | 1.495136  |
| C | -1.597828 | 1.907279  | -0.402693 |
| H | -2.490590 | 1.285330  | -0.350767 |
| H | -1.864393 | 2.899297  | -0.039240 |
| H | -1.296462 | 2.004619  | -1.446887 |
| C | 1.421471  | -0.282857 | 0.452807  |
| H | 1.558757  | -1.359529 | 0.406412  |
| H | 1.472558  | 0.021890  | 1.496717  |
| C | 2.453768  | 0.421611  | -0.406012 |

|   |           |           |           |
|---|-----------|-----------|-----------|
| H | 2.351099  | 1.505830  | -0.381030 |
| H | 3.445164  | 0.174178  | -0.027341 |
| H | 2.398766  | 0.086607  | -1.443100 |
| C | -0.955387 | -1.085810 | 0.452015  |
| H | -0.719766 | -1.280410 | 1.497384  |
| H | -1.956627 | -0.666523 | 0.401598  |
| C | -0.861264 | -2.334520 | -0.403777 |
| H | 0.124281  | -2.797271 | -0.366555 |
| H | -1.582333 | -3.062010 | -0.031976 |
| H | -1.111143 | -2.120275 | -1.444228 |
| H | 0.002909  | 0.000961  | -1.019087 |

12

PyH+ SCF Done: -248.827391169 A.U.

|   |           |           |           |
|---|-----------|-----------|-----------|
| C | -0.663721 | 1.182330  | -0.000199 |
| C | 0.713927  | 1.204900  | -0.000129 |
| C | 1.409660  | -0.000219 | 0.000061  |
| C | 0.713550  | -1.205122 | 0.000202  |
| C | -0.664099 | -1.182128 | 0.000136  |
| N | -1.303507 | 0.000204  | -0.000065 |
| H | 2.490922  | -0.000378 | 0.000130  |
| H | -1.280072 | 2.067938  | -0.000350 |
| H | 1.228413  | 2.153905  | -0.000229 |
| H | 1.227741  | -2.154287 | 0.000359  |
| H | -1.280745 | -2.067540 | 0.000227  |
| H | -2.317615 | 0.000370  | -0.000103 |

29

1H+ SCF Done: -371.659699457 A.U.

|   |           |           |           |
|---|-----------|-----------|-----------|
| N | 0.019883  | 0.199607  | 0.205971  |
| C | 0.006493  | 1.503081  | -0.566761 |
| C | 1.217453  | 2.381280  | -0.312685 |
| H | -0.898553 | 2.028131  | -0.273422 |
| H | -0.078574 | 1.238619  | -1.617711 |
| H | 1.064471  | 3.321795  | -0.841778 |
| H | 1.333358  | 2.611705  | 0.747401  |
| H | 2.141351  | 1.941700  | -0.683948 |
| C | 1.209634  | -0.711176 | -0.228577 |
| C | 0.844897  | -2.171654 | -0.452319 |
| H | 1.540092  | -0.286619 | -1.174431 |
| H | 1.743378  | -2.668390 | -0.819292 |
| H | 0.552922  | -2.669607 | 0.472214  |
| H | 0.068751  | -2.314236 | -1.199805 |
| C | -1.376397 | -0.449213 | 0.265159  |
| C | -2.217390 | 0.260983  | 1.318415  |
| H | -1.190189 | -1.460146 | 0.613441  |
| H | -3.166816 | -0.265699 | 1.411579  |
| H | -1.733273 | 0.245330  | 2.296597  |
| H | -2.439064 | 1.293792  | 1.049389  |
| C | -2.054682 | -0.492097 | -1.096269 |
| H | -2.917009 | -1.153849 | -1.021464 |
| H | -2.416526 | 0.489342  | -1.400508 |
| H | -1.405544 | -0.879645 | -1.879461 |
| C | 2.311821  | -0.587422 | 0.817863  |

|   |          |           |          |
|---|----------|-----------|----------|
| H | 2.610572 | 0.443685  | 0.995853 |
| H | 1.992941 | -1.030485 | 1.764314 |
| H | 3.189863 | -1.133094 | 0.474340 |
| H | 0.217699 | 0.447729  | 1.175933 |

18

2H+ SCF Done: -252.468169751 A.U.

|   |           |           |           |
|---|-----------|-----------|-----------|
| C | -1.485419 | 0.080352  | 0.225356  |
| C | -0.676656 | 1.297822  | -0.228934 |
| C | 0.765435  | 1.220102  | 0.245093  |
| C | 0.628231  | -1.294508 | 0.243419  |
| C | -0.814834 | -1.218786 | -0.227930 |
| H | 1.377861  | 2.030645  | -0.144076 |
| H | -0.691484 | 1.372922  | -1.320196 |
| H | -1.108189 | 2.221808  | 0.157036  |
| H | -1.570987 | 0.085107  | 1.316001  |
| H | -2.497683 | 0.135998  | -0.175399 |
| H | 1.151091  | -2.165746 | -0.144337 |
| H | 0.697268  | -1.294008 | 1.330494  |
| H | -0.844535 | -1.298681 | -1.318693 |
| H | -1.341319 | -2.088914 | 0.165531  |
| H | 0.836531  | 1.213280  | 1.332072  |
| N | 1.387603  | -0.074401 | -0.226123 |
| H | 1.421528  | -0.073454 | -1.248447 |
| H | 2.356158  | -0.128051 | 0.090846  |

30

3H+ SCF Done: -409.800943853 A.U.

|   |           |           |           |
|---|-----------|-----------|-----------|
| C | -0.000050 | 1.952786  | 0.074589  |
| C | 1.256021  | 1.250608  | -0.438569 |
| C | 1.348223  | -0.224413 | -0.031686 |
| C | -1.348256 | -0.224409 | -0.031680 |
| C | -1.256047 | 1.250563  | -0.438673 |
| H | 1.279340  | 1.318881  | -1.530440 |
| H | 2.156851  | 1.746108  | -0.074378 |
| H | -0.000104 | 2.000894  | 1.164782  |
| H | -0.000049 | 2.985623  | -0.275190 |
| H | -1.279244 | 1.318736  | -1.530557 |
| H | -2.156928 | 1.746074  | -0.074616 |
| N | 0.000026  | -0.887112 | -0.397451 |
| H | -0.000014 | -0.987460 | -1.414439 |
| C | -1.641087 | -0.413427 | 1.455498  |
| H | -2.675682 | -0.123392 | 1.634507  |
| H | -1.534378 | -1.457638 | 1.753568  |
| H | -1.014989 | 0.197309  | 2.097747  |
| C | -2.401483 | -0.962268 | -0.859643 |
| H | -2.193908 | -0.896667 | -1.929225 |
| H | -2.467441 | -2.014552 | -0.576671 |
| H | -3.374392 | -0.505362 | -0.682668 |
| C | 2.401535  | -0.962148 | -0.859663 |
| H | 2.467582  | -2.014430 | -0.576703 |
| H | 2.193962  | -0.896556 | -1.929233 |
| H | 3.374405  | -0.505153 | -0.682658 |
| C | 1.641100  | -0.413526 | 1.455472  |

|   |          |           |           |
|---|----------|-----------|-----------|
| H | 1.015113 | 0.197277  | 2.097754  |
| H | 1.534204 | -1.457723 | 1.753484  |
| H | 2.675745 | -0.123671 | 1.634459  |
| H | 0.000012 | -1.841115 | -0.031240 |

21

4H+ SCF Done: -291.795089078 A.U.

|   |           |           |           |
|---|-----------|-----------|-----------|
| C | -1.909491 | 0.000012  | 0.269147  |
| C | -1.184917 | 1.255652  | -0.216099 |
| C | 0.277891  | 1.249935  | 0.197697  |
| C | 0.277911  | -1.249945 | 0.197652  |
| C | -1.184931 | -1.255655 | -0.216057 |
| H | 0.823523  | 2.098393  | -0.210614 |
| H | -1.254766 | 1.336399  | -1.304902 |
| H | -1.641473 | 2.156860  | 0.195077  |
| H | -1.946378 | 0.000042  | 1.362493  |
| H | -2.939807 | 0.000003  | -0.086928 |
| H | 0.823497  | -2.098392 | -0.210751 |
| H | 0.388818  | -1.251388 | 1.281997  |
| H | -1.254856 | -1.336462 | -1.304846 |
| H | -1.641453 | -2.156831 | 0.195227  |
| H | 0.388737  | 1.251282  | 1.282049  |
| N | 0.974834  | -0.000004 | -0.293513 |
| C | 2.427377  | 0.000011  | 0.058281  |
| H | 2.889725  | -0.891027 | -0.357411 |
| H | 2.889701  | 0.891054  | -0.357424 |
| H | 2.520747  | 0.000021  | 1.141017  |
| H | 0.907112  | 0.000013  | -1.314122 |

33

5H+ SCF Done: -449.11643974 A.U.

|   |           |           |           |
|---|-----------|-----------|-----------|
| C | -0.000005 | 2.166809  | 0.048870  |
| C | 1.243150  | 1.451787  | -0.458769 |
| C | 1.353189  | -0.015758 | -0.021080 |
| C | -1.353189 | -0.015765 | -0.021080 |
| C | -1.243155 | 1.451780  | -0.458771 |
| H | 1.257299  | 1.496323  | -1.552407 |
| H | 2.149411  | 1.953871  | -0.118253 |
| H | -0.000006 | 2.227879  | 1.138467  |
| H | -0.000007 | 3.195008  | -0.315106 |
| H | -1.257300 | 1.496312  | -1.552409 |
| H | -2.149419 | 1.953861  | -0.118260 |
| N | 0.000001  | -0.727700 | -0.392193 |
| C | 0.000010  | -2.184251 | -0.037571 |
| H | -0.880638 | -2.654202 | -0.457712 |
| H | 0.880693  | -2.654179 | -0.457666 |
| H | -0.000015 | -2.298493 | 1.038698  |
| H | 0.000001  | -0.693584 | -1.413536 |
| C | 2.458706  | -0.691213 | -0.842164 |
| H | 2.188677  | -0.781784 | -1.896368 |
| H | 3.348044  | -0.064380 | -0.786602 |
| H | 2.730898  | -1.672967 | -0.459713 |
| C | 1.673501  | -0.143546 | 1.466259  |
| H | 2.670510  | 0.269238  | 1.618681  |

|   |           |           |           |
|---|-----------|-----------|-----------|
| H | 0.991930  | 0.410068  | 2.103528  |
| H | 1.701592  | -1.179814 | 1.797868  |
| C | -2.458707 | -0.691219 | -0.842164 |
| H | -3.348045 | -0.064386 | -0.786599 |
| H | -2.188679 | -0.781784 | -1.896369 |
| H | -2.730897 | -1.672974 | -0.459716 |
| C | -1.673504 | -0.143554 | 1.466259  |
| H | -0.991907 | 0.410020  | 2.103532  |
| H | -2.670494 | 0.269273  | 1.618687  |
| H | -1.701642 | -1.179824 | 1.797856  |

39

6H+ SCF Done: -602.790039580 A.U.

|   |           |           |           |
|---|-----------|-----------|-----------|
| N | -0.544887 | -0.005951 | -0.372476 |
| C | -1.204134 | -1.419032 | 0.014719  |
| C | -0.483325 | -2.449315 | -0.861224 |
| H | -0.941652 | -3.421453 | -0.683637 |
| H | -0.590522 | -2.223438 | -1.923533 |
| H | 0.574257  | -2.529960 | -0.621273 |
| C | -1.236020 | 1.409114  | -0.020189 |
| C | -2.395582 | 1.626203  | -0.998851 |
| H | -2.715788 | 2.663122  | -0.905863 |
| H | -2.085709 | 1.478709  | -2.035473 |
| H | -3.257941 | 1.003091  | -0.795405 |
| C | -1.714617 | 1.465680  | 1.422678  |
| H | -2.130429 | 2.459828  | 1.588179  |
| H | -2.502173 | 0.747348  | 1.632322  |
| H | -0.904722 | 1.332188  | 2.136295  |
| C | 0.919577  | -0.006122 | -0.157190 |
| C | 1.735796  | -0.055034 | -1.279377 |
| C | 1.469878  | 0.070086  | 1.115197  |
| C | 3.116701  | -0.045674 | -1.128953 |
| H | 1.304475  | -0.098145 | -2.272207 |
| C | 2.851793  | 0.080963  | 1.257670  |
| H | 0.846405  | 0.136785  | 1.991212  |
| C | 3.677422  | 0.019024  | 0.140769  |
| H | 3.748336  | -0.086796 | -2.005903 |
| H | 3.279665  | 0.142262  | 2.249146  |
| H | 4.752532  | 0.026716  | 0.259936  |
| C | -1.012828 | -1.773749 | 1.485653  |
| H | -1.425079 | -1.033871 | 2.164271  |
| H | -1.547495 | -2.707850 | 1.658030  |
| H | 0.029969  | -1.950929 | 1.733959  |
| C | -2.686130 | -1.413328 | -0.350132 |
| H | -2.852125 | -1.137980 | -1.390808 |
| H | -3.056356 | -2.429571 | -0.219851 |
| H | -3.277991 | -0.770289 | 0.294785  |
| C | -0.193674 | 2.502829  | -0.278803 |
| H | 0.634157  | 2.473632  | 0.423874  |
| H | 0.204624  | 2.455456  | -1.292348 |
| H | -0.695698 | 3.462600  | -0.163038 |
| H | -0.645680 | -0.019668 | -1.387139 |

40



7H+ SCF Done: -695.066860902 A.U.

|   |           |           |           |
|---|-----------|-----------|-----------|
| N | -1.056909 | 0.044707  | 0.377432  |
| C | -1.598924 | 1.372644  | -0.359400 |
| C | -1.195217 | 2.531297  | 0.558102  |
| H | -1.602253 | 3.449001  | 0.135665  |
| H | -1.607745 | 2.420718  | 1.562430  |
| H | -0.116397 | 2.650488  | 0.628714  |
| C | -1.574677 | -1.445888 | 0.009231  |
| C | -2.952427 | -1.625720 | 0.653789  |
| H | -3.229332 | -2.674518 | 0.554181  |
| H | -2.929049 | -1.400401 | 1.722468  |
| H | -3.733352 | -1.040353 | 0.183974  |
| C | -1.625555 | -1.675385 | -1.493056 |
| H | -1.938271 | -2.707644 | -1.651160 |
| H | -2.348696 | -1.037809 | -1.993578 |
| H | -0.653581 | -1.560366 | -1.967623 |
| C | 0.399805  | 0.109241  | 0.605865  |
| C | 1.297390  | -0.081113 | -0.430986 |
| C | 0.851762  | 0.341269  | 1.898967  |
| C | 2.666240  | -0.020342 | -0.160454 |
| H | 0.967335  | -0.289901 | -1.434365 |
| C | 2.214545  | 0.401700  | 2.159699  |
| H | 0.148099  | 0.474905  | 2.710653  |
| C | 3.129871  | 0.225331  | 1.134796  |
| H | 4.191956  | 0.271066  | 1.328667  |
| H | 2.558824  | 0.585408  | 3.167571  |
| C | -0.981000 | 1.569282  | -1.739237 |
| H | -1.155826 | 0.736620  | -2.412925 |
| H | -1.458004 | 2.446578  | -2.176108 |
| H | 0.084032  | 1.780054  | -1.690531 |
| C | -3.120525 | 1.318352  | -0.451567 |
| H | -3.586705 | 1.161454  | 0.519907  |
| H | -3.457035 | 2.286719  | -0.820046 |
| H | -3.474865 | 0.566892  | -1.150865 |
| C | -0.613904 | -2.440239 | 0.669658  |
| H | 0.370851  | -2.451061 | 0.210698  |
| H | -0.503058 | -2.254128 | 1.737905  |
| H | -1.044661 | -3.433327 | 0.549388  |
| C | 3.596844  | -0.217560 | -1.228171 |
| N | 4.345302  | -0.375839 | -2.089272 |
| H | -1.466389 | 0.160319  | 1.304453  |

40

8H+ SCF Done: -695.065731934 A.U.

|   |           |           |           |
|---|-----------|-----------|-----------|
| N | -0.620871 | 0.039148  | 0.145403  |
| C | -1.313036 | 1.348088  | -0.501719 |
| C | -0.472289 | 2.529262  | -0.007584 |
| H | -0.939702 | 3.444343  | -0.368639 |
| H | -0.440944 | 2.582845  | 1.081253  |
| H | 0.544702  | 2.506216  | -0.393686 |
| C | -1.359805 | -1.403159 | 0.240336  |
| C | -2.383394 | -1.319303 | 1.377423  |
| H | -2.706864 | -2.334281 | 1.604022  |

|   |           |           |           |
|---|-----------|-----------|-----------|
| H | -1.948531 | -0.908160 | 2.290658  |
| H | -3.267615 | -0.748938 | 1.120140  |
| C | -2.019489 | -1.792060 | -1.072678 |
| H | -2.458138 | -2.780432 | -0.931759 |
| H | -2.824194 | -1.118715 | -1.354051 |
| H | -1.309269 | -1.870858 | -1.892720 |
| C | 0.798637  | -0.066236 | -0.233781 |
| C | 1.782759  | 0.209078  | 0.729795  |
| C | 1.179883  | -0.455892 | -1.505712 |
| C | 3.136349  | 0.112928  | 0.395911  |
| C | 2.528888  | -0.551893 | -1.828346 |
| H | 0.441569  | -0.701733 | -2.249905 |
| C | 3.506368  | -0.262800 | -0.884819 |
| H | 3.882038  | 0.331166  | 1.146906  |
| H | 2.809906  | -0.859245 | -2.826145 |
| H | 4.553642  | -0.336531 | -1.142117 |
| C | -1.317875 | 1.318093  | -2.025400 |
| H | -1.818586 | 0.447760  | -2.437247 |
| H | -1.871277 | 2.197659  | -2.354394 |
| H | -0.318919 | 1.396955  | -2.445550 |
| C | -2.732007 | 1.482869  | 0.040212  |
| H | -2.760578 | 1.474204  | 1.128838  |
| H | -3.112066 | 2.449763  | -0.287687 |
| H | -3.404097 | 0.723938  | -0.349590 |
| C | -0.293960 | -2.432321 | 0.630609  |
| H | 0.435067  | -2.609112 | -0.155443 |
| H | 0.230422  | -2.157532 | 1.545762  |
| H | -0.809402 | -3.372785 | 0.819928  |
| C | 1.407411  | 0.570904  | 2.057641  |
| N | 1.052108  | 0.849151  | 3.118448  |
| H | -0.616462 | 0.300039  | 1.133153  |

40

9H+ SCF Done: -695.067218852 A.U.

|   |           |           |           |
|---|-----------|-----------|-----------|
| N | -1.104403 | -0.006007 | -0.374394 |
| C | -1.749962 | -1.423990 | 0.042340  |
| C | -1.065530 | -2.453459 | -0.861901 |
| H | -1.512814 | -3.426049 | -0.660564 |
| H | -1.223182 | -2.231688 | -1.918491 |
| H | 0.001934  | -2.534044 | -0.669572 |
| C | -1.780003 | 1.416609  | 0.004310  |
| C | -2.968404 | 1.633368  | -0.937548 |
| H | -3.289935 | 2.668094  | -0.826704 |
| H | -2.688825 | 1.495321  | -1.983800 |
| H | -3.820971 | 1.004666  | -0.711882 |
| C | -2.211897 | 1.469105  | 1.461304  |
| H | -2.624497 | 2.462225  | 1.640213  |
| H | -2.990691 | 0.749089  | 1.695392  |
| H | -1.380128 | 1.338753  | 2.149699  |
| C | 0.362555  | -0.006899 | -0.211830 |
| C | 1.143051  | -0.061281 | -1.359661 |
| C | 0.953423  | 0.070845  | 1.043088  |
| C | 2.524249  | -0.057271 | -1.259546 |

|   |           |           |           |
|---|-----------|-----------|-----------|
| H | 0.685246  | -0.104774 | -2.339629 |
| C | 2.334053  | 0.076631  | 1.149743  |
| H | 0.360639  | 0.142567  | 1.939184  |
| C | 3.124936  | 0.007637  | -0.000427 |
| H | 3.131732  | -0.101898 | -2.151941 |
| H | 2.796794  | 0.138621  | 2.124255  |
| C | -1.500133 | -1.774397 | 1.504727  |
| H | -1.876575 | -1.029008 | 2.197929  |
| H | -2.036785 | -2.702227 | 1.702384  |
| H | -0.450170 | -1.964567 | 1.710598  |
| C | -3.243809 | -1.411602 | -0.266888 |
| H | -3.446104 | -1.136931 | -1.301253 |
| H | -3.611909 | -2.426702 | -0.122520 |
| H | -3.809349 | -0.766475 | 0.399037  |
| C | -0.742636 | 2.506516  | -0.286355 |
| H | 0.105382  | 2.479331  | 0.392260  |
| H | -0.375723 | 2.461146  | -1.311901 |
| H | -1.239455 | 3.466963  | -0.155400 |
| C | 4.550522  | 0.009603  | 0.111295  |
| N | 5.698858  | 0.010495  | 0.201648  |
| H | -1.248289 | -0.022318 | -1.383965 |

55

10H+ SCF Done: -1061.16454338 A.U.

|   |           |           |           |
|---|-----------|-----------|-----------|
| N | -0.222593 | 0.023084  | -0.171138 |
| C | -1.726545 | 0.207970  | 0.171976  |
| C | -2.015145 | 1.212592  | 1.286664  |
| C | -2.481059 | 0.555263  | -1.111179 |
| H | -2.056889 | -0.775533 | 0.502844  |
| C | -3.526038 | 1.235104  | 1.560669  |
| H | -1.703408 | 2.215283  | 0.989733  |
| H | -1.477778 | 0.963282  | 2.198564  |
| C | -3.988933 | 0.614277  | -0.839104 |
| H | -2.141766 | 1.522897  | -1.491877 |
| H | -2.270243 | -0.192819 | -1.878603 |
| C | -4.318666 | 1.580388  | 0.299513  |
| H | -3.728073 | 1.958464  | 2.352074  |
| H | -3.840707 | 0.257296  | 1.939361  |
| H | -4.505035 | 0.905553  | -1.755265 |
| H | -4.344459 | -0.388649 | -0.581896 |
| H | -5.389505 | 1.558433  | 0.510413  |
| H | -4.077281 | 2.603022  | -0.009607 |
| C | 0.526204  | 1.384175  | -0.294293 |
| C | 1.309495  | 1.820382  | 0.937638  |
| C | 1.370395  | 1.445732  | -1.568534 |
| H | -0.293675 | 2.084003  | -0.432844 |
| C | 1.833752  | 3.248070  | 0.718882  |
| H | 2.153138  | 1.150423  | 1.111939  |
| H | 0.680851  | 1.802439  | 1.825454  |
| C | 1.867644  | 2.881484  | -1.774871 |
| H | 2.226367  | 0.778029  | -1.502562 |
| H | 0.776073  | 1.126463  | -2.428444 |
| C | 2.661869  | 3.365755  | -0.560747 |

|   |           |           |           |
|---|-----------|-----------|-----------|
| H | 2.423145  | 3.542352  | 1.588677  |
| H | 0.982622  | 3.935160  | 0.667777  |
| H | 2.480382  | 2.919047  | -2.676997 |
| H | 1.012958  | 3.544907  | -1.944693 |
| H | 2.980599  | 4.399726  | -0.706078 |
| H | 3.571901  | 2.764433  | -0.461201 |
| C | 0.404336  | -1.156434 | 0.590625  |
| C | 0.293835  | -1.072482 | 2.105407  |
| H | -0.745781 | -1.051214 | 2.420668  |
| H | 0.743091  | -1.969787 | 2.519955  |
| H | 0.818515  | -0.214026 | 2.505188  |
| C | 1.856150  | -1.349500 | 0.070374  |
| C | -0.290554 | -2.469149 | 0.108878  |
| O | 2.748761  | -1.334909 | 1.038895  |
| O | 2.083972  | -1.527507 | -1.099695 |
| O | -0.271321 | -3.473160 | 0.765415  |
| O | -0.825549 | -2.341057 | -1.097566 |
| C | 4.128311  | -1.572069 | 0.651585  |
| H | 4.694696  | -1.519107 | 1.574742  |
| H | 4.214663  | -2.555700 | 0.194800  |
| H | 4.450129  | -0.805282 | -0.050163 |
| C | -1.415116 | -3.529343 | -1.687330 |
| H | -1.803650 | -3.207337 | -2.647251 |
| H | -0.647596 | -4.290150 | -1.810336 |
| H | -2.212106 | -3.899258 | -1.046131 |
| H | -0.239546 | -0.324162 | -1.133579 |

52

11H+ SCF Done: -910.412126116 A.U.

|   |           |           |           |
|---|-----------|-----------|-----------|
| N | 0.113821  | 0.976338  | -0.288060 |
| C | 0.164799  | 2.525374  | -0.223672 |
| C | -0.858858 | 3.103290  | -1.187948 |
| H | -1.878326 | 2.929333  | -0.846143 |
| H | -0.697665 | 4.179216  | -1.249830 |
| H | -0.750355 | 2.691806  | -2.192551 |
| H | 1.160354  | 2.758580  | -0.592738 |
| C | 0.005857  | 3.057978  | 1.188261  |
| H | 0.713966  | 2.619033  | 1.889375  |
| H | 0.195363  | 4.130865  | 1.159882  |
| H | -1.006239 | 2.911433  | 1.561779  |
| C | -1.233446 | 0.414548  | -0.057929 |
| C | -1.967220 | -0.019288 | -1.148108 |
| C | -1.758567 | 0.315808  | 1.227143  |
| C | -3.240879 | -0.547611 | -0.974030 |
| H | -1.562531 | 0.047861  | -2.150308 |
| C | -3.023666 | -0.207098 | 1.407364  |
| H | -1.193368 | 0.631094  | 2.090968  |
| C | -3.779323 | -0.640824 | 0.310927  |
| H | -3.793062 | -0.879965 | -1.839452 |
| H | -3.447546 | -0.291675 | 2.398430  |
| O | -5.002337 | -1.133191 | 0.597051  |
| C | -5.830686 | -1.593584 | -0.472897 |
| H | -6.750941 | -1.935079 | -0.007523 |

|   |           |           |           |
|---|-----------|-----------|-----------|
| H | -6.053030 | -0.784564 | -1.172635 |
| H | -5.359888 | -2.423857 | -1.004408 |
| C | 1.203639  | 0.245839  | 0.523802  |
| H | 0.920038  | 0.386961  | 1.563536  |
| C | 2.610506  | 0.820767  | 0.288733  |
| C | 1.193155  | -1.255809 | 0.179900  |
| H | 2.633808  | 1.884440  | 0.523166  |
| C | 3.072164  | 0.578884  | -1.159415 |
| C | 3.567184  | 0.096651  | 1.258062  |
| H | 0.190008  | -1.657856 | 0.321096  |
| C | 1.659383  | -1.487894 | -1.268560 |
| C | 2.161444  | -1.962813 | 1.146284  |
| H | 4.073610  | 0.995929  | -1.284897 |
| H | 2.436611  | 1.106030  | -1.879794 |
| C | 3.078599  | -0.929630 | -1.458324 |
| H | 3.260594  | 0.278322  | 2.291968  |
| H | 4.567698  | 0.519042  | 1.140896  |
| C | 3.580999  | -1.408727 | 0.960143  |
| H | 0.972430  | -1.034521 | -1.992112 |
| H | 1.639039  | -2.559630 | -1.477188 |
| H | 1.830008  | -1.822766 | 2.178969  |
| H | 2.139954  | -3.036107 | 0.944288  |
| H | 3.402116  | -1.095347 | -2.488023 |
| C | 4.039418  | -1.640179 | -0.489427 |
| H | 4.263548  | -1.910986 | 1.649131  |
| H | 4.063405  | -2.711227 | -0.707891 |
| H | 5.055291  | -1.259509 | -0.626095 |
| H | 0.330040  | 0.770207  | -1.263735 |

36

12H+ SCF Done: -488.390275302 A.U.

|   |           |           |           |
|---|-----------|-----------|-----------|
| N | 0.003217  | -0.131738 | -0.262099 |
| C | -1.495921 | 0.382975  | -0.009465 |
| C | -2.453836 | -0.814570 | -0.076067 |
| H | -2.300255 | -1.529360 | 0.726291  |
| H | -3.462137 | -0.416535 | 0.029918  |
| H | -2.405708 | -1.330041 | -1.033235 |
| C | -1.624489 | 1.029038  | 1.365568  |
| H | -1.050816 | 1.944286  | 1.468050  |
| H | -2.673811 | 1.286738  | 1.509152  |
| H | -1.345720 | 0.342697  | 2.164392  |
| C | 1.247294  | 0.855172  | -0.016859 |
| C | 0.934497  | 2.285324  | -0.456563 |
| H | 0.163810  | 2.764836  | 0.136651  |
| H | 1.846987  | 2.864057  | -0.318837 |
| H | 0.671639  | 2.341676  | -1.511294 |
| C | 2.403187  | 0.352664  | -0.895347 |
| H | 2.087565  | 0.162672  | -1.923039 |
| H | 3.158853  | 1.136033  | -0.930689 |
| H | 2.878292  | -0.535984 | -0.495502 |
| C | 1.669143  | 0.825742  | 1.450787  |
| H | 2.521376  | 1.497170  | 1.555546  |
| H | 0.892792  | 1.174542  | 2.125202  |

|   |           |           |           |
|---|-----------|-----------|-----------|
| H | 1.997750  | -0.162627 | 1.763978  |
| C | -1.893120 | 1.337585  | -1.142948 |
| H | -1.461169 | 2.326205  | -1.060117 |
| H | -1.644533 | 0.924266  | -2.122846 |
| H | -2.975212 | 1.455220  | -1.111329 |
| C | 0.235031  | -1.452438 | 0.393892  |
| C | -0.192935 | -2.744492 | -0.232079 |
| C | 1.264441  | -2.439110 | -0.079886 |
| H | 0.099460  | -1.367337 | 1.460177  |
| H | -0.582999 | -2.725790 | -1.240320 |
| H | -0.671740 | -3.464472 | 0.416638  |
| H | 1.847791  | -2.933977 | 0.684164  |
| H | 1.800248  | -2.243880 | -0.995403 |
| H | 0.025269  | -0.295565 | -1.269051 |

35

13H+ SCF Done: -450.308474701 A.U.

|   |           |           |           |
|---|-----------|-----------|-----------|
| N | 0.133689  | -0.007958 | -0.431037 |
| C | -1.285893 | -0.607789 | -0.025287 |
| C | -1.268984 | -2.131392 | -0.196469 |
| H | -0.627680 | -2.636508 | 0.522333  |
| H | -2.285512 | -2.483494 | -0.025195 |
| H | -0.990588 | -2.433309 | -1.206217 |
| C | -1.679190 | -0.256773 | 1.405601  |
| H | -1.918743 | 0.796228  | 1.519111  |
| H | -2.580314 | -0.820666 | 1.644646  |
| H | -0.918893 | -0.529828 | 2.132416  |
| C | 0.512326  | 1.453495  | -0.052203 |
| C | -0.313704 | 2.480664  | -0.817353 |
| H | -1.306196 | 2.615656  | -0.393168 |
| H | 0.204556  | 3.437166  | -0.742688 |
| H | -0.406234 | 2.238999  | -1.876818 |
| C | 0.575779  | 1.797597  | 1.434437  |
| H | 1.256967  | 2.643578  | 1.532346  |
| H | -0.387532 | 2.110689  | 1.826848  |
| H | 0.958271  | 0.997578  | 2.056973  |
| C | -2.311035 | -0.038949 | -1.013962 |
| H | -2.448713 | 1.032030  | -0.913479 |
| H | -2.041813 | -0.266295 | -2.047634 |
| H | -3.272447 | -0.511665 | -0.816292 |
| C | 1.338994  | -0.979185 | -0.304127 |
| C | 1.783334  | -1.269351 | 1.120223  |
| H | 2.455935  | -2.126850 | 1.083466  |
| H | 2.338507  | -0.440163 | 1.553068  |
| H | 0.959708  | -1.529660 | 1.780444  |
| C | 2.502420  | -0.519033 | -1.179521 |
| H | 3.178323  | -1.365773 | -1.300093 |
| H | 2.177466  | -0.215792 | -2.176727 |
| H | 3.075382  | 0.291539  | -0.730913 |
| H | 0.962331  | -1.894510 | -0.743942 |
| H | 1.522209  | 1.514210  | -0.444652 |
| H | 0.034898  | 0.056853  | -1.444605 |

38

14H+ SCF Done: -489.625290012 A.U.

|   |           |           |           |
|---|-----------|-----------|-----------|
| N | 0.011241  | -0.085242 | -0.402916 |
| C | -1.576403 | 0.023263  | -0.110200 |
| C | -2.269997 | -1.301058 | -0.473682 |
| H | -2.000684 | -2.132801 | 0.170638  |
| H | -3.339077 | -1.137362 | -0.345935 |
| H | -2.111586 | -1.579881 | -1.515945 |
| C | -1.885254 | 0.352367  | 1.349184  |
| H | -1.456867 | 1.289052  | 1.685545  |
| H | -2.968065 | 0.445339  | 1.435352  |
| H | -1.573754 | -0.434063 | 2.030560  |
| C | 0.985569  | 1.080290  | 0.101592  |
| C | 0.315893  | 2.458929  | 0.022253  |
| H | -0.536790 | 2.582786  | 0.678208  |
| H | 1.063964  | 3.184474  | 0.338131  |
| H | 0.032487  | 2.713157  | -0.996975 |
| C | 2.179249  | 1.157992  | -0.867077 |
| H | 1.855805  | 1.179533  | -1.909354 |
| H | 2.698955  | 2.095174  | -0.673671 |
| H | 2.900317  | 0.362579  | -0.736426 |
| C | 1.473228  | 0.812482  | 1.522316  |
| H | 2.166772  | -0.022089 | 1.562783  |
| H | 2.014503  | 1.695711  | 1.860298  |
| H | 0.662215  | 0.632534  | 2.222687  |
| C | -2.164367 | 1.081014  | -1.060133 |
| H | -1.967854 | 2.101521  | -0.760887 |
| H | -1.815853 | 0.939010  | -2.085430 |
| H | -3.245733 | 0.953741  | -1.070785 |
| C | 0.524390  | -1.558584 | -0.275132 |
| C | 0.507995  | -2.153764 | 1.128375  |
| H | 0.549481  | -3.237444 | 1.010631  |
| H | 1.368273  | -1.858915 | 1.720777  |
| H | -0.391232 | -1.926712 | 1.689790  |
| C | 1.853266  | -1.844289 | -0.967833 |
| H | 1.900137  | -2.925660 | -1.103577 |
| H | 1.924738  | -1.390072 | -1.954928 |
| H | 2.716061  | -1.557790 | -0.372061 |
| H | 0.028257  | 0.056999  | -1.412351 |
| H | -0.214582 | -2.083987 | -0.864645 |

41

15H+ SCF Done: -528.935847633 A.U.

|   |           |           |           |
|---|-----------|-----------|-----------|
| N | -0.000729 | -0.000557 | -0.335384 |
| C | 1.080843  | -1.172973 | -0.017170 |
| C | 2.535765  | -0.720043 | -0.228197 |
| H | 2.867067  | 0.066893  | 0.436100  |
| H | 3.151115  | -1.590571 | -0.006187 |
| H | 2.736029  | -0.442679 | -1.260025 |
| C | 0.949224  | -1.681534 | 1.418006  |
| H | -0.012716 | -2.127182 | 1.638980  |
| H | 1.699632  | -2.460068 | 1.555825  |
| H | 1.145779  | -0.904175 | 2.150943  |
| C | -1.557705 | -0.348783 | -0.018286 |

|   |           |           |           |
|---|-----------|-----------|-----------|
| C | -1.893925 | -1.833524 | -0.236747 |
| H | -1.375535 | -2.518494 | 0.420730  |
| H | -2.954769 | -1.932508 | -0.011804 |
| H | -1.757193 | -2.137651 | -1.271408 |
| C | -2.440417 | 0.387022  | -1.050918 |
| H | -2.001910 | 0.360747  | -2.049884 |
| H | -3.389399 | -0.142266 | -1.111022 |
| H | -2.668775 | 1.411532  | -0.796446 |
| C | -1.934924 | 0.014261  | 1.417163  |
| H | -1.834141 | 1.068470  | 1.643704  |
| H | -2.987049 | -0.239213 | 1.547509  |
| H | -1.368214 | -0.553060 | 2.150183  |
| C | 0.891707  | -2.302703 | -1.053176 |
| H | 0.106222  | -3.004595 | -0.815508 |
| H | 0.720772  | -1.905997 | -2.055404 |
| H | 1.819330  | -2.870175 | -1.095390 |
| C | 0.476313  | 1.521295  | -0.018399 |
| C | 0.970733  | 1.664779  | 1.420588  |
| H | 1.270629  | 2.703820  | 1.557366  |
| H | 0.193376  | 1.450303  | 2.148237  |
| H | 1.834849  | 1.053871  | 1.650376  |
| C | -0.639795 | 2.555866  | -0.240708 |
| H | -0.193471 | 3.523589  | -0.016962 |
| H | -0.971768 | 2.589573  | -1.275336 |
| H | -1.492298 | 2.451360  | 0.417442  |
| H | -0.003621 | -0.002035 | -1.353558 |
| C | 1.562297  | 1.916647  | -1.044813 |
| H | 2.564608  | 1.623250  | -0.768840 |
| H | 1.343355  | 1.527498  | -2.040758 |
| H | 1.562493  | 3.001801  | -1.125232 |

36

16H+ SCF Done: -488.446618442 A.U.

|   |           |           |           |
|---|-----------|-----------|-----------|
| C | -1.440984 | 0.031609  | -0.024783 |
| C | -1.616810 | -1.497098 | -0.144128 |
| C | -0.374053 | -2.112071 | 0.468842  |
| C | 0.779068  | -1.195782 | 0.049547  |
| H | -1.710724 | -1.784767 | -1.190272 |
| H | -2.529355 | -1.811637 | 0.358402  |
| H | -0.443464 | -2.135774 | 1.559010  |
| H | -0.192543 | -3.131519 | 0.133493  |
| N | 0.118170  | 0.204274  | 0.276580  |
| C | -2.205429 | 0.562054  | 1.187348  |
| H | -2.028654 | 1.618693  | 1.371066  |
| H | -3.271787 | 0.427569  | 1.008738  |
| H | -1.949667 | 0.004218  | 2.090562  |
| C | -1.872917 | 0.713463  | -1.317662 |
| H | -2.905403 | 0.414826  | -1.501529 |
| H | -1.852421 | 1.798593  | -1.272356 |
| H | -1.284266 | 0.383822  | -2.172432 |
| C | 1.976990  | -1.419445 | 0.971119  |
| H | 2.160173  | -2.493550 | 1.013524  |
| H | 2.889081  | -0.945240 | 0.625543  |



|   |           |           |           |
|---|-----------|-----------|-----------|
| H | 1.769241  | -1.084893 | 1.989207  |
| C | 1.144758  | -1.387887 | -1.419636 |
| H | 1.922812  | -0.703652 | -1.747698 |
| H | 1.526839  | -2.401376 | -1.540261 |
| H | 0.289266  | -1.275513 | -2.081878 |
| C | 0.785499  | 1.457096  | -0.306900 |
| H | 0.586036  | 1.420615  | -1.374349 |
| C | 0.175146  | 2.716921  | 0.308541  |
| H | 0.680672  | 3.581174  | -0.119826 |
| H | -0.884930 | 2.836016  | 0.115887  |
| H | 0.338913  | 2.739524  | 1.388197  |
| C | 2.293787  | 1.493522  | -0.074333 |
| H | 2.834313  | 0.715715  | -0.601869 |
| H | 2.657026  | 2.449348  | -0.450131 |
| H | 2.538000  | 1.441748  | 0.987044  |
| H | 0.163318  | 0.331855  | 1.288150  |

39

17H+ SCF Done: -527.767047655 A.U.

|   |           |           |           |
|---|-----------|-----------|-----------|
| C | -0.871962 | -1.254659 | -0.012112 |
| C | -2.208315 | -0.610338 | 0.389119  |
| C | -2.201675 | 0.768174  | -0.229480 |
| C | -0.785345 | 1.308530  | -0.003882 |
| H | -2.283944 | -0.543871 | 1.474303  |
| H | -3.037240 | -1.225966 | 0.044056  |
| H | -2.409449 | 0.716996  | -1.300510 |
| H | -2.935768 | 1.440268  | 0.210779  |
| N | 0.068230  | 0.015283  | -0.322326 |
| C | -1.018522 | -2.019339 | -1.329858 |
| H | -0.071313 | -2.413382 | -1.690437 |
| H | -1.689257 | -2.862650 | -1.170224 |
| H | -1.456240 | -1.393677 | -2.110186 |
| C | -0.398773 | -2.173483 | 1.103637  |
| H | -1.196525 | -2.902583 | 1.254413  |
| H | 0.503827  | -2.728744 | 0.865512  |
| H | -0.265403 | -1.643429 | 2.043221  |
| C | -0.522794 | 2.437683  | -1.002032 |
| H | -1.380924 | 3.109410  | -0.958445 |
| H | 0.361612  | 3.024414  | -0.779254 |
| H | -0.454732 | 2.066798  | -2.026178 |
| C | -0.594914 | 1.786748  | 1.430112  |
| H | 0.394540  | 2.204667  | 1.595881  |
| H | -1.317775 | 2.582255  | 1.611634  |
| H | -0.772761 | 1.001749  | 2.162514  |
| C | 1.619239  | -0.047626 | -0.030160 |
| C | 2.189755  | -1.199297 | -0.866596 |
| H | 3.268549  | -1.219101 | -0.716254 |
| H | 1.805938  | -2.171480 | -0.574411 |
| H | 2.010135  | -1.052460 | -1.932926 |
| C | 2.259235  | 1.249532  | -0.537105 |
| H | 2.024334  | 2.103382  | 0.091465  |
| H | 3.339585  | 1.114522  | -0.507323 |
| H | 1.986465  | 1.471993  | -1.568080 |

|   |          |           |           |
|---|----------|-----------|-----------|
| C | 1.982851 | -0.240250 | 1.445068  |
| H | 3.043861 | -0.010029 | 1.542004  |
| H | 1.446781 | 0.426843  | 2.110427  |
| H | 1.846878 | -1.259752 | 1.785433  |
| H | 0.068542 | 0.022795  | -1.341400 |

39

18H+ SCF Done: -370.458599103 A.U.

|   |           |           |           |
|---|-----------|-----------|-----------|
| C | 2.629053  | -0.000501 | 0.185998  |
| C | 1.944740  | -1.211570 | -0.400676 |
| C | 0.454740  | -1.369710 | -0.043652 |
| C | 0.455245  | 1.369581  | -0.043594 |
| C | 1.945217  | 1.210911  | -0.400516 |
| H | 2.046135  | -1.177340 | -1.489267 |
| H | 2.424051  | -2.136138 | -0.077287 |
| H | 2.594612  | -0.000570 | 1.276777  |
| H | 3.684076  | -0.000686 | -0.091526 |
| H | 2.046687  | 1.176802  | -1.489102 |
| H | 2.424850  | 2.135256  | -0.076961 |
| N | -0.346084 | 0.000067  | -0.308151 |
| C | -1.784169 | 0.000303  | 0.310558  |
| H | -1.610531 | 0.000353  | 1.382186  |
| C | -2.616073 | -1.227895 | -0.064883 |
| H | -2.269742 | -2.150249 | 0.382243  |
| H | -3.622821 | -1.059238 | 0.312764  |
| H | -2.688468 | -1.353229 | -1.145480 |
| C | -2.615667 | 1.228700  | -0.065135 |
| H | -3.622599 | 1.060300  | 0.312128  |
| H | -2.269251 | 2.150950  | 0.382139  |
| H | -2.687634 | 1.354073  | -1.145759 |
| C | 0.317075  | 1.791533  | 1.417575  |
| H | -0.707829 | 1.989241  | 1.716001  |
| H | 0.739961  | 1.061264  | 2.102993  |
| H | 0.872214  | 2.720612  | 1.544551  |
| C | -0.058997 | 2.455033  | -1.007805 |
| H | 0.714680  | 3.218730  | -1.078497 |
| H | -0.206701 | 2.059700  | -2.014259 |
| H | -0.965198 | 2.951978  | -0.691641 |
| C | 0.316570  | -1.791607 | 1.417539  |
| H | -0.708388 | -1.988708 | 1.716168  |
| H | 0.871188  | -2.721014 | 1.544402  |
| H | 0.740017  | -1.061598 | 2.102886  |
| C | -0.060012 | -2.454951 | -1.007832 |
| H | -0.207605 | -2.059552 | -2.014276 |
| H | 0.713333  | -3.218979 | -1.078569 |
| H | -0.966412 | -2.951506 | -0.691620 |
| H | -0.482368 | 0.000124  | -1.319399 |

27

19H+ SCF Done: -370.458599103 A.U.

|   |          |           |           |
|---|----------|-----------|-----------|
| C | 2.665505 | 0.016230  | 0.164671  |
| C | 1.905920 | -1.248692 | -0.222105 |
| C | 0.480717 | -1.237688 | 0.308488  |
| C | 0.462779 | 1.246447  | 0.233329  |

|   |           |           |           |
|---|-----------|-----------|-----------|
| C | 1.886031  | 1.240748  | -0.303812 |
| H | -0.061995 | -2.112295 | -0.031789 |
| H | 1.887161  | -1.356420 | -1.310447 |
| H | 2.392440  | -2.141810 | 0.172682  |
| H | 2.791714  | 0.053511  | 1.250853  |
| H | 3.662749  | 0.009502  | -0.275833 |
| H | -0.091664 | 2.089930  | -0.162194 |
| H | 0.441807  | 1.288966  | 1.322358  |
| H | 1.859672  | 1.273332  | -1.397721 |
| H | 2.361804  | 2.165452  | 0.025896  |
| H | 0.458844  | -1.211100 | 1.398048  |
| N | -0.285934 | -0.013008 | -0.152370 |
| C | -1.745492 | -0.022017 | 0.331934  |
| H | -1.669423 | -0.079640 | 1.418026  |
| C | -2.474245 | -1.247388 | -0.210615 |
| H | -2.091274 | -2.184822 | 0.184842  |
| H | -3.521520 | -1.178933 | 0.079361  |
| H | -2.434864 | -1.279211 | -1.301728 |
| C | -2.460165 | 1.262677  | -0.071468 |
| H | -3.511373 | 1.164711  | 0.195411  |
| H | -2.077673 | 2.141768  | 0.441541  |
| H | -2.403677 | 1.424837  | -1.150061 |
| H | -0.317480 | -0.038625 | -1.175189 |

30

20H+ SCF Done: -409.790459108 A.U.

|   |           |           |           |
|---|-----------|-----------|-----------|
| C | 2.858936  | -0.002244 | 0.193298  |
| C | 2.102172  | -1.250355 | -0.253495 |
| C | 0.658956  | -1.232386 | 0.229338  |
| C | 0.659603  | 1.241106  | 0.222359  |
| C | 2.106783  | 1.249179  | -0.251122 |
| H | 0.118553  | -2.102348 | -0.126113 |
| H | 2.120609  | -1.336398 | -1.344188 |
| H | 2.567189  | -2.155652 | 0.139330  |
| H | 2.954103  | -0.003944 | 1.283231  |
| H | 3.868780  | -0.002987 | -0.217725 |
| H | 0.129296  | 2.108610  | -0.152624 |
| H | 0.598286  | 1.231332  | 1.308586  |
| H | 2.129862  | 1.336824  | -1.341660 |
| H | 2.574140  | 2.152246  | 0.144102  |
| H | 0.611357  | -1.207133 | 1.315678  |
| N | -0.066400 | 0.003306  | -0.265350 |
| C | -1.611693 | -0.001800 | -0.009368 |
| C | -2.199622 | -1.200680 | -0.759152 |
| H | -1.906423 | -2.154677 | -0.326547 |
| H | -3.285394 | -1.141004 | -0.701551 |
| H | -1.925535 | -1.189172 | -1.816190 |
| C | -2.192725 | 1.289748  | -0.591267 |
| H | -3.278412 | 1.207165  | -0.580916 |
| H | -1.931225 | 2.169244  | -0.006603 |
| H | -1.883196 | 1.443617  | -1.626903 |
| C | -1.891167 | -0.096834 | 1.487031  |
| H | -1.452581 | 0.731966  | 2.041214  |

H -2.970287 -0.050396 1.630659  
H -1.545028 -1.036502 1.914623  
H 0.023247 0.001652 -1.284679

32

21H+ SCF Done: -410.993317114 A.U.

N -0.000885 -0.000652 -0.387304  
C 1.346408 -0.675563 -0.056577  
C 2.338958 -0.329659 -1.160876  
H 2.563551 0.737460 -1.187197  
H 3.272217 -0.859561 -0.974931  
H 1.973109 -0.636789 -2.142407  
C 1.890478 -0.343325 1.324078  
H 1.201182 -0.594093 2.124990  
H 2.792671 -0.937307 1.469925  
H 2.173607 0.705068 1.411199  
C -1.258269 -0.827943 -0.048590  
C -1.463034 -1.862155 -1.149780  
H -0.657013 -2.596833 -1.173396  
H -2.393110 -2.397206 -0.962480  
H -1.542359 -1.393298 -2.132509  
C -1.234887 -1.461702 1.333473  
H -2.196671 -1.951955 1.483666  
H -0.463229 -2.225670 1.420735  
H -1.109859 -0.736374 2.132061  
C -0.088207 1.503146 -0.054758  
C -0.635788 1.806278 1.331180  
H -0.576631 2.884875 1.476031  
H -1.682904 1.522411 1.428466  
H -0.064507 1.337544 2.126850  
C -0.894577 2.191040 -1.150654  
H -0.888922 3.265178 -0.970004  
H -0.462574 2.019212 -2.138336  
H -1.934604 1.862081 -1.158772  
H 0.941438 1.849875 -0.115729  
H -2.072539 -0.107834 -0.097360  
H 1.130344 -1.740831 -0.107881  
H -0.003498 -0.002092 -1.406775

26

22H+ SCF Done: -332.343185782 A.U.

N 0.202640 -0.607722 -0.318061  
C -1.201458 -0.030658 0.008769  
C -2.177733 -1.149570 -0.361720  
H -2.023732 -2.036242 0.256754  
H -3.196336 -0.801654 -0.197635  
H -2.084203 -1.429863 -1.412777  
C -1.278750 0.288331 1.496175  
H -0.623663 1.111333 1.777707  
H -2.300934 0.585881 1.727384  
H -1.039030 -0.583097 2.106785  
C 1.485182 -0.067151 0.310054  
C 1.751244 1.375825 -0.083822  
H 2.743427 1.649385 0.273038

|   |           |           |           |
|---|-----------|-----------|-----------|
| H | 1.738584  | 1.502950  | -1.167880 |
| H | 1.041081  | 2.068328  | 0.360466  |
| C | 2.615117  | -1.000546 | -0.109994 |
| H | 3.534747  | -0.686042 | 0.381482  |
| H | 2.419693  | -2.034624 | 0.179341  |
| H | 2.779666  | -0.960225 | -1.188701 |
| H | 1.329589  | -0.145191 | 1.384119  |
| C | -1.457350 | 1.197664  | -0.860857 |
| H | -0.803873 | 2.029867  | -0.616230 |
| H | -1.347803 | 0.963058  | -1.921089 |
| H | -2.484452 | 1.522570  | -0.698648 |
| H | 0.165754  | -1.598797 | -0.075154 |
| H | 0.315499  | -0.586955 | -1.334170 |

23

23H+ SCF Done: -293.013703224 A.U.

|   |           |           |           |
|---|-----------|-----------|-----------|
| N | 0.000030  | -0.631862 | -0.000219 |
| C | 1.290461  | 0.143034  | -0.248923 |
| C | 2.402740  | -0.868252 | -0.488415 |
| H | 2.164364  | -1.545405 | -1.310162 |
| H | 3.315025  | -0.334368 | -0.750792 |
| H | 2.603466  | -1.457533 | 0.409019  |
| C | -1.290449 | 0.142947  | 0.248853  |
| C | -2.402502 | -0.868559 | 0.488454  |
| H | -3.315088 | -0.334864 | 0.750148  |
| H | -2.602688 | -1.458458 | -0.408698 |
| H | -2.164164 | -1.545150 | 1.310666  |
| C | -1.580248 | 1.080455  | -0.910774 |
| H | -2.535073 | 1.571528  | -0.727042 |
| H | -0.825007 | 1.857417  | -1.017577 |
| H | -1.660839 | 0.532648  | -1.852014 |
| H | -1.110893 | 0.710567  | 1.160096  |
| C | 1.579955  | 1.080283  | 0.910993  |
| H | 0.824873  | 1.857422  | 1.017608  |
| H | 1.660017  | 0.532214  | 1.852132  |
| H | 2.535014  | 1.571099  | 0.727808  |
| H | -0.152910 | -1.251997 | -0.799403 |
| H | 1.111020  | 0.710814  | -1.160087 |
| H | 0.152933  | -1.252351 | 0.798698  |

26

24H+ SCF Done: -791.909762736 A.U.

|   |           |           |           |
|---|-----------|-----------|-----------|
| N | -0.118179 | -0.099830 | -0.412841 |
| C | -1.311939 | 0.796626  | 0.019781  |
| C | -2.334710 | 0.779123  | -1.104312 |
| H | -2.748118 | -0.220670 | -1.242687 |
| H | -3.152619 | 1.447725  | -0.838684 |
| H | -1.911683 | 1.129323  | -2.047296 |
| C | -1.909921 | 0.408215  | 1.360633  |
| H | -1.166070 | 0.276492  | 2.140526  |
| H | -2.572040 | 1.219852  | 1.662313  |
| H | -2.505304 | -0.499446 | 1.282421  |
| C | 1.341032  | 0.319066  | 0.020360  |
| C | 1.574410  | 1.702898  | -0.594595 |

|    |           |           |           |
|----|-----------|-----------|-----------|
| H  | 0.976382  | 2.483086  | -0.129553 |
| H  | 2.620900  | 1.956320  | -0.432158 |
| H  | 1.399047  | 1.709155  | -1.671735 |
| C  | 1.450175  | 0.341016  | 1.535061  |
| H  | 2.491876  | 0.533106  | 1.790100  |
| H  | 0.850808  | 1.133581  | 1.978070  |
| H  | 1.171247  | -0.616756 | 1.973156  |
| H  | -0.856341 | 1.780410  | 0.090367  |
| Cl | -0.473045 | -1.807179 | -0.104433 |
| C  | 2.303908  | -0.690512 | -0.602252 |
| H  | 2.229799  | -1.670735 | -0.137807 |
| H  | 2.146190  | -0.792249 | -1.677422 |
| H  | 3.317483  | -0.323280 | -0.447843 |
| H  | -0.100279 | -0.063651 | -1.434589 |

23

25H+ SCF Done: -752.578390376 A.U.

|    |           |           |           |
|----|-----------|-----------|-----------|
| N  | -0.008722 | 0.203054  | -0.427222 |
| C  | 1.316377  | -0.609843 | -0.388578 |
| C  | 2.341351  | 0.143529  | -1.218560 |
| H  | 2.565765  | 1.113928  | -0.774096 |
| H  | 3.263523  | -0.435834 | -1.243048 |
| H  | 2.008680  | 0.285266  | -2.248241 |
| C  | 1.804240  | -0.907373 | 1.017395  |
| H  | 1.034189  | -1.324689 | 1.659864  |
| H  | 2.604099  | -1.642478 | 0.929299  |
| H  | 2.215724  | -0.017316 | 1.490418  |
| C  | -1.312331 | -0.617455 | -0.509411 |
| C  | -1.547908 | -1.447519 | 0.735927  |
| H  | -2.503811 | -1.956695 | 0.620457  |
| H  | -0.784804 | -2.208420 | 0.880242  |
| H  | -1.608724 | -0.819933 | 1.625012  |
| H  | 1.028802  | -1.534248 | -0.889663 |
| Cl | -0.067930 | 1.465057  | 0.810175  |
| C  | -2.470249 | 0.302217  | -0.858035 |
| H  | -2.739126 | 0.945692  | -0.021423 |
| H  | -2.252743 | 0.920531  | -1.730751 |
| H  | -3.332162 | -0.319037 | -1.099044 |
| H  | -1.097038 | -1.264742 | -1.363162 |
| H  | 0.024627  | 0.749299  | -1.290705 |

17

26H+ SCF Done: -1133.48206186 A.U.

|    |           |           |           |
|----|-----------|-----------|-----------|
| N  | 0.427251  | -0.000071 | -0.446988 |
| C  | -1.104148 | 0.000023  | 0.042370  |
| C  | -1.715406 | -1.259547 | -0.560969 |
| H  | -1.304709 | -2.168409 | -0.128301 |
| H  | -2.781335 | -1.234637 | -0.336460 |
| H  | -1.607604 | -1.289643 | -1.646046 |
| C  | -1.116082 | 0.000009  | 1.556911  |
| H  | -2.158670 | -0.000165 | 1.873485  |
| H  | -0.640932 | -0.889555 | 1.966828  |
| H  | -0.641205 | 0.889745  | 1.966742  |
| Cl | 1.332730  | 1.439941  | 0.004461  |

|    |           |           |           |
|----|-----------|-----------|-----------|
| C  | -1.715451 | 1.259645  | -0.560930 |
| H  | -1.304835 | 2.168487  | -0.128136 |
| H  | -1.607655 | 1.289873  | -1.645989 |
| H  | -2.781367 | 1.234599  | -0.336349 |
| Cl | 1.332593  | -1.439978 | 0.004478  |
| H  | 0.433589  | 0.000035  | -1.473117 |

29

27H+ SCF Done: -831.231952600 A.U.

|    |           |           |           |
|----|-----------|-----------|-----------|
| N  | -0.010999 | 0.243208  | -0.397557 |
| C  | 1.418787  | -0.385610 | -0.006243 |
| C  | 2.406102  | 0.235963  | -0.996921 |
| H  | 2.483652  | 1.314880  | -0.887996 |
| H  | 3.389591  | -0.188401 | -0.800189 |
| H  | 2.144772  | -0.005132 | -2.029242 |
| C  | 1.786912  | -0.045432 | 1.432113  |
| H  | 1.092925  | -0.465759 | 2.153205  |
| H  | 2.766012  | -0.485351 | 1.620807  |
| H  | 1.871755  | 1.025144  | 1.598406  |
| C  | -1.432224 | -0.375330 | 0.010316  |
| C  | -1.483444 | -0.610501 | 1.508664  |
| H  | -2.502992 | -0.898529 | 1.764222  |
| H  | -0.825862 | -1.415433 | 1.827176  |
| H  | -1.245918 | 0.296361  | 2.063667  |
| Cl | 0.032315  | 1.985761  | -0.045241 |
| C  | -2.506745 | 0.627496  | -0.424526 |
| H  | -2.541459 | 1.506109  | 0.212763  |
| H  | -2.378284 | 0.941078  | -1.461130 |
| H  | -3.468695 | 0.123720  | -0.346912 |
| C  | 1.382708  | -1.896560 | -0.212990 |
| H  | 0.773856  | -2.407147 | 0.527225  |
| H  | 1.060631  | -2.173372 | -1.214499 |
| H  | 2.406003  | -2.250517 | -0.089999 |
| C  | -1.627589 | -1.660640 | -0.801918 |
| H  | -1.032192 | -2.492935 | -0.450723 |
| H  | -2.674087 | -1.944817 | -0.699962 |
| H  | -1.438779 | -1.503600 | -1.865276 |
| H  | -0.020327 | 0.226986  | -1.420515 |

51

28H+ SCF Done: -485.014378873 A.U.

|   |           |           |           |
|---|-----------|-----------|-----------|
| C | -2.041166 | -1.253259 | -0.014918 |
| C | -3.451178 | -0.630231 | 0.030901  |
| C | -3.308987 | 0.770555  | -0.525122 |
| C | -1.968146 | 1.284570  | 0.005935  |
| H | -3.816108 | -0.601516 | 1.056577  |
| H | -4.118233 | 1.434488  | -0.226334 |
| N | -1.074664 | 0.012165  | -0.201708 |
| C | -1.886700 | -2.132202 | -1.254819 |
| H | -0.875406 | -2.510028 | -1.383497 |
| H | -2.552638 | -2.989001 | -1.157264 |
| H | -2.175306 | -1.591410 | -2.158504 |
| C | -1.782799 | -2.025788 | 1.274612  |
| H | -2.591131 | -2.751964 | 1.368071  |

|   |           |           |           |
|---|-----------|-----------|-----------|
| H | -0.848529 | -2.578767 | 1.285392  |
| H | -1.824835 | -1.383752 | 2.152733  |
| C | -1.516338 | 2.469349  | -0.844129 |
| H | -2.329375 | 3.196183  | -0.837571 |
| H | -0.628645 | 2.969404  | -0.472383 |
| H | -1.352923 | 2.178004  | -1.882323 |
| C | -2.045961 | 1.646282  | 1.486867  |
| H | -1.091472 | 1.982393  | 1.884163  |
| H | -2.754159 | 2.467478  | 1.593335  |
| H | -2.400121 | 0.822011  | 2.101730  |
| C | 0.277676  | -0.077125 | 0.519408  |
| H | 0.013653  | -0.232144 | 1.562165  |
| C | 1.151703  | 1.193923  | 0.419872  |
| C | 1.128626  | -1.271221 | 0.018069  |
| H | 0.592061  | 2.064849  | 0.744735  |
| C | 1.701319  | 1.416674  | -1.000098 |
| C | 2.335009  | 1.014041  | 1.393976  |
| H | 0.550130  | -2.188411 | 0.031290  |
| C | 1.669175  | -1.034359 | -1.402791 |
| C | 2.312697  | -1.443254 | 0.990159  |
| H | 2.295765  | 2.333362  | -1.004577 |
| H | 0.898596  | 1.569928  | -1.723755 |
| C | 2.557004  | 0.216634  | -1.425623 |
| H | 1.964512  | 0.880236  | 2.414193  |
| H | 2.931664  | 1.929293  | 1.387375  |
| C | 3.191110  | -0.186667 | 0.972797  |
| H | 0.858391  | -0.930377 | -2.131537 |
| H | 2.236390  | -1.916138 | -1.709790 |
| H | 1.944375  | -1.638329 | 2.001269  |
| H | 2.891225  | -2.318567 | 0.685514  |
| H | 2.937486  | 0.378344  | -2.436507 |
| C | 3.730812  | 0.040596  | -0.448643 |
| H | 4.022241  | -0.308825 | 1.670903  |
| H | 4.348607  | -0.808065 | -0.755035 |
| H | 4.368468  | 0.928596  | -0.469732 |
| H | -4.149341 | -1.238246 | -0.541264 |
| H | -3.283699 | 0.756155  | -1.617302 |
| H | -0.862136 | 0.018541  | -1.198837 |

37

29H+ SCF Done: -526.535101849 A.U.

|   |           |           |           |
|---|-----------|-----------|-----------|
| C | -0.868431 | -1.277681 | -0.015775 |
| C | -2.233339 | -0.656548 | 0.038555  |
| C | -2.232563 | 0.659041  | 0.038131  |
| C | -0.866824 | 1.278428  | -0.015853 |
| H | -3.104893 | -1.292038 | 0.097323  |
| H | -3.103323 | 1.295655  | 0.096565  |
| N | 0.023303  | -0.000229 | -0.324905 |
| C | -0.794809 | -2.272052 | -1.179479 |
| H | 0.138092  | -2.825562 | -1.209068 |
| H | -1.601981 | -2.993364 | -1.049999 |
| H | -0.949898 | -1.777253 | -2.139867 |
| C | -0.566623 | -1.960251 | 1.315727  |



|   |           |           |           |
|---|-----------|-----------|-----------|
| H | -1.354182 | -2.696516 | 1.480790  |
| H | 0.380382  | -2.494263 | 1.311760  |
| H | -0.592278 | -1.259380 | 2.147088  |
| C | -0.791286 | 2.273123  | -1.179188 |
| H | -1.600035 | 2.993044  | -1.051947 |
| H | 0.140697  | 2.828308  | -1.205963 |
| H | -0.942826 | 1.778424  | -2.140201 |
| C | -0.565453 | 1.960418  | 1.316179  |
| H | 0.385235  | 2.487786  | 1.316107  |
| H | -1.348536 | 2.702406  | 1.476993  |
| H | -0.600059 | 1.260631  | 2.148135  |
| C | 1.573551  | -0.000941 | -0.024632 |
| C | 2.171208  | -1.235169 | -0.707991 |
| H | 3.255629  | -1.162561 | -0.640134 |
| H | 1.879908  | -2.164847 | -0.228520 |
| H | 1.911004  | -1.278810 | -1.765852 |
| C | 2.170834  | 1.239959  | -0.696303 |
| H | 1.881921  | 2.164944  | -0.206438 |
| H | 3.255273  | 1.165246  | -0.631638 |
| H | 1.908220  | 1.295301  | -1.752805 |
| C | 1.943351  | -0.007889 | 1.458758  |
| H | 3.032785  | 0.005285  | 1.505623  |
| H | 1.591050  | 0.865868  | 1.993519  |
| H | 1.613245  | -0.898844 | 1.979186  |
| H | 0.023756  | -0.000487 | -1.345098 |

49

30H+ SCF Done: -758.907034700 A.U.

|   |           |           |           |
|---|-----------|-----------|-----------|
| C | -2.039944 | -1.266210 | -0.021576 |
| C | -3.393028 | -0.658357 | -0.260499 |
| C | -3.392983 | 0.658476  | -0.260185 |
| C | -2.039776 | 1.266170  | -0.021513 |
| H | -4.256009 | -1.297079 | -0.380431 |
| H | -4.255906 | 1.297311  | -0.379908 |
| N | -1.112921 | 0.000043  | -0.201760 |
| C | -1.732012 | -2.316346 | -1.089815 |
| H | -0.782387 | -2.819779 | -0.935960 |
| H | -2.516313 | -3.072359 | -1.051599 |
| H | -1.748441 | -1.879382 | -2.089355 |
| C | -1.978882 | -1.844895 | 1.394001  |
| H | -2.759530 | -2.602182 | 1.469502  |
| H | -1.030924 | -2.326533 | 1.619391  |
| H | -2.184252 | -1.089432 | 2.148972  |
| C | -1.732168 | 2.316316  | -1.090038 |
| H | -2.516562 | 3.072205  | -1.051724 |
| H | -0.782556 | 2.819854  | -0.936437 |
| H | -1.748755 | 1.879062  | -2.089438 |
| C | -1.978316 | 1.845030  | 1.393923  |
| H | -1.030292 | 2.326751  | 1.618958  |
| H | -2.758994 | 2.602258  | 1.469639  |
| H | -2.183306 | 1.089655  | 2.149098  |
| C | 0.229057  | 0.000017  | 0.541284  |
| H | -0.043710 | 0.000181  | 1.593930  |

|   |           |           |           |
|---|-----------|-----------|-----------|
| C | 1.088158  | 1.249048  | 0.235319  |
| C | 1.088184  | -1.249033 | 0.235733  |
| H | 0.520323  | 2.155680  | 0.414364  |
| C | 1.614224  | 1.242372  | -1.210436 |
| C | 2.281926  | 1.244917  | 1.210715  |
| H | 0.520460  | -2.155671 | 0.415091  |
| C | 1.614288  | -1.242881 | -1.210026 |
| C | 2.281948  | -1.244498 | 1.211149  |
| H | 2.192618  | 2.154213  | -1.376031 |
| H | 0.796028  | 1.267341  | -1.935715 |
| C | 2.482977  | -0.000273 | -1.446247 |
| H | 1.922515  | 1.274756  | 2.243097  |
| H | 2.867097  | 2.153141  | 1.048632  |
| C | 3.146859  | 0.000176  | 0.978981  |
| H | 0.796085  | -1.268203 | -1.935291 |
| H | 2.192747  | -2.154753 | -1.375225 |
| H | 1.922540  | -1.273956 | 2.243542  |
| H | 2.867143  | -2.152766 | 1.049405  |
| H | 2.851335  | -0.000418 | -2.474322 |
| C | 3.668555  | -0.000077 | -0.467377 |
| H | 3.986890  | 0.000295  | 1.677007  |
| H | 4.294212  | -0.880127 | -0.639728 |
| H | 4.294166  | 0.879945  | -0.640047 |
| H | -0.890178 | -0.000025 | -1.197459 |

55

31H+ SCF Done: -912.623433853 A.U.

|   |           |           |           |
|---|-----------|-----------|-----------|
| C | 1.228731  | 1.275691  | 0.129152  |
| C | 2.607649  | 0.689785  | -0.045610 |
| C | 2.607599  | -0.689758 | -0.045516 |
| C | 1.228537  | -1.275488 | 0.129105  |
| N | 0.321867  | -0.000056 | -0.103835 |
| C | 0.948381  | 2.325791  | -0.946613 |
| H | -0.017787 | 2.806697  | -0.836813 |
| H | 1.708403  | 3.101802  | -0.868544 |
| H | 1.025221  | 1.895345  | -1.946054 |
| C | 1.081780  | 1.837954  | 1.545001  |
| H | 1.826612  | 2.624963  | 1.658825  |
| H | 0.106246  | 2.277448  | 1.733970  |
| H | 1.287621  | 1.085256  | 2.302649  |
| C | 0.948418  | -2.325688 | -0.946872 |
| H | 1.708534  | -3.101570 | -0.868901 |
| H | -0.017708 | -2.806721 | -0.837106 |
| H | 1.025096  | -1.895053 | -1.946240 |
| C | 1.081498  | -1.838030 | 1.544865  |
| H | 0.105809  | -2.277181 | 1.733826  |
| H | 1.825996  | -2.625380 | 1.658430  |
| H | 1.287671  | -1.085583 | 2.302678  |
| C | -1.064915 | -0.000010 | 0.564383  |
| H | -0.848853 | -0.000089 | 1.630094  |
| C | -1.909727 | -1.248081 | 0.214027  |
| C | -1.909716 | 1.248058  | 0.214236  |
| H | -1.356827 | -2.156323 | 0.426013  |

|   |           |           |           |
|---|-----------|-----------|-----------|
| C | -2.358737 | -1.242622 | -1.257577 |
| C | -3.154647 | -1.242687 | 1.124292  |
| H | -1.356853 | 2.156302  | 0.426403  |
| C | -2.358776 | 1.242845  | -1.257368 |
| C | -3.154624 | 1.242451  | 1.124542  |
| H | -2.928640 | -2.154176 | -1.451803 |
| H | -1.504224 | -1.269360 | -1.939487 |
| C | -3.212774 | 0.000132  | -1.540425 |
| H | -2.850952 | -1.269959 | 2.174664  |
| H | -3.728127 | -2.152474 | 0.932095  |
| C | -4.006903 | -0.000085 | 0.844924  |
| H | -1.504262 | 1.269691  | -1.939249 |
| H | -2.928706 | 2.154413  | -1.451433 |
| H | -2.850927 | 1.269510  | 2.174920  |
| H | -3.728112 | 2.152276  | 0.932546  |
| H | -3.524460 | 0.000206  | -2.587059 |
| C | -4.449778 | 0.000063  | -0.627332 |
| H | -4.883364 | -0.000128 | 1.496605  |
| H | -5.065175 | 0.880143  | -0.833132 |
| H | -5.065198 | -0.879958 | -0.833309 |
| C | 3.798073  | -1.400215 | -0.153012 |
| C | 3.798153  | 1.400145  | -0.153361 |
| C | 4.991335  | -0.697283 | -0.264317 |
| C | 4.991367  | 0.697114  | -0.264533 |
| H | 3.805264  | -2.482243 | -0.147803 |
| H | 5.925260  | -1.236505 | -0.351739 |
| H | 5.925299  | 1.236277  | -0.352256 |
| H | 3.805409  | 2.482178  | -0.148485 |
| H | 0.153115  | 0.000093  | -1.109413 |

67

32H+ SCF Done: -1069.92041166 A.U.

|   |           |           |           |
|---|-----------|-----------|-----------|
| C | 1.100112  | 1.302265  | 0.042276  |
| C | 2.465246  | 0.679718  | -0.145240 |
| C | 2.434377  | -0.697296 | -0.232250 |
| C | 1.060820  | -1.287556 | 0.002591  |
| N | 0.157529  | 0.020764  | -0.185614 |
| C | 0.768619  | 2.302879  | -1.090911 |
| H | -0.274835 | 2.586615  | -1.023404 |
| H | 0.888743  | 1.779092  | -2.043540 |
| C | 1.061648  | 1.890996  | 1.476342  |
| H | 2.011613  | 2.420503  | 1.551094  |
| H | 1.155495  | 1.069235  | 2.186257  |
| C | 0.778482  | -2.356438 | -1.098755 |
| H | 1.760455  | -2.715255 | -1.396477 |
| H | 0.408539  | -1.843603 | -1.989834 |
| C | 0.938441  | -1.793625 | 1.457929  |
| H | -0.041338 | -2.238377 | 1.609853  |
| H | 0.997689  | -0.938374 | 2.129337  |
| C | -1.233867 | 0.054534  | 0.483238  |
| H | -1.013661 | 0.126481  | 1.545291  |
| C | -2.081379 | -1.211311 | 0.231137  |
| C | -2.100076 | 1.266007  | 0.056253  |

|   |           |           |           |
|---|-----------|-----------|-----------|
| H | -1.517033 | -2.096305 | 0.488888  |
| C | -2.575379 | -1.312691 | -1.223218 |
| C | -3.304534 | -1.154085 | 1.169890  |
| H | -1.555830 | 2.189478  | 0.186548  |
| C | -2.586482 | 1.156637  | -1.399237 |
| C | -3.324482 | 1.321711  | 0.992761  |
| H | -3.147553 | -2.236875 | -1.333101 |
| H | -1.744229 | -1.382874 | -1.928549 |
| C | -3.445732 | -0.100865 | -1.571630 |
| H | -2.976485 | -1.107131 | 2.212047  |
| H | -3.872894 | -2.080043 | 1.054577  |
| C | -4.175844 | 0.059241  | 0.826939  |
| H | -1.750744 | 1.134134  | -2.105296 |
| H | -3.160770 | 2.054287  | -1.640238 |
| H | -3.002938 | 1.425721  | 2.032671  |
| H | -3.906119 | 2.213706  | 0.748343  |
| H | -3.784171 | -0.177039 | -2.607165 |
| C | -4.658086 | -0.043934 | -0.628760 |
| H | -5.033876 | 0.100783  | 1.501475  |
| H | -5.285168 | 0.816639  | -0.877389 |
| H | -5.272142 | -0.939415 | -0.758089 |
| C | 3.611160  | -1.415993 | -0.436890 |
| C | 3.683482  | 1.357263  | -0.184829 |
| C | 4.820348  | -0.741503 | -0.518985 |
| C | 4.857506  | 0.643133  | -0.377099 |
| H | 3.598820  | -2.493867 | -0.512771 |
| H | 5.735370  | -1.296860 | -0.676574 |
| H | 5.802922  | 1.167812  | -0.416463 |
| H | 3.731574  | 2.427176  | -0.055131 |
| C | 1.593771  | 3.591690  | -1.144026 |
| H | 2.603505  | 3.421528  | -1.508871 |
| H | 1.111913  | 4.282913  | -1.835853 |
| H | 1.654790  | 4.088043  | -0.175817 |
| C | -0.025219 | 2.858286  | 1.947022  |
| H | -0.239818 | 3.636763  | 1.215130  |
| H | -0.956928 | 2.365108  | 2.209388  |
| H | 0.334100  | 3.356146  | 2.848678  |
| C | 2.005140  | -2.804766 | 1.884327  |
| H | 2.986905  | -2.343040 | 1.969861  |
| H | 1.738734  | -3.207306 | 2.861778  |
| H | 2.086337  | -3.642955 | 1.192491  |
| C | -0.062650 | -3.607367 | -0.825855 |
| H | 0.179547  | -4.067414 | 0.130579  |
| H | -1.133711 | -3.440081 | -0.858879 |
| H | 0.166026  | -4.340904 | -1.600067 |
| H | -0.018077 | 0.038635  | -1.189606 |

41

33H+ SCF Done: -528.954524181 A.U.

|   |           |           |           |
|---|-----------|-----------|-----------|
| N | -0.214404 | -0.119568 | -0.265809 |
| C | -1.150028 | 1.200780  | -0.044603 |
| C | -2.620988 | 0.908506  | -0.375686 |
| H | -3.079265 | 0.187155  | 0.298050  |

|   |           |           |           |
|---|-----------|-----------|-----------|
| H | -3.157490 | 1.848115  | -0.248419 |
| H | -2.772149 | 0.599216  | -1.409306 |
| C | -1.098163 | 1.730242  | 1.384415  |
| H | -0.127822 | 2.126909  | 1.661705  |
| H | -1.806663 | 2.555859  | 1.446098  |
| H | -1.405154 | 0.981143  | 2.110681  |
| C | 1.168224  | -0.237325 | 0.530301  |
| C | 2.055773  | 0.983300  | 0.204960  |
| H | 1.560326  | 1.898940  | 0.515789  |
| H | 2.913903  | 0.887637  | 0.873723  |
| C | 1.898312  | -1.495196 | 0.044726  |
| H | 1.965730  | -1.562238 | -1.037519 |
| H | 2.916107  | -1.441569 | 0.430371  |
| H | 1.454874  | -2.406676 | 0.433328  |
| C | 1.001801  | -0.337590 | 2.053836  |
| H | 0.159964  | -0.946008 | 2.359662  |
| H | 1.901473  | -0.812745 | 2.444085  |
| H | 0.921473  | 0.630691  | 2.534181  |
| C | -0.668002 | 2.255271  | -1.047383 |
| H | 0.334192  | 2.618719  | -0.850528 |
| H | -0.715667 | 1.879425  | -2.071568 |
| H | -1.339486 | 3.110982  | -0.987231 |
| C | -1.047245 | -1.426832 | -0.449178 |
| C | -1.401922 | -2.150474 | 0.837881  |
| H | -2.156195 | -2.898397 | 0.590322  |
| H | -0.556819 | -2.674133 | 1.278572  |
| H | -1.835275 | -1.484628 | 1.582872  |
| C | -0.506585 | -2.361283 | -1.534870 |
| H | -1.351256 | -2.954955 | -1.886640 |
| H | -0.123471 | -1.811119 | -2.396063 |
| H | 0.255790  | -3.051630 | -1.190367 |
| H | -1.966467 | -1.050107 | -0.865119 |
| C | 2.574425  | 1.111388  | -1.228168 |
| H | 3.086354  | 2.066731  | -1.346217 |
| H | 3.286531  | 0.324089  | -1.471022 |
| H | 1.784866  | 1.084224  | -1.982108 |
| H | 0.118816  | 0.046633  | -1.214053 |

44

34H+ SCF Done: -568.281188048 A.U.

|   |           |           |           |
|---|-----------|-----------|-----------|
| N | 0.023451  | 0.166081  | -0.118812 |
| C | 1.102748  | -0.905143 | 0.463318  |
| C | 2.557471  | -0.397402 | 0.289787  |
| H | 2.723200  | 0.499724  | 0.886981  |
| H | 3.161466  | -1.162555 | 0.780171  |
| C | 0.872925  | -1.168075 | 1.946835  |
| H | -0.041430 | -1.720228 | 2.135311  |
| H | 1.695829  | -1.784429 | 2.306758  |
| H | 0.866429  | -0.251881 | 2.533327  |
| C | -1.529764 | 0.020636  | 0.267014  |
| C | -2.058130 | -1.376576 | -0.117659 |
| H | -1.546879 | -2.138482 | 0.463558  |
| H | -3.084865 | -1.387363 | 0.255271  |

|   |           |           |           |
|---|-----------|-----------|-----------|
| C | -2.313474 | 1.058080  | -0.547711 |
| H | -2.082875 | 1.030369  | -1.609665 |
| H | -3.370369 | 0.816166  | -0.440848 |
| H | -2.177835 | 2.069716  | -0.179186 |
| C | -1.821854 | 0.240736  | 1.758961  |
| H | -1.235121 | 1.027402  | 2.213325  |
| H | -2.869222 | 0.530364  | 1.841104  |
| H | -1.695486 | -0.663207 | 2.344773  |
| C | 0.985715  | -2.204174 | -0.343587 |
| H | 0.090325  | -2.772598 | -0.127812 |
| H | 1.041275  | -2.031144 | -1.417454 |
| H | 1.835457  | -2.832359 | -0.077847 |
| C | 0.582212  | 1.627922  | -0.174624 |
| C | 0.328177  | 2.496455  | 1.045984  |
| H | 0.926143  | 3.399449  | 0.915774  |
| H | -0.707370 | 2.806740  | 1.154795  |
| H | 0.660917  | 2.020822  | 1.967004  |
| C | 0.265880  | 2.338451  | -1.493346 |
| H | 1.028662  | 3.105519  | -1.631405 |
| H | 0.333342  | 1.665211  | -2.350289 |
| H | -0.700432 | 2.830729  | -1.512180 |
| H | 1.644200  | 1.468231  | -0.202754 |
| C | -2.085323 | -1.743159 | -1.601071 |
| H | -2.391465 | -2.783540 | -1.712968 |
| H | -2.796357 | -1.130497 | -2.153768 |
| H | -1.115472 | -1.648324 | -2.090736 |
| C | 3.094176  | -0.232024 | -1.135686 |
| H | 4.085681  | 0.219710  | -1.099447 |
| H | 3.191552  | -1.194085 | -1.636700 |
| H | 2.473681  | 0.403973  | -1.768559 |
| H | 0.008309  | -0.090362 | -1.104137 |

47

35H+ SCF Done: -607.619526563 A.U.

|   |           |           |           |
|---|-----------|-----------|-----------|
| N | -0.777553 | 0.175820  | 0.042752  |
| C | 0.210562  | -0.963559 | 0.572331  |
| C | 1.630852  | -0.387971 | 0.858974  |
| H | 1.566404  | 0.334624  | 1.669478  |
| H | 2.148475  | -1.235125 | 1.314061  |
| C | -0.344437 | -1.503759 | 1.889670  |
| H | -1.354429 | -1.889956 | 1.782072  |
| H | 0.287007  | -2.328793 | 2.217569  |
| H | -0.338586 | -0.751157 | 2.676882  |
| C | -2.293270 | -0.158798 | -0.400520 |
| C | -2.534990 | -1.619057 | -0.790573 |
| H | -2.404013 | -2.314768 | 0.032378  |
| H | -3.579819 | -1.680415 | -1.093812 |
| H | -1.938679 | -1.931952 | -1.641548 |
| C | -2.543449 | 0.678141  | -1.661805 |
| H | -1.872767 | 0.368888  | -2.465891 |
| H | -3.563207 | 0.494755  | -1.998447 |
| H | -2.437123 | 1.745636  | -1.508941 |
| C | -3.268113 | 0.191378  | 0.725379  |

|   |           |           |           |
|---|-----------|-----------|-----------|
| H | -3.310031 | 1.251076  | 0.957699  |
| H | -4.263950 | -0.099769 | 0.393943  |
| H | -3.053325 | -0.363998 | 1.637022  |
| C | 0.349686  | -2.085564 | -0.463768 |
| H | -0.446151 | -2.815638 | -0.408364 |
| H | 0.411097  | -1.706524 | -1.482925 |
| H | 1.276230  | -2.614859 | -0.256272 |
| C | -0.715440 | 1.398034  | 0.954129  |
| C | -1.126538 | 2.733497  | 0.353171  |
| H | -0.807031 | 3.505626  | 1.054061  |
| H | -0.626198 | 2.927184  | -0.595541 |
| H | -2.197431 | 2.845119  | 0.212825  |
| H | 0.315157  | 1.489523  | 1.258275  |
| H | -1.291342 | 1.166809  | 1.842375  |
| C | 2.602086  | 0.182205  | -0.224392 |
| C | 3.686625  | 0.941046  | 0.565274  |
| H | 4.178410  | 0.282014  | 1.284280  |
| H | 4.450124  | 1.331670  | -0.109638 |
| H | 3.259504  | 1.782464  | 1.115469  |
| C | 1.954527  | 1.163897  | -1.212041 |
| H | 1.235388  | 0.674694  | -1.875655 |
| H | 1.473207  | 2.002521  | -0.708644 |
| H | 2.720221  | 1.585976  | -1.865043 |
| C | 3.302496  | -0.927212 | -1.030672 |
| H | 3.735057  | -1.681842 | -0.370582 |
| H | 2.634038  | -1.428288 | -1.728235 |
| H | 4.114750  | -0.494580 | -1.618181 |
| H | -0.341709 | 0.464674  | -0.830871 |

50

36H+ SCF Done: -646.938716823 A.U.

|   |           |           |           |
|---|-----------|-----------|-----------|
| N | -0.759403 | 0.036349  | -0.140278 |
| C | 0.271851  | -0.945877 | 0.620904  |
| C | 1.640528  | -0.246622 | 0.861784  |
| H | 1.478712  | 0.635700  | 1.476980  |
| H | 2.147367  | -0.938379 | 1.538381  |
| C | -0.269736 | -1.359438 | 1.995309  |
| H | -1.326269 | -1.602161 | 1.983771  |
| H | 0.265912  | -2.255251 | 2.308634  |
| H | -0.099341 | -0.602997 | 2.755861  |
| C | -2.275666 | -0.433234 | -0.426676 |
| C | -2.449447 | -1.956512 | -0.478444 |
| H | -2.217770 | -2.464140 | 0.451109  |
| H | -3.505847 | -2.131812 | -0.678229 |
| H | -1.893256 | -2.407984 | -1.295176 |
| C | -2.642052 | 0.072610  | -1.831966 |
| H | -1.915942 | -0.256548 | -2.578001 |
| H | -3.601214 | -0.366396 | -2.103877 |
| H | -2.751168 | 1.146985  | -1.897499 |
| C | -3.229594 | 0.134238  | 0.620889  |
| H | -3.332051 | 1.212197  | 0.551823  |
| H | -4.214745 | -0.292055 | 0.435429  |
| H | -2.941114 | -0.131465 | 1.635281  |

|   |           |           |           |
|---|-----------|-----------|-----------|
| C | 0.506176  | -2.198653 | -0.236211 |
| H | -0.271765 | -2.940961 | -0.127545 |
| H | 0.631637  | -1.974936 | -1.294306 |
| H | 1.426900  | -2.659946 | 0.111541  |
| C | -0.568329 | 1.532053  | 0.274740  |
| C | -1.109024 | 2.537666  | -0.735883 |
| H | -0.659530 | 3.499397  | -0.485021 |
| H | -0.822217 | 2.303075  | -1.760587 |
| H | -2.187255 | 2.663402  | -0.683984 |
| H | 0.504692  | 1.625326  | 0.216342  |
| C | 2.686442  | 0.096416  | -0.258117 |
| C | 3.580215  | 1.201485  | 0.336323  |
| H | 4.030100  | 0.875661  | 1.276803  |
| H | 4.387800  | 1.455046  | -0.352702 |
| H | 3.009018  | 2.111974  | 0.533705  |
| C | 2.109113  | 0.611064  | -1.588207 |
| H | 1.473254  | -0.124856 | -2.084473 |
| H | 1.556865  | 1.544486  | -1.481272 |
| H | 2.928517  | 0.816840  | -2.278995 |
| C | 3.587123  | -1.114274 | -0.572847 |
| H | 3.999293  | -1.547049 | 0.340995  |
| H | 3.060462  | -1.898406 | -1.113979 |
| H | 4.424289  | -0.797608 | -1.198023 |
| C | -0.965389 | 1.915704  | 1.698066  |
| H | -0.397353 | 2.812572  | 1.948340  |
| H | -2.017792 | 2.162139  | 1.794500  |
| H | -0.720977 | 1.163365  | 2.437624  |
| H | -0.366660 | 0.030585  | -1.079491 |

47

37H+ SCF Done: -682.685366770 A.U.

|   |           |           |           |
|---|-----------|-----------|-----------|
| N | 1.311156  | -0.050689 | -0.207512 |
| C | 2.021751  | -1.410295 | -0.093883 |
| C | 3.071254  | -1.557558 | -1.188739 |
| H | 3.937655  | -0.913648 | -1.044003 |
| H | 3.424321  | -2.588471 | -1.177960 |
| H | 2.649545  | -1.365455 | -2.176885 |
| H | 1.244395  | -2.137161 | -0.302513 |
| C | 2.563511  | -1.649875 | 1.305051  |
| H | 1.793894  | -1.544784 | 2.068887  |
| H | 2.938825  | -2.671644 | 1.353000  |
| H | 3.391998  | -0.984137 | 1.545386  |
| C | 2.293081  | 1.133349  | 0.034943  |
| C | -0.026173 | 0.039284  | 0.551095  |
| H | 0.247224  | 0.204299  | 1.588998  |
| C | -0.874396 | -1.245899 | 0.456657  |
| C | -0.867546 | 1.225954  | 0.031550  |
| H | -0.311724 | -2.102738 | 0.824191  |
| C | -1.354225 | -1.490526 | -0.984858 |
| C | -2.096030 | -1.067736 | 1.380187  |
| H | -0.288388 | 2.145111  | 0.071571  |
| C | -1.349456 | 0.974073  | -1.408644 |
| C | -2.089600 | 1.385372  | 0.955785  |



|   |           |           |           |
|---|-----------|-----------|-----------|
| H | -1.939372 | -2.412192 | -1.012887 |
| H | -0.511525 | -1.644201 | -1.667379 |
| C | -2.204936 | -0.300753 | -1.458106 |
| H | -1.766351 | -0.914346 | 2.411537  |
| H | -2.680036 | -1.990940 | 1.364130  |
| C | -2.949177 | 0.115888  | 0.908629  |
| H | -0.512499 | 0.894023  | -2.111499 |
| H | -1.928833 | 1.838406  | -1.740488 |
| H | -1.762253 | 1.585930  | 1.979814  |
| H | -2.667158 | 2.252630  | 0.627646  |
| H | -2.539892 | -0.476448 | -2.482461 |
| C | -3.422350 | -0.135779 | -0.532550 |
| H | -3.812337 | 0.232121  | 1.567603  |
| H | -4.040476 | 0.698316  | -0.875545 |
| H | -4.043413 | -1.034813 | -0.570581 |
| H | 3.271412  | 0.665614  | 0.000765  |
| C | 2.153908  | 1.788820  | 1.401322  |
| H | 1.236705  | 2.363901  | 1.509195  |
| H | 2.219384  | 1.069536  | 2.215475  |
| H | 2.989573  | 2.480422  | 1.510120  |
| C | 2.221605  | 2.120856  | -1.123338 |
| H | 1.270710  | 2.648276  | -1.168007 |
| H | 3.009146  | 2.862710  | -0.992092 |
| H | 2.394997  | 1.627015  | -2.081085 |
| H | 1.059060  | 0.016443  | -1.192964 |

62

38H+ SCF Done: -954.355990502 A.U.

|   |           |           |           |
|---|-----------|-----------|-----------|
| N | 0.067898  | 0.921251  | -0.145903 |
| C | -0.144693 | 2.458966  | -0.052944 |
| C | -0.956772 | 3.012310  | -1.213432 |
| H | -2.012100 | 2.766389  | -1.164721 |
| H | -0.871250 | 4.099075  | -1.185653 |
| H | -0.559907 | 2.679404  | -2.174378 |
| H | 0.868877  | 2.821516  | -0.203098 |
| C | -0.589328 | 2.955810  | 1.315035  |
| H | -0.062459 | 2.458481  | 2.129045  |
| H | -0.343509 | 4.016597  | 1.368633  |
| H | -1.657863 | 2.859531  | 1.476513  |
| C | 1.508202  | 0.657180  | 0.423201  |
| H | 1.604940  | 1.401628  | 1.209654  |
| C | 2.541979  | 0.937529  | -0.688461 |
| C | 1.811909  | -0.713883 | 1.052267  |
| H | 2.316244  | 1.883166  | -1.185914 |
| C | 2.559727  | -0.198718 | -1.727008 |
| C | 3.927341  | 1.050067  | -0.025687 |
| H | 1.092827  | -0.938897 | 1.841056  |
| C | 1.868616  | -1.848136 | 0.013747  |
| C | 3.202310  | -0.584089 | 1.718944  |
| H | 3.283355  | 0.049828  | -2.506292 |
| H | 1.593536  | -0.294722 | -2.235578 |
| C | 2.929378  | -1.526555 | -1.048978 |
| H | 3.931241  | 1.870983  | 0.696353  |

|   |           |           |           |
|---|-----------|-----------|-----------|
| H | 4.669705  | 1.289358  | -0.790484 |
| C | 4.275054  | -0.275549 | 0.664684  |
| H | 0.902767  | -2.005135 | -0.467831 |
| H | 2.113144  | -2.781738 | 0.525318  |
| H | 3.182371  | 0.197099  | 2.483725  |
| H | 3.428398  | -1.523995 | 2.227332  |
| H | 2.949684  | -2.323625 | -1.795171 |
| C | 4.308494  | -1.401347 | -0.381709 |
| H | 5.249411  | -0.191060 | 1.150838  |
| H | 4.578288  | -2.348275 | 0.093779  |
| H | 5.071812  | -1.188819 | -1.135207 |
| C | -1.008522 | -0.141630 | 0.256598  |
| H | -0.411624 | -0.860162 | 0.794787  |
| C | -1.564325 | -0.861797 | -0.988721 |
| C | -2.169137 | 0.209800  | 1.205737  |
| H | -0.754290 | -1.042908 | -1.702339 |
| C | -2.696316 | -0.077337 | -1.668558 |
| C | -2.114585 | -2.218634 | -0.502813 |
| H | -1.800285 | 0.757071  | 2.070140  |
| C | -3.329350 | 0.956808  | 0.528918  |
| C | -2.711061 | -1.159052 | 1.693077  |
| H | -3.052207 | -0.651063 | -2.527557 |
| H | -2.334346 | 0.871924  | -2.063212 |
| C | -3.846700 | 0.152051  | -0.673627 |
| H | -1.316989 | -2.811484 | -0.047069 |
| H | -2.484555 | -2.783522 | -1.361396 |
| C | -3.247648 | -1.977994 | 0.507110  |
| H | -3.040893 | 1.956785  | 0.216449  |
| H | -4.129754 | 1.088187  | 1.261332  |
| H | -1.926122 | -1.713633 | 2.214356  |
| H | -3.508832 | -0.978504 | 2.416980  |
| H | -4.646291 | 0.709783  | -1.166081 |
| C | -4.381353 | -1.202679 | -0.183152 |
| H | -3.621038 | -2.938250 | 0.869975  |
| H | -5.209043 | -1.046605 | 0.514059  |
| H | -4.772057 | -1.781117 | -1.024929 |
| H | 0.164212  | 0.759236  | -1.147457 |

69

39H+ SCF Done: -954.355990502 A.U.

|   |          |           |           |
|---|----------|-----------|-----------|
| N | 0.094764 | 0.406811  | -0.160108 |
| C | 1.554066 | 0.374541  | 0.420316  |
| H | 1.522777 | 1.117414  | 1.213558  |
| C | 2.535339 | 0.824360  | -0.683643 |
| C | 2.070635 | -0.936007 | 1.040488  |
| H | 2.164304 | 1.725817  | -1.175580 |
| C | 2.734648 | -0.287239 | -1.729814 |
| C | 3.883668 | 1.149725  | -0.014979 |
| H | 1.394859 | -1.279625 | 1.824510  |
| C | 2.309821 | -2.038441 | -0.006638 |
| C | 3.420514 | -0.591876 | 1.714057  |
| H | 3.407496 | 0.079014  | -2.508005 |
| H | 1.795355 | -0.536109 | -2.236980 |

|   |           |           |           |
|---|-----------|-----------|-----------|
| C | 3.310388  | -1.544220 | -1.061046 |
| H | 3.756933  | 1.955958  | 0.712757  |
| H | 4.580702  | 1.508604  | -0.775730 |
| C | 4.434690  | -0.109275 | 0.667383  |
| H | 1.382168  | -2.340378 | -0.495044 |
| H | 2.695734  | -2.926585 | 0.498716  |
| H | 3.273802  | 0.171832  | 2.482479  |
| H | 3.790878  | -1.487102 | 2.218382  |
| H | 3.459321  | -2.321505 | -1.813533 |
| C | 4.649978  | -1.207202 | -0.386906 |
| H | 5.381579  | 0.124637  | 1.158855  |
| H | 5.064887  | -2.103119 | 0.082897  |
| H | 5.372508  | -0.870700 | -1.135483 |
| C | -0.802957 | -0.806996 | 0.244431  |
| H | -0.097666 | -1.429364 | 0.770807  |
| C | -1.257245 | -1.604105 | -0.995197 |
| C | -1.989549 | -0.638074 | 1.210326  |
| H | -0.438919 | -1.657431 | -1.720350 |
| C | -2.508089 | -1.008385 | -1.658015 |
| C | -1.580514 | -3.029300 | -0.500258 |
| H | -1.693845 | -0.036815 | 2.067877  |
| C | -3.260848 | -0.081901 | 0.547786  |
| C | -2.305170 | -2.072734 | 1.706191  |
| H | -2.781964 | -1.631164 | -2.513008 |
| H | -2.306450 | -0.013498 | -2.054972 |
| C | -3.664768 | -0.961832 | -0.645253 |
| H | -0.692096 | -3.487574 | -0.057590 |
| H | -1.870655 | -3.648122 | -1.352267 |
| C | -2.721894 | -2.967978 | 0.527209  |
| H | -3.131653 | 0.947462  | 0.224707  |
| H | -4.061980 | -0.069460 | 1.291040  |
| H | -1.436609 | -2.496586 | 2.217907  |
| H | -3.112622 | -2.017503 | 2.439735  |
| H | -4.549478 | -0.537116 | -1.124714 |
| C | -3.973221 | -2.382083 | -0.146373 |
| H | -2.934161 | -3.974468 | 0.894760  |
| H | -4.804581 | -2.355323 | 0.563374  |
| H | -4.280977 | -3.017194 | -0.981652 |
| C | -0.352743 | 1.889559  | -0.087531 |
| C | -1.239363 | 2.319048  | -1.252188 |
| C | -0.879920 | 2.362089  | 1.263709  |
| H | 0.594077  | 2.404945  | -0.241458 |
| C | -1.348254 | 3.851345  | -1.255970 |
| H | -2.235851 | 1.891097  | -1.172722 |
| H | -0.810937 | 1.976443  | -2.198044 |
| C | -0.965036 | 3.895431  | 1.243623  |
| H | -1.872775 | 1.967392  | 1.458153  |
| H | -0.230685 | 2.029307  | 2.074961  |
| C | -1.843992 | 4.385564  | 0.090119  |
| H | -2.016852 | 4.159741  | -2.061350 |
| H | -0.365964 | 4.280855  | -1.478855 |
| H | -1.360144 | 4.242716  | 2.199723  |

|   |           |          |           |
|---|-----------|----------|-----------|
| H | 0.040367  | 4.317295 | 1.144447  |
| H | -1.865477 | 5.477043 | 0.072336  |
| H | -2.874217 | 4.052746 | 0.255316  |
| H | 0.224341  | 0.254683 | -1.160174 |

54

40H+ SCF Done: -799.465897242 A.U.

|   |           |           |           |
|---|-----------|-----------|-----------|
| N | -0.521324 | 0.565377  | -0.286365 |
| C | -0.718931 | 2.095765  | -0.308382 |
| C | -1.788736 | 2.511634  | -1.308379 |
| H | -2.795145 | 2.264652  | -0.978383 |
| H | -1.733432 | 3.595165  | -1.415522 |
| H | -1.619450 | 2.074112  | -2.293054 |
| H | 0.229363  | 2.440750  | -0.708324 |
| C | -0.911006 | 2.735296  | 1.063618  |
| H | -0.295243 | 2.280769  | 1.836767  |
| H | -0.610801 | 3.780204  | 0.980438  |
| H | -1.945546 | 2.716228  | 1.392384  |
| C | 0.716710  | 0.099822  | 0.516270  |
| H | 0.361087  | 0.048709  | 1.545038  |
| C | 1.925984  | 1.055773  | 0.435709  |
| C | 1.175243  | -1.303444 | 0.050317  |
| H | 1.645214  | 2.059750  | 0.745798  |
| C | 2.533381  | 1.088781  | -0.979228 |
| C | 2.987357  | 0.540027  | 1.429768  |
| H | 0.343668  | -2.006656 | 0.060541  |
| C | 1.779962  | -1.254538 | -1.364220 |
| C | 2.240069  | -1.805660 | 1.043859  |
| H | 3.375991  | 1.783764  | -0.982482 |
| H | 1.820193  | 1.470996  | -1.716899 |
| C | 2.995564  | -0.318141 | -1.384012 |
| H | 2.578531  | 0.531990  | 2.444015  |
| H | 3.829753  | 1.235612  | 1.429577  |
| C | 3.451976  | -0.865372 | 1.028007  |
| H | 1.043317  | -0.929816 | -2.108153 |
| H | 2.067715  | -2.266986 | -1.655829 |
| H | 1.815883  | -1.865813 | 2.049909  |
| H | 2.537035  | -2.817592 | 0.758770  |
| H | 3.419624  | -0.288633 | -2.389931 |
| C | 4.051885  | -0.823661 | -0.387163 |
| H | 4.201482  | -1.221014 | 1.738393  |
| H | 4.392755  | -1.820753 | -0.678996 |
| H | 4.924915  | -0.165628 | -0.404712 |
| H | -0.298986 | 0.346794  | -1.258167 |
| C | -1.739138 | -0.337160 | 0.028779  |
| C | -2.677834 | 0.175561  | 1.115048  |
| C | -2.481882 | -0.722714 | -1.250954 |
| H | -1.286784 | -1.245004 | 0.417670  |
| C | -3.720971 | -0.908806 | 1.422253  |
| H | -3.197993 | 1.074205  | 0.785435  |
| H | -2.122595 | 0.422669  | 2.019858  |
| C | -3.538337 | -1.788480 | -0.935217 |
| H | -2.968932 | 0.147380  | -1.690583 |

|   |           |           |           |
|---|-----------|-----------|-----------|
| H | -1.775187 | -1.110141 | -1.990556 |
| C | -4.490889 | -1.318835 | 0.165967  |
| H | -4.404207 | -0.534967 | 2.186675  |
| H | -3.220089 | -1.784612 | 1.847756  |
| H | -4.089499 | -2.028163 | -1.846069 |
| H | -3.037945 | -2.708731 | -0.616514 |
| H | -5.206493 | -2.108192 | 0.404299  |
| H | -5.071384 | -0.463777 | -0.196836 |

41

41H+ SCF Done: -1063.59826443 A.U.

|    |           |           |           |
|----|-----------|-----------|-----------|
| N  | 1.300287  | 0.252407  | -0.294959 |
| C  | 2.594246  | -0.613816 | 0.018162  |
| C  | 3.728857  | -0.066609 | -0.846638 |
| H  | 4.057389  | 0.918852  | -0.526873 |
| H  | 4.575080  | -0.746327 | -0.756663 |
| H  | 3.449548  | -0.024593 | -1.900861 |
| C  | 2.912929  | -0.506247 | 1.502512  |
| H  | 2.127141  | -0.922224 | 2.131314  |
| H  | 3.819501  | -1.081597 | 1.686178  |
| H  | 3.103439  | 0.521689  | 1.804466  |
| C  | -0.027377 | -0.273283 | 0.333290  |
| H  | 0.323172  | -0.938182 | 1.115958  |
| C  | -0.817681 | -1.066003 | -0.727723 |
| C  | -0.946649 | 0.774797  | 0.983676  |
| H  | -0.167073 | -1.769847 | -1.244179 |
| C  | -1.485820 | -0.127387 | -1.747118 |
| C  | -1.899816 | -1.858577 | 0.035187  |
| H  | -0.377200 | 1.366193  | 1.700489  |
| C  | -1.649182 | 1.682388  | -0.042566 |
| C  | -2.024035 | -0.033104 | 1.744523  |
| H  | -2.017010 | -0.736816 | -2.481280 |
| H  | -0.743112 | 0.446976  | -2.312758 |
| C  | -2.452278 | 0.829178  | -1.032803 |
| H  | -1.434468 | -2.546593 | 0.746178  |
| H  | -2.456385 | -2.466278 | -0.681553 |
| C  | -2.840452 | -0.885951 | 0.760055  |
| H  | -0.937421 | 2.306742  | -0.581739 |
| H  | -2.311287 | 2.362450  | 0.498530  |
| H  | -1.559110 | -0.666984 | 2.504376  |
| H  | -2.674903 | 0.669706  | 2.268786  |
| H  | -2.930382 | 1.478470  | -1.769068 |
| C  | -3.520386 | 0.024359  | -0.275473 |
| H  | -3.594870 | -1.452122 | 1.310415  |
| H  | -4.214543 | 0.706675  | 0.222208  |
| H  | -4.105350 | -0.578510 | -0.975510 |
| Cl | 1.637664  | 1.970913  | 0.009955  |
| C  | 2.292197  | -2.057457 | -0.388357 |
| H  | 1.497485  | -2.510892 | 0.198808  |
| H  | 2.059461  | -2.145432 | -1.449532 |
| H  | 3.198635  | -2.632471 | -0.202599 |
| H  | 1.182659  | 0.235007  | -1.309977 |

50

42H+ SCF Done: -722.000102280 A.U.

|   |           |           |           |
|---|-----------|-----------|-----------|
| N | 1.258252  | 0.152804  | -0.252084 |
| C | 2.272808  | -1.081586 | -0.034466 |
| C | 3.721140  | -0.658995 | -0.317105 |
| H | 4.132249  | 0.003869  | 0.442067  |
| H | 4.322274  | -1.567196 | -0.303255 |
| H | 3.840044  | -0.209070 | -1.303157 |
| C | 2.195322  | -1.602792 | 1.399373  |
| H | 1.233073  | -2.031604 | 1.660641  |
| H | 2.939010  | -2.392809 | 1.501282  |
| H | 2.442517  | -0.829737 | 2.124472  |
| C | -0.096507 | 0.032428  | 0.501053  |
| H | 0.192769  | 0.053728  | 1.548377  |
| C | -0.877555 | -1.272564 | 0.216712  |
| C | -1.061076 | 1.212343  | 0.227927  |
| H | -0.252712 | -2.141130 | 0.384673  |
| C | -1.444469 | -1.302186 | -1.213229 |
| C | -2.041409 | -1.357752 | 1.225830  |
| H | -0.566147 | 2.159464  | 0.403709  |
| C | -1.630415 | 1.174147  | -1.200527 |
| C | -2.222700 | 1.115622  | 1.238588  |
| H | -1.956894 | -2.254696 | -1.367427 |
| H | -0.647965 | -1.260308 | -1.961564 |
| C | -2.411041 | -0.128207 | -1.417683 |
| H | -1.652049 | -1.361922 | 2.247878  |
| H | -2.558122 | -2.308707 | 1.075816  |
| C | -3.004292 | -0.183984 | 1.024533  |
| H | -0.840445 | 1.260956  | -1.950676 |
| H | -2.280072 | 2.041235  | -1.341750 |
| H | -1.835331 | 1.164250  | 2.260259  |
| H | -2.872596 | 1.982995  | 1.100607  |
| H | -2.807203 | -0.153055 | -2.435132 |
| C | -3.565267 | -0.219543 | -0.406362 |
| H | -3.821588 | -0.247691 | 1.746388  |
| H | -4.259804 | 0.611401  | -0.557751 |
| H | -4.127790 | -1.143769 | -0.564758 |
| C | 1.924530  | -2.154313 | -1.074830 |
| H | 0.948336  | -2.602770 | -0.943755 |
| H | 1.988905  | -1.749240 | -2.086522 |
| H | 2.660655  | -2.953315 | -0.997462 |
| C | 1.946592  | 1.539499  | -0.088024 |
| H | 2.973812  | 1.339564  | -0.344750 |
| C | 1.941813  | 2.052480  | 1.344595  |
| H | 0.958863  | 2.351601  | 1.699911  |
| H | 2.355685  | 1.323774  | 2.039148  |
| H | 2.584384  | 2.932586  | 1.376867  |
| C | 1.490106  | 2.556972  | -1.132232 |
| H | 0.510463  | 2.986628  | -0.952386 |
| H | 2.214665  | 3.371954  | -1.119992 |
| H | 1.508199  | 2.129102  | -2.136345 |
| H | 1.039576  | 0.094870  | -1.245752 |

NH3H+ SCF Done: -57.0257019791 A.U.

|   |           |           |           |
|---|-----------|-----------|-----------|
| N | 0.000000  | 0.000000  | 0.000130  |
| H | 0.000000  | 0.963051  | 0.339953  |
| H | 0.834026  | -0.481525 | 0.339953  |
| H | -0.834026 | -0.481525 | 0.339953  |
| H | 0.000000  | 0.000000  | -1.020767 |

14

NMe3H+ SCF Done: -175.002430567 A.U.

|   |           |           |           |
|---|-----------|-----------|-----------|
| N | 0.000321  | -0.000008 | -0.339654 |
| C | -0.821962 | 1.172275  | 0.103634  |
| H | -0.372037 | 2.082213  | -0.283258 |
| H | -0.834012 | 1.189831  | 1.190178  |
| C | 1.426621  | 0.125340  | 0.103650  |
| H | 1.989854  | -0.717819 | -0.286124 |
| H | 1.448591  | 0.123139  | 1.190193  |
| C | -0.604744 | -1.297625 | 0.103652  |
| H | -0.619016 | -1.314606 | 1.190223  |
| H | -1.616036 | -1.363543 | -0.287640 |
| H | 0.000287  | -2.114774 | -0.278601 |
| H | -1.830868 | 1.057755  | -0.282575 |
| H | 1.831350  | 1.057703  | -0.279530 |
| H | 0.000152  | 0.000214  | -1.360903 |

23

NEt3H+ SCF Done: -293.001404450 A.U.

|   |           |           |           |
|---|-----------|-----------|-----------|
| N | 0.001849  | 0.000720  | 0.003384  |
| C | -0.461540 | 1.373785  | 0.447933  |
| H | 0.399714  | 2.033772  | 0.387635  |
| H | -0.740186 | 1.271571  | 1.495136  |
| C | -1.597828 | 1.907279  | -0.402693 |
| H | -2.490590 | 1.285330  | -0.350767 |
| H | -1.864393 | 2.899297  | -0.039240 |
| H | -1.296462 | 2.004619  | -1.446887 |
| C | 1.421471  | -0.282857 | 0.452807  |
| H | 1.558757  | -1.359529 | 0.406412  |
| H | 1.472558  | 0.021890  | 1.496717  |
| C | 2.453768  | 0.421611  | -0.406012 |
| H | 2.351099  | 1.505830  | -0.381030 |
| H | 3.445164  | 0.174178  | -0.027341 |
| H | 2.398766  | 0.086607  | -1.443100 |
| C | -0.955387 | -1.085810 | 0.452015  |
| H | -0.719766 | -1.280410 | 1.497384  |
| H | -1.956627 | -0.666523 | 0.401598  |
| C | -0.861264 | -2.334520 | -0.403777 |
| H | 0.124281  | -2.797271 | -0.366555 |
| H | -1.582333 | -3.062010 | -0.031976 |
| H | -1.111143 | -2.120275 | -1.444228 |
| H | 0.002909  | 0.000961  | -1.019087 |

12

PyH+ SCF Done: -248.827391169 A.U.

|   |           |           |           |
|---|-----------|-----------|-----------|
| C | -0.663721 | 1.182330  | -0.000199 |
| C | 0.713927  | 1.204900  | -0.000129 |
| C | 1.409660  | -0.000219 | 0.000061  |

|   |           |           |           |
|---|-----------|-----------|-----------|
| C | 0.713550  | -1.205122 | 0.000202  |
| C | -0.664099 | -1.182128 | 0.000136  |
| N | -1.303507 | 0.000204  | -0.000065 |
| H | 2.490922  | -0.000378 | 0.000130  |
| H | -1.280072 | 2.067938  | -0.000350 |
| H | 1.228413  | 2.153905  | -0.000229 |
| H | 1.227741  | -2.154287 | 0.000359  |
| H | -1.280745 | -2.067540 | 0.000227  |
| H | -2.317615 | 0.000370  | -0.000103 |

30

1Au SCF Done: -967.308478776 A.U.

|    |           |           |           |
|----|-----------|-----------|-----------|
| N  | -1.297545 | 0.044279  | 0.163804  |
| C  | -1.771287 | -0.105849 | 1.598470  |
| C  | -0.719187 | 0.087758  | 2.679257  |
| H  | -2.184946 | -1.102668 | 1.709251  |
| H  | -2.599871 | 0.586188  | 1.750542  |
| H  | -1.209861 | 0.034778  | 3.654106  |
| H  | 0.034873  | -0.699084 | 2.640017  |
| H  | -0.213427 | 1.048616  | 2.606394  |
| C  | -1.760500 | 1.399119  | -0.368313 |
| C  | -1.464838 | 1.590521  | -1.853891 |
| H  | -2.844279 | 1.422383  | -0.228835 |
| H  | -1.772638 | 2.596537  | -2.140047 |
| H  | -0.396715 | 1.495054  | -2.059001 |
| H  | -2.003659 | 0.893218  | -2.492056 |
| C  | -1.870869 | -1.094003 | -0.688515 |
| C  | -1.375012 | -2.466227 | -0.234044 |
| H  | -1.461727 | -0.925187 | -1.681183 |
| H  | -1.645636 | -3.197970 | -0.996098 |
| H  | -0.290959 | -2.486900 | -0.118483 |
| H  | -1.827994 | -2.790022 | 0.703337  |
| C  | -3.398580 | -1.083024 | -0.783746 |
| H  | -3.711306 | -1.923181 | -1.404594 |
| H  | -3.868974 | -1.203165 | 0.192823  |
| H  | -3.787572 | -0.176429 | -1.244118 |
| C  | -1.172130 | 2.558370  | 0.433736  |
| H  | -1.432602 | 2.517970  | 1.488996  |
| H  | -0.084568 | 2.589092  | 0.345690  |
| H  | -1.571406 | 3.491848  | 0.035915  |
| Au | 0.877192  | -0.062208 | -0.042208 |
| Cl | 3.167786  | -0.169801 | -0.310151 |

19

2Au SCF Done: -848.124306722 A.U.

|   |          |           |           |
|---|----------|-----------|-----------|
| N | 1.188129 | -0.000041 | -0.344393 |
| C | 4.038195 | 0.000069  | 0.403684  |
| C | 3.344638 | -1.255328 | -0.128158 |
| C | 1.851130 | -1.235892 | 0.180625  |
| C | 1.851050 | 1.235864  | 0.180615  |
| C | 3.344548 | 1.255396  | -0.128199 |
| H | 1.342521 | -2.094469 | -0.254120 |
| H | 3.486750 | -1.326345 | -1.211963 |
| H | 3.779045 | -2.157761 | 0.307213  |



|    |           |           |           |
|----|-----------|-----------|-----------|
| H  | 3.998442  | 0.000088  | 1.498068  |
| H  | 5.093201  | 0.000101  | 0.123753  |
| H  | 1.342361  | 2.094410  | -0.254096 |
| H  | 1.676850  | 1.254221  | 1.257078  |
| H  | 3.486631  | 1.326379  | -1.212014 |
| H  | 3.778911  | 2.157876  | 0.307115  |
| H  | 1.676905  | -1.254286 | 1.257082  |
| H  | 1.314220  | -0.000048 | -1.355491 |
| Au | -0.907004 | -0.000018 | -0.064036 |
| Cl | -3.189221 | 0.000050  | 0.232679  |

31

3Au SCF Done: -1005.45531568 A.U.

|    |           |           |           |
|----|-----------|-----------|-----------|
| N  | 0.949470  | -0.000031 | -0.395572 |
| C  | 3.825093  | -0.000254 | 0.156278  |
| C  | 3.124205  | -1.246330 | -0.370896 |
| C  | 1.629212  | -1.315634 | -0.007638 |
| C  | 1.629465  | 1.315684  | -0.007583 |
| C  | 3.124435  | 1.245987  | -0.370839 |
| H  | 3.218940  | -1.267889 | -1.461855 |
| H  | 3.604833  | -2.152756 | 0.002362  |
| H  | 3.845203  | -0.000271 | 1.248282  |
| H  | 4.867533  | -0.000330 | -0.168302 |
| H  | 3.219131  | 1.267572  | -1.461801 |
| H  | 3.605307  | 2.152284  | 0.002428  |
| H  | 0.991634  | 0.000032  | -1.414249 |
| C  | 1.432457  | 1.642847  | 1.474150  |
| H  | 1.763764  | 2.666880  | 1.650322  |
| H  | 0.380483  | 1.574012  | 1.751985  |
| H  | 2.003490  | 0.996824  | 2.134263  |
| C  | 0.971076  | 2.416137  | -0.846193 |
| H  | 0.997190  | 2.175563  | -1.911278 |
| H  | -0.067591 | 2.575892  | -0.554457 |
| H  | 1.513032  | 3.351342  | -0.701611 |
| C  | 0.970547  | -2.416042 | -0.846171 |
| H  | -0.068305 | -2.575138 | -0.554725 |
| H  | 0.997092  | -2.175678 | -1.911303 |
| H  | 1.511994  | -3.351475 | -0.701222 |
| C  | 1.432269  | -1.642843 | 1.474146  |
| H  | 2.003878  | -0.997260 | 2.134219  |
| H  | 0.380396  | -1.573397 | 1.752198  |
| H  | 1.763006  | -2.667081 | 1.650152  |
| Au | -1.178337 | 0.000052  | -0.080755 |
| Cl | -3.465957 | -0.000019 | 0.219512  |

22

4Au SCF Done: -887.448306561 A.U.

|   |           |           |           |
|---|-----------|-----------|-----------|
| N | -1.232723 | 0.863280  | 0.000013  |
| C | -2.942858 | -1.555254 | -0.000006 |
| C | -2.212999 | -1.078710 | -1.256143 |
| C | -1.981661 | 0.425355  | -1.222087 |
| C | -1.981383 | 0.425148  | 1.222248  |
| C | -2.212758 | -1.078915 | 1.256085  |
| H | -1.416197 | 0.758926  | -2.090828 |

|    |           |           |           |
|----|-----------|-----------|-----------|
| H  | -1.251993 | -1.591941 | -1.348675 |
| H  | -2.789056 | -1.314243 | -2.153321 |
| H  | -3.961968 | -1.154601 | 0.000121  |
| H  | -3.028278 | -2.643230 | -0.000082 |
| H  | -1.415671 | 0.758543  | 2.090888  |
| H  | -2.945064 | 0.949500  | 1.223878  |
| H  | -1.251783 | -1.592228 | 1.348406  |
| H  | -2.788707 | -1.314530 | 2.153316  |
| H  | -2.945348 | 0.949692  | -1.223366 |
| C  | -1.142264 | 2.347862  | 0.000141  |
| H  | -0.606365 | 2.678616  | 0.886667  |
| H  | -0.606245 | 2.678762  | -0.886262 |
| H  | -2.145341 | 2.785205  | 0.000097  |
| Au | 0.768954  | 0.087691  | -0.000028 |
| Cl | 2.933956  | -0.695995 | -0.000010 |

34

5Au SCF Done: -1044.75791926 A.U.

|    |           |           |           |
|----|-----------|-----------|-----------|
| N  | 1.003163  | 0.000001  | -0.588620 |
| C  | 2.201286  | -0.000082 | 2.099480  |
| C  | 1.575383  | 1.253597  | 1.501939  |
| C  | 1.629834  | 1.309973  | -0.033268 |
| C  | 1.629815  | -1.309954 | -0.033314 |
| C  | 1.575270  | -1.253668 | 1.501876  |
| H  | 0.529445  | 1.317986  | 1.815862  |
| H  | 2.072725  | 2.147373  | 1.884429  |
| H  | 3.282095  | -0.000119 | 1.941930  |
| H  | 2.054647  | -0.000098 | 3.181525  |
| H  | 0.529313  | -1.318024 | 1.815744  |
| H  | 2.072564  | -2.147501 | 1.884298  |
| C  | 1.012222  | 0.000029  | -2.079841 |
| H  | 0.490123  | -0.875865 | -2.447892 |
| H  | 0.489797  | 0.875733  | -2.447863 |
| H  | 2.022917  | 0.000227  | -2.484694 |
| C  | 3.073620  | -1.571420 | -0.505203 |
| H  | 3.811495  | -0.941941 | -0.021979 |
| H  | 3.321355  | -2.603440 | -0.256141 |
| H  | 3.184126  | -1.467689 | -1.582967 |
| C  | 0.797693  | -2.515081 | -0.501749 |
| H  | 0.933499  | -2.729068 | -1.560988 |
| H  | 1.127016  | -3.394074 | 0.052703  |
| H  | -0.266761 | -2.377702 | -0.306536 |
| H  | 3.183643  | 1.468470  | -1.583237 |
| C  | 3.073517  | 1.571518  | -0.505350 |
| H  | 3.321370  | 2.603375  | -0.255710 |
| H  | 3.811483  | 0.941654  | -0.022801 |
| C  | 0.797622  | 2.515090  | -0.501547 |
| H  | -0.266784 | 2.377667  | -0.306116 |
| H  | 1.127017  | 3.394093  | 0.052838  |
| H  | 0.933226  | 2.729090  | -1.560808 |
| Au | -1.151678 | 0.000003  | -0.076256 |
| Cl | -3.411850 | -0.000023 | 0.393812  |

40

6Au SCF Done: -1198.42348702 A.U.

|    |           |           |           |
|----|-----------|-----------|-----------|
| N  | 0.743997  | 0.569134  | 0.018837  |
| C  | 0.878839  | 1.298924  | 1.416061  |
| C  | 0.494500  | 0.284921  | 2.506619  |
| H  | 0.620876  | 0.760260  | 3.479690  |
| H  | -0.546334 | -0.030519 | 2.421155  |
| H  | 1.127297  | -0.599818 | 2.482846  |
| C  | 0.839447  | 1.421261  | -1.322327 |
| C  | -0.474973 | 2.169214  | -1.611841 |
| H  | -0.338051 | 2.738450  | -2.532179 |
| H  | -1.304466 | 1.481223  | -1.779496 |
| H  | -0.759471 | 2.869492  | -0.836862 |
| C  | 1.960804  | 2.470860  | -1.358773 |
| H  | 1.957092  | 2.918136  | -2.353405 |
| H  | 1.796628  | 3.275556  | -0.646397 |
| H  | 2.952399  | 2.058227  | -1.206653 |
| C  | 1.691597  | -0.576533 | -0.018839 |
| C  | 1.212660  | -1.881209 | 0.069438  |
| C  | 3.072759  | -0.404380 | -0.143952 |
| C  | 2.068651  | -2.975862 | 0.036424  |
| C  | 3.932106  | -1.495142 | -0.183333 |
| H  | 3.502956  | 0.576879  | -0.222339 |
| C  | 3.437773  | -2.790090 | -0.091892 |
| H  | 1.653572  | -3.972680 | 0.109024  |
| H  | 4.995665  | -1.322698 | -0.287282 |
| H  | 4.108787  | -3.638634 | -0.121932 |
| C  | 2.294153  | 1.797242  | 1.767785  |
| H  | 2.720435  | 2.467447  | 1.030201  |
| H  | 2.216233  | 2.354685  | 2.701785  |
| H  | 2.984885  | 0.976715  | 1.943757  |
| C  | -0.083536 | 2.486198  | 1.511029  |
| H  | -1.103332 | 2.207272  | 1.247490  |
| H  | -0.093979 | 2.829218  | 2.545666  |
| H  | 0.227694  | 3.326988  | 0.895895  |
| C  | 1.041705  | 0.434968  | -2.485071 |
| H  | 2.037183  | -0.001141 | -2.503417 |
| H  | 0.310129  | -0.373041 | -2.451561 |
| H  | 0.897242  | 0.977522  | -3.419291 |
| Au | -1.381901 | -0.245814 | -0.008866 |
| Cl | -3.549898 | -1.048987 | -0.037859 |
| H  | 0.148088  | -2.053643 | 0.167536  |

41

7Au SCF Done: -1290.70526649 A.U.

|   |           |           |           |
|---|-----------|-----------|-----------|
| N | 0.355887  | 0.670339  | 0.045291  |
| C | 0.386661  | 1.417827  | 1.442605  |
| C | 0.067533  | 0.379503  | 2.530780  |
| H | 0.114025  | 0.873760  | 3.501285  |
| H | -0.933579 | -0.038033 | 2.415796  |
| H | 0.785447  | -0.438254 | 2.542156  |
| C | 0.410071  | 1.519511  | -1.303709 |
| C | -0.964260 | 2.128285  | -1.634261 |
| H | -0.860272 | 2.703133  | -2.555244 |

|    |           |           |           |
|----|-----------|-----------|-----------|
| H  | -1.714861 | 1.358833  | -1.818877 |
| H  | -1.338991 | 2.800135  | -0.872710 |
| C  | 1.421107  | 2.675896  | -1.316892 |
| H  | 1.394305  | 3.118985  | -2.312902 |
| H  | 1.161858  | 3.461081  | -0.611260 |
| H  | 2.447470  | 2.368720  | -1.144797 |
| C  | 1.403973  | -0.377319 | 0.046640  |
| C  | 2.758756  | -0.070188 | -0.054377 |
| C  | 1.056415  | -1.722581 | 0.154199  |
| C  | 3.723512  | -1.080355 | -0.054756 |
| H  | 3.096530  | 0.944744  | -0.144958 |
| C  | 2.013228  | -2.730885 | 0.160394  |
| H  | 0.012036  | -1.995764 | 0.236235  |
| C  | 3.357631  | -2.423802 | 0.054272  |
| H  | 4.111566  | -3.198345 | 0.053965  |
| H  | 1.696714  | -3.761275 | 0.246315  |
| C  | 1.741920  | 2.044159  | 1.822369  |
| H  | 2.125792  | 2.742494  | 1.087723  |
| H  | 1.590670  | 2.601759  | 2.746986  |
| H  | 2.499479  | 1.292108  | 2.029821  |
| C  | -0.683259 | 2.510885  | 1.498268  |
| H  | -1.665531 | 2.134573  | 1.214633  |
| H  | -0.751096 | 2.862705  | 2.527639  |
| H  | -0.436593 | 3.370079  | 0.879681  |
| C  | 0.743518  | 0.548840  | -2.448945 |
| H  | 1.781061  | 0.223850  | -2.445073 |
| H  | 0.102790  | -0.333214 | -2.421923 |
| H  | 0.562205  | 1.063039  | -3.392379 |
| C  | 5.102352  | -0.720246 | -0.169114 |
| N  | 6.213434  | -0.427157 | -0.260752 |
| Au | -1.685489 | -0.345060 | -0.034309 |
| Cl | -3.755743 | -1.364402 | -0.112253 |

41

8Au SCF Done: -1290.69089082 A.U.

|   |           |           |           |
|---|-----------|-----------|-----------|
| N | -0.738309 | -0.659346 | 0.091744  |
| C | -0.876506 | -1.189558 | 1.585888  |
| C | -0.524043 | -0.031489 | 2.532188  |
| H | -0.599038 | -0.393966 | 3.557346  |
| H | 0.493204  | 0.328007  | 2.379083  |
| H | -1.211225 | 0.806517  | 2.434530  |
| C | -0.799161 | -1.729105 | -1.115445 |
| C | 0.556895  | -2.439173 | -1.301668 |
| H | 0.422730  | -3.204456 | -2.067435 |
| H | 1.327230  | -1.758870 | -1.663304 |
| H | 0.920825  | -2.934458 | -0.410630 |
| C | -1.839756 | -2.854698 | -0.975575 |
| H | -1.795925 | -3.441944 | -1.893194 |
| H | -1.609302 | -3.529292 | -0.155240 |
| H | -2.866657 | -2.523549 | -0.875927 |
| C | -1.736595 | 0.420954  | -0.108954 |
| C | -1.432981 | 1.796596  | -0.037961 |
| C | -3.072322 | 0.102423  | -0.360339 |

|    |           |           |           |
|----|-----------|-----------|-----------|
| C  | -2.427954 | 2.765477  | -0.264710 |
| C  | -4.050596 | 1.058438  | -0.582127 |
| H  | -3.372821 | -0.925551 | -0.395687 |
| C  | -3.729976 | 2.406832  | -0.547179 |
| H  | -2.148805 | 3.807844  | -0.203773 |
| H  | -5.064192 | 0.737586  | -0.782576 |
| H  | -4.479301 | 3.165993  | -0.724181 |
| C  | -2.291178 | -1.658066 | 1.970835  |
| H  | -2.669706 | -2.463069 | 1.351592  |
| H  | -2.237998 | -2.036114 | 2.992140  |
| H  | -3.009988 | -0.842156 | 1.971315  |
| C  | 0.106726  | -2.332005 | 1.854187  |
| H  | 1.129807  | -2.055951 | 1.601367  |
| H  | 0.080135  | -2.550955 | 2.921529  |
| H  | -0.156424 | -3.247673 | 1.331893  |
| C  | -1.053736 | -0.949169 | -2.415346 |
| H  | -2.082489 | -0.619454 | -2.529251 |
| H  | -0.398565 | -0.080140 | -2.487804 |
| H  | -0.823357 | -1.607452 | -3.252791 |
| C  | -0.178607 | 2.387714  | 0.329813  |
| N  | 0.670541  | 3.095522  | 0.666137  |
| Au | 1.383565  | 0.120611  | -0.083981 |
| Cl | 3.613138  | 0.720973  | -0.303018 |

41

9Au SCF Done: -1290.70530252 A.U.

|   |           |           |           |
|---|-----------|-----------|-----------|
| N | 0.115631  | 0.936965  | 0.018526  |
| C | -0.066452 | 1.669035  | 1.413717  |
| C | -0.011747 | 0.593237  | 2.510680  |
| H | -0.112307 | 1.084120  | 3.478778  |
| H | -0.824441 | -0.127983 | 2.415288  |
| H | 0.932984  | 0.053155  | 2.510433  |
| C | -0.132120 | 1.745767  | -1.334281 |
| C | -1.635302 | 1.881237  | -1.635518 |
| H | -1.738358 | 2.451352  | -2.559604 |
| H | -2.104165 | 0.910832  | -1.802574 |
| H | -2.189897 | 2.404913  | -0.867436 |
| C | 0.457226  | 3.163551  | -1.374245 |
| H | 0.273555  | 3.563130  | -2.372083 |
| H | -0.027306 | 3.833424  | -0.668355 |
| H | 1.530415  | 3.199878  | -1.219602 |
| C | 1.443792  | 0.280941  | -0.001250 |
| C | 1.540882  | -1.104239 | 0.118376  |
| C | 2.633984  | 1.003206  | -0.133882 |
| C | 2.763250  | -1.755326 | 0.106702  |
| H | 0.641421  | -1.696556 | 0.225483  |
| C | 3.864431  | 0.370080  | -0.153506 |
| H | 2.623906  | 2.072235  | -0.233153 |
| C | 3.940121  | -1.019147 | -0.031915 |
| H | 2.800206  | -2.831368 | 0.202393  |
| H | 4.766458  | 0.955703  | -0.263885 |
| C | 1.021043  | 2.703066  | 1.761590  |
| H | 1.137482  | 3.484665  | 1.019819  |

|    |           |           |           |
|----|-----------|-----------|-----------|
| H  | 0.719399  | 3.185350  | 2.691766  |
| H  | 1.986739  | 2.239213  | 1.946370  |
| C  | -1.429950 | 2.360105  | 1.490005  |
| H  | -2.244989 | 1.685055  | 1.231158  |
| H  | -1.585478 | 2.682779  | 2.519417  |
| H  | -1.485314 | 3.246141  | 0.862635  |
| C  | 0.468557  | 0.918940  | -2.483287 |
| H  | 1.555537  | 0.933558  | -2.497172 |
| H  | 0.134229  | -0.118334 | -2.442407 |
| H  | 0.120049  | 1.343695  | -3.424338 |
| C  | 5.207768  | -1.677312 | -0.050336 |
| N  | 6.231331  | -2.207430 | -0.064714 |
| Au | -1.498101 | -0.675779 | -0.012194 |
| Cl | -3.140104 | -2.298471 | -0.040201 |

53

11Au SCF Done: -1506.04937719 A.U.

|   |           |           |           |
|---|-----------|-----------|-----------|
| N | 0.187121  | 0.240204  | 0.820911  |
| C | 0.171396  | -0.038096 | 2.345150  |
| C | 1.145939  | -1.153061 | 2.712150  |
| H | 2.181322  | -0.830759 | 2.601472  |
| H | 0.984135  | -1.424906 | 3.755757  |
| H | 0.995861  | -2.045446 | 2.104452  |
| H | -0.838868 | -0.395342 | 2.533589  |
| C | 0.422113  | 1.174704  | 3.243319  |
| H | -0.255476 | 2.004788  | 3.053641  |
| H | 0.261335  | 0.857053  | 4.274447  |
| H | 1.448264  | 1.531766  | 3.168944  |
| C | 1.574066  | 0.501427  | 0.364321  |
| C | 2.287920  | -0.470982 | -0.320155 |
| C | 2.219137  | 1.716298  | 0.625466  |
| C | 3.600974  | -0.267903 | -0.734049 |
| H | 1.817840  | -1.420282 | -0.542685 |
| C | 3.521953  | 1.935554  | 0.218680  |
| H | 1.712579  | 2.518686  | 1.137804  |
| C | 4.231239  | 0.944329  | -0.464238 |
| H | 4.107697  | -1.059867 | -1.264309 |
| H | 4.008031  | 2.880613  | 0.421649  |
| O | 5.502783  | 1.255191  | -0.821357 |
| C | 6.272468  | 0.279286  | -1.520885 |
| H | 7.241966  | 0.736946  | -1.699749 |
| H | 6.402197  | -0.625873 | -0.921841 |
| H | 5.809948  | 0.021150  | -2.477115 |
| C | -0.685704 | 1.452581  | 0.478793  |
| H | -0.209678 | 2.279243  | 1.000831  |
| C | -2.146005 | 1.438021  | 0.987547  |
| C | -0.689575 | 1.843098  | -1.016927 |
| H | -2.189513 | 1.099891  | 2.022348  |
| C | -3.093062 | 0.587451  | 0.126469  |
| C | -2.626877 | 2.905998  | 0.928308  |
| H | 0.322878  | 1.779650  | -1.415450 |
| C | -1.636722 | 0.984960  | -1.869932 |
| C | -1.169926 | 3.308318  | -1.080137 |

|    |           |           |           |
|----|-----------|-----------|-----------|
| H  | -4.104157 | 0.665620  | 0.536267  |
| H  | -2.822229 | -0.470146 | 0.170522  |
| C  | -3.070303 | 1.079721  | -1.327922 |
| H  | -1.996108 | 3.537077  | 1.561689  |
| H  | -3.642857 | 2.966522  | 1.327289  |
| C  | -2.600482 | 3.411122  | -0.524296 |
| H  | -1.308531 | -0.057211 | -1.890691 |
| H  | -1.599025 | 1.342489  | -2.902964 |
| H  | -0.493207 | 3.953465  | -0.511931 |
| H  | -1.145611 | 3.652707  | -2.117451 |
| H  | -3.732547 | 0.456422  | -1.933868 |
| C  | -3.539565 | 2.543280  | -1.379039 |
| H  | -2.930335 | 4.453039  | -0.553267 |
| H  | -3.542185 | 2.901040  | -2.413037 |
| H  | -4.565435 | 2.622098  | -1.006710 |
| Au | -0.606972 | -1.633612 | -0.041049 |
| Cl | -1.437265 | -3.626747 | -0.865175 |

37

12Au SCF Done: -1084.03303658 A.U.

|   |           |           |           |
|---|-----------|-----------|-----------|
| N | 1.084338  | -0.007677 | 0.134995  |
| C | 1.573985  | 1.461062  | -0.234577 |
| C | 1.147276  | 2.426623  | 0.886882  |
| H | 1.701527  | 2.276186  | 1.808494  |
| H | 1.348804  | 3.441004  | 0.543595  |
| H | 0.081195  | 2.356249  | 1.097944  |
| C | 3.097748  | 1.576055  | -0.379040 |
| H | 3.479508  | 1.062152  | -1.256833 |
| H | 3.343284  | 2.632506  | -0.492439 |
| H | 3.627943  | 1.217358  | 0.501796  |
| C | 1.659795  | -1.208330 | -0.734331 |
| C | 1.611521  | -0.902217 | -2.233160 |
| H | 2.332637  | -0.151274 | -2.541743 |
| H | 1.857695  | -1.819186 | -2.768485 |
| H | 0.613559  | -0.597525 | -2.545737 |
| C | 0.791914  | -2.463508 | -0.524941 |
| H | -0.245381 | -2.296449 | -0.816344 |
| H | 1.189692  | -3.254643 | -1.161510 |
| H | 0.816705  | -2.826154 | 0.495914  |
| C | 3.095790  | -1.607600 | -0.342467 |
| H | 3.412090  | -2.401599 | -1.019772 |
| H | 3.816120  | -0.802980 | -0.431993 |
| H | 3.143776  | -2.010772 | 0.667299  |
| C | 0.912186  | 1.996223  | -1.516456 |
| H | 1.195781  | 1.471215  | -2.417991 |
| H | -0.175524 | 1.984571  | -1.437479 |
| H | 1.220766  | 3.035146  | -1.637785 |
| C | 1.451845  | -0.267780 | 1.552496  |
| C | 0.641893  | 0.147951  | 2.745430  |
| C | 0.796988  | -1.306469 | 2.419888  |
| H | 2.517385  | -0.174543 | 1.709114  |
| H | -0.337745 | 0.574199  | 2.583600  |
| H | 1.186342  | 0.576364  | 3.576501  |

|    |           |           |           |
|----|-----------|-----------|-----------|
| H  | 1.443929  | -1.933916 | 3.018601  |
| H  | -0.091709 | -1.797038 | 2.052086  |
| Au | -1.110623 | 0.000594  | -0.072183 |
| Cl | -3.412656 | 0.019639  | -0.271040 |

36

13Au SCF Done: -1045.94627478 A.U.

|    |           |           |           |
|----|-----------|-----------|-----------|
| N  | 1.062677  | 0.088802  | 0.005913  |
| C  | 1.558020  | -1.293194 | -0.533923 |
| C  | 1.285787  | -1.379440 | -2.047989 |
| H  | 1.909754  | -0.727036 | -2.650878 |
| H  | 1.488684  | -2.400955 | -2.367632 |
| H  | 0.238950  | -1.168750 | -2.271745 |
| C  | 3.045535  | -1.564965 | -0.250493 |
| H  | 3.218191  | -1.757925 | 0.806500  |
| H  | 3.337338  | -2.464943 | -0.793297 |
| H  | 3.703328  | -0.762869 | -0.565683 |
| C  | 1.425078  | 0.471575  | 1.454649  |
| C  | 1.012803  | -0.549642 | 2.515740  |
| H  | 1.709790  | -1.383071 | 2.588621  |
| H  | 1.017880  | -0.038914 | 3.479567  |
| H  | 0.007596  | -0.935742 | 2.355329  |
| C  | 2.859022  | 0.939697  | 1.745112  |
| H  | 2.904147  | 1.190525  | 2.806322  |
| H  | 3.613015  | 0.181592  | 1.557936  |
| H  | 3.127296  | 1.838931  | 1.200916  |
| C  | 0.768139  | -2.465142 | 0.083205  |
| H  | 0.899621  | -2.562161 | 1.152808  |
| H  | -0.298454 | -2.389938 | -0.130465 |
| H  | 1.131620  | -3.387184 | -0.372225 |
| C  | 1.366992  | 1.255623  | -0.966865 |
| C  | 2.809068  | 1.453991  | -1.463665 |
| H  | 2.783057  | 2.274220  | -2.183440 |
| H  | 3.508368  | 1.731683  | -0.681494 |
| H  | 3.209598  | 0.591798  | -1.985747 |
| C  | 0.835331  | 2.597788  | -0.453373 |
| H  | 0.831877  | 3.297405  | -1.289778 |
| H  | -0.188338 | 2.525527  | -0.084529 |
| H  | 1.459325  | 3.028309  | 0.328919  |
| H  | 0.776491  | 1.011065  | -1.844865 |
| H  | 0.791525  | 1.337609  | 1.626778  |
| Au | -1.158173 | 0.037239  | -0.007704 |
| Cl | -3.465788 | 0.035858  | -0.035829 |

39

14Au SCF Done: -1045.94627478 A.U.

|   |           |           |           |
|---|-----------|-----------|-----------|
| N | -1.029823 | -0.012547 | -0.074608 |
| C | -1.527544 | -0.960430 | 1.085714  |
| C | -1.375462 | -0.310696 | 2.470880  |
| H | -2.036721 | 0.531197  | 2.642113  |
| H | -1.628565 | -1.066777 | 3.213496  |
| H | -0.346526 | -0.007021 | 2.656120  |
| C | -2.984112 | -1.427351 | 0.914919  |
| H | -3.079889 | -2.153653 | 0.111917  |



|    |           |           |           |
|----|-----------|-----------|-----------|
| H  | -3.288420 | -1.929195 | 1.834082  |
| H  | -3.683171 | -0.618236 | 0.737689  |
| C  | -1.326138 | -0.531624 | -1.513888 |
| C  | -0.762523 | -1.912724 | -1.863960 |
| H  | -1.396227 | -2.728833 | -1.521983 |
| H  | -0.724068 | -1.971762 | -2.952931 |
| H  | 0.250292  | -2.063699 | -1.494697 |
| C  | -2.764258 | -0.468630 | -2.057810 |
| H  | -2.698042 | -0.665814 | -3.129718 |
| H  | -3.421746 | -1.220798 | -1.633626 |
| H  | -3.236817 | 0.500075  | -1.950116 |
| C  | -0.660378 | -2.235229 | 1.179020  |
| H  | -0.712865 | -2.869825 | 0.306406  |
| H  | 0.385650  | -1.997460 | 1.374659  |
| H  | -1.027113 | -2.820251 | 2.023319  |
| C  | -1.445615 | 1.526273  | 0.033185  |
| C  | -0.592541 | 2.288883  | 1.071243  |
| H  | -0.936481 | 3.323973  | 1.083320  |
| H  | -0.669444 | 1.914734  | 2.081095  |
| H  | 0.460500  | 2.299028  | 0.788899  |
| C  | -2.925638 | 1.768104  | 0.386515  |
| H  | -3.109418 | 2.841202  | 0.322116  |
| H  | -3.619371 | 1.283213  | -0.290467 |
| H  | -3.171557 | 1.464909  | 1.399586  |
| C  | -1.145052 | 2.250001  | -1.297634 |
| H  | -1.271650 | 3.317919  | -1.123018 |
| H  | -0.112273 | 2.096257  | -1.612849 |
| H  | -1.810145 | 1.982660  | -2.113369 |
| Au | 1.193667  | 0.001587  | -0.025552 |
| Cl | 3.505758  | 0.026161  | -0.031870 |
| H  | -0.749196 | 0.156383  | -2.118457 |

42

15Au SCF Done: -1124.56555587 A.U.

|   |           |           |           |
|---|-----------|-----------|-----------|
| N | 0.992022  | -0.004066 | -0.002072 |
| C | 1.416690  | 0.336961  | -1.517392 |
| C | 1.227087  | 1.826568  | -1.863409 |
| H | 1.944342  | 2.488570  | -1.393551 |
| H | 1.376702  | 1.920475  | -2.938413 |
| H | 0.216466  | 2.165601  | -1.650223 |
| C | 2.877676  | -0.015995 | -1.860173 |
| H | 3.071710  | -1.082571 | -1.882141 |
| H | 3.081134  | 0.361511  | -2.862912 |
| H | 3.594810  | 0.448075  | -1.192989 |
| C | 1.393462  | -1.500348 | 0.456538  |
| C | 1.185362  | -2.551945 | -0.652972 |
| H | 1.846714  | -2.454403 | -1.504858 |
| H | 1.396543  | -3.521705 | -0.203370 |
| H | 0.152198  | -2.579050 | -0.990950 |
| C | 0.459543  | -2.037202 | 1.571640  |
| H | -0.553157 | -2.180249 | 1.194476  |
| H | 0.836627  | -3.018527 | 1.863729  |
| H | 0.400223  | -1.441413 | 2.466278  |

|    |           |           |           |
|----|-----------|-----------|-----------|
| C  | 2.853023  | -1.641351 | 0.930791  |
| H  | 3.039349  | -2.699408 | 1.116995  |
| H  | 3.573630  | -1.315559 | 0.189251  |
| H  | 3.056187  | -1.121363 | 1.860377  |
| C  | 0.490697  | -0.351737 | -2.551203 |
| H  | 0.433530  | -1.424976 | -2.490337 |
| H  | -0.522538 | 0.046159  | -2.490656 |
| H  | 0.875779  | -0.108023 | -3.542383 |
| C  | 1.435788  | 1.135579  | 1.058450  |
| C  | 0.581799  | 2.425002  | 0.930425  |
| H  | 0.727432  | 3.002668  | 1.842608  |
| H  | 0.855071  | 3.069472  | 0.108606  |
| H  | -0.482478 | 2.200673  | 0.857893  |
| C  | 2.914607  | 1.558073  | 0.966054  |
| H  | 3.089695  | 2.296576  | 1.749624  |
| H  | 3.609807  | 0.743294  | 1.132392  |
| H  | 3.163868  | 2.038130  | 0.026475  |
| C  | 1.178333  | 0.706946  | 2.516805  |
| H  | 1.452356  | 1.551391  | 3.147393  |
| H  | 0.123370  | 0.503522  | 2.692728  |
| H  | 1.772803  | -0.132520 | 2.853341  |
| Au | -1.226861 | 0.008947  | 0.000908  |
| Cl | -3.543456 | 0.013059  | 0.004122  |

37

16Au SCF Done: -1084.08453796 A.U.

|   |           |           |           |
|---|-----------|-----------|-----------|
| N | -1.056278 | 0.022848  | 0.217959  |
| C | -1.710081 | -1.265466 | -0.440912 |
| C | -2.155190 | -0.788348 | -1.847501 |
| C | -1.605049 | 0.614301  | -2.020237 |
| C | -1.616685 | 1.215780  | -0.614457 |
| H | -3.243147 | -0.779555 | -1.911654 |
| H | -1.798432 | -1.470728 | -2.617569 |
| H | -0.579757 | 0.591288  | -2.394916 |
| H | -2.193343 | 1.220208  | -2.709002 |
| C | -0.693830 | -2.402444 | -0.590215 |
| H | -0.245871 | -2.701543 | 0.354110  |
| H | -1.208604 | -3.270704 | -1.006821 |
| H | 0.106325  | -2.132448 | -1.279755 |
| C | -2.934622 | -1.808112 | 0.315386  |
| H | -3.382649 | -2.579941 | -0.311767 |
| H | -2.686226 | -2.271934 | 1.266855  |
| H | -3.697194 | -1.052914 | 0.488641  |
| C | -0.749601 | 2.479223  | -0.608622 |
| H | -1.124400 | 3.135657  | -1.396275 |
| H | -0.785072 | 3.033693  | 0.322982  |
| H | 0.292486  | 2.253237  | -0.836088 |
| C | -3.050246 | 1.604809  | -0.214190 |
| H | -3.110811 | 1.979182  | 0.805350  |
| H | -3.379321 | 2.408012  | -0.874108 |
| H | -3.759342 | 0.788709  | -0.319207 |
| C | -1.313319 | 0.110057  | 1.716333  |
| H | -2.391078 | 0.036925  | 1.859149  |

|    |           |           |           |
|----|-----------|-----------|-----------|
| C  | -0.648814 | -1.028557 | 2.496614  |
| H  | -0.987285 | -0.975968 | 3.532355  |
| H  | -0.889779 | -2.018104 | 2.126264  |
| H  | 0.437409  | -0.920778 | 2.491006  |
| C  | -0.852833 | 1.425541  | 2.347412  |
| H  | -1.445692 | 2.281827  | 2.043426  |
| H  | -0.952475 | 1.333254  | 3.429240  |
| H  | 0.195991  | 1.627700  | 2.125034  |
| Au | 1.136708  | -0.012735 | -0.057287 |
| Cl | 3.435522  | -0.035862 | -0.319114 |

40

17Au SCF Done: -1123.34304724 A.U.

|    |           |           |           |
|----|-----------|-----------|-----------|
| N  | 0.972303  | 0.067270  | 0.015365  |
| C  | 1.333465  | -0.859751 | -1.250787 |
| C  | 1.767758  | -2.183569 | -0.602040 |
| C  | 1.127188  | -2.199889 | 0.766320  |
| C  | 1.297646  | -0.778028 | 1.312326  |
| H  | 2.853625  | -2.223844 | -0.518183 |
| H  | 1.459921  | -3.022092 | -1.224373 |
| H  | 0.064484  | -2.442434 | 0.697562  |
| H  | 1.580347  | -2.920550 | 1.444350  |
| C  | 0.033680  | -1.047748 | -2.036844 |
| H  | -0.351289 | -0.112038 | -2.435261 |
| H  | 0.228695  | -1.711226 | -2.878454 |
| H  | -0.741880 | -1.511969 | -1.424498 |
| C  | 2.447778  | -0.348537 | -2.150792 |
| H  | 2.636256  | -1.139481 | -2.878536 |
| H  | 2.189231  | 0.546910  | -2.708496 |
| H  | 3.373856  | -0.185606 | -1.605451 |
| C  | 0.273421  | -0.550474 | 2.425611  |
| H  | 0.334232  | -1.408062 | 3.096692  |
| H  | 0.457705  | 0.339564  | 3.017160  |
| H  | -0.746307 | -0.515161 | 2.038350  |
| C  | 2.716774  | -0.541814 | 1.813899  |
| H  | 2.843367  | 0.451690  | 2.235892  |
| H  | 2.909016  | -1.259947 | 2.611168  |
| H  | 3.467125  | -0.694076 | 1.040559  |
| C  | 1.214581  | 1.627117  | -0.040542 |
| C  | 0.378567  | 2.172305  | -1.204720 |
| H  | 0.493860  | 3.255472  | -1.220510 |
| H  | 0.698737  | 1.800178  | -2.172625 |
| H  | -0.683544 | 1.957659  | -1.075371 |
| C  | 0.666194  | 2.247622  | 1.249207  |
| H  | 1.288298  | 2.031674  | 2.112741  |
| H  | 0.662809  | 3.328636  | 1.116282  |
| H  | -0.358756 | 1.940879  | 1.454603  |
| C  | 2.680040  | 2.039105  | -0.208803 |
| H  | 2.738524  | 3.102253  | 0.024511  |
| H  | 3.351757  | 1.523723  | 0.468150  |
| H  | 3.041016  | 1.916357  | -1.222880 |
| Au | -1.006584 | 0.003175  | -0.001988 |
| Cl | -3.335273 | -0.072250 | -0.022408 |

28

18Au SCF Done: -966.111201103 A.U.

|    |           |           |           |
|----|-----------|-----------|-----------|
| N  | -1.262552 | 0.428594  | 0.000068  |
| C  | -2.567534 | -2.268893 | -0.000024 |
| C  | -1.914921 | -1.678580 | -1.245712 |
| C  | -1.924670 | -0.156105 | -1.218797 |
| C  | -1.924573 | -0.156212 | 1.218934  |
| C  | -1.914915 | -1.678701 | 1.245714  |
| H  | -1.414676 | 0.227490  | -2.095939 |
| H  | -0.883932 | -2.033525 | -1.330960 |
| H  | -2.436066 | -1.997222 | -2.151119 |
| H  | -3.636573 | -2.031248 | -0.000016 |
| H  | -2.481559 | -3.356925 | -0.000064 |
| H  | -1.414537 | 0.227239  | 2.096117  |
| H  | -2.958831 | 0.208030  | 1.238882  |
| H  | -0.883945 | -2.033705 | 1.330948  |
| H  | -2.436082 | -1.997395 | 2.151090  |
| H  | -2.958935 | 0.208122  | -1.238612 |
| C  | -1.465722 | 1.939505  | 0.000094  |
| H  | -2.552637 | 2.083827  | 0.000216  |
| C  | -0.892465 | 2.604111  | -1.250249 |
| H  | -1.373029 | 2.275228  | -2.168793 |
| H  | -1.046205 | 3.680503  | -1.172142 |
| H  | 0.180858  | 2.421724  | -1.332717 |
| C  | -0.892132 | 2.604231  | 1.250211  |
| H  | -1.046707 | 3.680532  | 1.172442  |
| H  | -1.371853 | 2.274837  | 2.169009  |
| H  | 0.181366  | 2.422580  | 1.331964  |
| Au | 0.835616  | -0.077123 | -0.000022 |
| Cl | 3.078770  | -0.613158 | -0.000006 |

40

19Au SCF Done: -1123.39515508 A.U.

|   |           |           |           |
|---|-----------|-----------|-----------|
| N | 0.955993  | 0.360578  | 0.000070  |
| C | 2.313561  | -2.354901 | -0.000262 |
| C | 1.599584  | -1.820480 | 1.217109  |
| C | 1.556748  | -0.283408 | 1.334420  |
| C | 1.556785  | -0.283072 | -1.334430 |
| C | 1.599633  | -1.820184 | -1.217536 |
| H | 0.571737  | -2.196239 | 1.217713  |
| H | 2.065012  | -2.188874 | 2.132509  |
| H | 3.368612  | -2.071569 | -0.000186 |
| H | 2.286729  | -3.446784 | -0.000400 |
| H | 0.571797  | -2.195972 | -1.218295 |
| H | 2.065128  | -2.188315 | -2.133010 |
| C | 1.151421  | 1.895546  | 0.000315  |
| H | 2.227733  | 2.061677  | 0.000578  |
| C | 0.579194  | 2.611224  | 1.230844  |
| H | 1.165119  | 2.461615  | 2.129065  |
| H | 0.589537  | 3.681411  | 1.030642  |
| H | -0.453486 | 2.320825  | 1.426654  |
| C | 0.579796  | 2.611581  | -1.230264 |
| H | 0.590530  | 3.681733  | -1.029889 |

|    |           |           |           |
|----|-----------|-----------|-----------|
| H  | 1.165884  | 2.461877  | -2.128356 |
| H  | -0.452951 | 2.321610  | -1.426362 |
| C  | 2.961226  | 0.240197  | 1.677575  |
| H  | 2.988442  | 1.318027  | 1.817474  |
| H  | 3.259835  | -0.210202 | 2.624970  |
| H  | 3.714159  | -0.026053 | 0.943544  |
| C  | 2.961320  | 0.240481  | -1.677470 |
| H  | 3.714439  | -0.027116 | -0.944105 |
| H  | 3.259352  | -0.208808 | -2.625572 |
| H  | 2.988977  | 1.318477  | -1.815947 |
| C  | 0.656942  | -0.043528 | -2.570799 |
| H  | 0.772228  | 0.927909  | -3.031314 |
| H  | 0.935355  | -0.783628 | -3.321234 |
| H  | -0.397968 | -0.195764 | -2.342568 |
| C  | 0.656881  | -0.044271 | 2.570842  |
| H  | -0.397971 | -0.196989 | 2.342666  |
| H  | 0.935680  | -0.784259 | 3.321247  |
| H  | 0.771747  | 0.927212  | 3.031358  |
| Au | -1.202762 | -0.075583 | -0.000005 |
| Cl | -3.471643 | -0.529992 | -0.000198 |

31

20Au SCF Done: -1005.43780000 A.U.

|    |           |           |           |
|----|-----------|-----------|-----------|
| N  | 1.216343  | -0.012901 | 0.000471  |
| C  | 1.584334  | 2.956992  | -0.000896 |
| C  | 1.167128  | 2.185782  | -1.249663 |
| C  | 1.680651  | 0.751681  | -1.209456 |
| C  | 1.653292  | 0.747729  | 1.224034  |
| C  | 1.157167  | 2.189626  | 1.246579  |
| H  | 1.357451  | 0.214963  | -2.095534 |
| H  | 0.077918  | 2.187272  | -1.346455 |
| H  | 1.566939  | 2.655704  | -2.151065 |
| H  | 2.672531  | 3.080599  | 0.002068  |
| H  | 1.149003  | 3.957882  | -0.002878 |
| H  | 1.285596  | 0.222860  | 2.099166  |
| H  | 2.745620  | 0.748326  | 1.260184  |
| H  | 0.067308  | 2.200013  | 1.335540  |
| H  | 1.552925  | 2.660009  | 2.149567  |
| H  | 2.772816  | 0.775497  | -1.203089 |
| C  | 1.786870  | -1.459868 | 0.001485  |
| C  | 1.189637  | -2.248250 | -1.171144 |
| H  | 1.436848  | -1.813284 | -2.137734 |
| H  | 1.599345  | -3.258557 | -1.155970 |
| H  | 0.104584  | -2.323432 | -1.091302 |
| C  | 1.395944  | -2.160098 | 1.309668  |
| H  | 1.624122  | -3.221775 | 1.217747  |
| H  | 1.951342  | -1.781533 | 2.166344  |
| H  | 0.328095  | -2.062933 | 1.511888  |
| C  | 3.319766  | -1.479203 | -0.129390 |
| H  | 3.814341  | -0.881793 | 0.635078  |
| H  | 3.657562  | -2.507968 | -0.003253 |
| H  | 3.657943  | -1.145543 | -1.109094 |
| Au | -0.961691 | -0.077419 | -0.002959 |

Cl -3.268931 -0.141542 0.001292

33

21Au SCF Done: -1006.62223145 A.U.

|    |           |           |           |
|----|-----------|-----------|-----------|
| N  | 1.172750  | 0.000014  | 0.000025  |
| C  | 1.594227  | -1.185064 | 0.875890  |
| C  | 0.664476  | -2.389897 | 0.708052  |
| H  | 0.621401  | -2.724297 | -0.329412 |
| H  | 1.044798  | -3.219531 | 1.305780  |
| H  | -0.350690 | -2.177075 | 1.042624  |
| C  | 3.035608  | -1.691116 | 0.720822  |
| H  | 3.791940  | -0.922485 | 0.822474  |
| H  | 3.211812  | -2.423975 | 1.509259  |
| H  | 3.178066  | -2.202033 | -0.231833 |
| C  | 1.595486  | 1.350951  | 0.587759  |
| C  | 0.665930  | 1.809241  | 1.714619  |
| H  | 0.622729  | 1.078910  | 2.523882  |
| H  | 1.046380  | 2.742143  | 2.133107  |
| H  | -0.349251 | 1.992292  | 1.363013  |
| C  | 3.037125  | 1.469350  | 1.103088  |
| H  | 3.213650  | 2.518671  | 1.342975  |
| H  | 3.180270  | 0.900391  | 2.022191  |
| H  | 3.793091  | 1.172773  | 0.386367  |
| C  | 1.593849  | -0.166348 | -1.464255 |
| C  | 3.035709  | 0.219438  | -1.825274 |
| H  | 3.211643  | -0.098049 | -2.853855 |
| H  | 3.179651  | 1.299812  | -1.792402 |
| H  | 3.791507  | -0.253269 | -1.210076 |
| C  | 0.664454  | 0.582235  | -2.423559 |
| H  | 1.044397  | 0.478718  | -3.440978 |
| H  | -0.351142 | 0.187331  | -2.406202 |
| H  | 0.622501  | 1.648115  | -2.194801 |
| H  | 1.471080  | -1.232157 | -1.652184 |
| H  | 1.473879  | 2.046320  | -0.241575 |
| H  | 1.472312  | -0.815016 | 1.892913  |
| Au | -1.073907 | 0.000191  | 0.000508  |
| Cl | -3.388931 | -0.000326 | -0.000851 |

27

22Au SCF Done: -927.998398050 A.U.

|   |          |           |           |
|---|----------|-----------|-----------|
| N | 1.231520 | 0.195846  | -0.430037 |
| C | 2.080193 | -1.011958 | -0.010123 |
| C | 1.697399 | -2.147381 | -0.966864 |
| H | 1.933930 | -1.890558 | -2.002281 |
| H | 2.255414 | -3.047476 | -0.709678 |
| H | 0.633037 | -2.377411 | -0.901323 |
| C | 3.575213 | -0.709668 | -0.166299 |
| H | 3.926253 | 0.025912  | 0.556909  |
| H | 4.139036 | -1.627613 | 0.000680  |
| H | 3.808900 | -0.353679 | -1.171482 |
| C | 1.734215 | 1.582909  | -0.097826 |
| C | 1.635716 | 1.919711  | 1.382933  |
| H | 1.895552 | 2.969291  | 1.526080  |
| H | 0.618840 | 1.765856  | 1.749199  |

|    |           |           |           |
|----|-----------|-----------|-----------|
| H  | 2.316912  | 1.327947  | 1.990215  |
| C  | 0.977828  | 2.598480  | -0.950384 |
| H  | 1.444242  | 3.578033  | -0.840197 |
| H  | 1.002656  | 2.332824  | -2.009415 |
| H  | -0.065576 | 2.680532  | -0.641039 |
| H  | 2.781916  | 1.622218  | -0.399129 |
| C  | 1.775549  | -1.439758 | 1.426790  |
| H  | 2.015912  | -0.665958 | 2.150759  |
| H  | 0.724017  | -1.703666 | 1.543112  |
| H  | 2.374681  | -2.319144 | 1.667000  |
| H  | 1.258909  | 0.166375  | -1.447631 |
| Au | -0.874969 | -0.044577 | -0.078311 |
| Cl | -3.142316 | -0.299225 | 0.260334  |

24

23Au SCF Done: -888.668659383 A.U.

|    |           |           |           |
|----|-----------|-----------|-----------|
| N  | -1.341645 | 0.003207  | -0.366903 |
| C  | -1.934604 | 1.365296  | -0.107637 |
| C  | -1.274187 | 2.398381  | -1.012776 |
| H  | -1.301130 | 2.087590  | -2.059321 |
| H  | -1.810483 | 3.344444  | -0.929871 |
| H  | -0.233748 | 2.569101  | -0.731264 |
| C  | -2.056595 | -1.151719 | 0.300669  |
| C  | -1.511134 | -2.464962 | -0.251279 |
| H  | -2.003589 | -3.302033 | 0.243587  |
| H  | -1.706313 | -2.545923 | -1.323855 |
| H  | -0.437165 | -2.558196 | -0.089312 |
| C  | -3.573546 | -1.088326 | 0.123852  |
| H  | -4.017028 | -1.991148 | 0.544314  |
| H  | -4.023205 | -0.237013 | 0.632309  |
| H  | -3.843418 | -1.044312 | -0.934313 |
| H  | -1.812921 | -1.084518 | 1.360258  |
| C  | -1.835721 | 1.744834  | 1.362313  |
| H  | -2.364104 | 1.042691  | 2.006880  |
| H  | -0.791990 | 1.786670  | 1.680216  |
| H  | -2.278887 | 2.730196  | 1.509936  |
| H  | -1.439203 | -0.152459 | -1.369956 |
| H  | -2.988023 | 1.310082  | -0.389101 |
| Au | 0.778918  | -0.058259 | -0.058382 |
| Cl | 3.060171  | -0.129187 | 0.267006  |

27

24Au SCF Done: -1387.56602110 A.U.

|   |           |           |           |
|---|-----------|-----------|-----------|
| N | 1.144471  | 0.102445  | 0.062065  |
| C | 1.708048  | 1.272837  | -0.765000 |
| C | 0.700122  | 2.412201  | -0.855624 |
| H | 0.427282  | 2.766755  | 0.139518  |
| H | 1.158593  | 3.243380  | -1.393671 |
| H | -0.204086 | 2.123771  | -1.390356 |
| C | 3.055238  | 1.839589  | -0.306729 |
| H | 3.781974  | 1.088938  | -0.021464 |
| H | 3.470186  | 2.409695  | -1.139208 |
| H | 2.922137  | 2.521897  | 0.531527  |
| C | 1.721073  | -1.301141 | -0.310908 |

|    |           |           |           |
|----|-----------|-----------|-----------|
| C  | 1.230467  | -1.634948 | -1.728106 |
| H  | 1.616837  | -0.953257 | -2.483136 |
| H  | 1.591213  | -2.633004 | -1.976912 |
| H  | 0.142143  | -1.644947 | -1.787510 |
| C  | 3.249598  | -1.351444 | -0.274612 |
| H  | 3.556016  | -2.385579 | -0.431793 |
| H  | 3.702004  | -0.754072 | -1.063534 |
| H  | 3.640158  | -1.034599 | 0.691431  |
| H  | 1.824462  | 0.832246  | -1.751818 |
| Cl | 1.506010  | 0.455139  | 1.798138  |
| C  | 1.162049  | -2.344064 | 0.661793  |
| H  | 1.565342  | -2.223429 | 1.664576  |
| H  | 0.073398  | -2.303121 | 0.714805  |
| H  | 1.444095  | -3.333222 | 0.301781  |
| Au | -1.065299 | 0.021987  | 0.005594  |
| Cl | -3.360361 | -0.074771 | -0.033756 |

24

25Au SCF Done: -1348.24544627 A.U.

|    |           |           |           |
|----|-----------|-----------|-----------|
| N  | 1.221888  | 0.060839  | 0.102044  |
| C  | 1.712674  | 1.477741  | -0.196891 |
| C  | 1.498022  | 1.809731  | -1.673229 |
| H  | 0.450481  | 1.687639  | -1.953582 |
| H  | 1.765299  | 2.855817  | -1.822284 |
| H  | 2.114372  | 1.214013  | -2.342462 |
| C  | 1.020713  | 2.512182  | 0.682390  |
| H  | 1.099454  | 2.276497  | 1.740788  |
| H  | 1.500099  | 3.477363  | 0.515566  |
| H  | -0.034509 | 2.607771  | 0.421433  |
| C  | 1.866977  | -0.997532 | -0.796143 |
| C  | 3.390018  | -0.925947 | -0.843569 |
| H  | 3.745604  | -1.711140 | -1.510803 |
| H  | 3.762809  | 0.021793  | -1.226789 |
| H  | 3.823750  | -1.101852 | 0.140559  |
| H  | 2.779264  | 1.482853  | 0.028767  |
| Cl | 1.719231  | -0.305823 | 1.806378  |
| C  | 1.394181  | -2.402080 | -0.444069 |
| H  | 1.826854  | -2.747032 | 0.493997  |
| H  | 0.307824  | -2.458799 | -0.371099 |
| H  | 1.714645  | -3.079255 | -1.236220 |
| H  | 1.457982  | -0.742465 | -1.773599 |
| Au | -0.942892 | -0.061584 | -0.002215 |
| Cl | -3.229478 | -0.175855 | -0.160176 |

18

26Au SCF Done: -1729.16323893 A.U.

|   |           |           |           |
|---|-----------|-----------|-----------|
| N | -1.158870 | -0.320352 | -0.000002 |
| C | -2.023461 | 0.990240  | -0.000021 |
| C | -1.627082 | 1.771627  | -1.254175 |
| H | -1.914686 | 1.255071  | -2.166945 |
| H | -2.150674 | 2.727135  | -1.226875 |
| H | -0.556223 | 1.973501  | -1.280265 |
| C | -3.515160 | 0.674458  | -0.000009 |
| H | -4.057741 | 1.619472  | -0.000019 |



|    |           |           |           |
|----|-----------|-----------|-----------|
| H  | -3.811878 | 0.117890  | -0.886970 |
| H  | -3.811867 | 0.117915  | 0.886971  |
| Cl | -1.567828 | -1.330791 | 1.426368  |
| C  | -1.627074 | 1.771631  | 1.254125  |
| H  | -1.914664 | 1.255070  | 2.166897  |
| H  | -0.556215 | 1.973510  | 1.280201  |
| H  | -2.150673 | 2.727135  | 1.226830  |
| Cl | -1.567818 | -1.330876 | -1.426317 |
| Au | 1.006696  | -0.030247 | -0.000004 |
| Cl | 3.268844  | 0.286226  | 0.000010  |

30

27Au SCF Done: -1426.88839268 A.U.

|    |           |           |           |
|----|-----------|-----------|-----------|
| N  | -1.073104 | -0.003293 | -0.178740 |
| C  | -1.657418 | 1.361118  | 0.371162  |
| C  | -0.826501 | 2.498588  | -0.243770 |
| H  | -0.877014 | 2.508544  | -1.329375 |
| H  | -1.225126 | 3.445377  | 0.119896  |
| H  | 0.219860  | 2.440967  | 0.057897  |
| C  | -3.132273 | 1.603823  | 0.023448  |
| H  | -3.808740 | 0.936757  | 0.544829  |
| H  | -3.375703 | 2.619481  | 0.336130  |
| H  | -3.320899 | 1.535997  | -1.045222 |
| C  | -1.603461 | -1.398105 | 0.348222  |
| C  | -3.127460 | -1.513186 | 0.314857  |
| H  | -3.388819 | -2.561029 | 0.464755  |
| H  | -3.601625 | -0.944877 | 1.110860  |
| H  | -3.537168 | -1.203337 | -0.645020 |
| Cl | -1.392366 | 0.019902  | -1.968134 |
| C  | -1.005542 | -2.504417 | -0.538820 |
| H  | -1.471367 | -2.548105 | -1.519111 |
| H  | 0.070946  | -2.384326 | -0.666567 |
| H  | -1.178257 | -3.459513 | -0.044235 |
| C  | -1.479821 | 1.417217  | 1.891379  |
| H  | -2.213662 | 0.813242  | 2.417263  |
| H  | -0.476942 | 1.124172  | 2.199107  |
| H  | -1.632648 | 2.451579  | 2.199149  |
| C  | -1.095184 | -1.642948 | 1.777745  |
| H  | -1.556487 | -1.001848 | 2.517712  |
| H  | -1.349735 | -2.670544 | 2.037169  |
| H  | -0.011998 | -1.541889 | 1.846995  |
| Au | 1.130329  | 0.012006  | -0.024331 |
| Cl | 3.422785  | 0.014298  | 0.139060  |

52

28Au SCF Done: -1426.88839268 A.U.

|   |           |          |           |
|---|-----------|----------|-----------|
| N | -0.104809 | 1.083084 | -0.015318 |
| C | -0.531042 | 2.009646 | 1.208112  |
| C | -1.614949 | 2.947223 | 0.616516  |
| C | -1.889505 | 2.464506 | -0.795135 |
| C | -0.562138 | 1.877529 | -1.280772 |
| H | -1.248414 | 3.973478 | 0.601191  |
| H | -2.227475 | 3.261554 | -1.457217 |
| C | -1.129251 | 1.187787 | 2.354841  |

|    |           |           |           |
|----|-----------|-----------|-----------|
| H  | -0.456050 | 0.414971  | 2.718920  |
| H  | -1.346240 | 1.861903  | 3.186088  |
| H  | -2.066893 | 0.715590  | 2.061318  |
| C  | 0.603815  | 2.874236  | 1.788092  |
| H  | 0.144746  | 3.561591  | 2.499803  |
| H  | 1.352379  | 2.303400  | 2.331809  |
| H  | 1.107709  | 3.480242  | 1.039521  |
| C  | -0.830078 | 1.017752  | -2.521661 |
| H  | -1.296434 | 1.659452  | -3.271747 |
| H  | 0.061179  | 0.588590  | -2.967323 |
| H  | -1.525422 | 0.206618  | -2.304970 |
| C  | 0.402506  | 3.013876  | -1.665093 |
| H  | 1.378323  | 2.650552  | -1.978990 |
| H  | -0.029539 | 3.551150  | -2.509722 |
| H  | 0.549394  | 3.734759  | -0.865835 |
| C  | 1.394117  | 0.777275  | 0.020324  |
| H  | 1.862245  | 1.756093  | 0.096125  |
| C  | 2.028042  | 0.123879  | -1.235064 |
| C  | 1.891626  | -0.037529 | 1.248676  |
| H  | 1.688729  | 0.620382  | -2.135754 |
| C  | 1.761570  | -1.383870 | -1.347929 |
| C  | 3.552227  | 0.352124  | -1.135191 |
| H  | 1.426561  | 0.324615  | 2.159575  |
| C  | 1.647441  | -1.551144 | 1.138407  |
| C  | 3.414220  | 0.193388  | 1.353982  |
| H  | 2.236719  | -1.758864 | -2.259138 |
| H  | 0.692061  | -1.585253 | -1.445863 |
| C  | 2.326226  | -2.108922 | -0.117523 |
| H  | 3.770079  | 1.423688  | -1.092176 |
| H  | 4.028245  | -0.034970 | -2.040374 |
| C  | 4.114078  | -0.358387 | 0.102483  |
| H  | 0.579011  | -1.778485 | 1.120940  |
| H  | 2.050335  | -2.033452 | 2.033874  |
| H  | 3.630402  | 1.259839  | 1.469374  |
| H  | 3.790977  | -0.308695 | 2.249220  |
| H  | 2.125769  | -3.180126 | -0.198847 |
| C  | 3.842012  | -1.867200 | -0.020560 |
| H  | 5.190404  | -0.180243 | 0.174414  |
| H  | 4.249085  | -2.394585 | 0.847395  |
| H  | 4.345401  | -2.265724 | -0.906683 |
| Au | -1.351038 | -0.741699 | 0.021278  |
| Cl | -2.703363 | -2.625623 | 0.033053  |
| H  | -2.511074 | 2.940538  | 1.235472  |
| H  | -2.654927 | 1.686615  | -0.801082 |

38

29Au SCF Done: -1122.16499704 A.U.

|   |          |           |           |
|---|----------|-----------|-----------|
| N | 1.050245 | -0.025237 | 0.000003  |
| C | 1.450099 | 0.847997  | 1.247289  |
| C | 1.378732 | 2.229459  | 0.658551  |
| C | 1.378709 | 2.229618  | -0.658021 |
| C | 1.450090 | 0.848299  | -1.247087 |
| H | 1.364083 | 3.098245  | 1.301625  |

|    |           |           |           |
|----|-----------|-----------|-----------|
| H  | 1.364044  | 3.098558  | -1.300884 |
| C  | 0.482567  | 0.750832  | 2.437154  |
| H  | 0.459913  | -0.234156 | 2.891120  |
| H  | 0.820146  | 1.458222  | 3.197213  |
| H  | -0.533446 | 1.030055  | 2.157930  |
| C  | 2.874688  | 0.641239  | 1.797776  |
| H  | 3.087750  | 1.470395  | 2.474133  |
| H  | 2.963017  | -0.276096 | 2.376685  |
| H  | 3.632225  | 0.654278  | 1.020616  |
| C  | 0.482560  | 0.751398  | -2.436979 |
| H  | 0.820065  | 1.459056  | -3.196819 |
| H  | 0.460000  | -0.233450 | -2.891252 |
| H  | -0.533479 | 1.030438  | -2.157664 |
| C  | 2.874686  | 0.641727  | -1.797634 |
| H  | 2.963136  | -0.275590 | -2.376553 |
| H  | 3.087607  | 1.470919  | -2.473992 |
| H  | 3.632248  | 0.654894  | -1.020497 |
| C  | 1.454903  | -1.532583 | -0.000185 |
| C  | 0.858584  | -2.211560 | 1.243499  |
| H  | 0.994677  | -3.288620 | 1.147449  |
| H  | 1.360491  | -1.904412 | 2.157797  |
| H  | -0.209485 | -2.018170 | 1.346055  |
| C  | 0.858812  | -2.211143 | -1.244205 |
| H  | 1.361011  | -1.903836 | -2.158289 |
| H  | 0.994711  | -3.288246 | -1.148396 |
| H  | -0.209198 | -2.017563 | -1.346993 |
| C  | 2.962283  | -1.881681 | -0.000076 |
| H  | 3.028390  | -2.970589 | -0.000701 |
| H  | 3.489284  | -1.536457 | -0.880248 |
| H  | 3.488856  | -1.537508 | 0.880770  |
| Au | -1.217957 | -0.004500 | 0.000007  |
| Cl | -3.532908 | -0.001755 | -0.000012 |

56

31Au SCF Done: -1508.25829760 A.U.

|   |           |           |           |
|---|-----------|-----------|-----------|
| N | 0.209625  | -0.730711 | 0.000094  |
| C | 1.043407  | -1.202583 | 1.252140  |
| C | 2.442932  | -1.206954 | 0.690672  |
| C | 2.442904  | -1.207049 | -0.690503 |
| C | 1.043353  | -1.202772 | -1.251906 |
| C | 0.944891  | -0.237871 | 2.442814  |
| H | -0.078479 | -0.044180 | 2.747210  |
| H | 1.463227  | -0.681353 | 3.294245  |
| H | 1.425072  | 0.714328  | 2.221876  |
| C | 0.708290  | -2.628318 | 1.743522  |
| H | 1.453694  | -2.896820 | 2.491982  |
| H | -0.268864 | -2.694964 | 2.216136  |
| H | 0.767336  | -3.371540 | 0.954510  |
| C | 0.944743  | -0.238250 | -2.442724 |
| H | 1.463052  | -0.681844 | -3.294114 |
| H | -0.078654 | -0.044651 | -2.747095 |
| H | 1.424895  | 0.714004  | -2.221959 |
| C | 0.708211  | -2.628585 | -1.743041 |

|    |           |           |           |
|----|-----------|-----------|-----------|
| H  | -0.268976 | -2.695310 | -2.215577 |
| H  | 1.453565  | -2.897202 | -2.491510 |
| H  | 0.767315  | -3.371680 | -0.953914 |
| C  | -1.211562 | -1.295304 | 0.000118  |
| H  | -1.069542 | -2.374685 | 0.000169  |
| C  | -2.084162 | -0.981364 | -1.246072 |
| C  | -2.084227 | -0.981247 | 1.246237  |
| H  | -1.518060 | -1.132839 | -2.157984 |
| C  | -2.671255 | 0.438017  | -1.247130 |
| C  | -3.249808 | -1.993156 | -1.247581 |
| H  | -1.518179 | -1.132642 | 2.158193  |
| C  | -2.671328 | 0.438131  | 1.247137  |
| C  | -3.249872 | -1.993039 | 1.247776  |
| H  | -3.269969 | 0.568672  | -2.153193 |
| H  | -1.879119 | 1.189797  | -1.285349 |
| C  | -3.539661 | 0.649769  | -0.000031 |
| H  | -2.862566 | -3.016057 | -1.281908 |
| H  | -3.845965 | -1.845816 | -2.152200 |
| C  | -4.121072 | -1.794443 | 0.000065  |
| H  | -1.879198 | 1.189918  | 1.285338  |
| H  | -3.270096 | 0.568861  | 2.153153  |
| H  | -2.862632 | -3.015936 | 1.282218  |
| H  | -3.846078 | -1.845616 | 2.152350  |
| H  | -3.940312 | 1.666410  | -0.000089 |
| C  | -4.693648 | -0.366845 | -0.000017 |
| H  | -4.937331 | -2.521696 | 0.000077  |
| H  | -5.325485 | -0.217017 | 0.880639  |
| H  | -5.325435 | -0.217099 | -0.880724 |
| C  | 3.637062  | -1.239088 | -1.399926 |
| C  | 3.637121  | -1.238895 | 1.400049  |
| C  | 4.837369  | -1.270283 | -0.696986 |
| C  | 4.837398  | -1.270187 | 0.697063  |
| H  | 3.641762  | -1.235771 | -2.482291 |
| H  | 5.775844  | -1.289458 | -1.236074 |
| H  | 5.775896  | -1.289288 | 1.236114  |
| H  | 3.641867  | -1.235425 | 2.482413  |
| Au | 0.303249  | 1.475531  | -0.000099 |
| Cl | 0.450638  | 3.787461  | -0.000323 |

42

33Au SCF Done: -1124.58482650 A.U.

|   |           |           |           |
|---|-----------|-----------|-----------|
| N | -1.023883 | -0.197283 | 0.030588  |
| C | -1.440236 | -0.359134 | -1.501497 |
| C | -1.066152 | -1.772287 | -2.003918 |
| H | -1.680900 | -2.570417 | -1.600033 |
| H | -1.206279 | -1.781885 | -3.084046 |
| H | -0.016646 | -2.000649 | -1.813917 |
| C | -2.936006 | -0.125509 | -1.789165 |
| H | -3.228168 | 0.913562  | -1.667517 |
| H | -3.117347 | -0.386860 | -2.832470 |
| H | -3.596397 | -0.735730 | -1.184498 |
| C | -1.568712 | 1.084962  | 0.792587  |
| C | -1.519450 | 2.393366  | -0.049356 |

|    |           |           |           |
|----|-----------|-----------|-----------|
| H  | -2.058743 | 2.272599  | -0.981843 |
| H  | -2.122782 | 3.101578  | 0.522100  |
| C  | -0.735836 | 1.381661  | 2.057679  |
| H  | 0.335606  | 1.383007  | 1.863479  |
| H  | -1.007837 | 2.379077  | 2.405496  |
| H  | -0.935674 | 0.697807  | 2.871673  |
| C  | -3.022711 | 0.908704  | 1.271375  |
| H  | -3.101439 | 0.148145  | 2.041598  |
| H  | -3.346478 | 1.845375  | 1.725465  |
| H  | -3.719625 | 0.672919  | 0.474768  |
| C  | -0.645241 | 0.584478  | -2.428359 |
| H  | -0.827899 | 1.636040  | -2.263440 |
| H  | 0.427759  | 0.405094  | -2.357248 |
| H  | -0.945028 | 0.366907  | -3.453924 |
| C  | -1.271946 | -1.549006 | 0.776314  |
| C  | -2.677562 | -2.177458 | 0.776480  |
| H  | -2.560243 | -3.187977 | 1.173415  |
| H  | -3.388668 | -1.663387 | 1.414709  |
| H  | -3.116529 | -2.282094 | -0.208271 |
| C  | -0.728048 | -1.637457 | 2.206294  |
| H  | -0.619840 | -2.698236 | 2.438071  |
| H  | 0.252483  | -1.179667 | 2.318972  |
| H  | -1.407003 | -1.216563 | 2.945120  |
| H  | -0.649847 | -2.228177 | 0.207389  |
| C  | -0.166288 | 3.065970  | -0.296275 |
| H  | -0.305638 | 3.921299  | -0.960543 |
| H  | 0.269855  | 3.439131  | 0.629619  |
| H  | 0.567379  | 2.407593  | -0.757523 |
| Au | 1.204530  | -0.133767 | 0.014000  |
| Cl | 3.516729  | -0.147038 | -0.003511 |

45

34Au SCF Done: -1163.90977543 A.U.

|   |           |           |           |
|---|-----------|-----------|-----------|
| N | 1.038761  | 0.038851  | 0.154358  |
| C | 1.488835  | 0.966226  | -1.075165 |
| C | 1.295517  | 2.491566  | -0.780467 |
| H | 1.922213  | 2.809038  | 0.049284  |
| H | 1.734670  | 2.975640  | -1.654825 |
| C | 2.971430  | 0.813029  | -1.480389 |
| H | 3.229355  | -0.193407 | -1.789009 |
| H | 3.145372  | 1.458874  | -2.341417 |
| H | 3.667354  | 1.120119  | -0.706835 |
| C | 1.544103  | -1.466265 | 0.136808  |
| C | 1.457517  | -2.152760 | -1.259652 |
| H | 2.007341  | -1.590185 | -2.004767 |
| H | 2.030337  | -3.074227 | -1.137420 |
| C | 0.701275  | -2.351650 | 1.079182  |
| H | -0.369082 | -2.247374 | 0.910127  |
| H | 0.965910  | -3.390977 | 0.878949  |
| H | 0.900791  | -2.169916 | 2.126773  |
| C | 2.999473  | -1.599749 | 0.630883  |
| H | 3.074524  | -1.400763 | 1.695195  |
| H | 3.317904  | -2.631745 | 0.483432  |

|    |           |           |           |
|----|-----------|-----------|-----------|
| H  | 3.704190  | -0.961282 | 0.111528  |
| C  | 0.658107  | 0.677590  | -2.340821 |
| H  | 0.907564  | -0.260990 | -2.818448 |
| H  | -0.412856 | 0.685355  | -2.146596 |
| H  | 0.863202  | 1.468263  | -3.063454 |
| C  | 1.307737  | 0.791496  | 1.490543  |
| C  | 2.742612  | 1.217141  | 1.856776  |
| H  | 2.649475  | 2.027929  | 2.582587  |
| H  | 3.315269  | 0.426712  | 2.332816  |
| H  | 3.322512  | 1.602552  | 1.028272  |
| C  | 0.678852  | 0.188959  | 2.752144  |
| H  | 0.609158  | 0.994070  | 3.485856  |
| H  | -0.328065 | -0.191136 | 2.588360  |
| H  | 1.287882  | -0.595206 | 3.196429  |
| H  | 0.760988  | 1.709660  | 1.330568  |
| C  | 0.089554  | -2.555980 | -1.814883 |
| H  | 0.223679  | -2.996544 | -2.805076 |
| H  | -0.396137 | -3.302829 | -1.188059 |
| H  | -0.599713 | -1.720700 | -1.919176 |
| C  | -0.109042 | 3.074549  | -0.612368 |
| H  | -0.033547 | 4.162972  | -0.566272 |
| H  | -0.760547 | 2.826126  | -1.449181 |
| H  | -0.610218 | 2.748191  | 0.299161  |
| Au | -1.197916 | -0.010380 | 0.104751  |
| Cl | -3.513018 | -0.017946 | 0.096460  |

48

35Au SCF Done: -1203.25568496 A.U.

|   |           |           |           |
|---|-----------|-----------|-----------|
| N | 0.287594  | 1.150336  | 0.225267  |
| C | -1.224047 | 1.166845  | -0.349091 |
| C | -2.078872 | 0.240975  | 0.584022  |
| H | -1.432948 | -0.567801 | 0.933268  |
| H | -2.345717 | 0.831292  | 1.460322  |
| C | -1.818405 | 2.579983  | -0.321704 |
| H | -1.316120 | 3.254317  | -1.009932 |
| H | -2.859388 | 2.523892  | -0.631670 |
| H | -1.804968 | 3.018592  | 0.674634  |
| C | 1.337898  | 2.146601  | -0.417028 |
| C | 1.203579  | 2.296461  | -1.936883 |
| H | 0.326186  | 2.858442  | -2.243408 |
| H | 2.074189  | 2.854697  | -2.282176 |
| H | 1.218272  | 1.331071  | -2.437624 |
| C | 2.765312  | 1.593042  | -0.215901 |
| H | 2.943168  | 0.732974  | -0.861696 |
| H | 3.473122  | 2.372386  | -0.504032 |
| H | 2.993862  | 1.304491  | 0.800628  |
| C | 1.270822  | 3.555379  | 0.205338  |
| H | 1.597278  | 3.577681  | 1.242052  |
| H | 1.949517  | 4.199577  | -0.354013 |
| H | 0.282046  | 3.999259  | 0.146064  |
| C | -1.275992 | 0.639659  | -1.785266 |
| H | -0.837220 | 1.312851  | -2.505544 |
| H | -0.798357 | -0.334411 | -1.881694 |

|    |           |           |           |
|----|-----------|-----------|-----------|
| H  | -2.317318 | 0.531336  | -2.067995 |
| C  | 0.201528  | 1.405699  | 1.722007  |
| C  | 1.431693  | 1.212997  | 2.603071  |
| H  | 1.082471  | 1.249405  | 3.637226  |
| H  | 1.894167  | 0.237574  | 2.447181  |
| H  | 2.189668  | 1.983437  | 2.492287  |
| H  | -0.530803 | 0.713597  | 2.104816  |
| H  | -0.198942 | 2.405639  | 1.882647  |
| C  | -3.400817 | -0.480548 | 0.164084  |
| C  | -3.960461 | -1.046467 | 1.488710  |
| H  | -4.187608 | -0.246966 | 2.197604  |
| H  | -4.880653 | -1.604889 | 1.305680  |
| H  | -3.244982 | -1.724252 | 1.960295  |
| C  | -3.165811 | -1.684470 | -0.767761 |
| H  | -2.927971 | -1.399261 | -1.789229 |
| H  | -2.349918 | -2.308759 | -0.396851 |
| H  | -4.067800 | -2.299491 | -0.806379 |
| C  | -4.471123 | 0.449630  | -0.424581 |
| H  | -4.677598 | 1.286414  | 0.246432  |
| H  | -4.193196 | 0.855717  | -1.397130 |
| H  | -5.403756 | -0.102533 | -0.561836 |
| Au | 0.975332  | -0.917375 | -0.028021 |
| Cl | 1.670299  | -3.110631 | -0.262190 |

38

37Au SCF Done: -1122.16499704 A.U.

|   |           |           |           |
|---|-----------|-----------|-----------|
| N | 1.050245  | -0.025237 | 0.000003  |
| C | 1.450099  | 0.847997  | 1.247289  |
| C | 1.378732  | 2.229459  | 0.658551  |
| C | 1.378709  | 2.229618  | -0.658021 |
| C | 1.450090  | 0.848299  | -1.247087 |
| H | 1.364083  | 3.098245  | 1.301625  |
| H | 1.364044  | 3.098558  | -1.300884 |
| C | 0.482567  | 0.750832  | 2.437154  |
| H | 0.459913  | -0.234156 | 2.891120  |
| H | 0.820146  | 1.458222  | 3.197213  |
| H | -0.533446 | 1.030055  | 2.157930  |
| C | 2.874688  | 0.641239  | 1.797776  |
| H | 3.087750  | 1.470395  | 2.474133  |
| H | 2.963017  | -0.276096 | 2.376685  |
| H | 3.632225  | 0.654278  | 1.020616  |
| C | 0.482560  | 0.751398  | -2.436979 |
| H | 0.820065  | 1.459056  | -3.196819 |
| H | 0.460000  | -0.233450 | -2.891252 |
| H | -0.533479 | 1.030438  | -2.157664 |
| C | 2.874686  | 0.641727  | -1.797634 |
| H | 2.963136  | -0.275590 | -2.376553 |
| H | 3.087607  | 1.470919  | -2.473992 |
| H | 3.632248  | 0.654894  | -1.020497 |
| C | 1.454903  | -1.532583 | -0.000185 |
| C | 0.858584  | -2.211560 | 1.243499  |
| H | 0.994677  | -3.288620 | 1.147449  |
| H | 1.360491  | -1.904412 | 2.157797  |

|    |           |           |           |
|----|-----------|-----------|-----------|
| H  | -0.209485 | -2.018170 | 1.346055  |
| C  | 0.858812  | -2.211143 | -1.244205 |
| H  | 1.361011  | -1.903836 | -2.158289 |
| H  | 0.994711  | -3.288246 | -1.148396 |
| H  | -0.209198 | -2.017563 | -1.346993 |
| C  | 2.962283  | -1.881681 | -0.000076 |
| H  | 3.028390  | -2.970589 | -0.000701 |
| H  | 3.489284  | -1.536457 | -0.880248 |
| H  | 3.488856  | -1.537508 | 0.880770  |
| Au | -1.217957 | -0.004500 | 0.000007  |
| Cl | -3.532908 | -0.001755 | -0.000012 |

63

38Au SCF Done: -1549.99235965 A.U.

|   |           |           |           |
|---|-----------|-----------|-----------|
| N | -0.153291 | -0.327583 | 0.611591  |
| C | -0.255568 | -0.206795 | 2.139744  |
| C | -1.152581 | 0.917217  | 2.652022  |
| H | -2.210039 | 0.685668  | 2.587219  |
| H | -0.917481 | 1.070448  | 3.706779  |
| H | -0.969438 | 1.857516  | 2.132167  |
| H | 0.752551  | 0.100262  | 2.403188  |
| C | -0.544628 | -1.498105 | 2.922933  |
| H | -0.011568 | -2.367446 | 2.546871  |
| H | -0.213909 | -1.336998 | 3.950628  |
| H | -1.601759 | -1.741132 | 2.959744  |
| C | 0.907180  | -1.419724 | 0.277794  |
| H | 0.357274  | -2.348498 | 0.440386  |
| C | 2.168135  | -1.500097 | 1.180616  |
| C | 1.410976  | -1.476073 | -1.196620 |
| H | 1.910129  | -1.416493 | 2.231278  |
| C | 3.229756  | -0.442234 | 0.840146  |
| C | 2.775559  | -2.904734 | 0.973514  |
| H | 0.586525  | -1.348106 | -1.896285 |
| C | 2.499451  | -0.446158 | -1.539100 |
| C | 2.008942  | -2.885028 | -1.405119 |
| H | 4.070845  | -0.555829 | 1.530079  |
| H | 2.835901  | 0.566941  | 0.986977  |
| C | 3.703860  | -0.616526 | -0.609402 |
| H | 2.045031  | -3.672789 | 1.245033  |
| H | 3.629234  | -3.023410 | 1.646450  |
| C | 3.222737  | -3.078892 | -0.482732 |
| H | 2.112213  | 0.572711  | -1.471439 |
| H | 2.797603  | -0.593891 | -2.581199 |
| H | 1.254818  | -3.652301 | -1.206154 |
| H | 2.309052  | -2.993313 | -2.450731 |
| H | 4.459076  | 0.138342  | -0.842007 |
| C | 4.294567  | -2.023183 | -0.803237 |
| H | 3.635232  | -4.081293 | -0.625217 |
| H | 4.643082  | -2.141420 | -1.833575 |
| H | 5.161544  | -2.162948 | -0.150399 |
| C | -1.402987 | -0.728567 | -0.213412 |
| H | -0.917655 | -1.175222 | -1.068249 |
| C | -2.269209 | 0.383794  | -0.855271 |



|    |           |           |           |
|----|-----------|-----------|-----------|
| C  | -2.355039 | -1.837483 | 0.307241  |
| H  | -1.625135 | 1.213458  | -1.155488 |
| C  | -3.412292 | 0.900857  | 0.025786  |
| C  | -2.887612 | -0.247829 | -2.124085 |
| H  | -1.793082 | -2.604780 | 0.838740  |
| C  | -3.512612 | -1.321054 | 1.181451  |
| C  | -2.980251 | -2.476014 | -0.957333 |
| H  | -3.981442 | 1.643961  | -0.540165 |
| H  | -3.029953 | 1.413340  | 0.905405  |
| C  | -4.331655 | -0.265784 | 0.423134  |
| H  | -2.097229 | -0.581975 | -2.802414 |
| H  | -3.468308 | 0.509185  | -2.657769 |
| C  | -3.795160 | -1.426070 | -1.732781 |
| H  | -3.157420 | -0.905087 | 2.119769  |
| H  | -4.152352 | -2.168273 | 1.446042  |
| H  | -2.195489 | -2.895188 | -1.593669 |
| H  | -3.628861 | -3.304570 | -0.659687 |
| H  | -5.134177 | 0.102020  | 1.067926  |
| C  | -4.931842 | -0.903144 | -0.839803 |
| H  | -4.211802 | -1.883059 | -2.634430 |
| H  | -5.601469 | -1.723339 | -0.563686 |
| H  | -5.529202 | -0.167240 | -1.386225 |
| Au | 0.508667  | 1.667142  | -0.019352 |
| Cl | 1.202213  | 3.798199  | -0.610070 |

70

39Au SCF Done: -1666.77903213 A.U.

|   |           |           |           |
|---|-----------|-----------|-----------|
| N | 0.128360  | 0.325292  | 0.254526  |
| C | -0.956217 | 1.415227  | 0.000487  |
| H | -0.398473 | 2.345893  | 0.115967  |
| C | -2.139907 | 1.491704  | 1.003896  |
| C | -1.580471 | 1.469240  | -1.426958 |
| H | -1.796298 | 1.408613  | 2.029663  |
| C | -3.220326 | 0.428277  | 0.752852  |
| C | -2.769498 | 2.892610  | 0.847530  |
| H | -0.817223 | 1.350634  | -2.194157 |
| C | -2.686010 | 0.431890  | -1.678698 |
| C | -2.201777 | 2.874735  | -1.584752 |
| H | -4.002923 | 0.538971  | 1.508908  |
| H | -2.809536 | -0.578069 | 0.869412  |
| C | -3.811624 | 0.596870  | -0.653538 |
| H | -2.022857 | 3.664783  | 1.056480  |
| H | -3.564616 | 3.007582  | 1.589345  |
| C | -3.336994 | 3.062609  | -0.566674 |
| H | -2.287494 | -0.584207 | -1.641238 |
| H | -3.069848 | 0.575818  | -2.692927 |
| H | -1.437789 | 3.645895  | -1.448146 |
| H | -2.586523 | 2.980934  | -2.602550 |
| H | -4.578923 | -0.162644 | -0.822856 |
| C | -4.424704 | 1.999933  | -0.798853 |
| H | -3.765994 | 4.062326  | -0.675330 |
| H | -4.856496 | 2.115860  | -1.797431 |
| H | -5.236633 | 2.134376  | -0.077653 |

|    |           |           |           |
|----|-----------|-----------|-----------|
| C  | 1.297655  | 0.694443  | -0.689926 |
| H  | 0.732969  | 1.084669  | -1.522669 |
| C  | 2.129210  | -0.434948 | -1.351588 |
| C  | 2.267727  | 1.844796  | -0.311609 |
| H  | 1.481832  | -1.293107 | -1.545762 |
| C  | 3.369660  | -0.880919 | -0.567890 |
| C  | 2.604628  | 0.145990  | -2.704369 |
| H  | 1.740150  | 2.623795  | 0.238457  |
| C  | 3.515813  | 1.393271  | 0.469908  |
| C  | 2.752651  | 2.435173  | -1.658288 |
| H  | 3.900590  | -1.634632 | -1.156561 |
| H  | 3.095030  | -1.361605 | 0.367685  |
| C  | 4.288987  | 0.325142  | -0.317485 |
| H  | 1.743340  | 0.424955  | -3.318155 |
| H  | 3.153762  | -0.622445 | -3.254909 |
| C  | 3.512153  | 1.364203  | -2.461364 |
| H  | 3.260594  | 1.008782  | 1.453717  |
| H  | 4.153772  | 2.266074  | 0.638176  |
| H  | 1.900578  | 2.810637  | -2.232133 |
| H  | 3.409286  | 3.287826  | -1.464193 |
| H  | 5.160668  | 0.008683  | 0.261492  |
| C  | 4.745252  | 0.913912  | -1.661614 |
| H  | 3.825308  | 1.784363  | -3.420958 |
| H  | 5.414298  | 1.762953  | -1.491657 |
| H  | 5.307824  | 0.166307  | -2.228690 |
| C  | 0.371049  | 0.233983  | 1.764880  |
| C  | 1.327228  | -0.871571 | 2.220099  |
| C  | 0.709699  | 1.537489  | 2.514276  |
| H  | -0.605020 | -0.082899 | 2.128466  |
| C  | 1.160996  | -1.111155 | 3.725749  |
| H  | 2.360482  | -0.597516 | 2.023606  |
| H  | 1.128122  | -1.795949 | 1.674548  |
| C  | 0.527336  | 1.314310  | 4.022027  |
| H  | 1.739374  | 1.834039  | 2.331918  |
| H  | 0.084319  | 2.368079  | 2.193539  |
| C  | 1.405209  | 0.168385  | 4.528154  |
| H  | 1.848278  | -1.897929 | 4.044672  |
| H  | 0.148212  | -1.479626 | 3.921607  |
| H  | 0.760889  | 2.238113  | 4.556357  |
| H  | -0.524545 | 1.088485  | 4.230962  |
| H  | 1.222901  | -0.008949 | 5.590882  |
| H  | 2.458122  | 0.456241  | 4.431968  |
| Au | -0.592924 | -1.679841 | -0.268860 |
| Cl | -1.345492 | -3.819373 | -0.747596 |

42

41Au SCF Done: -1659.25364012 A.U.

|   |           |          |           |
|---|-----------|----------|-----------|
| N | -0.028593 | 1.058680 | 0.193898  |
| C | -0.474419 | 2.364712 | -0.546425 |
| C | -1.868986 | 2.783480 | -0.073633 |
| H | -1.874398 | 3.086934 | 0.970326  |
| H | -2.190843 | 3.634712 | -0.673424 |
| H | -2.596644 | 1.982575 | -0.209270 |

|    |           |           |           |
|----|-----------|-----------|-----------|
| C  | 0.505537  | 3.516754  | -0.294166 |
| H  | 1.504739  | 3.323480  | -0.681006 |
| H  | 0.126810  | 4.402989  | -0.802866 |
| H  | 0.581982  | 3.747542  | 0.767002  |
| C  | 1.400374  | 0.645949  | -0.260131 |
| H  | 1.653980  | 1.422590  | -0.970685 |
| C  | 1.446382  | -0.686247 | -1.036898 |
| C  | 2.540202  | 0.655625  | 0.779477  |
| H  | 0.601242  | -0.735656 | -1.725903 |
| C  | 1.453413  | -1.915446 | -0.112871 |
| C  | 2.759202  | -0.667212 | -1.849641 |
| H  | 2.486441  | 1.564496  | 1.377375  |
| C  | 2.542896  | -0.588259 | 1.685544  |
| C  | 3.854673  | 0.674758  | -0.033934 |
| H  | 1.485084  | -2.818352 | -0.728213 |
| H  | 0.530833  | -1.970241 | 0.470981  |
| C  | 2.660483  | -1.858990 | 0.832090  |
| H  | 2.765733  | 0.182199  | -2.539227 |
| H  | 2.814324  | -1.573530 | -2.457952 |
| C  | 3.963007  | -0.592513 | -0.896947 |
| H  | 1.638640  | -0.634512 | 2.291673  |
| H  | 3.387393  | -0.514636 | 2.376626  |
| H  | 3.897401  | 1.569187  | -0.662503 |
| H  | 4.697957  | 0.730238  | 0.659319  |
| H  | 2.653426  | -2.736320 | 1.483658  |
| C  | 3.962688  | -1.827909 | 0.017245  |
| H  | 4.887804  | -0.559929 | -1.478658 |
| H  | 4.825460  | -1.797221 | 0.689404  |
| H  | 4.052017  | -2.738347 | -0.582753 |
| Cl | -0.068462 | 1.410594  | 1.973362  |
| C  | -0.547202 | 2.030340  | -2.043960 |
| H  | 0.415845  | 1.759783  | -2.471882 |
| H  | -1.252136 | 1.221230  | -2.235434 |
| H  | -0.900477 | 2.918296  | -2.568037 |
| Au | -1.583091 | -0.489734 | 0.007947  |
| Cl | -3.232585 | -2.081155 | -0.166193 |

51

42Au SCF Done: -1317.63369593 A.U.

|   |           |           |           |
|---|-----------|-----------|-----------|
| N | -0.051414 | 1.155751  | 0.135989  |
| C | -0.441138 | 2.122044  | -1.068412 |
| C | -1.696972 | 2.947937  | -0.734550 |
| H | -1.500933 | 3.783182  | -0.063606 |
| H | -2.069019 | 3.371193  | -1.667893 |
| H | -2.491687 | 2.326082  | -0.319914 |
| C | 0.676099  | 3.116707  | -1.432499 |
| H | 1.570948  | 2.643426  | -1.828030 |
| H | 0.291976  | 3.776840  | -2.210669 |
| H | 0.959014  | 3.747038  | -0.594187 |
| C | 1.431034  | 0.725969  | 0.057086  |
| H | 1.972881  | 1.664962  | 0.150205  |
| C | 1.940475  | 0.075439  | -1.258022 |
| C | 1.940724  | -0.175027 | 1.217549  |

|    |           |           |           |
|----|-----------|-----------|-----------|
| H  | 1.604121  | 0.635733  | -2.121413 |
| C  | 1.533110  | -1.398352 | -1.408259 |
| C  | 3.482490  | 0.160136  | -1.246016 |
| H  | 1.592883  | 0.198154  | 2.172115  |
| C  | 1.538235  | -1.650176 | 1.073294  |
| C  | 3.481942  | -0.088733 | 1.228298  |
| H  | 1.922520  | -1.776916 | -2.357796 |
| H  | 0.446392  | -1.504258 | -1.449834 |
| C  | 2.092787  | -2.219831 | -0.238635 |
| H  | 3.801568  | 1.204477  | -1.173153 |
| H  | 3.861802  | -0.224269 | -2.196858 |
| C  | 4.051010  | -0.653653 | -0.078444 |
| H  | 0.451987  | -1.765401 | 1.103189  |
| H  | 1.935009  | -2.207577 | 1.926873  |
| H  | 3.801460  | 0.949050  | 1.364367  |
| H  | 3.860504  | -0.654953 | 2.083747  |
| H  | 1.786720  | -3.263522 | -0.344566 |
| C  | 3.627822  | -2.124585 | -0.229294 |
| H  | 5.141838  | -0.579791 | -0.070881 |
| H  | 4.034821  | -2.717825 | 0.595119  |
| H  | 4.035306  | -2.537505 | -1.157081 |
| C  | -0.829188 | 1.307082  | -2.322048 |
| H  | -0.160802 | 0.489132  | -2.555454 |
| H  | -1.832768 | 0.894392  | -2.219092 |
| H  | -0.838807 | 1.981423  | -3.180351 |
| C  | -0.309758 | 1.857572  | 1.499136  |
| H  | -1.153527 | 2.499930  | 1.304009  |
| C  | 0.809756  | 2.773006  | 2.016183  |
| H  | 1.665967  | 2.229766  | 2.411556  |
| H  | 1.168210  | 3.476054  | 1.270406  |
| H  | 0.394887  | 3.361864  | 2.835388  |
| C  | -0.804546 | 0.930958  | 2.619111  |
| H  | -0.146726 | 0.095710  | 2.838343  |
| H  | -0.900173 | 1.526454  | 3.529665  |
| H  | -1.790819 | 0.528393  | 2.388811  |
| Au | -1.477541 | -0.513191 | 0.025388  |
| Cl | -3.027838 | -2.231670 | -0.093378 |

6

NH3Au SCF Done: -652.692648287 A.U.

|    |           |           |           |
|----|-----------|-----------|-----------|
| N  | 2.263090  | -0.000204 | 0.000400  |
| H  | 2.631105  | -0.097682 | 0.942730  |
| H  | 2.632069  | 0.864545  | -0.385621 |
| H  | 2.632842  | -0.767124 | -0.554638 |
| Au | 0.159672  | 0.000044  | -0.000125 |
| Cl | -2.138336 | -0.000106 | 0.000273  |

15

NMe3Au SCF Done: -770.656127494 A.U.

|   |           |           |           |
|---|-----------|-----------|-----------|
| N | -1.763923 | -0.000062 | 0.000166  |
| C | -2.267880 | -1.355961 | 0.345543  |
| H | -1.907362 | -2.073963 | -0.386894 |
| H | -3.362615 | -1.355499 | 0.346611  |
| C | -2.269269 | 0.379009  | -1.346001 |

|    |           |           |           |
|----|-----------|-----------|-----------|
| H  | -1.908155 | 1.372012  | -1.601872 |
| H  | -3.363958 | 0.378629  | -1.344626 |
| C  | -2.267791 | 0.976724  | 1.001992  |
| H  | -3.362523 | 0.975971  | 1.002530  |
| H  | -1.905429 | 0.702144  | 1.989547  |
| H  | -1.907018 | 1.971263  | 0.751564  |
| H  | -1.905319 | -1.636869 | 1.331228  |
| H  | -1.908128 | -0.334490 | -2.082516 |
| Au | 0.371065  | 0.000047  | -0.000326 |
| Cl | 2.670202  | -0.000063 | 0.000580  |

24

NEt3Au SCF Done: -888.652710406 A.U.

|    |           |           |           |
|----|-----------|-----------|-----------|
| N  | -1.477238 | 0.000108  | -0.000229 |
| C  | -1.992101 | -0.981990 | -1.017138 |
| H  | -1.573831 | -0.690257 | -1.976087 |
| H  | -3.079304 | -0.855588 | -1.075457 |
| C  | -1.651158 | -2.439803 | -0.750586 |
| H  | -2.180238 | -2.847265 | 0.109462  |
| H  | -1.943349 | -3.024158 | -1.624139 |
| H  | -0.579116 | -2.576151 | -0.598918 |
| C  | -1.992279 | 1.371572  | -0.343287 |
| H  | -1.577249 | 2.056271  | 0.390589  |
| H  | -3.079991 | 1.357465  | -0.208586 |
| C  | -1.646771 | 1.870625  | -1.737703 |
| H  | -2.173309 | 1.330166  | -2.522731 |
| H  | -1.938378 | 2.919455  | -1.807226 |
| H  | -0.574079 | 1.807245  | -1.928094 |
| C  | -1.993141 | -0.388731 | 1.358713  |
| H  | -3.080632 | -0.500145 | 1.278432  |
| H  | -1.576517 | -1.365801 | 1.585675  |
| C  | -1.650635 | 0.570529  | 2.488036  |
| H  | -2.178386 | 1.519827  | 2.411041  |
| H  | -1.943371 | 0.106480  | 3.430858  |
| H  | -0.578314 | 0.768627  | 2.530168  |
| Au | 0.674726  | -0.000082 | 0.000100  |
| Cl | 2.979407  | -0.000803 | 0.000618  |

13

PyAu SCF Done: -844.489995929 A.U.

|    |           |           |           |
|----|-----------|-----------|-----------|
| N  | 1.300910  | -0.000281 | -0.000548 |
| C  | 1.985768  | 1.158170  | -0.000340 |
| C  | 3.368784  | 1.194567  | 0.000321  |
| C  | 4.076987  | 0.000359  | 0.000647  |
| C  | 3.369334  | -1.194138 | 0.000260  |
| C  | 1.986273  | -1.158344 | -0.000287 |
| H  | 5.158683  | 0.000604  | 0.001174  |
| H  | 1.399691  | 2.064894  | -0.000772 |
| H  | 3.873263  | 2.150193  | 0.000588  |
| H  | 3.874211  | -2.149553 | 0.000364  |
| H  | 1.400586  | -2.065328 | -0.000506 |
| Au | -0.776200 | -0.000079 | -0.000138 |
| Cl | -3.071521 | 0.000216  | 0.000604  |

42

1Pd SCF Done: -960.392467857 A.U.

|    |           |           |           |
|----|-----------|-----------|-----------|
| N  | 1.861381  | -0.037360 | 0.133730  |
| C  | 2.429744  | 0.112512  | 1.514728  |
| C  | 1.420364  | -0.034179 | 2.645063  |
| H  | 2.885848  | 1.095682  | 1.600221  |
| H  | 3.246598  | -0.601768 | 1.647385  |
| H  | 1.929398  | 0.087958  | 3.605375  |
| H  | 0.642143  | 0.727156  | 2.566979  |
| H  | 0.931860  | -1.007397 | 2.637400  |
| C  | 2.279276  | -1.364188 | -0.444225 |
| C  | 1.851742  | -1.533634 | -1.902252 |
| H  | 3.374791  | -1.421505 | -0.401722 |
| H  | 2.067151  | -2.554623 | -2.220045 |
| H  | 0.776745  | -1.360524 | -2.004541 |
| H  | 2.377464  | -0.863899 | -2.581225 |
| C  | 2.287725  | 1.115390  | -0.744129 |
| C  | 1.730838  | 2.444816  | -0.234957 |
| H  | 1.807555  | 0.933682  | -1.703334 |
| H  | 1.891629  | 3.213565  | -0.992855 |
| H  | 0.656910  | 2.360747  | -0.048179 |
| H  | 2.216502  | 2.782022  | 0.682141  |
| C  | 3.799884  | 1.211527  | -0.980177 |
| H  | 4.005937  | 2.047853  | -1.650215 |
| H  | 4.345222  | 1.391036  | -0.051977 |
| H  | 4.205160  | 0.312165  | -1.443702 |
| C  | 1.727798  | -2.525378 | 0.384767  |
| H  | 2.078619  | -2.510138 | 1.415216  |
| H  | 0.634956  | -2.499415 | 0.392748  |
| H  | 2.052187  | -3.468704 | -0.057491 |
| Pd | -0.500600 | 0.028358  | 0.062992  |
| P  | -2.686493 | 0.075992  | -0.112730 |
| C  | -3.662502 | 0.265185  | 1.439322  |
| H  | -3.382767 | 1.196829  | 1.931603  |
| H  | -4.735955 | 0.274764  | 1.232287  |
| H  | -3.433649 | -0.559914 | 2.114119  |
| C  | -3.518496 | -1.396615 | -0.844425 |
| H  | -4.602928 | -1.261928 | -0.878931 |
| H  | -3.143801 | -1.559109 | -1.855202 |
| H  | -3.284069 | -2.278100 | -0.247325 |
| C  | -3.433689 | 1.415823  | -1.134120 |
| H  | -4.524435 | 1.342435  | -1.146079 |
| H  | -3.142811 | 2.384927  | -0.728225 |
| H  | -3.057052 | 1.345828  | -2.154803 |

31

2Pd SCF Done: -841.205864999 A.U.

|   |           |           |           |
|---|-----------|-----------|-----------|
| N | -1.776050 | 0.000027  | -0.374620 |
| C | -4.608873 | -0.000022 | 0.454777  |
| C | -3.933426 | 1.256581  | -0.099395 |
| C | -2.426259 | 1.226723  | 0.154281  |
| C | -2.426234 | -1.226693 | 0.154306  |
| C | -3.933398 | -1.256604 | -0.099387 |
| H | -1.933024 | 2.088141  | -0.295580 |

|    |           |           |           |
|----|-----------|-----------|-----------|
| H  | -4.113454 | 1.324774  | -1.178205 |
| H  | -4.357181 | 2.157956  | 0.350675  |
| H  | -4.528413 | -0.000019 | 1.547603  |
| H  | -5.674794 | -0.000046 | 0.216022  |
| H  | -1.933008 | -2.088102 | -0.295575 |
| H  | -2.223960 | -1.260443 | 1.227235  |
| H  | -4.113412 | -1.324803 | -1.178200 |
| H  | -4.357129 | -2.157989 | 0.350685  |
| H  | -2.223966 | 1.260431  | 1.227205  |
| H  | -1.902115 | 0.000047  | -1.384878 |
| Pd | 0.426454  | 0.000000  | -0.145905 |
| P  | 2.616383  | -0.000013 | 0.069199  |
| C  | 3.296223  | -0.001085 | 1.781099  |
| H  | 4.389282  | -0.000945 | 1.771281  |
| H  | 2.941006  | 0.882128  | 2.312367  |
| H  | 2.941218  | -0.885063 | 2.311229  |
| C  | 3.543412  | -1.415115 | -0.659583 |
| H  | 3.349941  | -1.461628 | -1.731443 |
| H  | 4.618394  | -1.310601 | -0.491332 |
| H  | 3.197404  | -2.345501 | -0.208890 |
| C  | 3.543208  | 1.416208  | -0.657679 |
| H  | 3.196943  | 2.345936  | -0.205825 |
| H  | 4.618184  | 1.311691  | -0.489385 |
| H  | 3.349890  | 1.464068  | -1.729504 |

43

3Pd SCF Done: -998.538018724 A.U.

|   |          |           |           |
|---|----------|-----------|-----------|
| N | 1.435629 | -0.000247 | -0.422661 |
| C | 4.285742 | 0.000697  | 0.266965  |
| C | 3.615490 | -1.246847 | -0.299695 |
| C | 2.099107 | -1.299786 | -0.029200 |
| C | 2.098420 | 1.299685  | -0.029257 |
| C | 3.614729 | 1.247619  | -0.300200 |
| H | 3.774773 | -1.265832 | -1.383652 |
| H | 4.075116 | -2.153576 | 0.101144  |
| H | 4.237458 | 0.000904  | 1.358713  |
| H | 5.347182 | 0.000944  | 0.008461  |
| H | 3.773740 | 1.266181  | -1.384206 |
| H | 4.073931 | 2.154786  | 0.100131  |
| H | 1.455833 | -0.000262 | -1.440622 |
| C | 1.813919 | 1.646997  | 1.436940  |
| H | 2.130794 | 2.673282  | 1.631008  |
| H | 0.744634 | 1.566602  | 1.639954  |
| H | 2.342375 | 1.003976  | 2.136024  |
| C | 1.474377 | 2.387647  | -0.910150 |
| H | 1.615652 | 2.165278  | -1.970960 |
| H | 0.402582 | 2.472523  | -0.718794 |
| H | 1.946123 | 3.349594  | -0.703190 |
| C | 1.476221 | -2.388135 | -0.910440 |
| H | 0.404475 | -2.473767 | -0.719303 |
| H | 1.617621 | -2.165484 | -1.971180 |
| H | 1.948736 | -3.349716 | -0.703521 |
| C | 1.814131 | -1.647315 | 1.436810  |

|    |           |           |           |
|----|-----------|-----------|-----------|
| H  | 2.341429  | -1.003666 | 2.136180  |
| H  | 0.744656  | -1.568179 | 1.639231  |
| H  | 2.131934  | -2.673258 | 1.631168  |
| Pd | -0.825427 | 0.000273  | -0.153283 |
| P  | -3.013682 | -0.000056 | 0.055107  |
| C  | -3.831265 | 1.599387  | 0.465408  |
| H  | -3.440861 | 1.973487  | 1.412048  |
| H  | -3.605392 | 2.331094  | -0.310538 |
| H  | -4.915034 | 1.479902  | 0.544156  |
| C  | -4.010192 | -0.514310 | -1.407126 |
| H  | -3.736986 | -1.530489 | -1.692244 |
| H  | -5.080697 | -0.476376 | -1.188740 |
| H  | -3.790580 | 0.146842  | -2.245660 |
| C  | -3.744908 | -1.086504 | 1.351256  |
| H  | -3.349221 | -0.802966 | 2.326715  |
| H  | -4.834931 | -1.004757 | 1.366390  |
| H  | -3.464482 | -2.121838 | 1.156466  |

34

4Pd SCF Done: -880.531143935 A.U.

|    |           |           |           |
|----|-----------|-----------|-----------|
| N  | 1.892545  | 0.852752  | -0.000016 |
| C  | 3.273312  | -1.752384 | -0.000374 |
| C  | 2.612353  | -1.181272 | 1.254789  |
| C  | 2.578826  | 0.341557  | 1.212720  |
| C  | 2.578164  | 0.341375  | -1.213025 |
| C  | 2.611178  | -1.181433 | -1.254989 |
| H  | 2.057382  | 0.740387  | 2.083255  |
| H  | 1.587157  | -1.554451 | 1.336071  |
| H  | 3.147803  | -1.496197 | 2.153707  |
| H  | 4.337152  | -1.490057 | -0.000936 |
| H  | 3.215307  | -2.843072 | -0.000256 |
| H  | 2.056495  | 0.740397  | -2.083316 |
| H  | 3.607880  | 0.732960  | -1.232176 |
| H  | 1.585856  | -1.554482 | -1.335393 |
| H  | 3.145698  | -1.496612 | -2.154369 |
| H  | 3.608390  | 0.733544  | 1.231485  |
| C  | 1.939373  | 2.326643  | -0.000202 |
| H  | 1.432055  | 2.709676  | -0.884155 |
| H  | 1.433691  | 2.709822  | 0.884595  |
| H  | 2.977236  | 2.689765  | -0.001232 |
| Pd | -0.307073 | 0.282358  | 0.000014  |
| P  | -2.452584 | -0.183649 | -0.000238 |
| C  | -3.605606 | 1.102313  | -0.640968 |
| H  | -4.642947 | 0.760908  | -0.592325 |
| H  | -3.498097 | 2.012258  | -0.050313 |
| H  | -3.351307 | 1.333871  | -1.675464 |
| C  | -3.004813 | -1.642436 | -0.980494 |
| H  | -2.502471 | -2.537315 | -0.612671 |
| H  | -4.086758 | -1.779823 | -0.906699 |
| H  | -2.730398 | -1.501547 | -2.026108 |
| C  | -3.240036 | -0.557362 | 1.622744  |
| H  | -3.120779 | 0.297214  | 2.289006  |
| H  | -4.304387 | -0.775902 | 1.502857  |



H -2.745195 -1.416362 2.076281  
46

5Pd SCF Done: -1037.8444668 A.U.

|    |           |           |           |
|----|-----------|-----------|-----------|
| N  | 1.535558  | -0.000583 | -0.607395 |
| C  | 2.498847  | 0.002891  | 2.154456  |
| C  | 1.910032  | 1.248675  | 1.507102  |
| C  | 2.085491  | 1.296228  | -0.020603 |
| C  | 2.090862  | -1.294196 | -0.018832 |
| C  | 1.913668  | -1.245376 | 1.508549  |
| H  | 0.837128  | 1.286837  | 1.723364  |
| H  | 2.357308  | 2.151737  | 1.929760  |
| H  | 3.588592  | 0.004361  | 2.070080  |
| H  | 2.277911  | 0.003258  | 3.224673  |
| H  | 0.840674  | -1.286165 | 1.723955  |
| H  | 2.362949  | -2.146655 | 1.932870  |
| C  | 1.604608  | -0.001655 | -2.083628 |
| H  | 1.093325  | -0.874793 | -2.475827 |
| H  | 1.093501  | 0.870940  | -2.477162 |
| H  | 2.628409  | -0.002042 | -2.470309 |
| Pd | -0.824443 | -0.002077 | -0.199879 |
| P  | -2.995579 | -0.000376 | 0.102372  |
| C  | -4.055627 | -0.566571 | -1.294486 |
| H  | -5.115156 | -0.521792 | -1.028586 |
| H  | -3.876244 | 0.064821  | -2.164869 |
| H  | -3.793302 | -1.591949 | -1.555816 |
| C  | -3.665534 | -1.042851 | 1.466129  |
| H  | -3.230848 | -0.723222 | 2.413400  |
| H  | -4.754465 | -0.964683 | 1.524244  |
| H  | -3.387851 | -2.083303 | 1.296384  |
| C  | -3.800959 | 1.609871  | 0.494367  |
| H  | -3.612000 | 2.315529  | -0.314847 |
| H  | -4.879816 | 1.490572  | 0.624962  |
| H  | -3.370403 | 2.016423  | 1.409706  |
| C  | 3.562768  | -1.593692 | -0.373134 |
| H  | 4.271106  | -0.962288 | 0.153947  |
| H  | 3.781688  | -2.626222 | -0.096510 |
| H  | 3.751100  | -1.498569 | -1.442106 |
| C  | 1.256518  | -2.476762 | -0.541587 |
| H  | 1.493366  | -2.731409 | -1.574526 |
| H  | 1.468104  | -3.356417 | 0.068171  |
| H  | 0.186854  | -2.253639 | -0.469742 |
| H  | 4.267201  | 0.973441  | 0.149113  |
| C  | 3.555543  | 1.601811  | -0.377110 |
| H  | 3.742617  | 1.507030  | -1.446343 |
| H  | 3.770618  | 2.635337  | -0.101200 |
| C  | 1.245073  | 2.474388  | -0.543539 |
| H  | 0.176327  | 2.247255  | -0.469262 |
| H  | 1.454148  | 3.355915  | 0.064379  |
| H  | 1.478572  | 2.728403  | -1.577379 |

52

6Pd SCF Done: -1191.51800169 A.U.

|   |           |           |          |
|---|-----------|-----------|----------|
| N | -1.335648 | -0.549791 | 0.005727 |
|---|-----------|-----------|----------|

|    |           |           |           |
|----|-----------|-----------|-----------|
| C  | -1.535794 | -1.245871 | 1.364539  |
| C  | -0.928486 | -0.323598 | 2.437158  |
| H  | -0.998989 | -0.808585 | 3.411881  |
| H  | 0.127256  | -0.125228 | 2.221296  |
| H  | -1.449911 | 0.630340  | 2.497529  |
| C  | -1.530148 | -1.311712 | -1.324569 |
| C  | -0.355285 | -2.271859 | -1.592345 |
| H  | -0.390864 | -2.585947 | -2.636629 |
| H  | 0.604506  | -1.767446 | -1.421438 |
| H  | -0.382331 | -3.169255 | -0.984432 |
| C  | -2.831916 | -2.122637 | -1.442106 |
| H  | -2.873205 | -2.570024 | -2.437082 |
| H  | -2.872064 | -2.936964 | -0.721573 |
| H  | -3.722305 | -1.508340 | -1.327618 |
| C  | -1.996965 | 0.755144  | -0.004851 |
| C  | -3.383921 | 0.919855  | -0.077608 |
| C  | -1.210406 | 1.904644  | 0.042993  |
| C  | -3.955087 | 2.187551  | -0.100887 |
| H  | -4.033424 | 0.061974  | -0.129581 |
| C  | -1.775353 | 3.174218  | 0.025604  |
| H  | -0.127384 | 1.789402  | 0.090055  |
| C  | -3.155310 | 3.323345  | -0.046656 |
| H  | -3.601866 | 4.309500  | -0.063653 |
| H  | -1.132462 | 4.044768  | 0.064760  |
| C  | -2.999348 | -1.513087 | 1.778138  |
| H  | -3.548480 | -2.102773 | 1.049817  |
| H  | -2.991922 | -2.073217 | 2.714875  |
| H  | -3.544206 | -0.589664 | 1.962100  |
| C  | -0.775630 | -2.575669 | 1.425872  |
| H  | 0.261024  | -2.453547 | 1.109524  |
| H  | -0.773823 | -2.924303 | 2.459202  |
| H  | -1.245363 | -3.351572 | 0.825326  |
| C  | -1.495792 | -0.278457 | -2.468032 |
| H  | -2.358659 | 0.383701  | -2.465558 |
| H  | -0.592639 | 0.331243  | -2.412380 |
| H  | -1.488104 | -0.811974 | -3.418583 |
| Pd | 1.187974  | -0.064653 | 0.005588  |
| P  | 3.344021  | 0.344536  | -0.010145 |
| C  | 4.400936  | -0.704672 | -1.094176 |
| H  | 5.452152  | -0.412690 | -1.023966 |
| H  | 4.296766  | -1.749012 | -0.799165 |
| H  | 4.068259  | -0.606494 | -2.127671 |
| C  | 4.251729  | 0.192712  | 1.585486  |
| H  | 5.313745  | 0.419151  | 1.458593  |
| H  | 3.821307  | 0.880577  | 2.313439  |
| H  | 4.143506  | -0.822233 | 1.968285  |
| C  | 3.886299  | 2.022568  | -0.542527 |
| H  | 3.446089  | 2.771034  | 0.116620  |
| H  | 4.975491  | 2.112857  | -0.514707 |
| H  | 3.535214  | 2.211360  | -1.557148 |
| H  | -5.032036 | 2.283025  | -0.163279 |

7Pd SCF Done: -1283.80207164 A.U.

|    |           |           |           |
|----|-----------|-----------|-----------|
| N  | -0.899793 | 0.819972  | -0.019727 |
| C  | -0.989746 | 1.544094  | -1.378292 |
| C  | -0.492052 | 0.557956  | -2.450489 |
| H  | -0.474795 | 1.059401  | -3.418949 |
| H  | 0.521602  | 0.214097  | -2.217184 |
| H  | -1.138641 | -0.313937 | -2.538727 |
| C  | -1.016148 | 1.588813  | 1.318105  |
| C  | 0.275987  | 2.371953  | 1.615771  |
| H  | 0.255463  | 2.697099  | 2.656948  |
| H  | 1.158171  | 1.733142  | 1.477448  |
| H  | 0.396402  | 3.257927  | 1.002848  |
| C  | -2.194345 | 2.571603  | 1.418486  |
| H  | -2.192413 | 3.012731  | 2.416839  |
| H  | -2.106658 | 3.388494  | 0.705353  |
| H  | -3.160883 | 2.090675  | 1.283791  |
| C  | -1.717429 | -0.386513 | -0.034343 |
| C  | -3.109789 | -0.369217 | 0.030973  |
| C  | -1.086709 | -1.628528 | -0.105345 |
| C  | -3.838254 | -1.563137 | 0.027679  |
| H  | -3.649382 | 0.559637  | 0.099060  |
| C  | -1.806274 | -2.817463 | -0.115083 |
| H  | 0.002794  | -1.647960 | -0.148338 |
| C  | -3.189479 | -2.799069 | -0.048029 |
| H  | -3.762526 | -3.715912 | -0.051437 |
| H  | -1.280466 | -3.761351 | -0.171509 |
| C  | -2.401792 | 1.998960  | -1.804088 |
| H  | -2.877198 | 2.655405  | -1.081177 |
| H  | -2.312824 | 2.552950  | -2.739965 |
| H  | -3.061305 | 1.155250  | -1.998275 |
| C  | -0.062150 | 2.763048  | -1.414936 |
| H  | 0.947100  | 2.500964  | -1.094536 |
| H  | -0.006506 | 3.122597  | -2.442841 |
| H  | -0.430921 | 3.584982  | -0.805587 |
| C  | -1.147316 | 0.549495  | 2.449016  |
| H  | -2.098999 | 0.022600  | 2.434474  |
| H  | -0.343170 | -0.186405 | 2.396576  |
| H  | -1.072097 | 1.066289  | 3.405472  |
| C  | -5.264372 | -1.509554 | 0.104114  |
| N  | -6.415099 | -1.463430 | 0.165314  |
| Pd | 1.547324  | 0.012804  | 0.014285  |
| P  | 3.618889  | -0.720545 | 0.029951  |
| C  | 4.961741  | 0.532057  | -0.104958 |
| H  | 5.946523  | 0.057820  | -0.085025 |
| H  | 4.847908  | 1.086449  | -1.036668 |
| H  | 4.884343  | 1.235952  | 0.723865  |
| C  | 4.117165  | -1.890743 | -1.301658 |
| H  | 5.164418  | -2.186190 | -1.196512 |
| H  | 3.486418  | -2.778784 | -1.257340 |
| H  | 3.972650  | -1.416657 | -2.272603 |
| C  | 4.176048  | -1.649570 | 1.518865  |
| H  | 3.546928  | -2.529537 | 1.653887  |

|   |          |           |          |
|---|----------|-----------|----------|
| H | 5.218611 | -1.962925 | 1.419631 |
| H | 4.072917 | -1.016523 | 2.400288 |

65

11Pd SCF Done: -1499.14058112 A.U.

|   |           |           |           |
|---|-----------|-----------|-----------|
| N | -0.614317 | -0.547695 | 0.896623  |
| C | -0.523787 | -0.447503 | 2.409208  |
| C | -0.784297 | 0.980322  | 2.880975  |
| H | -1.827385 | 1.266125  | 2.738738  |
| H | -0.552122 | 1.054574  | 3.944726  |
| H | -0.152462 | 1.688362  | 2.337159  |
| H | 0.517778  | -0.675764 | 2.632745  |
| C | -1.401547 | -1.423663 | 3.201956  |
| H | -1.258824 | -2.462407 | 2.905590  |
| H | -1.137445 | -1.346409 | 4.258180  |
| H | -2.459783 | -1.178731 | 3.109794  |
| C | -1.893818 | -0.039675 | 0.400057  |
| C | -1.941724 | 1.203283  | -0.214689 |
| C | -3.092578 | -0.754601 | 0.512858  |
| C | -3.131010 | 1.745225  | -0.695070 |
| H | -1.012337 | 1.760807  | -0.320542 |
| C | -4.283810 | -0.234662 | 0.037212  |
| H | -3.107426 | -1.736282 | 0.962592  |
| C | -4.316278 | 1.023816  | -0.568861 |
| H | -3.112646 | 2.717449  | -1.164868 |
| H | -5.205700 | -0.794885 | 0.125514  |
| O | -5.535264 | 1.448369  | -1.002983 |
| C | -5.625155 | 2.722891  | -1.631885 |
| H | -6.672712 | 2.855846  | -1.890857 |
| H | -5.314377 | 3.523336  | -0.954690 |
| H | -5.018951 | 2.761461  | -2.541230 |
| C | -0.394511 | -1.955387 | 0.403148  |
| H | -1.229594 | -2.560522 | 0.767962  |
| C | 0.886396  | -2.653314 | 0.915981  |
| C | -0.419303 | -2.067566 | -1.139486 |
| H | 0.958051  | -2.566486 | 2.000089  |
| C | 2.156523  | -2.086335 | 0.267498  |
| C | 0.767133  | -4.149130 | 0.558438  |
| H | -1.290308 | -1.537581 | -1.526555 |
| C | 0.854954  | -1.502671 | -1.782336 |
| C | -0.537239 | -3.561425 | -1.497230 |
| H | 3.031521  | -2.606758 | 0.669394  |
| H | 2.270337  | -1.021466 | 0.513243  |
| C | 2.086073  | -2.255672 | -1.257736 |
| H | -0.118455 | -4.581612 | 1.034599  |
| H | 1.636342  | -4.683748 | 0.952570  |
| C | 0.688468  | -4.322209 | -0.966280 |
| H | 0.956883  | -0.431582 | -1.559617 |
| H | 0.783514  | -1.599761 | -2.870235 |
| H | -1.455215 | -3.980660 | -1.073338 |
| H | -0.605972 | -3.671012 | -2.583475 |
| H | 2.990028  | -1.840385 | -1.712379 |
| C | 1.963624  | -3.748024 | -1.607643 |

|    |          |           |           |
|----|----------|-----------|-----------|
| H  | 0.597367 | -5.384340 | -1.211030 |
| H  | 1.926703 | -3.877398 | -2.693995 |
| H  | 2.841580 | -4.293239 | -1.246578 |
| Pd | 1.154263 | 1.045507  | 0.249302  |
| P  | 2.724263 | 2.495282  | -0.253075 |
| C  | 2.461993 | 4.271914  | 0.156820  |
| H  | 3.314002 | 4.881048  | -0.156924 |
| H  | 1.561072 | 4.628755  | -0.342812 |
| H  | 2.320593 | 4.377931  | 1.232627  |
| C  | 3.174041 | 2.628831  | -2.034723 |
| H  | 3.977599 | 3.354083  | -2.188227 |
| H  | 3.495006 | 1.652415  | -2.398349 |
| H  | 2.298292 | 2.934930  | -2.607292 |
| C  | 4.390244 | 2.227032  | 0.486583  |
| H  | 4.754012 | 1.238544  | 0.205084  |
| H  | 5.101671 | 2.984065  | 0.145919  |
| H  | 4.315303 | 2.266792  | 1.573422  |

49

12Pd SCF Done: -1077.11966109 A.U.

|   |          |           |           |
|---|----------|-----------|-----------|
| N | 1.584718 | -0.007019 | 0.127608  |
| C | 2.006853 | 1.452673  | -0.218031 |
| C | 1.602398 | 2.385498  | 0.941883  |
| H | 2.177072 | 2.210568  | 1.847126  |
| H | 1.787921 | 3.412857  | 0.628105  |
| H | 0.540942 | 2.290610  | 1.170485  |
| C | 3.517876 | 1.637593  | -0.435656 |
| H | 3.875937 | 1.144059  | -1.335699 |
| H | 3.725938 | 2.703137  | -0.547681 |
| H | 4.099993 | 1.279994  | 0.414037  |
| C | 2.107445 | -1.153229 | -0.788293 |
| C | 1.982981 | -0.810730 | -2.277727 |
| H | 2.673875 | -0.036473 | -2.598481 |
| H | 2.221226 | -1.706367 | -2.852184 |
| H | 0.965302 | -0.513239 | -2.529376 |
| C | 1.232759 | -2.405632 | -0.573018 |
| H | 0.169412 | -2.150750 | -0.630972 |
| H | 1.456799 | -3.130294 | -1.357264 |
| H | 1.424024 | -2.888386 | 0.379929  |
| C | 3.563202 | -1.576928 | -0.501179 |
| H | 3.816892 | -2.399745 | -1.171884 |
| H | 4.285430 | -0.784209 | -0.670728 |
| H | 3.683996 | -1.944471 | 0.516677  |
| C | 1.246559 | 1.990593  | -1.446322 |
| H | 1.611492 | 1.613976  | -2.393859 |
| H | 0.180793 | 1.751240  | -1.363087 |
| H | 1.349881 | 3.076276  | -1.471090 |
| C | 1.969450 | -0.305644 | 1.516873  |
| C | 1.132377 | 0.059221  | 2.710605  |
| C | 1.315282 | -1.380701 | 2.345106  |
| H | 3.034138 | -0.207353 | 1.701747  |
| H | 0.149799 | 0.471047  | 2.521965  |
| H | 1.646858 | 0.471253  | 3.569376  |

|    |           |           |           |
|----|-----------|-----------|-----------|
| H  | 1.959934  | -2.016158 | 2.938785  |
| H  | 0.439873  | -1.868462 | 1.943225  |
| Pd | -0.816183 | -0.015291 | -0.040633 |
| P  | -3.009333 | 0.008168  | -0.109880 |
| C  | -3.885082 | 1.174699  | 1.016086  |
| H  | -4.969444 | 1.099190  | 0.898472  |
| H  | -3.618747 | 0.949665  | 2.048991  |
| H  | -3.569367 | 2.194839  | 0.796538  |
| C  | -3.893355 | -1.558973 | 0.288329  |
| H  | -4.977074 | -1.431031 | 0.221431  |
| H  | -3.579322 | -2.337744 | -0.407044 |
| H  | -3.629937 | -1.876095 | 1.297613  |
| C  | -3.808750 | 0.437453  | -1.713814 |
| H  | -3.496306 | -0.275896 | -2.476785 |
| H  | -4.898589 | 0.420633  | -1.629417 |
| H  | -3.487315 | 1.431972  | -2.023951 |

48

13Pd SCF Done: -1039.03284967 A.U.

|   |          |           |           |
|---|----------|-----------|-----------|
| N | 1.574986 | 0.101367  | 0.002750  |
| C | 2.039602 | -1.250005 | -0.556500 |
| C | 1.752975 | -1.311923 | -2.071354 |
| H | 2.365682 | -0.639409 | -2.665734 |
| H | 1.961251 | -2.324143 | -2.417607 |
| H | 0.700859 | -1.100650 | -2.273188 |
| C | 3.526468 | -1.569165 | -0.308321 |
| H | 3.722725 | -1.737066 | 0.749329  |
| H | 3.783470 | -2.490940 | -0.833994 |
| H | 4.194574 | -0.787757 | -0.659840 |
| C | 1.910632 | 0.456905  | 1.435739  |
| C | 1.471165 | -0.575729 | 2.476585  |
| H | 2.155700 | -1.420374 | 2.548415  |
| H | 1.460450 | -0.085118 | 3.451605  |
| H | 0.464517 | -0.942732 | 2.275979  |
| C | 3.343273 | 0.919434  | 1.763374  |
| H | 3.387637 | 1.147247  | 2.830689  |
| H | 4.098405 | 0.165426  | 1.557564  |
| H | 3.615031 | 1.828953  | 1.235747  |
| C | 1.218247 | -2.410794 | 0.045934  |
| H | 1.463616 | -2.619934 | 1.080662  |
| H | 0.146365 | -2.196072 | -0.020575 |
| H | 1.423376 | -3.318309 | -0.524259 |
| C | 1.797456 | 1.271045  | -0.940958 |
| C | 3.223426 | 1.563792  | -1.448789 |
| H | 3.152550 | 2.358481  | -2.195097 |
| H | 3.897280 | 1.908875  | -0.669194 |
| H | 3.685096 | 0.710493  | -1.936952 |
| C | 1.184043 | 2.570406  | -0.409127 |
| H | 1.127328 | 3.286228  | -1.230847 |
| H | 0.168324 | 2.400940  | -0.040869 |
| H | 1.778508 | 3.028189  | 0.382472  |
| H | 1.211990 | 1.016711  | -1.820790 |
| H | 1.275901 | 1.320116  | 1.623983  |

|    |           |           |           |
|----|-----------|-----------|-----------|
| Pd | -0.847904 | 0.014303  | 0.012150  |
| P  | -3.037644 | 0.024981  | -0.015559 |
| C  | -3.898767 | 1.215324  | 1.096566  |
| H  | -3.595527 | 2.231458  | 0.843593  |
| H  | -4.984604 | 1.128723  | 1.002808  |
| H  | -3.610284 | 1.019661  | 2.129496  |
| C  | -3.902141 | -1.536898 | 0.441125  |
| H  | -4.987713 | -1.417288 | 0.391736  |
| H  | -3.596226 | -2.331745 | -0.239429 |
| H  | -3.617637 | -1.825337 | 1.453265  |
| C  | -3.869669 | 0.406058  | -1.614875 |
| H  | -4.957557 | 0.382980  | -1.508972 |
| H  | -3.562225 | 1.394449  | -1.956850 |
| H  | -3.565764 | -0.324984 | -2.364326 |

51

14Pd SCF Done: -1078.34760676 A.U.

|   |           |           |           |
|---|-----------|-----------|-----------|
| N | 1.533705  | -0.007592 | 0.086360  |
| C | 1.751365  | -0.551573 | 1.496077  |
| C | 1.133945  | -1.922859 | 1.792845  |
| H | 1.753002  | -2.754093 | 1.458922  |
| H | 1.039929  | -2.009069 | 2.877446  |
| H | 0.135021  | -2.015660 | 1.364297  |
| C | 3.167642  | -0.529928 | 2.106927  |
| H | 3.668187  | 0.427101  | 2.004341  |
| H | 3.065596  | -0.722293 | 3.177739  |
| H | 3.820922  | -1.298423 | 1.702479  |
| C | 1.878362  | 1.512039  | 0.015096  |
| C | 1.511037  | 2.207763  | 1.347155  |
| H | 2.136539  | 1.917904  | 2.187557  |
| H | 1.643592  | 3.280644  | 1.210916  |
| H | 0.463666  | 2.034569  | 1.602772  |
| C | 1.004772  | 2.240398  | -1.035728 |
| H | -0.037193 | 1.906676  | -0.961134 |
| H | 1.031970  | 3.311369  | -0.831069 |
| H | 1.336458  | 2.105593  | -2.057545 |
| C | 3.354353  | 1.849240  | -0.285620 |
| H | 3.463650  | 2.935575  | -0.288916 |
| H | 4.040896  | 1.455961  | 0.458772  |
| H | 3.676789  | 1.494287  | -1.260067 |
| C | 2.031100  | -0.908616 | -1.065788 |
| C | 1.131630  | -2.159722 | -1.201983 |
| H | 1.355449  | -2.647575 | -2.151773 |
| H | 1.285953  | -2.895569 | -0.423324 |
| H | 0.074404  | -1.872798 | -1.204956 |
| C | 3.483254  | -1.402855 | -0.907434 |
| H | 3.785679  | -1.909453 | -1.825944 |
| H | 4.188388  | -0.596654 | -0.724612 |
| H | 3.572738  | -2.127358 | -0.101436 |
| C | 1.905454  | -0.226350 | -2.440855 |
| H | 2.173415  | -0.960852 | -3.200100 |
| H | 0.879768  | 0.085818  | -2.630823 |
| H | 2.569437  | 0.620144  | -2.577110 |

|    |           |           |           |
|----|-----------|-----------|-----------|
| Pd | -0.915824 | -0.029716 | -0.013128 |
| P  | -3.106773 | 0.009692  | 0.020601  |
| C  | -3.944585 | -0.220084 | 1.645875  |
| H  | -3.623176 | 0.563167  | 2.332689  |
| H  | -5.032031 | -0.182210 | 1.538991  |
| H  | -3.657586 | -1.183517 | 2.067668  |
| C  | -3.998667 | -1.247822 | -0.989291 |
| H  | -5.082073 | -1.129866 | -0.901854 |
| H  | -3.708844 | -1.143359 | -2.035068 |
| H  | -3.717240 | -2.246550 | -0.654861 |
| C  | -3.939117 | 1.546858  | -0.562958 |
| H  | -3.651111 | 1.743856  | -1.595839 |
| H  | -5.026927 | 1.455384  | -0.503135 |
| H  | -3.614479 | 2.388873  | 0.048700  |
| H  | 1.159505  | 0.124157  | 2.100704  |

54

15Pd SCF Done: -1117.65437837 A.U.

|   |           |           |           |
|---|-----------|-----------|-----------|
| N | -1.501798 | -0.000118 | -0.000207 |
| C | -1.868632 | -0.816091 | -1.292257 |
| C | -1.636894 | -2.334442 | -1.128332 |
| H | -2.293147 | -2.813190 | -0.412463 |
| H | -1.845636 | -2.795654 | -2.092864 |
| H | -0.600859 | -2.554189 | -0.878003 |
| C | -3.325430 | -0.656366 | -1.779431 |
| H | -3.568783 | 0.357915  | -2.077752 |
| H | -3.462698 | -1.286213 | -2.660671 |
| H | -4.051388 | -0.972055 | -1.035154 |
| C | -1.872212 | 1.526060  | -0.061236 |
| C | -1.640844 | 2.143304  | -1.458137 |
| H | -2.294770 | 1.760408  | -2.231465 |
| H | -1.852876 | 3.208627  | -1.376108 |
| H | -0.603978 | 2.039268  | -1.771996 |
| C | -0.920993 | 2.373989  | 0.830032  |
| H | 0.101646  | 1.981509  | 0.777764  |
| H | -0.901472 | 3.393941  | 0.446622  |
| H | -1.213302 | 2.438772  | 1.869517  |
| C | -3.329821 | 1.864924  | 0.320454  |
| H | -3.469555 | 2.942646  | 0.215008  |
| H | -4.054973 | 1.376331  | -0.324506 |
| H | -3.572240 | 1.616314  | 1.348288  |
| C | -0.914552 | -0.466711 | -2.469736 |
| H | -1.206336 | 0.401157  | -3.045864 |
| H | 0.107310  | -0.314976 | -2.101234 |
| H | -0.892511 | -1.308322 | -3.161785 |
| C | -1.871077 | -0.711273 | 1.351704  |
| C | -0.917815 | -1.905699 | 1.639552  |
| H | -0.896893 | -2.083712 | 2.714558  |
| H | -1.209233 | -2.838736 | 1.176179  |
| H | 0.104387  | -1.663016 | 1.324748  |
| C | -3.327958 | -1.213486 | 1.454577  |
| H | -3.466992 | -1.660617 | 2.440926  |
| H | -4.054412 | -0.411865 | 1.353488  |



|    |           |           |           |
|----|-----------|-----------|-----------|
| H  | -3.569230 | -1.980127 | 0.725825  |
| C  | -1.640912 | 0.190001  | 2.584839  |
| H  | -1.850443 | -0.414686 | 3.466330  |
| H  | -0.604961 | 0.516766  | 2.650912  |
| H  | -2.297347 | 1.049247  | 2.640925  |
| Pd | 0.988055  | 0.001052  | 0.002115  |
| P  | 3.182175  | 0.000443  | 0.000013  |
| C  | 4.034484  | -0.164544 | -1.625694 |
| H  | 3.734442  | 0.657292  | -2.276179 |
| H  | 5.121262  | -0.152634 | -1.506824 |
| H  | 3.734416  | -1.100387 | -2.097722 |
| C  | 4.037235  | -1.324942 | 0.953326  |
| H  | 5.123818  | -1.227783 | 0.880882  |
| H  | 3.739704  | -1.266385 | 2.000539  |
| H  | 3.736541  | -2.299028 | 0.566988  |
| C  | 4.038182  | 1.489082  | 0.669298  |
| H  | 3.739851  | 1.641321  | 1.706785  |
| H  | 5.124720  | 1.378443  | 0.618724  |
| H  | 3.738787  | 2.366605  | 0.095769  |

49

16Pd SCF Done: -1077.17015557 A.U.

|   |           |           |           |
|---|-----------|-----------|-----------|
| N | -1.572465 | 0.012045  | 0.206088  |
| C | -2.162885 | -1.226792 | -0.518852 |
| C | -2.508721 | -0.711847 | -1.941375 |
| C | -1.923048 | 0.683407  | -2.027427 |
| C | -2.026262 | 1.231122  | -0.600961 |
| H | -3.590549 | -0.679565 | -2.076546 |
| H | -2.114336 | -1.379637 | -2.706783 |
| H | -0.869419 | 0.646285  | -2.314471 |
| H | -2.442483 | 1.326532  | -2.738896 |
| C | -1.115003 | -2.339991 | -0.635264 |
| H | -0.801655 | -2.729213 | 0.330117  |
| H | -1.531573 | -3.168264 | -1.214046 |
| H | -0.223710 | -1.969418 | -1.149786 |
| C | -3.438842 | -1.808633 | 0.116307  |
| H | -3.829244 | -2.573227 | -0.557752 |
| H | -3.263794 | -2.286692 | 1.077900  |
| H | -4.217897 | -1.059019 | 0.244416  |
| C | -1.097758 | 2.447482  | -0.488399 |
| H | -1.273604 | 3.091625  | -1.353006 |
| H | -1.263007 | 3.046178  | 0.402459  |
| H | -0.049762 | 2.128291  | -0.503577 |
| C | -3.471077 | 1.673646  | -0.304577 |
| H | -3.601000 | 1.981261  | 0.731855  |
| H | -3.713008 | 2.532647  | -0.932845 |
| H | -4.200829 | 0.895328  | -0.517546 |
| C | -1.864501 | 0.046012  | 1.679716  |
| H | -2.946431 | -0.024981 | 1.830544  |
| C | -1.202091 | -1.121773 | 2.420409  |
| H | -1.421125 | -1.037523 | 3.486101  |
| H | -1.546083 | -2.098086 | 2.095366  |
| H | -0.117582 | -1.080580 | 2.282236  |

|    |           |           |           |
|----|-----------|-----------|-----------|
| C  | -1.394590 | 1.332575  | 2.365323  |
| H  | -1.964694 | 2.209063  | 2.073218  |
| H  | -1.516758 | 1.214384  | 3.442797  |
| H  | -0.337795 | 1.515893  | 2.159928  |
| Pd | 0.847891  | -0.030626 | 0.015623  |
| P  | 3.036671  | -0.014432 | -0.121830 |
| C  | 3.841056  | 1.506762  | -0.782537 |
| H  | 4.929301  | 1.403388  | -0.804003 |
| H  | 3.478005  | 1.698274  | -1.792523 |
| H  | 3.572470  | 2.357806  | -0.156264 |
| C  | 3.993181  | -0.236449 | 1.438122  |
| H  | 3.730062  | -1.192398 | 1.891373  |
| H  | 5.069704  | -0.211144 | 1.248725  |
| H  | 3.732485  | 0.557165  | 2.138633  |
| C  | 3.838401  | -1.293009 | -1.180389 |
| H  | 3.475870  | -1.194626 | -2.203896 |
| H  | 4.926761  | -1.189177 | -1.171726 |
| H  | 3.568717  | -2.284666 | -0.816385 |

52

17Pd SCF Done: -1116.48577685 A.U.

|   |           |           |           |
|---|-----------|-----------|-----------|
| N | 1.574903  | 0.056038  | 0.016943  |
| C | 2.029455  | -0.769704 | -1.212100 |
| C | 2.234393  | -2.199371 | -0.651331 |
| C | 1.574052  | -2.196019 | 0.706567  |
| C | 1.856917  | -0.793260 | 1.258248  |
| H | 3.299457  | -2.414171 | -0.550448 |
| H | 1.821312  | -2.947806 | -1.327109 |
| H | 0.492650  | -2.327746 | 0.614177  |
| H | 1.951245  | -2.970827 | 1.374757  |
| C | 0.924218  | -0.816523 | -2.278459 |
| H | 0.729762  | 0.152821  | -2.729060 |
| H | 1.219514  | -1.501972 | -3.076592 |
| H | -0.015277 | -1.178463 | -1.844251 |
| C | 3.336974  | -0.351807 | -1.903913 |
| H | 3.578967  | -1.120316 | -2.641322 |
| H | 3.257205  | 0.591584  | -2.439864 |
| H | 4.171292  | -0.292755 | -1.207885 |
| C | 0.905769  | -0.570947 | 2.443836  |
| H | 0.954670  | -1.455322 | 3.083325  |
| H | 1.160173  | 0.287226  | 3.058733  |
| H | -0.127932 | -0.460940 | 2.096098  |
| C | 3.301627  | -0.722024 | 1.789762  |
| H | 3.494294  | 0.221297  | 2.297537  |
| H | 3.448970  | -1.517257 | 2.523462  |
| H | 4.046506  | -0.847426 | 1.005901  |
| C | 1.861471  | 1.553234  | 0.035524  |
| C | 1.206104  | 2.208080  | -1.193483 |
| H | 1.317648  | 3.290979  | -1.120920 |
| H | 1.663330  | 1.898495  | -2.129525 |
| H | 0.138318  | 1.972657  | -1.231223 |
| C | 1.198383  | 2.193985  | 1.268167  |
| H | 1.739498  | 1.975932  | 2.185861  |

|    |           |           |           |
|----|-----------|-----------|-----------|
| H  | 1.200774  | 3.277179  | 1.142518  |
| H  | 0.162006  | 1.867329  | 1.374786  |
| C  | 3.344342  | 2.008500  | 0.059540  |
| H  | 3.360623  | 3.082800  | 0.253807  |
| H  | 3.920780  | 1.531557  | 0.844615  |
| H  | 3.855010  | 1.851867  | -0.883983 |
| Pd | -0.999167 | 0.004036  | -0.054628 |
| P  | -3.190950 | -0.014624 | -0.016469 |
| C  | -4.010710 | -0.961220 | 1.335526  |
| H  | -5.099576 | -0.899806 | 1.258080  |
| H  | -3.704661 | -2.006240 | 1.282704  |
| H  | -3.695176 | -0.561087 | 2.299301  |
| C  | -4.069366 | -0.707976 | -1.480667 |
| H  | -5.153894 | -0.662062 | -1.350082 |
| H  | -3.789672 | -0.143518 | -2.370431 |
| H  | -3.768169 | -1.745649 | -1.625556 |
| C  | -4.054942 | 1.604955  | 0.145766  |
| H  | -3.778192 | 2.247924  | -0.689982 |
| H  | -5.140440 | 1.474354  | 0.156381  |
| H  | -3.741526 | 2.091407  | 1.069640  |

40

18Pd SCF Done: -959.193651184 A.U.

|    |           |           |           |
|----|-----------|-----------|-----------|
| N  | 1.847801  | 0.314196  | -0.000739 |
| C  | 2.664990  | -2.554261 | -0.001259 |
| C  | 2.130606  | -1.853835 | 1.244029  |
| C  | 2.408510  | -0.355604 | 1.207193  |
| C  | 2.402710  | -0.356989 | -1.210558 |
| C  | 2.124090  | -1.855120 | -1.244437 |
| H  | 1.974853  | 0.106791  | 2.088750  |
| H  | 1.049428  | -2.008132 | 1.318682  |
| H  | 2.582016  | -2.264155 | 2.150892  |
| H  | 3.759926  | -2.510955 | -0.004216 |
| H  | 2.387385  | -3.610767 | 0.000028  |
| H  | 1.965125  | 0.104625  | -2.090568 |
| H  | 3.490037  | -0.184556 | -1.246322 |
| H  | 1.042496  | -2.009259 | -1.313334 |
| H  | 2.570563  | -2.266538 | -2.153249 |
| H  | 3.495921  | -0.182675 | 1.237768  |
| C  | 2.241955  | 1.767098  | -0.002497 |
| H  | 3.342215  | 1.801209  | -0.005482 |
| C  | 1.746306  | 2.499039  | 1.246280  |
| H  | 2.208555  | 2.138584  | 2.163268  |
| H  | 1.985823  | 3.559403  | 1.157629  |
| H  | 0.662178  | 2.395948  | 1.339226  |
| C  | 1.739582  | 2.497855  | -1.249266 |
| H  | 1.980167  | 3.558195  | -1.163168 |
| H  | 2.196411  | 2.136108  | -2.168457 |
| H  | 0.654916  | 2.395459  | -1.336133 |
| Pd | -0.441756 | 0.083049  | 0.002958  |
| P  | -2.627544 | -0.130455 | 0.000397  |
| C  | -3.351360 | -1.431384 | -1.085369 |
| H  | -2.954229 | -2.405049 | -0.797667 |

|   |           |           |           |
|---|-----------|-----------|-----------|
| H | -4.441651 | -1.449063 | -1.007657 |
| H | -3.067428 | -1.238651 | -2.120115 |
| C | -3.447289 | -0.540823 | 1.598758  |
| H | -3.225309 | 0.236687  | 2.329973  |
| H | -4.530567 | -0.622620 | 1.476715  |
| H | -3.055331 | -1.485941 | 1.975046  |
| C | -3.628285 | 1.327124  | -0.518444 |
| H | -3.353261 | 1.612160  | -1.534135 |
| H | -4.698038 | 1.104543  | -0.483251 |
| H | -3.413780 | 2.167251  | 0.142340  |

52

19Pd SCF Done: -1116.48577685 A.U.

|    |           |           |           |
|----|-----------|-----------|-----------|
| N  | -1.442367 | 0.328781  | -0.003315 |
| C  | -2.538621 | -2.488574 | 0.019083  |
| C  | -1.860429 | -1.903332 | -1.194783 |
| C  | -1.942735 | -0.365785 | -1.314626 |
| C  | -1.950399 | -0.341744 | 1.317390  |
| C  | -1.867572 | -1.881142 | 1.226002  |
| H  | -0.802817 | -2.185298 | -1.172779 |
| H  | -2.277881 | -2.314869 | -2.115694 |
| H  | -3.613047 | -2.288821 | 0.014098  |
| H  | -2.425115 | -3.575640 | 0.029386  |
| H  | -0.809898 | -2.163415 | 1.215365  |
| H  | -2.290344 | -2.275867 | 2.151834  |
| C  | -1.755518 | 1.825627  | -0.017583 |
| H  | -2.842462 | 1.940791  | -0.021202 |
| C  | -1.221852 | 2.576910  | -1.246402 |
| H  | -1.763995 | 2.361204  | -2.158972 |
| H  | -1.333656 | 3.645630  | -1.065502 |
| H  | -0.161749 | 2.370045  | -1.402630 |
| C  | -1.227654 | 2.598670  | 1.200282  |
| H  | -1.337324 | 3.664053  | 0.999467  |
| H  | -1.774916 | 2.400112  | 2.113694  |
| H  | -0.168658 | 2.393877  | 1.366223  |
| Pd | 0.929360  | 0.066533  | 0.003847  |
| P  | 3.111241  | -0.175886 | 0.002647  |
| C  | 3.846729  | -1.297840 | 1.266305  |
| H  | 3.433132  | -2.299327 | 1.145603  |
| H  | 4.934900  | -1.343002 | 1.170895  |
| H  | 3.587494  | -0.939077 | 2.262645  |
| C  | 3.892424  | -0.846758 | -1.525941 |
| H  | 3.661923  | -0.191267 | -2.366085 |
| H  | 4.977363  | -0.925190 | -1.416253 |
| H  | 3.480146  | -1.833145 | -1.739607 |
| C  | 4.141806  | 1.329723  | 0.262317  |
| H  | 3.894225  | 1.776354  | 1.225494  |
| H  | 5.207728  | 1.087490  | 0.240321  |
| H  | 3.922108  | 2.057942  | -0.518659 |
| C  | -3.379068 | 0.020233  | -1.715199 |
| H  | -3.499296 | 1.090659  | -1.867532 |
| H  | -3.615277 | -0.466022 | -2.663346 |
| H  | -4.122668 | -0.300467 | -0.990182 |

|   |           |           |           |
|---|-----------|-----------|-----------|
| C | -3.389032 | 0.051765  | 1.702497  |
| H | -4.128325 | -0.279945 | 0.978031  |
| H | -3.631749 | -0.418778 | 2.656907  |
| H | -3.509157 | 1.124647  | 1.836496  |
| C | -1.020598 | -0.021011 | 2.515188  |
| H | -1.252732 | 0.902247  | 3.031202  |
| H | -1.116441 | -0.823468 | 3.247717  |
| H | 0.024385  | 0.011486  | 2.187636  |
| C | -1.006184 | -0.067003 | -2.512775 |
| H | 0.037451  | -0.032641 | -2.181060 |
| H | -1.101093 | -0.880912 | -3.232713 |
| H | -1.232643 | 0.848500  | -3.044792 |

43

20Pd SCF Done: -998.521498671 A.U.

|    |           |           |           |
|----|-----------|-----------|-----------|
| N  | -1.748779 | -0.033801 | 0.000234  |
| C  | -2.044114 | 2.923203  | -0.001507 |
| C  | -1.652769 | 2.137116  | 1.246806  |
| C  | -2.202711 | 0.714469  | 1.205168  |
| C  | -2.198692 | 0.714081  | -1.206460 |
| C  | -1.646921 | 2.135944  | -1.247238 |
| H  | -1.875126 | 0.179102  | 2.091337  |
| H  | -0.561572 | 2.089556  | 1.325954  |
| H  | -2.026504 | 2.625164  | 2.150729  |
| H  | -3.127653 | 3.087284  | -0.004254 |
| H  | -1.572869 | 3.908812  | -0.000771 |
| H  | -1.869800 | 0.177430  | -2.091390 |
| H  | -3.295253 | 0.762113  | -1.230835 |
| H  | -0.555337 | 2.087378  | -1.321091 |
| H  | -2.015758 | 2.623513  | -2.153423 |
| H  | -3.299417 | 0.760790  | 1.226920  |
| C  | -2.238183 | -1.481566 | -0.000522 |
| C  | -1.692527 | -2.195849 | 1.245361  |
| H  | -2.165173 | -1.851932 | 2.164630  |
| H  | -1.886698 | -3.265667 | 1.161168  |
| H  | -0.613110 | -2.042709 | 1.327591  |
| C  | -1.678307 | -2.198921 | -1.238248 |
| H  | -1.877465 | -3.267992 | -1.156033 |
| H  | -2.136934 | -1.853934 | -2.164179 |
| H  | -0.597321 | -2.049540 | -1.306195 |
| C  | -3.772859 | -1.602330 | -0.009119 |
| H  | -4.216122 | -1.155544 | -0.898936 |
| H  | -4.043689 | -2.659200 | -0.005434 |
| H  | -4.226785 | -1.146642 | 0.870775  |
| Pd | 0.594230  | -0.045683 | 0.001411  |
| P  | 2.788974  | -0.076978 | -0.000087 |
| C  | 3.640179  | -0.319271 | 1.616231  |
| H  | 4.726662  | -0.316853 | 1.494717  |
| H  | 3.353018  | 0.479767  | 2.300023  |
| H  | 3.328760  | -1.269412 | 2.050663  |
| C  | 3.624591  | -1.372443 | -1.009524 |
| H  | 3.326129  | -1.267107 | -2.052755 |
| H  | 4.712292  | -1.291045 | -0.935518 |

|   |          |           |           |
|---|----------|-----------|-----------|
| H | 3.313019 | -2.357953 | -0.662782 |
| C | 3.661006 | 1.427983  | -0.608503 |
| H | 3.370704 | 2.284789  | -0.000112 |
| H | 4.746016 | 1.302767  | -0.561383 |
| H | 3.366098 | 1.625279  | -1.639337 |

45

21Pd SCF Done: -999.713120547 A.U.

|    |           |           |           |
|----|-----------|-----------|-----------|
| N  | 1.782392  | -0.000153 | -0.000291 |
| C  | 2.142233  | -1.346719 | -0.550465 |
| C  | 1.147657  | -1.790511 | -1.625261 |
| H  | 1.204408  | -1.155990 | -2.512002 |
| H  | 1.364137  | -2.815081 | -1.935757 |
| H  | 0.119062  | -1.748120 | -1.246720 |
| C  | 3.567266  | -1.525926 | -1.101786 |
| H  | 4.341766  | -1.252807 | -0.391077 |
| H  | 3.711601  | -2.576979 | -1.359782 |
| H  | 3.715323  | -0.946105 | -2.014240 |
| C  | 2.142444  | 0.196144  | 1.441064  |
| C  | 1.149043  | -0.514931 | 2.362763  |
| H  | 1.207118  | -1.599859 | 2.255151  |
| H  | 1.366192  | -0.272588 | 3.405379  |
| H  | 0.119889  | -0.209129 | 2.138082  |
| C  | 3.568015  | -0.190772 | 1.871113  |
| H  | 3.712955  | 0.111906  | 2.910106  |
| H  | 3.716441  | -1.270867 | 1.825662  |
| H  | 4.341875  | 0.288282  | 1.278485  |
| C  | 2.141799  | 1.150236  | -0.890733 |
| C  | 3.567300  | 1.716486  | -0.771455 |
| H  | 3.711213  | 2.465383  | -1.552839 |
| H  | 3.716087  | 2.216806  | 0.186784  |
| H  | 4.341534  | 0.964254  | -0.890868 |
| C  | 1.148653  | 2.304079  | -0.735316 |
| H  | 1.365475  | 3.085586  | -1.466948 |
| H  | 0.119249  | 1.957249  | -0.886609 |
| H  | 1.207508  | 2.754001  | 0.257828  |
| H  | 2.024716  | 0.765315  | -1.904610 |
| H  | 2.025871  | 1.266749  | 1.614135  |
| H  | 2.026744  | -2.031525 | 0.290591  |
| Pd | -0.779735 | 0.000547  | 0.000299  |
| P  | -2.974240 | -0.000096 | 0.000221  |
| C  | -3.831438 | 1.281003  | 1.010909  |
| H  | -4.917895 | 1.185609  | 0.932923  |
| H  | -3.535285 | 1.176443  | 2.054919  |
| H  | -3.531992 | 2.271891  | 0.668754  |
| C  | -3.831125 | -1.516702 | 0.602819  |
| H  | -4.917588 | -1.402740 | 0.555984  |
| H  | -3.532108 | -2.368332 | -0.008722 |
| H  | -3.534458 | -1.715299 | 1.632897  |
| C  | -3.829628 | 0.234889  | -1.615274 |
| H  | -3.528912 | -0.556387 | -2.302339 |
| H  | -4.916167 | 0.214310  | -1.494673 |
| H  | -3.533413 | 1.191707  | -2.045798 |

39

22Pd SCF Done: -921.081252336 A.U.

|    |           |           |           |
|----|-----------|-----------|-----------|
| N  | 1.789850  | 0.173697  | -0.432037 |
| C  | 2.542986  | -1.070272 | -0.010601 |
| C  | 2.114504  | -2.170728 | -0.990360 |
| H  | 2.424530  | -1.930904 | -2.011013 |
| H  | 2.572954  | -3.120971 | -0.714544 |
| H  | 1.029007  | -2.291197 | -0.979084 |
| C  | 4.064473  | -0.889184 | -0.099510 |
| H  | 4.436566  | -0.175975 | 0.636674  |
| H  | 4.555660  | -1.844318 | 0.092150  |
| H  | 4.365087  | -0.549986 | -1.093299 |
| C  | 2.354281  | 1.513953  | -0.084640 |
| C  | 2.193771  | 1.857557  | 1.392160  |
| H  | 2.497900  | 2.892130  | 1.561641  |
| H  | 1.149791  | 1.745447  | 1.693785  |
| H  | 2.807589  | 1.226466  | 2.032203  |
| C  | 1.674921  | 2.563353  | -0.962644 |
| H  | 2.117230  | 3.544007  | -0.780292 |
| H  | 1.795115  | 2.332124  | -2.023887 |
| H  | 0.605381  | 2.613489  | -0.744674 |
| H  | 3.421026  | 1.528068  | -0.328408 |
| C  | 2.147985  | -1.494974 | 1.408235  |
| H  | 2.461053  | -0.771160 | 2.157345  |
| H  | 1.064595  | -1.610573 | 1.477937  |
| H  | 2.620626  | -2.449408 | 1.648824  |
| H  | 1.795884  | 0.146866  | -1.448960 |
| Pd | -0.462762 | 0.033963  | -0.148096 |
| P  | -2.647480 | -0.103178 | 0.057126  |
| C  | -3.680491 | 0.966076  | -1.031082 |
| H  | -4.745575 | 0.811348  | -0.839518 |
| H  | -3.431498 | 2.012397  | -0.853094 |
| H  | -3.465632 | 0.736305  | -2.074876 |
| C  | -3.428823 | -1.742787 | -0.253989 |
| H  | -3.015792 | -2.477571 | 0.437416  |
| H  | -4.513191 | -1.694733 | -0.123852 |
| H  | -3.202350 | -2.064998 | -1.270548 |
| C  | -3.373985 | 0.301426  | 1.701327  |
| H  | -4.462252 | 0.198813  | 1.687993  |
| H  | -2.958683 | -0.367529 | 2.455329  |
| H  | -3.112447 | 1.324833  | 1.971138  |

36

23Pd SCF Done: -881.751302260 A.U.

|   |           |           |           |
|---|-----------|-----------|-----------|
| N | -1.927127 | -0.008926 | -0.370319 |
| C | -2.524891 | 1.326955  | -0.081167 |
| C | -1.906071 | 2.367497  | -1.008806 |
| H | -2.036107 | 2.090013  | -2.057683 |
| H | -2.385574 | 3.335747  | -0.854637 |
| H | -0.835872 | 2.467973  | -0.813629 |
| C | -2.580416 | -1.173011 | 0.305580  |
| C | -1.982331 | -2.461523 | -0.251150 |
| H | -2.383110 | -3.325420 | 0.280939  |

|    |           |           |           |
|----|-----------|-----------|-----------|
| H  | -2.227486 | -2.574698 | -1.311277 |
| H  | -0.894738 | -2.457327 | -0.150713 |
| C  | -4.105593 | -1.189119 | 0.173822  |
| H  | -4.502060 | -2.103943 | 0.617188  |
| H  | -4.577909 | -0.348119 | 0.681021  |
| H  | -4.403786 | -1.167640 | -0.878078 |
| H  | -2.318888 | -1.102198 | 1.362428  |
| C  | -2.340200 | 1.704550  | 1.383881  |
| H  | -2.840563 | 1.004536  | 2.053977  |
| H  | -1.276878 | 1.720031  | 1.635115  |
| H  | -2.758720 | 2.695856  | 1.565731  |
| H  | -2.033866 | -0.161360 | -1.371967 |
| H  | -3.598026 | 1.292160  | -0.297441 |
| Pd | 0.329208  | -0.040631 | -0.144138 |
| P  | 2.517032  | -0.063712 | 0.075078  |
| C  | 3.314394  | 1.440310  | 0.780118  |
| H  | 2.912987  | 1.629879  | 1.775812  |
| H  | 4.398918  | 1.319341  | 0.845232  |
| H  | 3.085328  | 2.299955  | 0.149997  |
| C  | 3.527317  | -0.288833 | -1.449395 |
| H  | 4.595960  | -0.280874 | -1.219196 |
| H  | 3.267777  | -1.237686 | -1.919323 |
| H  | 3.304982  | 0.513525  | -2.153172 |
| C  | 3.252084  | -1.364597 | 1.153114  |
| H  | 2.982122  | -2.348380 | 0.768646  |
| H  | 4.341208  | -1.278187 | 1.189769  |
| H  | 2.849372  | -1.269367 | 2.161713  |

39

24Pd SCF Done: -1380.66083353 A.U.

|    |           |           |           |
|----|-----------|-----------|-----------|
| N  | -1.645005 | 0.115945  | -0.088236 |
| C  | -2.024975 | 1.279727  | 0.797627  |
| C  | -1.268760 | 2.536455  | 0.371653  |
| H  | -1.701947 | 2.979094  | -0.525188 |
| H  | -1.323490 | 3.270989  | 1.176347  |
| H  | -0.215506 | 2.308392  | 0.179948  |
| C  | -3.515820 | 1.582031  | 0.954100  |
| H  | -4.032223 | 0.842110  | 1.560137  |
| H  | -3.626902 | 2.546143  | 1.451800  |
| H  | -4.008304 | 1.648093  | -0.016328 |
| C  | -2.195990 | -1.272931 | 0.261498  |
| C  | -1.876364 | -1.519505 | 1.743117  |
| H  | -2.489211 | -0.909387 | 2.405721  |
| H  | -2.085635 | -2.565152 | 1.969582  |
| H  | -0.821980 | -1.328476 | 1.952466  |
| C  | -3.698314 | -1.474966 | 0.012593  |
| H  | -3.932725 | -2.525459 | 0.189661  |
| H  | -4.323634 | -0.885306 | 0.675136  |
| H  | -3.966871 | -1.244931 | -1.016969 |
| H  | -1.619583 | 0.973801  | 1.761998  |
| Cl | -2.116579 | 0.523576  | -1.782372 |
| C  | -1.424350 | -2.291031 | -0.588064 |
| H  | -1.647520 | -2.176006 | -1.647759 |



|    |           |           |           |
|----|-----------|-----------|-----------|
| H  | -0.345974 | -2.169177 | -0.446429 |
| H  | -1.707131 | -3.300816 | -0.288432 |
| Pd | 0.740376  | 0.036517  | -0.078881 |
| P  | 2.928691  | -0.027912 | 0.056130  |
| C  | 3.829802  | 1.577280  | 0.003197  |
| H  | 3.497061  | 2.206434  | 0.828907  |
| H  | 4.909904  | 1.425711  | 0.077159  |
| H  | 3.601325  | 2.090019  | -0.931267 |
| C  | 3.664143  | -0.774571 | 1.570473  |
| H  | 3.326225  | -1.806521 | 1.666206  |
| H  | 4.756366  | -0.754816 | 1.527785  |
| H  | 3.328031  | -0.221300 | 2.447521  |
| C  | 3.831371  | -0.961927 | -1.249365 |
| H  | 4.911370  | -0.925209 | -1.084190 |
| H  | 3.501410  | -2.000901 | -1.244819 |
| H  | 3.601703  | -0.534209 | -2.225398 |

36

25Pd SCF Done: -1341.33667328 A.U.

|    |           |           |           |
|----|-----------|-----------|-----------|
| N  | -1.745818 | 0.050920  | -0.086059 |
| C  | -2.251878 | 1.433320  | 0.254337  |
| C  | -1.960371 | 1.743343  | 1.725068  |
| H  | -0.899892 | 1.598554  | 1.941928  |
| H  | -2.208893 | 2.788531  | 1.910452  |
| H  | -2.547414 | 1.138031  | 2.413136  |
| C  | -1.601179 | 2.487008  | -0.636211 |
| H  | -1.806729 | 2.317087  | -1.690653 |
| H  | -1.993758 | 3.468947  | -0.368025 |
| H  | -0.518189 | 2.488761  | -0.489715 |
| C  | -2.296454 | -1.036078 | 0.807487  |
| C  | -3.818389 | -1.067862 | 0.930332  |
| H  | -4.097451 | -1.867849 | 1.617120  |
| H  | -4.229864 | -0.138947 | 1.323072  |
| H  | -4.284534 | -1.274267 | -0.033371 |
| H  | -3.332242 | 1.450723  | 0.090074  |
| Cl | -2.302464 | -0.304426 | -1.778140 |
| C  | -1.737663 | -2.399791 | 0.419687  |
| H  | -2.191413 | -2.772921 | -0.498160 |
| H  | -0.655161 | -2.343628 | 0.280229  |
| H  | -1.949939 | -3.110565 | 1.219639  |
| H  | -1.863800 | -0.774363 | 1.773753  |
| Pd | 0.563382  | -0.030973 | -0.077088 |
| P  | 2.755905  | -0.075467 | 0.057910  |
| C  | 3.498260  | -0.416835 | 1.707935  |
| H  | 3.154934  | -1.387450 | 2.066129  |
| H  | 4.590138  | -0.417025 | 1.655220  |
| H  | 3.172209  | 0.344744  | 2.416472  |
| C  | 3.665344  | 1.455958  | -0.409425 |
| H  | 4.745040  | 1.319914  | -0.305883 |
| H  | 3.432319  | 1.714240  | -1.442567 |
| H  | 3.343086  | 2.277988  | 0.229917  |
| C  | 3.639460  | -1.319327 | -0.973153 |
| H  | 4.721129  | -1.251715 | -0.830588 |

H 3.302247 -2.319926 -0.702158  
H 3.403860 -1.151721 -2.024182

30

26Pd SCF Done: -1722.26232188 A.U.

N -1.671315 -0.306050 0.000154  
C -2.440458 1.034769 -0.000413  
C -1.974329 1.787602 -1.251443  
H -2.329681 1.316793 -2.165619  
H -2.380449 2.798531 -1.209035  
H -0.885176 1.848857 -1.283215  
C -3.955319 0.855298 -0.001781  
H -4.419928 1.841465 -0.001145  
H -4.295041 0.323015 -0.889026  
H -4.296315 0.321297 0.883957  
Cl -2.142208 -1.293242 1.428629  
C -1.976844 1.787560 1.251597  
H -2.335211 1.317521 2.164989  
H -0.887724 1.847533 1.286201  
H -2.381726 2.798921 1.207689  
Cl -2.141816 -1.294320 -1.427830  
Pd 0.627026 -0.166750 -0.000136  
P 2.809793 0.089867 -0.000156  
C 3.577262 0.745150 1.538318  
H 4.661792 0.828458 1.430632  
H 3.160743 1.727502 1.761037  
H 3.347689 0.078775 2.369777  
C 3.521830 1.231980 -1.254388  
H 4.610054 1.282174 -1.165203  
H 3.257676 0.883495 -2.252820  
H 3.102434 2.228607 -1.116654  
C 3.833214 -1.412886 -0.282786  
H 4.898677 -1.169816 -0.262719  
H 3.616830 -2.149731 0.490727  
H 3.580732 -1.846865 -1.250255

42

27Pd SCF Done: -1419.98160849 A.U.

N -1.567730 -0.004481 -0.173265  
C -2.125275 1.332344 0.381533  
C -1.300458 2.457460 -0.267349  
H -1.496333 2.548452 -1.333033  
H -1.559877 3.404744 0.206185  
H -0.230129 2.275999 -0.124965  
C -3.613663 1.594016 0.104313  
H -4.268708 0.946114 0.678664  
H -3.834676 2.622051 0.395025  
H -3.855241 1.490295 -0.951488  
C -2.040771 -1.382941 0.355875  
C -3.560004 -1.567163 0.369881  
H -3.782296 -2.619413 0.553173  
H -4.035590 -0.991570 1.160961  
H -4.003683 -1.292278 -0.586625  
Cl -1.911029 0.022491 -1.956625

|    |           |           |           |
|----|-----------|-----------|-----------|
| C  | -1.411539 | -2.469098 | -0.537280 |
| H  | -1.893869 | -2.540080 | -1.508502 |
| H  | -0.345984 | -2.273505 | -0.684642 |
| H  | -1.519390 | -3.431941 | -0.038371 |
| C  | -1.882626 | 1.404488  | 1.895301  |
| H  | -2.582121 | 0.791574  | 2.457026  |
| H  | -0.861787 | 1.124617  | 2.153897  |
| H  | -2.039405 | 2.437663  | 2.205953  |
| C  | -1.470187 | -1.605914 | 1.768646  |
| H  | -1.979291 | -1.034509 | 2.535476  |
| H  | -1.594767 | -2.660508 | 2.015141  |
| H  | -0.403609 | -1.370692 | 1.794664  |
| Pd | 0.816997  | 0.028201  | -0.088907 |
| P  | 3.006090  | 0.012167  | 0.042342  |
| C  | 3.925442  | 1.231273  | -0.987550 |
| H  | 5.004866  | 1.132836  | -0.845260 |
| H  | 3.685001  | 1.071506  | -2.038717 |
| H  | 3.616986  | 2.240903  | -0.715682 |
| C  | 3.761408  | 0.331037  | 1.691433  |
| H  | 3.415683  | -0.422006 | 2.399778  |
| H  | 4.852864  | 0.301250  | 1.636830  |
| H  | 3.445538  | 1.310320  | 2.051362  |
| C  | 3.873548  | -1.543064 | -0.427135 |
| H  | 4.956828  | -1.435726 | -0.326657 |
| H  | 3.531275  | -2.356026 | 0.213414  |
| H  | 3.630844  | -1.795402 | -1.459519 |

64

28Pd SCF Done: -1348.85887785 A.U.

|   |           |          |           |
|---|-----------|----------|-----------|
| N | 0.890376  | 1.157837 | -0.011806 |
| C | 0.965933  | 2.144686 | 1.185610  |
| C | 0.446513  | 3.490537 | 0.612994  |
| C | -0.064460 | 3.181765 | -0.779805 |
| C | 0.816404  | 2.028005 | -1.271176 |
| H | 1.259653  | 4.216141 | 0.568204  |
| H | -0.014010 | 4.035641 | -1.456727 |
| C | 0.038463  | 1.688995 | 2.318410  |
| H | 0.327739  | 0.730113 | 2.742183  |
| H | 0.052987  | 2.430491 | 3.121176  |
| H | -0.989754 | 1.592671 | 1.952557  |
| C | 2.374108  | 2.383654 | 1.766088  |
| H | 2.297974  | 3.192879 | 2.494648  |
| H | 2.784690  | 1.520833 | 2.286051  |
| H | 3.089404  | 2.696867 | 1.007490  |
| C | 0.099808  | 1.367173 | -2.456582 |
| H | -0.186905 | 2.151234 | -3.161309 |
| H | 0.704801  | 0.646966 | -2.999852 |
| H | -0.812674 | 0.865671 | -2.114345 |
| C | 2.179316  | 2.570713 | -1.742404 |
| H | 2.862200  | 1.775763 | -2.037686 |
| H | 2.022382  | 3.206517 | -2.615391 |
| H | 2.674227  | 3.172820 | -0.983011 |
| C | 2.006046  | 0.143975 | 0.005437  |

|    |           |           |           |
|----|-----------|-----------|-----------|
| H  | 2.944340  | 0.704405  | 0.044536  |
| C  | 2.124902  | -0.772255 | -1.241023 |
| C  | 2.008055  | -0.800231 | 1.242029  |
| H  | 2.116142  | -0.176275 | -2.146295 |
| C  | 1.012911  | -1.828581 | -1.307142 |
| C  | 3.490563  | -1.486263 | -1.182318 |
| H  | 1.889746  | -0.227283 | 2.155454  |
| C  | 0.902279  | -1.861322 | 1.177654  |
| C  | 3.374040  | -1.510825 | 1.304265  |
| H  | 1.130033  | -2.419731 | -2.221119 |
| H  | 0.028533  | -1.349443 | -1.350969 |
| C  | 1.082105  | -2.734765 | -0.069713 |
| H  | 4.299773  | -0.749159 | -1.166503 |
| H  | 3.619177  | -2.083477 | -2.090129 |
| C  | 3.566890  | -2.384773 | 0.057560  |
| H  | -0.087268 | -1.382695 | 1.152169  |
| H  | 0.939123  | -2.474505 | 2.083861  |
| H  | 4.181015  | -0.774687 | 1.377977  |
| H  | 3.417652  | -2.126249 | 2.207851  |
| H  | 0.281860  | -3.478990 | -0.115462 |
| C  | 2.448098  | -3.438563 | -0.011200 |
| H  | 4.541056  | -2.880635 | 0.098554  |
| H  | 2.495575  | -4.092907 | 0.865120  |
| H  | 2.585073  | -4.070591 | -0.894593 |
| Pd | -1.381492 | 0.159180  | 0.060587  |
| P  | -3.397439 | -0.703505 | 0.020059  |
| C  | -4.599915 | -0.216054 | 1.329252  |
| H  | -4.770787 | 0.859649  | 1.280524  |
| H  | -5.552886 | -0.738266 | 1.208029  |
| H  | -4.182841 | -0.451402 | 2.308730  |
| C  | -3.486931 | -2.539574 | 0.160459  |
| H  | -4.521020 | -2.893108 | 0.127852  |
| H  | -2.925682 | -2.990503 | -0.658284 |
| H  | -3.028600 | -2.851775 | 1.099137  |
| C  | -4.430956 | -0.439746 | -1.483133 |
| H  | -3.901160 | -0.821010 | -2.356480 |
| H  | -5.395877 | -0.946705 | -1.396676 |
| H  | -4.597340 | 0.628438  | -1.624486 |
| H  | -0.323914 | 3.918161  | 1.254299  |
| H  | -1.101888 | 2.840252  | -0.743899 |

50

29Pd SCF Done: -1115.25669845 A.U.

|   |          |           |           |
|---|----------|-----------|-----------|
| N | 1.595025 | -0.024692 | 0.000284  |
| C | 1.941665 | 0.813290  | 1.238633  |
| C | 1.920670 | 2.204300  | 0.666126  |
| C | 1.922257 | 2.208552  | -0.650360 |
| C | 1.944633 | 0.821259  | -1.231771 |
| H | 1.937156 | 3.070136  | 1.314000  |
| H | 1.940250 | 3.078530  | -1.292624 |
| C | 0.894510 | 0.729521  | 2.363087  |
| H | 0.949435 | -0.194831 | 2.930885  |
| H | 1.062521 | 1.554720  | 3.059081  |

|    |           |           |           |
|----|-----------|-----------|-----------|
| H  | -0.120153 | 0.824669  | 1.955432  |
| C  | 3.334359  | 0.590362  | 1.867784  |
| H  | 3.516487  | 1.388330  | 2.590715  |
| H  | 3.395035  | -0.353172 | 2.407966  |
| H  | 4.128047  | 0.628755  | 1.124584  |
| C  | 0.900159  | 0.744768  | -2.359212 |
| H  | 1.069871  | 1.574355  | -3.049539 |
| H  | 0.956399  | -0.175981 | -2.932724 |
| H  | -0.115570 | 0.837317  | -1.953518 |
| C  | 3.338809  | 0.602447  | -1.859127 |
| H  | 3.400649  | -0.337419 | -2.405542 |
| H  | 3.522707  | 1.405258  | -2.576225 |
| H  | 4.130753  | 0.635747  | -1.113820 |
| C  | 1.903511  | -1.513784 | -0.004065 |
| C  | 1.252113  | -2.165816 | 1.227964  |
| H  | 1.311668  | -3.250307 | 1.129042  |
| H  | 1.757959  | -1.898394 | 2.153004  |
| H  | 0.198541  | -1.884944 | 1.305371  |
| C  | 1.253811  | -2.157965 | -1.241068 |
| H  | 1.761163  | -1.884970 | -2.163652 |
| H  | 1.312751  | -3.243070 | -1.148820 |
| H  | 0.200427  | -1.876238 | -1.318409 |
| C  | 3.391295  | -1.947898 | -0.004333 |
| H  | 3.418647  | -3.039537 | -0.007141 |
| H  | 3.932087  | -1.614466 | -0.883081 |
| H  | 3.931076  | -1.618996 | 0.876744  |
| Pd | -0.978786 | 0.028565  | -0.002978 |
| P  | -3.170868 | -0.000587 | 0.000129  |
| C  | -4.004824 | -1.636764 | -0.153962 |
| H  | -5.092780 | -1.528534 | -0.140222 |
| H  | -3.701842 | -2.111036 | -1.087614 |
| H  | -3.696664 | -2.279026 | 0.671257  |
| C  | -4.032355 | 0.665611  | 1.486829  |
| H  | -3.748923 | 1.708217  | 1.632234  |
| H  | -5.118281 | 0.598640  | 1.378851  |
| H  | -3.722427 | 0.101374  | 2.366685  |
| C  | -4.040129 | 0.936293  | -1.327727 |
| H  | -5.125542 | 0.851673  | -1.227053 |
| H  | -3.754804 | 1.987167  | -1.274850 |
| H  | -3.737539 | 0.548656  | -2.300740 |

54

33Pd SCF Done: -1117.67266676 A.U.

|   |           |           |           |
|---|-----------|-----------|-----------|
| N | -1.503442 | -0.227596 | 0.025610  |
| C | -1.867838 | -0.359296 | -1.488870 |
| C | -1.487154 | -1.760597 | -2.024994 |
| H | -2.100931 | -2.568008 | -1.633885 |
| H | -1.628622 | -1.751225 | -3.105462 |
| H | -0.435856 | -1.984166 | -1.834909 |
| C | -3.352785 | -0.131246 | -1.846891 |
| H | -3.687771 | 0.881274  | -1.640694 |
| H | -3.475026 | -0.295266 | -2.919193 |
| H | -4.022593 | -0.817508 | -1.336362 |

|    |           |           |           |
|----|-----------|-----------|-----------|
| C  | -2.067639 | 0.991005  | 0.801407  |
| C  | -2.014925 | 2.327832  | 0.003722  |
| H  | -2.528089 | 2.231003  | -0.946100 |
| H  | -2.631272 | 3.022635  | 0.578679  |
| C  | -1.232807 | 1.262032  | 2.073152  |
| H  | -0.161534 | 1.213415  | 1.864870  |
| H  | -1.465431 | 2.265893  | 2.432278  |
| H  | -1.457708 | 0.578324  | 2.882250  |
| C  | -3.527135 | 0.799894  | 1.269247  |
| H  | -3.604575 | 0.013222  | 2.013819  |
| H  | -3.869234 | 1.719653  | 1.746611  |
| H  | -4.212960 | 0.572880  | 0.458442  |
| C  | -1.021071 | 0.599618  | -2.354787 |
| H  | -1.282058 | 1.644545  | -2.251015 |
| H  | 0.041582  | 0.483958  | -2.115906 |
| H  | -1.163621 | 0.338654  | -3.404495 |
| C  | -1.641000 | -1.579728 | 0.727920  |
| C  | -3.023831 | -2.262345 | 0.809027  |
| H  | -2.852829 | -3.325138 | 0.997761  |
| H  | -3.637814 | -1.888008 | 1.624652  |
| H  | -3.601771 | -2.190989 | -0.106082 |
| C  | -0.978100 | -1.710353 | 2.104688  |
| H  | -0.816708 | -2.775580 | 2.284687  |
| H  | -0.004684 | -1.218067 | 2.133657  |
| H  | -1.598204 | -1.340140 | 2.918909  |
| H  | -1.035946 | -2.222207 | 0.102508  |
| C  | -0.644992 | 2.986503  | -0.193166 |
| H  | -0.707990 | 3.762048  | -0.959585 |
| H  | -0.296926 | 3.459653  | 0.725127  |
| H  | 0.124258  | 2.271917  | -0.494519 |
| Pd | 0.946043  | -0.080197 | 0.020224  |
| P  | 3.137227  | -0.091908 | -0.002994 |
| C  | 3.997529  | 1.220422  | 0.963351  |
| H  | 3.712091  | 1.142830  | 2.012629  |
| H  | 5.083518  | 1.128681  | 0.876910  |
| H  | 3.688704  | 2.199661  | 0.596877  |
| C  | 4.002670  | -1.589431 | 0.632505  |
| H  | 3.697456  | -2.458507 | 0.049346  |
| H  | 5.088228  | -1.475732 | 0.569391  |
| H  | 3.718221  | -1.757945 | 1.671326  |
| C  | 3.972465  | 0.101518  | -1.634295 |
| H  | 5.060416  | 0.091782  | -1.526427 |
| H  | 3.668966  | -0.711190 | -2.294559 |
| H  | 3.664083  | 1.043555  | -2.088268 |

60

35Pd SCF Done: -1196.34040233 A.U.

|   |           |           |           |
|---|-----------|-----------|-----------|
| N | -1.255500 | 1.034310  | 0.223781  |
| C | -2.001893 | -0.228224 | -0.356048 |
| C | -1.638743 | -1.437761 | 0.578263  |
| H | -0.622359 | -1.255785 | 0.944641  |
| H | -2.305719 | -1.390109 | 1.439509  |
| C | -3.527227 | -0.044275 | -0.368045 |

|    |           |           |           |
|----|-----------|-----------|-----------|
| H  | -3.836662 | 0.745910  | -1.048938 |
| H  | -4.003903 | -0.964087 | -0.702654 |
| H  | -3.918708 | 0.182126  | 0.623583  |
| C  | -1.487648 | 2.423406  | -0.442178 |
| C  | -1.663821 | 2.385424  | -1.968012 |
| H  | -2.595891 | 1.925968  | -2.285328 |
| H  | -1.685446 | 3.417615  | -2.319015 |
| H  | -0.826384 | 1.892292  | -2.456466 |
| C  | -0.223486 | 3.283823  | -0.233240 |
| H  | 0.645998  | 2.779943  | -0.665648 |
| H  | -0.357754 | 4.241822  | -0.740064 |
| H  | -0.002556 | 3.492458  | 0.805187  |
| C  | -2.702791 | 3.183041  | 0.131579  |
| H  | -2.577614 | 3.455437  | 1.177360  |
| H  | -2.824453 | 4.112883  | -0.425821 |
| H  | -3.627808 | 2.618562  | 0.033536  |
| C  | -1.523928 | -0.548916 | -1.776660 |
| H  | -1.902393 | 0.133557  | -2.522889 |
| H  | -0.432346 | -0.557102 | -1.823262 |
| H  | -1.888495 | -1.530489 | -2.056586 |
| C  | -1.549053 | 1.122033  | 1.697104  |
| C  | -0.663561 | 2.003310  | 2.576244  |
| H  | -0.844380 | 1.716358  | 3.614984  |
| H  | 0.393251  | 1.833035  | 2.358392  |
| H  | -0.872759 | 3.067729  | 2.496309  |
| H  | -1.428014 | 0.128674  | 2.096896  |
| H  | -2.595418 | 1.389498  | 1.864301  |
| C  | -1.641767 | -2.942825 | 0.159487  |
| C  | -1.454589 | -3.708759 | 1.488750  |
| H  | -2.278735 | -3.513789 | 2.178942  |
| H  | -1.414428 | -4.785284 | 1.308478  |
| H  | -0.524595 | -3.415254 | 1.981727  |
| C  | -0.451614 | -3.330695 | -0.739692 |
| H  | -0.565774 | -3.004631 | -1.770370 |
| H  | 0.474474  | -2.896839 | -0.358067 |
| H  | -0.339242 | -4.417702 | -0.754297 |
| C  | -2.961500 | -3.421317 | -0.462695 |
| H  | -3.807924 | -3.191530 | 0.188642  |
| H  | -3.155697 | -2.973785 | -1.437310 |
| H  | -2.934899 | -4.504866 | -0.603390 |
| Pd | 1.039826  | 0.422700  | 0.034859  |
| P  | 3.124317  | -0.244767 | -0.104472 |
| C  | 4.205271  | -0.012277 | 1.370381  |
| H  | 5.216104  | -0.384708 | 1.183542  |
| H  | 4.252852  | 1.047783  | 1.620450  |
| H  | 3.777185  | -0.544790 | 2.219967  |
| C  | 3.424711  | -2.030854 | -0.447180 |
| H  | 2.939937  | -2.307416 | -1.383614 |
| H  | 4.494275  | -2.246392 | -0.516102 |
| H  | 2.988640  | -2.631028 | 0.351719  |
| C  | 4.181456  | 0.518600  | -1.407555 |
| H  | 4.226917  | 1.596532  | -1.250968 |

|   |          |          |           |
|---|----------|----------|-----------|
| H | 5.194559 | 0.108125 | -1.386537 |
| H | 3.739010 | 0.334004 | -2.386747 |

63

36Pd SCF Done: -1235.65765411 A.U.

|   |           |           |           |
|---|-----------|-----------|-----------|
| N | 1.489500  | -0.607043 | 0.033397  |
| C | 1.892579  | 0.509599  | -0.987359 |
| C | 1.920239  | 1.975965  | -0.389383 |
| H | 2.681034  | 2.014691  | 0.391972  |
| H | 2.362278  | 2.537877  | -1.215009 |
| C | 3.321070  | 0.343033  | -1.564392 |
| H | 3.454322  | -0.610459 | -2.064435 |
| H | 3.488908  | 1.117209  | -2.314430 |
| H | 4.097779  | 0.448382  | -0.809838 |
| C | 1.792222  | -2.076226 | -0.339220 |
| C | 1.387468  | -2.401470 | -1.789255 |
| H | 2.040364  | -1.955511 | -2.533021 |
| H | 1.451969  | -3.481668 | -1.920875 |
| H | 0.358482  | -2.103504 | -1.987794 |
| C | 0.923403  | -3.016407 | 0.522844  |
| H | -0.132820 | -2.731034 | 0.468388  |
| H | 1.023961  | -4.032744 | 0.139020  |
| H | 1.225891  | -3.037292 | 1.562975  |
| C | 3.255790  | -2.543818 | -0.140461 |
| H | 3.487299  | -2.702479 | 0.909002  |
| H | 3.379904  | -3.506167 | -0.640656 |
| H | 3.993895  | -1.863850 | -0.550187 |
| C | 0.942257  | 0.523360  | -2.203115 |
| H | 1.191048  | -0.232335 | -2.938618 |
| H | -0.097360 | 0.371813  | -1.898803 |
| H | 1.016678  | 1.486619  | -2.704424 |
| C | 1.869576  | -0.207694 | 1.443694  |
| C | 1.009324  | -0.789350 | 2.574572  |
| H | 1.033020  | -0.082170 | 3.407295  |
| H | -0.032991 | -0.904232 | 2.262860  |
| H | 1.372927  | -1.742158 | 2.954664  |
| H | 1.608595  | 0.832037  | 1.452391  |
| C | 0.736987  | 2.896480  | 0.078292  |
| C | 1.398641  | 4.265991  | 0.348430  |
| H | 1.860105  | 4.671090  | -0.555652 |
| H | 0.654241  | 4.985973  | 0.695716  |
| H | 2.172072  | 4.187610  | 1.116529  |
| C | 0.028435  | 2.469833  | 1.372408  |
| H | -0.467599 | 1.499971  | 1.258490  |
| H | 0.715802  | 2.420723  | 2.219984  |
| H | -0.742573 | 3.203240  | 1.622199  |
| C | -0.336974 | 3.108196  | -1.000961 |
| H | 0.102777  | 3.411305  | -1.953168 |
| H | -0.929775 | 2.209367  | -1.160432 |
| H | -1.018560 | 3.901681  | -0.683641 |
| C | 3.347788  | -0.244920 | 1.877646  |
| H | 3.462066  | 0.438025  | 2.723363  |
| H | 3.666404  | -1.227954 | 2.217345  |



|    |           |           |           |
|----|-----------|-----------|-----------|
| H  | 4.031397  | 0.083365  | 1.100153  |
| Pd | -0.999297 | -0.532735 | 0.027948  |
| P  | -3.182566 | -0.312368 | -0.009935 |
| C  | -4.229886 | -1.521600 | 0.904328  |
| H  | -3.949652 | -1.518606 | 1.957905  |
| H  | -5.291443 | -1.276437 | 0.812623  |
| H  | -4.056751 | -2.522305 | 0.507720  |
| C  | -3.834861 | 1.272157  | 0.667622  |
| H  | -3.402393 | 2.104413  | 0.111935  |
| H  | -4.924881 | 1.317270  | 0.598166  |
| H  | -3.535398 | 1.369090  | 1.711353  |
| C  | -4.015689 | -0.333545 | -1.653414 |
| H  | -3.838889 | -1.294484 | -2.137001 |
| H  | -5.092550 | -0.171906 | -1.555556 |
| H  | -3.590155 | 0.448678  | -2.282509 |

60

37Pd SCF Done: -1271.40626630 A.U.

|   |           |           |           |
|---|-----------|-----------|-----------|
| N | 0.865350  | 1.327082  | -0.035242 |
| C | 0.763082  | 2.058579  | -1.356286 |
| C | -0.476114 | 2.951658  | -1.453137 |
| H | -0.377660 | 3.880995  | -0.889974 |
| H | -0.632441 | 3.221033  | -2.499558 |
| H | -1.364557 | 2.417777  | -1.098487 |
| H | 0.609325  | 1.270512  | -2.089403 |
| C | 2.004773  | 2.856836  | -1.776730 |
| H | 2.919517  | 2.265433  | -1.745457 |
| H | 1.871940  | 3.202965  | -2.803500 |
| H | 2.143766  | 3.739160  | -1.150658 |
| C | 0.956271  | 2.309855  | 1.118457  |
| C | 2.016290  | 0.350438  | -0.050983 |
| H | 2.936445  | 0.941114  | -0.044379 |
| C | 2.112972  | -0.557307 | -1.306130 |
| C | 2.090963  | -0.579084 | 1.188656  |
| H | 2.052895  | 0.038851  | -2.214856 |
| C | 1.021880  | -1.636932 | -1.324019 |
| C | 3.495493  | -1.239649 | -1.294991 |
| H | 1.997539  | 0.006162  | 2.098977  |
| C | 1.006949  | -1.664369 | 1.171488  |
| C | 3.473995  | -1.258917 | 1.197356  |
| H | 1.115286  | -2.232912 | -2.237423 |
| H | 0.026539  | -1.174150 | -1.334878 |
| C | 1.155972  | -2.534377 | -0.084174 |
| H | 4.287760  | -0.484481 | -1.309810 |
| H | 3.605819  | -1.837603 | -2.204631 |
| C | 3.636028  | -2.131849 | -0.055015 |
| H | 0.007916  | -1.207972 | 1.187062  |
| H | 1.095918  | -2.278137 | 2.073638  |
| H | 4.266607  | -0.504776 | 1.236613  |
| H | 3.568331  | -1.870816 | 2.099361  |
| H | 0.370524  | -3.295345 | -0.097948 |
| C | 2.537856  | -3.209175 | -0.078175 |
| H | 4.621124  | -2.607296 | -0.050305 |

|    |           |           |           |
|----|-----------|-----------|-----------|
| H  | 2.633687  | -3.860058 | 0.796759  |
| H  | 2.653572  | -3.840343 | -0.965170 |
| H  | 0.492037  | 3.216073  | 0.738621  |
| C  | 2.366555  | 2.716616  | 1.576850  |
| H  | 2.880633  | 1.920158  | 2.114426  |
| H  | 3.002864  | 3.035475  | 0.754172  |
| H  | 2.269951  | 3.560048  | 2.263189  |
| C  | 0.107371  | 1.894722  | 2.322707  |
| H  | 0.513005  | 1.031798  | 2.848394  |
| H  | 0.053223  | 2.724717  | 3.031800  |
| H  | -0.909658 | 1.643175  | 2.003503  |
| Pd | -1.352389 | 0.293317  | 0.048915  |
| P  | -3.340412 | -0.633710 | -0.013861 |
| C  | -4.401790 | -0.524461 | 1.488956  |
| H  | -4.602804 | 0.523039  | 1.714726  |
| H  | -5.349298 | -1.050538 | 1.344529  |
| H  | -3.873382 | -0.961129 | 2.336747  |
| C  | -4.537911 | -0.077281 | -1.299411 |
| H  | -4.741884 | 0.985655  | -1.167991 |
| H  | -4.100230 | -0.221285 | -2.287515 |
| H  | -5.476187 | -0.635041 | -1.235784 |
| C  | -3.368532 | -2.453903 | -0.304893 |
| H  | -4.390692 | -2.841757 | -0.315455 |
| H  | -2.889925 | -2.673033 | -1.259684 |
| H  | -2.801526 | -2.952333 | 0.481726  |

82

39Pd SCF Done: -1659.8669346 A.U.

|   |           |          |           |
|---|-----------|----------|-----------|
| N | 0.537135  | 0.579582 | 0.202374  |
| C | 0.052191  | 1.978514 | -0.188770 |
| H | 0.952425  | 2.604292 | -0.225018 |
| C | -0.923303 | 2.683654 | 0.792782  |
| C | -0.603975 | 2.073373 | -1.599876 |
| H | -0.545630 | 2.647955 | 1.810745  |
| C | -2.332897 | 2.072792 | 0.752830  |
| C | -1.005135 | 4.172203 | 0.398063  |
| H | 0.003169  | 1.555064 | -2.341440 |
| C | -2.021045 | 1.488162 | -1.643222 |
| C | -0.676170 | 3.561719 | -1.994569 |
| H | -2.963911 | 2.577031 | 1.491505  |
| H | -2.299402 | 1.010830 | 1.019714  |
| C | -2.928690 | 2.225134 | -0.654248 |
| H | -0.011505 | 4.628081 | 0.451138  |
| H | -1.637153 | 4.696606 | 1.121129  |
| C | -1.584325 | 4.317633 | -1.013549 |
| H | -1.997475 | 0.415600 | -1.399859 |
| H | -2.412086 | 1.576164 | -2.662041 |
| H | 0.325116  | 4.004139 | -1.998332 |
| H | -1.068005 | 3.644550 | -3.012587 |
| H | -3.930944 | 1.787664 | -0.676975 |
| C | -2.998774 | 3.712365 | -1.039089 |
| H | -1.628764 | 5.375029 | -1.289873 |
| H | -3.434589 | 3.819068 | -2.037502 |

|    |           |           |           |
|----|-----------|-----------|-----------|
| H  | -3.647596 | 4.254267  | -0.343331 |
| C  | 1.679352  | 0.250376  | -0.746295 |
| H  | 1.413792  | 0.858393  | -1.599782 |
| C  | 1.716363  | -1.176761 | -1.345449 |
| C  | 3.141106  | 0.684611  | -0.448323 |
| H  | 0.682562  | -1.527702 | -1.467082 |
| C  | 2.514432  | -2.194959 | -0.521377 |
| C  | 2.392208  | -1.047663 | -2.727855 |
| H  | 3.150324  | 1.657924  | 0.043441  |
| C  | 3.949833  | -0.338427 | 0.369663  |
| C  | 3.830066  | 0.820342  | -1.827838 |
| H  | 2.515654  | -3.153772 | -1.049552 |
| H  | 2.039629  | -2.374978 | 0.439861  |
| C  | 3.959714  | -1.702595 | -0.339247 |
| H  | 1.820386  | -0.366276 | -3.365287 |
| H  | 2.401345  | -2.021020 | -3.227227 |
| C  | 3.834435  | -0.536946 | -2.554943 |
| H  | 3.556723  | -0.448106 | 1.377021  |
| H  | 4.975432  | 0.028945  | 0.478448  |
| H  | 3.314653  | 1.573100  | -2.431680 |
| H  | 4.858454  | 1.168323  | -1.690857 |
| H  | 4.520472  | -2.421270 | 0.265362  |
| C  | 4.626180  | -1.553575 | -1.716292 |
| H  | 4.303594  | -0.421784 | -3.536423 |
| H  | 5.661814  | -1.219049 | -1.598870 |
| H  | 4.654394  | -2.520853 | -2.227603 |
| C  | 0.734913  | 0.513013  | 1.693580  |
| C  | 0.966024  | -0.885216 | 2.273324  |
| C  | 1.719234  | 1.509073  | 2.342682  |
| H  | -0.250528 | 0.779740  | 2.072077  |
| C  | 0.743880  | -0.866845 | 3.789498  |
| H  | 1.974843  | -1.238177 | 2.072655  |
| H  | 0.271420  | -1.587962 | 1.796661  |
| C  | 1.488560  | 1.547502  | 3.858606  |
| H  | 2.749596  | 1.211234  | 2.157904  |
| H  | 1.604786  | 2.509898  | 1.925700  |
| C  | 1.647479  | 0.157841  | 4.480621  |
| H  | 0.920493  | -1.864931 | 4.198602  |
| H  | -0.304914 | -0.624549 | 3.995471  |
| H  | 2.182922  | 2.252960  | 4.322345  |
| H  | 0.478599  | 1.922373  | 4.062133  |
| H  | 1.432785  | 0.193794  | 5.552079  |
| H  | 2.691526  | -0.160116 | 4.378951  |
| Pd | -1.154643 | -1.157018 | -0.067609 |
| P  | -2.744851 | -2.667061 | -0.153241 |
| C  | -2.594709 | -4.033838 | -1.380810 |
| C  | -3.111522 | -3.637158 | 1.370406  |
| C  | -4.431947 | -2.045618 | -0.560665 |
| H  | -4.734564 | -1.311199 | 0.186154  |
| H  | -4.407888 | -1.551578 | -1.532353 |
| H  | -5.163062 | -2.858143 | -0.586104 |
| H  | -3.375422 | -2.954316 | 2.178271  |

|   |           |           |           |
|---|-----------|-----------|-----------|
| H | -2.220819 | -4.190526 | 1.668849  |
| H | -3.934513 | -4.338319 | 1.207061  |
| H | -1.687626 | -4.603910 | -1.178785 |
| H | -2.516641 | -3.612045 | -2.383157 |
| H | -3.458349 | -4.702978 | -1.337386 |

63

42Pd SCF Done: -1310.72149111 A.U.

|   |           |           |           |
|---|-----------|-----------|-----------|
| N | 0.822097  | 1.260955  | 0.135615  |
| C | 0.800351  | 2.286136  | -1.042862 |
| C | 0.015501  | 3.562524  | -0.677565 |
| H | 0.546859  | 4.211519  | 0.018160  |
| H | -0.137741 | 4.134930  | -1.592783 |
| H | -0.969143 | 3.323580  | -0.271869 |
| C | 2.198561  | 2.743237  | -1.509216 |
| H | 2.792576  | 1.942718  | -1.943748 |
| H | 2.073261  | 3.504158  | -2.281112 |
| H | 2.773953  | 3.192304  | -0.702134 |
| C | 1.999745  | 0.301284  | 0.034452  |
| H | 2.903260  | 0.916049  | 0.071726  |
| C | 2.101545  | -0.542189 | -1.267418 |
| C | 2.127952  | -0.710390 | 1.206778  |
| H | 2.021907  | 0.093725  | -2.140463 |
| C | 1.032948  | -1.642208 | -1.333392 |
| C | 3.496580  | -1.196165 | -1.324973 |
| H | 2.066578  | -0.194529 | 2.156030  |
| C | 1.058789  | -1.809827 | 1.148905  |
| C | 3.522636  | -1.364561 | 1.147416  |
| H | 1.123334  | -2.178378 | -2.283558 |
| H | 0.027279  | -1.203757 | -1.300229 |
| C | 1.205218  | -2.608280 | -0.153577 |
| H | 4.274524  | -0.425984 | -1.305170 |
| H | 3.597711  | -1.728796 | -2.275404 |
| C | 3.678898  | -2.162634 | -0.150627 |
| H | 0.054548  | -1.371667 | 1.196467  |
| H | 1.168819  | -2.468506 | 2.016389  |
| H | 4.301306  | -0.598066 | 1.216476  |
| H | 3.641949  | -2.021134 | 2.014619  |
| H | 0.433698  | -3.382223 | -0.198378 |
| C | 2.598701  | -3.256164 | -0.212867 |
| H | 4.672132  | -2.619069 | -0.192491 |
| H | 2.724875  | -3.953575 | 0.621488  |
| H | 2.705214  | -3.834300 | -1.136393 |
| C | 0.030051  | 1.696701  | -2.242180 |
| H | 0.448838  | 0.778723  | -2.634360 |
| H | -1.004308 | 1.485186  | -1.949852 |
| H | 0.018252  | 2.427107  | -3.054160 |
| C | 0.800483  | 1.965522  | 1.488458  |
| H | 0.170269  | 2.825613  | 1.324876  |
| C | 2.141002  | 2.515200  | 1.998537  |
| H | 2.854287  | 1.734812  | 2.261162  |
| H | 2.616157  | 3.177628  | 1.277626  |
| H | 1.952666  | 3.099218  | 2.901613  |

|    |           |           |           |
|----|-----------|-----------|-----------|
| C  | 0.054679  | 1.218668  | 2.605461  |
| H  | 0.613577  | 0.412954  | 3.073518  |
| H  | -0.192861 | 1.942558  | 3.386010  |
| H  | -0.884134 | 0.803398  | 2.219867  |
| Pd | -1.388181 | 0.221522  | 0.039113  |
| P  | -3.390467 | -0.673474 | -0.019871 |
| C  | -4.469074 | -0.508035 | 1.465482  |
| H  | -5.424315 | -1.020397 | 1.322547  |
| H  | -3.958849 | -0.932525 | 2.330493  |
| H  | -4.653482 | 0.548299  | 1.662619  |
| C  | -3.444770 | -2.500231 | -0.263302 |
| H  | -4.473221 | -2.871018 | -0.276216 |
| H  | -2.959002 | -2.752199 | -1.206312 |
| H  | -2.895703 | -2.987354 | 0.542836  |
| C  | -4.564043 | -0.134151 | -1.334820 |
| H  | -4.114936 | -0.309096 | -2.312836 |
| H  | -5.510646 | -0.677515 | -1.270145 |
| H  | -4.755381 | 0.934420  | -1.233474 |

61

43Pd SCF Done: -1309.50019967 A.U.

|   |           |           |           |
|---|-----------|-----------|-----------|
| N | 0.886181  | 1.285499  | 0.146801  |
| C | 0.786682  | 2.305121  | -1.017512 |
| C | -0.133944 | 3.462816  | -0.592176 |
| H | 0.266597  | 4.026844  | 0.247582  |
| H | -0.242409 | 4.147718  | -1.433676 |
| H | -1.126052 | 3.091673  | -0.331846 |
| C | 2.144234  | 2.897647  | -1.428697 |
| H | 2.854391  | 2.138602  | -1.752797 |
| H | 1.989454  | 3.577719  | -2.267772 |
| H | 2.594522  | 3.473334  | -0.622003 |
| C | 1.004236  | 1.992876  | 1.441905  |
| C | -0.210400 | 1.954981  | 2.319134  |
| C | 2.119903  | 2.588509  | 1.857001  |
| H | -0.469391 | 0.918098  | 2.552447  |
| H | 3.037020  | 2.602300  | 1.288521  |
| C | 2.048362  | 0.305471  | 0.067558  |
| H | 2.961540  | 0.898760  | 0.152902  |
| C | 2.217436  | -0.530345 | -1.222947 |
| C | 2.056126  | -0.690477 | 1.260640  |
| H | 2.209293  | 0.114749  | -2.095460 |
| C | 1.149360  | -1.623120 | -1.364833 |
| C | 3.610132  | -1.193980 | -1.164689 |
| H | 1.890726  | -0.146848 | 2.189412  |
| C | 0.993938  | -1.788924 | 1.115073  |
| C | 3.445349  | -1.353211 | 1.319816  |
| H | 1.305332  | -2.162644 | -2.304321 |
| H | 0.147216  | -1.180191 | -1.404531 |
| C | 1.231600  | -2.587666 | -0.172083 |
| H | 4.388513  | -0.427574 | -1.094917 |
| H | 3.781574  | -1.740134 | -2.097030 |
| C | 3.696626  | -2.150386 | 0.031219  |
| H | -0.014323 | -1.350302 | 1.094297  |

|    |           |           |           |
|----|-----------|-----------|-----------|
| H  | 1.036742  | -2.447680 | 1.988326  |
| H  | 4.222220  | -0.593485 | 1.451908  |
| H  | 3.492944  | -2.016045 | 2.188931  |
| H  | 0.462294  | -3.358479 | -0.272939 |
| C  | 2.622421  | -3.241315 | -0.119397 |
| H  | 4.688736  | -2.609604 | 0.067022  |
| H  | 2.676384  | -3.939455 | 0.721957  |
| H  | 2.803195  | -3.819304 | -1.031431 |
| C  | 0.110394  | 1.666198  | -2.242892 |
| H  | 0.707963  | 0.903997  | -2.729541 |
| H  | -0.845693 | 1.213435  | -1.952049 |
| H  | -0.090909 | 2.445775  | -2.979944 |
| H  | 2.146114  | 3.075259  | 2.822697  |
| H  | -0.036722 | 2.493215  | 3.251913  |
| H  | -1.080772 | 2.385086  | 1.821957  |
| Pd | -1.351772 | 0.170135  | 0.054305  |
| P  | -3.356249 | -0.717632 | -0.016771 |
| C  | -4.576757 | -0.237702 | 1.278087  |
| H  | -5.525530 | -0.764342 | 1.143670  |
| H  | -4.170948 | -0.472968 | 2.262257  |
| H  | -4.752083 | 0.837220  | 1.229120  |
| C  | -4.370622 | -0.456415 | -1.533087 |
| H  | -3.827748 | -0.834606 | -2.399666 |
| H  | -5.334332 | -0.967654 | -1.459660 |
| H  | -4.539668 | 0.611185  | -1.675492 |
| C  | -3.438176 | -2.554159 | 0.119772  |
| H  | -4.470216 | -2.912141 | 0.073953  |
| H  | -2.865220 | -3.001447 | -0.692812 |
| H  | -2.990194 | -2.865810 | 1.063598  |

18

NH3Pd SCF Done: -645.777999369 A.U.

|    |           |           |           |
|----|-----------|-----------|-----------|
| N  | 3.145208  | -0.000266 | -0.000356 |
| H  | 3.518727  | 0.917480  | -0.222017 |
| H  | 3.517746  | -0.651127 | -0.684872 |
| H  | 3.519484  | -0.267656 | 0.904851  |
| Pd | 0.958325  | 0.000309  | 0.000184  |
| P  | -1.244991 | 0.000006  | 0.000088  |
| C  | -2.092242 | -1.627407 | 0.163521  |
| H  | -3.178835 | -1.509346 | 0.151833  |
| H  | -1.791952 | -2.276114 | -0.659648 |
| H  | -1.791901 | -2.100449 | 1.098620  |
| C  | -2.094095 | 0.954968  | 1.326286  |
| H  | -1.792864 | 2.001127  | 1.269069  |
| H  | -3.180409 | 0.886448  | 1.226789  |
| H  | -1.796479 | 0.566029  | 2.300286  |
| C  | -2.093644 | 0.671291  | -1.490276 |
| H  | -3.180041 | 0.621103  | -1.380814 |
| H  | -1.794862 | 1.708861  | -1.640949 |
| H  | -1.793271 | 0.098090  | -2.367621 |

27

NMe3Pd SCF Done: -763.739553540 A.U.

|   |          |           |          |
|---|----------|-----------|----------|
| N | 2.459064 | -0.000830 | 0.000610 |
|---|----------|-----------|----------|

|    |           |           |           |
|----|-----------|-----------|-----------|
| C  | 2.951687  | 1.233027  | -0.640153 |
| H  | 2.585322  | 1.285067  | -1.663911 |
| H  | 4.051269  | 1.257408  | -0.652550 |
| H  | 2.584863  | 2.100338  | -0.094093 |
| C  | 2.950123  | -1.173145 | -0.747848 |
| H  | 2.583747  | -2.085501 | -0.280574 |
| H  | 4.049694  | -1.196798 | -0.763747 |
| H  | 2.582570  | -1.133751 | -1.771709 |
| C  | 2.950749  | -0.063172 | 1.389777  |
| H  | 4.050331  | -0.064364 | 1.417708  |
| H  | 2.583851  | 0.797196  | 1.946693  |
| H  | 2.584052  | -0.970021 | 1.867349  |
| Pd | 0.211874  | 0.001759  | -0.001062 |
| P  | -1.984775 | -0.000193 | 0.000122  |
| C  | -2.835950 | 1.480134  | -0.690251 |
| H  | -3.922200 | 1.369283  | -0.638752 |
| H  | -2.537469 | 2.365066  | -0.127907 |
| H  | -2.537249 | 1.618309  | -1.729536 |
| C  | -2.831627 | -0.143676 | 1.629470  |
| H  | -2.533772 | 0.688670  | 2.267378  |
| H  | -3.918174 | -0.136206 | 1.510395  |
| H  | -2.529126 | -1.071903 | 2.114557  |
| C  | -2.832119 | -1.340870 | -0.936418 |
| H  | -3.918623 | -1.242540 | -0.868143 |
| H  | -2.531872 | -1.297419 | -1.983500 |
| H  | -2.532437 | -2.308861 | -0.534383 |

36

NEt3Pd SCF Done: -881.735113201 A.U.

|    |           |           |           |
|----|-----------|-----------|-----------|
| N  | 2.074441  | 0.001506  | -0.000346 |
| C  | 2.572923  | 1.294840  | -0.546192 |
| H  | 2.194229  | 1.380024  | -1.561693 |
| H  | 3.671210  | 1.256091  | -0.608348 |
| C  | 2.144374  | 2.533180  | 0.230438  |
| H  | 2.634174  | 2.615131  | 1.200340  |
| H  | 2.408548  | 3.420750  | -0.347347 |
| H  | 1.062878  | 2.533094  | 0.384945  |
| C  | 2.576111  | -1.116498 | -0.847367 |
| H  | 2.200800  | -2.039731 | -0.413062 |
| H  | 3.674570  | -1.147457 | -0.783659 |
| C  | 2.145320  | -1.064264 | -2.307496 |
| H  | 2.633822  | -0.265465 | -2.864816 |
| H  | 2.408517  | -2.008670 | -2.787294 |
| H  | 1.063586  | -0.930409 | -2.381984 |
| C  | 2.574372  | -0.172254 | 1.392043  |
| H  | 3.672566  | -0.097569 | 1.389103  |
| H  | 2.194800  | 0.663513  | 1.974486  |
| C  | 2.147580  | -1.465356 | 2.074774  |
| H  | 2.641709  | -2.344705 | 1.662559  |
| H  | 2.407192  | -1.408132 | 3.133393  |
| H  | 1.066716  | -1.602195 | 1.992672  |
| Pd | -0.212339 | -0.004050 | 0.001664  |
| P  | -2.409255 | 0.000243  | -0.000089 |

|   |           |           |           |
|---|-----------|-----------|-----------|
| C | -3.255417 | 1.615260  | -0.265645 |
| H | -4.342266 | 1.498933  | -0.248217 |
| H | -2.955788 | 2.313729  | 0.515913  |
| H | -2.952937 | 2.028729  | -1.227937 |
| C | -3.265595 | -0.573546 | 1.526970  |
| H | -2.964050 | 0.051404  | 2.367800  |
| H | -4.351600 | -0.524407 | 1.412156  |
| H | -2.972792 | -1.601313 | 1.742342  |
| C | -3.262169 | -1.032299 | -1.265460 |
| H | -4.348514 | -0.952279 | -1.173290 |
| H | -2.960662 | -0.707055 | -2.261358 |
| H | -2.966376 | -2.074263 | -1.141872 |

25

PyPd SCF Done: -837.575700508 A.U.

|    |           |           |           |
|----|-----------|-----------|-----------|
| N  | 1.904174  | -0.000468 | 0.003181  |
| C  | 2.597902  | 1.150340  | 0.001266  |
| C  | 3.983683  | 1.194301  | -0.002604 |
| C  | 4.694773  | 0.001303  | -0.004466 |
| C  | 3.985243  | -1.192542 | -0.002287 |
| C  | 2.599328  | -1.150355 | 0.001562  |
| H  | 5.776902  | 0.002010  | -0.007494 |
| H  | 2.013032  | 2.059702  | 0.002851  |
| H  | 4.488346  | 2.150574  | -0.004088 |
| H  | 4.491120  | -2.148173 | -0.003515 |
| H  | 2.015576  | -2.060423 | 0.003369  |
| Pd | -0.252631 | -0.001132 | 0.002985  |
| P  | -2.462189 | 0.000331  | -0.001298 |
| C  | -3.304231 | 1.602632  | -0.337401 |
| H  | -2.999473 | 1.973710  | -1.316066 |
| H  | -4.391010 | 1.488342  | -0.317087 |
| H  | -3.005165 | 2.333434  | 0.414195  |
| C  | -3.304231 | -1.089432 | -1.223098 |
| H  | -3.003893 | -2.123573 | -1.053668 |
| H  | -4.391028 | -1.010729 | -1.137479 |
| H  | -3.000823 | -0.805702 | -2.230979 |
| C  | -3.310735 | -0.510198 | 1.550640  |
| H  | -3.011166 | 0.153068  | 2.362228  |
| H  | -4.396995 | -0.472436 | 1.435708  |
| H  | -3.011154 | -1.525709 | 1.810242  |

44

1PdCl2 SCF Done: -1880.95347780 A.U.

|   |           |           |           |
|---|-----------|-----------|-----------|
| N | -1.902487 | 0.208480  | -0.052029 |
| C | -2.308116 | 1.633532  | -0.291713 |
| C | -2.008125 | 2.235316  | -1.658425 |
| H | -1.815521 | 2.236957  | 0.463633  |
| H | -3.386186 | 1.712345  | -0.129069 |
| H | -2.268762 | 3.294901  | -1.614845 |
| H | -0.953953 | 2.166639  | -1.913356 |
| H | -2.602172 | 1.787197  | -2.454249 |
| C | -2.547806 | -0.656608 | -1.139989 |
| C | -3.035726 | -2.046148 | -0.716813 |
| H | -3.433691 | -0.101445 | -1.463243 |



|    |           |           |           |
|----|-----------|-----------|-----------|
| H  | -3.455248 | -2.523232 | -1.604833 |
| H  | -2.217182 | -2.665269 | -0.360844 |
| H  | -3.820393 | -2.025848 | 0.035369  |
| C  | -2.347023 | -0.191688 | 1.342698  |
| C  | -1.501133 | 0.454093  | 2.439935  |
| H  | -2.155969 | -1.259235 | 1.392702  |
| H  | -1.859025 | 0.098205  | 3.407977  |
| H  | -0.448909 | 0.183312  | 2.351382  |
| H  | -1.575358 | 1.541241  | 2.437578  |
| C  | -3.834275 | 0.063238  | 1.642982  |
| H  | -4.129315 | -0.557367 | 2.490585  |
| H  | -4.016672 | 1.102470  | 1.919024  |
| H  | -4.489501 | -0.181991 | 0.808793  |
| C  | -1.625558 | -0.830565 | -2.352726 |
| H  | -1.110102 | 0.083115  | -2.631828 |
| H  | -0.876710 | -1.594943 | -2.150188 |
| H  | -2.221170 | -1.155052 | -3.208997 |
| Pd | 0.454363  | 0.000566  | 0.011055  |
| P  | 2.714748  | -0.164009 | -0.004655 |
| C  | 3.481298  | 0.544067  | 1.484015  |
| H  | 3.130429  | -0.003019 | 2.358654  |
| H  | 4.567159  | 0.460643  | 1.415202  |
| H  | 3.189005  | 1.587532  | 1.574064  |
| C  | 3.458825  | 0.710745  | -1.415938 |
| H  | 4.545449  | 0.621544  | -1.368912 |
| H  | 3.099572  | 0.262622  | -2.342000 |
| H  | 3.165875  | 1.757028  | -1.388081 |
| C  | 3.433181  | -1.830061 | -0.115482 |
| H  | 4.519867  | -1.738621 | -0.163480 |
| H  | 3.145330  | -2.415178 | 0.754296  |
| H  | 3.063250  | -2.332587 | -1.006753 |
| Cl | 0.272591  | -2.327658 | 0.307525  |
| Cl | 0.851654  | 2.334556  | 0.104572  |

33

2PdCl2 SCF Done: -1761.78490405 A.U.

|   |          |           |           |
|---|----------|-----------|-----------|
| N | 1.816865 | -0.368598 | -0.001353 |
| C | 4.678937 | 0.291371  | 0.002013  |
| C | 3.972641 | -0.226981 | 1.256428  |
| C | 2.485117 | 0.120090  | 1.230727  |
| C | 2.486686 | 0.125842  | -1.230309 |
| C | 3.974263 | -0.221016 | -1.255750 |
| H | 1.964039 | -0.311009 | 2.085663  |
| H | 4.087701 | -1.314420 | 1.321305  |
| H | 4.419739 | 0.194901  | 2.159628  |
| H | 4.662461 | 1.386594  | 0.004612  |
| H | 5.728346 | -0.010992 | 0.001954  |
| H | 1.966729 | -0.301286 | -2.087904 |
| H | 2.341141 | 1.206226  | -1.256787 |
| H | 4.089582 | -1.308101 | -1.325709 |
| H | 4.422470 | 0.205265  | -2.156336 |
| H | 2.339546 | 1.200378  | 1.262016  |
| H | 1.857847 | -1.386320 | -0.003572 |

|    |           |           |           |
|----|-----------|-----------|-----------|
| Pd | -0.341358 | -0.045842 | -0.001382 |
| P  | -2.605064 | 0.142501  | 0.000345  |
| C  | -3.302800 | 1.820101  | -0.001492 |
| H  | -4.392408 | 1.759035  | -0.000050 |
| H  | -2.958822 | 2.358148  | 0.879512  |
| H  | -2.961094 | 2.355379  | -0.885098 |
| C  | -3.362502 | -0.669060 | -1.441017 |
| H  | -3.048098 | -1.710757 | -1.463975 |
| H  | -4.450145 | -0.607610 | -1.376014 |
| H  | -3.024466 | -0.175269 | -2.351513 |
| C  | -3.358102 | -0.664203 | 1.446707  |
| H  | -3.016608 | -0.167947 | 2.354564  |
| H  | -4.445906 | -0.602287 | 1.385259  |
| H  | -3.044290 | -1.706049 | 1.471655  |
| Cl | -0.575142 | -2.397139 | -0.001202 |
| Cl | -0.008554 | 2.281295  | 0.001484  |

45

3PdCl2 SCF Done: -1919.10891763 A.U.

|    |           |           |           |
|----|-----------|-----------|-----------|
| C  | -4.472434 | -0.163298 | 0.007513  |
| C  | -3.694973 | -0.581468 | -1.236202 |
| C  | -2.275309 | 0.018078  | -1.302611 |
| C  | -2.270700 | 0.068103  | 1.301670  |
| C  | -3.690194 | -0.534106 | 1.263235  |
| H  | -3.609576 | -1.673862 | -1.247557 |
| H  | -4.232083 | -0.298229 | -2.144560 |
| H  | -4.678377 | 0.909418  | -0.012482 |
| H  | -5.445215 | -0.660162 | 0.018799  |
| H  | -3.604315 | -1.625211 | 1.315418  |
| H  | -4.224075 | -0.216965 | 2.162229  |
| N  | -1.554284 | -0.260440 | 0.003953  |
| H  | -1.478912 | -1.276932 | 0.023513  |
| C  | -2.317897 | 1.570856  | 1.587826  |
| H  | -2.640786 | 1.715986  | 2.620213  |
| H  | -1.334925 | 2.018443  | 1.463931  |
| H  | -3.017916 | 2.105209  | 0.951964  |
| C  | -1.484033 | -0.608622 | 2.430811  |
| H  | -1.323066 | -1.668241 | 2.227554  |
| H  | -0.509563 | -0.138885 | 2.571848  |
| H  | -2.042826 | -0.518495 | 3.363612  |
| C  | -1.493554 | -0.701584 | -2.408446 |
| H  | -0.521839 | -0.234480 | -2.575357 |
| H  | -1.327497 | -1.751533 | -2.163459 |
| H  | -2.058920 | -0.651123 | -3.340291 |
| C  | -2.321863 | 1.509000  | -1.645214 |
| H  | -3.022964 | 2.066771  | -1.030965 |
| H  | -1.338799 | 1.960663  | -1.536304 |
| H  | -2.642766 | 1.615471  | -2.682893 |
| Pd | 0.706069  | -0.060416 | -0.006785 |
| P  | 2.974644  | 0.006204  | -0.001207 |
| C  | 3.628479  | 0.841852  | 1.475672  |
| H  | 3.229510  | 1.853059  | 1.516068  |
| H  | 3.312279  | 0.297128  | 2.364904  |

|    |          |           |           |
|----|----------|-----------|-----------|
| H  | 4.718562 | 0.868790  | 1.434459  |
| C  | 3.843279 | -1.589878 | -0.033112 |
| H  | 3.560596 | -2.143158 | -0.926408 |
| H  | 4.919312 | -1.407829 | -0.032280 |
| H  | 3.563640 | -2.178625 | 0.837700  |
| C  | 3.667612 | 0.908304  | -1.420443 |
| H  | 3.265989 | 1.918715  | -1.432644 |
| H  | 4.755811 | 0.936657  | -1.341739 |
| H  | 3.384153 | 0.399990  | -2.341616 |
| Cl | 0.816041 | 2.297677  | -0.031889 |
| Cl | 0.678975 | -2.423373 | 0.038636  |

36

4PdCl2 SCF Done: -1801.10364369 A.U.

|    |           |           |           |
|----|-----------|-----------|-----------|
| N  | 1.969212  | 0.055753  | -0.781987 |
| C  | 3.473849  | -0.204715 | 1.752927  |
| C  | 2.822625  | 1.107216  | 1.315128  |
| C  | 2.731201  | 1.196543  | -0.201389 |
| C  | 2.674040  | -1.204685 | -0.417187 |
| C  | 2.770549  | -1.389618 | 1.090867  |
| H  | 2.244863  | 2.118131  | -0.505956 |
| H  | 1.817242  | 1.188739  | 1.735822  |
| H  | 3.392025  | 1.965243  | 1.680044  |
| H  | 4.529208  | -0.199140 | 1.458844  |
| H  | 3.447788  | -0.302522 | 2.840469  |
| H  | 2.142988  | -2.034406 | -0.874362 |
| H  | 3.682393  | -1.163966 | -0.852562 |
| H  | 1.763060  | -1.505280 | 1.496574  |
| H  | 3.304723  | -2.321132 | 1.292325  |
| H  | 3.740550  | 1.182626  | -0.636152 |
| C  | 1.938409  | 0.189097  | -2.252553 |
| H  | 1.396414  | -0.651599 | -2.682717 |
| H  | 1.435344  | 1.116042  | -2.521829 |
| H  | 2.955416  | 0.202810  | -2.662607 |
| Pd | -0.259425 | 0.055361  | -0.210086 |
| P  | -2.466184 | -0.021556 | 0.304800  |
| C  | -3.465361 | -0.771718 | -1.016162 |
| H  | -4.510366 | -0.820726 | -0.705470 |
| H  | -3.382670 | -0.162303 | -1.915606 |
| H  | -3.088143 | -1.770044 | -1.225104 |
| C  | -2.784237 | -1.018365 | 1.792905  |
| H  | -2.278168 | -0.561984 | 2.643289  |
| H  | -3.857489 | -1.055916 | 1.987162  |
| H  | -2.394253 | -2.022099 | 1.642279  |
| C  | -3.305904 | 1.552198  | 0.651190  |
| H  | -3.254691 | 2.197490  | -0.222566 |
| H  | -4.347246 | 1.345455  | 0.904293  |
| H  | -2.814932 | 2.056639  | 1.480586  |
| Cl | -0.299017 | 2.405802  | -0.209820 |
| Cl | -0.401762 | -2.297055 | -0.383431 |

67

11PdCl2 SCF Done: -2419.69575358 A.U.

|   |          |          |          |
|---|----------|----------|----------|
| N | 0.694036 | 0.587559 | 0.819594 |
|---|----------|----------|----------|

|    |           |           |           |
|----|-----------|-----------|-----------|
| C  | 0.747818  | 0.652315  | 2.356598  |
| C  | 1.139320  | -0.666246 | 3.019050  |
| H  | 2.204638  | -0.873269 | 2.922546  |
| H  | 0.909240  | -0.583493 | 4.082582  |
| H  | 0.575699  | -1.509756 | 2.629383  |
| H  | -0.276698 | 0.852700  | 2.647058  |
| C  | 1.652319  | 1.764628  | 2.899309  |
| H  | 1.334024  | 2.764169  | 2.609286  |
| H  | 1.629387  | 1.722026  | 3.989180  |
| H  | 2.686922  | 1.625800  | 2.583241  |
| C  | 2.028728  | 0.192942  | 0.325762  |
| C  | 2.393988  | -1.149635 | 0.351429  |
| C  | 2.995259  | 1.101714  | -0.116878 |
| C  | 3.658228  | -1.585176 | -0.021699 |
| H  | 1.671865  | -1.890259 | 0.654657  |
| C  | 4.256938  | 0.683530  | -0.511104 |
| H  | 2.790551  | 2.158470  | -0.172065 |
| C  | 4.606400  | -0.664052 | -0.462594 |
| H  | 3.876805  | -2.641819 | 0.016978  |
| H  | 4.986524  | 1.402921  | -0.859462 |
| O  | 5.868828  | -0.978611 | -0.865219 |
| C  | 6.264992  | -2.346182 | -0.845543 |
| H  | 7.292149  | -2.365768 | -1.201577 |
| H  | 6.224441  | -2.757875 | 0.166877  |
| H  | 5.639796  | -2.950988 | -1.508191 |
| C  | 0.305979  | 1.965857  | 0.282084  |
| H  | 1.154762  | 2.592344  | 0.543612  |
| C  | -0.896609 | 2.708222  | 0.924759  |
| C  | 0.162972  | 2.082767  | -1.256152 |
| H  | -0.900335 | 2.584837  | 2.005484  |
| C  | -2.271061 | 2.307513  | 0.366920  |
| C  | -0.665223 | 4.204988  | 0.607769  |
| H  | 0.915367  | 1.465871  | -1.745013 |
| C  | -1.226265 | 1.695350  | -1.793186 |
| C  | 0.396875  | 3.572483  | -1.591042 |
| H  | -3.037464 | 2.903619  | 0.872462  |
| H  | -2.488970 | 1.264637  | 0.588031  |
| C  | -2.317831 | 2.550838  | -1.145962 |
| H  | 0.286479  | 4.539092  | 1.032004  |
| H  | -1.451628 | 4.799293  | 1.081592  |
| C  | -0.684812 | 4.434758  | -0.913257 |
| H  | -1.430045 | 0.642176  | -1.613260 |
| H  | -1.225557 | 1.828720  | -2.879505 |
| H  | 1.392270  | 3.887936  | -1.263610 |
| H  | 0.358810  | 3.713917  | -2.674809 |
| H  | -3.295997 | 2.252258  | -1.534684 |
| C  | -2.066641 | 4.034128  | -1.454704 |
| H  | -0.495288 | 5.490832  | -1.125056 |
| H  | -2.111396 | 4.205654  | -2.534758 |
| H  | -2.843047 | 4.654105  | -0.995372 |
| Pd | -0.927577 | -1.047923 | 0.153897  |
| P  | -2.588071 | -2.452279 | -0.474641 |

|    |           |           |           |
|----|-----------|-----------|-----------|
| C  | -2.824890 | -3.852297 | 0.660444  |
| H  | -3.666119 | -4.457883 | 0.319019  |
| H  | -1.920781 | -4.460571 | 0.667483  |
| H  | -3.012759 | -3.477750 | 1.663203  |
| C  | -2.467591 | -3.241276 | -2.106480 |
| H  | -3.354024 | -3.860577 | -2.256247 |
| H  | -2.406611 | -2.480705 | -2.881035 |
| H  | -1.571146 | -3.854836 | -2.155935 |
| C  | -4.176711 | -1.568896 | -0.537212 |
| H  | -4.103167 | -0.760125 | -1.264067 |
| H  | -4.969087 | -2.256367 | -0.837800 |
| H  | -4.392569 | -1.149221 | 0.442149  |
| Cl | 0.197325  | -1.472719 | -1.879137 |
| Cl | -2.160230 | -0.855817 | 2.172116  |

42

18PdCl2 SCF Done: -1879.76284893 A.U.

|    |           |           |           |
|----|-----------|-----------|-----------|
| N  | -1.937266 | -0.019414 | 0.318123  |
| C  | -2.951982 | 0.038218  | -2.502811 |
| C  | -2.406054 | 1.274966  | -1.797766 |
| C  | -2.586980 | 1.184734  | -0.288616 |
| C  | -2.517710 | -1.220323 | -0.359130 |
| C  | -2.339810 | -1.207219 | -1.871529 |
| H  | -2.173767 | 2.071696  | 0.174094  |
| H  | -1.344653 | 1.399343  | -2.022578 |
| H  | -2.911159 | 2.180513  | -2.143142 |
| H  | -4.041826 | 0.005996  | -2.394437 |
| H  | -2.738458 | 0.075298  | -3.573461 |
| H  | -2.045710 | -2.106380 | 0.045234  |
| H  | -3.588628 | -1.259981 | -0.114844 |
| H  | -1.273779 | -1.261127 | -2.104019 |
| H  | -2.796519 | -2.116363 | -2.270668 |
| H  | -3.659131 | 1.141640  | -0.051576 |
| C  | -2.291822 | -0.065967 | 1.791883  |
| H  | -3.388587 | -0.011554 | 1.832217  |
| C  | -1.732508 | 1.119315  | 2.577956  |
| H  | -2.021755 | 2.083382  | 2.168150  |
| H  | -2.111997 | 1.065538  | 3.599457  |
| H  | -0.643721 | 1.085287  | 2.613727  |
| C  | -1.862870 | -1.364139 | 2.475837  |
| H  | -2.115929 | -1.294332 | 3.534553  |
| H  | -2.366117 | -2.243027 | 2.078871  |
| H  | -0.787999 | -1.518406 | 2.388823  |
| Pd | 0.378495  | 0.042433  | 0.052378  |
| P  | 2.636373  | 0.006846  | -0.186669 |
| C  | 3.148491  | -0.816333 | -1.726087 |
| H  | 2.750497  | -0.260545 | -2.574787 |
| H  | 4.237772  | -0.840617 | -1.787905 |
| H  | 2.748338  | -1.827088 | -1.741947 |
| C  | 3.515032  | 1.596862  | -0.236849 |
| H  | 3.334457  | 2.148029  | 0.683189  |
| H  | 4.582569  | 1.400746  | -0.352376 |
| H  | 3.152925  | 2.192830  | -1.071394 |

|    |          |           |           |
|----|----------|-----------|-----------|
| C  | 3.459642 | -0.894771 | 1.161859  |
| H  | 3.070860 | -1.909124 | 1.205510  |
| H  | 4.537207 | -0.909951 | 0.989915  |
| H  | 3.251535 | -0.390915 | 2.105414  |
| Cl | 0.546765 | -2.317176 | -0.021907 |
| Cl | 0.414853 | 2.394139  | 0.115982  |

45

20PdCl2 SCF Done: -1919.08894473 A.U.

|    |           |           |           |
|----|-----------|-----------|-----------|
| N  | -1.856046 | -0.050464 | -0.017903 |
| C  | -2.388261 | 2.887092  | -0.267189 |
| C  | -1.942408 | 2.239524  | 1.039230  |
| C  | -2.386841 | 0.782967  | 1.105290  |
| C  | -2.317453 | 0.577111  | -1.294315 |
| C  | -1.900356 | 2.037559  | -1.435262 |
| H  | -2.071183 | 0.341809  | 2.043732  |
| H  | -0.857406 | 2.299543  | 1.137976  |
| H  | -2.368714 | 2.758520  | 1.901640  |
| H  | -3.481964 | 2.951283  | -0.289940 |
| H  | -2.006968 | 3.907856  | -0.345608 |
| H  | -1.908678 | 0.014445  | -2.123734 |
| H  | -3.410408 | 0.516497  | -1.345113 |
| H  | -0.812117 | 2.092861  | -1.507467 |
| H  | -2.298373 | 2.406893  | -2.383927 |
| H  | -3.480144 | 0.766338  | 1.069637  |
| C  | -2.358244 | -1.507430 | 0.098620  |
| C  | -1.645108 | -2.211071 | 1.258958  |
| H  | -1.756989 | -1.681868 | 2.202136  |
| H  | -2.070790 | -3.208654 | 1.378586  |
| H  | -0.578483 | -2.316327 | 1.063489  |
| C  | -2.045064 | -2.285541 | -1.186907 |
| H  | -2.240382 | -3.342772 | -1.003802 |
| H  | -2.674169 | -1.979575 | -2.022118 |
| H  | -1.003194 | -2.176820 | -1.480325 |
| C  | -3.877972 | -1.586071 | 0.348502  |
| H  | -4.450440 | -1.011289 | -0.379233 |
| H  | -4.187357 | -2.627667 | 0.255751  |
| H  | -4.151525 | -1.253210 | 1.348784  |
| Pd | 0.521141  | -0.030573 | 0.044525  |
| P  | 2.788882  | -0.032674 | 0.009893  |
| C  | 3.668497  | 0.085923  | 1.595969  |
| H  | 4.742135  | 0.070480  | 1.399265  |
| H  | 3.395070  | 1.007975  | 2.103447  |
| H  | 3.394051  | -0.751362 | 2.233497  |
| C  | 3.470908  | -1.541933 | -0.742597 |
| H  | 3.080951  | -1.649551 | -1.751524 |
| H  | 4.560189  | -1.479190 | -0.763802 |
| H  | 3.169862  | -2.404011 | -0.147985 |
| C  | 3.458045  | 1.354036  | -0.958194 |
| H  | 3.152197  | 2.291603  | -0.494764 |
| H  | 4.547645  | 1.296886  | -0.975744 |
| H  | 3.062888  | 1.309384  | -1.970043 |
| Cl | 0.560580  | 0.184352  | 2.389878  |

Cl 0.702740 -0.236903 -2.307328

47

21PdCl2 SCF Done: -1920.27271758 A.U.

|    |           |           |           |
|----|-----------|-----------|-----------|
| N  | 1.840709  | 0.014128  | -0.070789 |
| C  | 2.147663  | 0.582189  | 1.300088  |
| C  | 1.544957  | -0.262890 | 2.421836  |
| H  | 2.040648  | -1.229316 | 2.520290  |
| H  | 1.675175  | 0.271553  | 3.364636  |
| H  | 0.478546  | -0.439612 | 2.277759  |
| C  | 3.624060  | 0.891691  | 1.661170  |
| H  | 4.271415  | 1.012531  | 0.798236  |
| H  | 3.652732  | 1.822681  | 2.230278  |
| H  | 4.057474  | 0.115365  | 2.290142  |
| C  | 2.292307  | 0.916876  | -1.218268 |
| C  | 1.301151  | 0.922883  | -2.393522 |
| H  | 0.460031  | 1.578971  | -2.172889 |
| H  | 1.808766  | 1.311421  | -3.279600 |
| H  | 0.910340  | -0.057310 | -2.640024 |
| C  | 2.564499  | 2.387418  | -0.871418 |
| H  | 2.851852  | 2.887897  | -1.798104 |
| H  | 1.670167  | 2.877164  | -0.496149 |
| H  | 3.373336  | 2.538140  | -0.164457 |
| C  | 2.370759  | -1.397355 | -0.256100 |
| C  | 3.877300  | -1.593390 | -0.015796 |
| H  | 4.136488  | -2.613042 | -0.304783 |
| H  | 4.489370  | -0.921046 | -0.618533 |
| H  | 4.157550  | -1.474254 | 1.025429  |
| C  | 2.030318  | -2.011289 | -1.616105 |
| H  | 2.268398  | -3.074852 | -1.570954 |
| H  | 0.975810  | -1.928219 | -1.856483 |
| H  | 2.623174  | -1.577473 | -2.422855 |
| H  | 1.841255  | -1.986087 | 0.486648  |
| H  | 3.235647  | 0.499711  | -1.577991 |
| H  | 1.614191  | 1.527380  | 1.301378  |
| Pd | -0.622714 | -0.074917 | 0.036073  |
| P  | -2.881545 | 0.006256  | -0.002780 |
| C  | -3.787936 | -1.552403 | -0.227776 |
| H  | -4.853892 | -1.325226 | -0.289297 |
| H  | -3.459362 | -2.041607 | -1.142208 |
| H  | -3.594360 | -2.218509 | 0.608967  |
| C  | -3.484974 | 1.045490  | -1.368351 |
| H  | -4.575774 | 1.070325  | -1.350664 |
| H  | -3.082903 | 2.049813  | -1.264813 |
| H  | -3.148567 | 0.620654  | -2.313752 |
| C  | -3.582356 | 0.709626  | 1.519226  |
| H  | -3.166373 | 1.701391  | 1.679401  |
| H  | -4.668797 | 0.765657  | 1.432233  |
| H  | -3.318262 | 0.069243  | 2.360299  |
| Cl | -0.728164 | -2.419091 | 0.213917  |
| Cl | -0.749925 | 2.277153  | 0.265836  |

41

22PdCl2 SCF Done: -1841.65129599 A.U.

|    |           |           |           |
|----|-----------|-----------|-----------|
| N  | -1.825434 | -0.347194 | 0.261826  |
| C  | -2.655954 | -0.439274 | -1.008180 |
| C  | -2.013600 | -1.541279 | -1.861869 |
| H  | -2.012922 | -2.500723 | -1.341009 |
| H  | -2.571483 | -1.657240 | -2.791526 |
| H  | -0.981182 | -1.292817 | -2.110005 |
| C  | -4.102859 | -0.845484 | -0.690007 |
| H  | -4.643768 | -0.062783 | -0.158607 |
| H  | -4.634642 | -1.036520 | -1.622954 |
| H  | -4.135710 | -1.758739 | -0.091894 |
| C  | -2.457195 | 0.240895  | 1.493266  |
| C  | -2.780283 | 1.724985  | 1.384560  |
| H  | -3.098386 | 2.087946  | 2.363561  |
| H  | -1.903889 | 2.288330  | 1.069497  |
| H  | -3.591021 | 1.922841  | 0.686118  |
| C  | -1.547797 | -0.028186 | 2.691855  |
| H  | -2.076861 | 0.228603  | 3.610909  |
| H  | -1.252927 | -1.077027 | 2.746792  |
| H  | -0.639955 | 0.575941  | 2.641979  |
| H  | -3.389435 | -0.302646 | 1.671230  |
| C  | -2.640442 | 0.863888  | -1.809304 |
| H  | -3.084653 | 1.694166  | -1.267406 |
| H  | -1.624808 | 1.145420  | -2.075684 |
| H  | -3.214847 | 0.717325  | -2.726015 |
| H  | -1.665295 | -1.320173 | 0.516263  |
| Pd | 0.401225  | 0.009562  | 0.021341  |
| P  | 2.663336  | 0.068490  | -0.142150 |
| C  | 3.460361  | -0.362786 | 1.434902  |
| H  | 4.544882  | -0.373934 | 1.314437  |
| H  | 3.186497  | 0.375958  | 2.187680  |
| H  | 3.108391  | -1.341815 | 1.752905  |
| C  | 3.288562  | -1.136733 | -1.352957 |
| H  | 2.906713  | -0.881705 | -2.341188 |
| H  | 4.379585  | -1.115303 | -1.368811 |
| H  | 2.936457  | -2.129302 | -1.081142 |
| C  | 3.447503  | 1.632210  | -0.630298 |
| H  | 4.528573  | 1.488018  | -0.670557 |
| H  | 3.076027  | 1.939320  | -1.605763 |
| H  | 3.199996  | 2.408182  | 0.090448  |
| Cl | 0.268421  | 2.299390  | -0.482385 |
| Cl | 0.616081  | -2.282187 | 0.600426  |

38

23PdCl2 SCF Done: -1802.32638831 A.U.

|   |           |           |           |
|---|-----------|-----------|-----------|
| N | -1.931813 | 0.379666  | -0.104412 |
| C | -2.594622 | 0.584026  | 1.225853  |
| C | -1.828074 | 1.619985  | 2.042655  |
| H | -1.644658 | 2.528740  | 1.468933  |
| H | -2.409057 | 1.880574  | 2.928785  |
| H | -0.862549 | 1.230053  | 2.369990  |
| C | -2.653355 | -0.526387 | -1.053149 |
| C | -1.969111 | -0.468337 | -2.416102 |
| H | -2.474233 | -1.137796 | -3.113145 |



|    |           |           |           |
|----|-----------|-----------|-----------|
| H  | -2.007303 | 0.543157  | -2.829206 |
| H  | -0.924343 | -0.771583 | -2.348956 |
| C  | -4.140793 | -0.192496 | -1.189383 |
| H  | -4.587207 | -0.839152 | -1.946019 |
| H  | -4.693011 | -0.344156 | -0.262900 |
| H  | -4.279940 | 0.844007  | -1.508268 |
| H  | -2.541341 | -1.533671 | -0.654129 |
| C  | -2.756168 | -0.716896 | 2.000269  |
| H  | -3.359240 | -1.448707 | 1.463259  |
| H  | -1.786186 | -1.166777 | 2.206251  |
| H  | -3.255419 | -0.505219 | 2.947177  |
| H  | -1.894517 | 1.298962  | -0.542929 |
| H  | -3.588882 | 0.997095  | 1.030148  |
| Pd | 0.276546  | 0.014841  | -0.033367 |
| P  | 2.537562  | -0.158170 | 0.019867  |
| C  | 3.263345  | 0.969167  | 1.249449  |
| H  | 2.909076  | 0.693895  | 2.242511  |
| H  | 4.352299  | 0.903879  | 1.220487  |
| H  | 2.942845  | 1.984974  | 1.027124  |
| C  | 3.304747  | 0.298108  | -1.564757 |
| H  | 4.391897  | 0.261320  | -1.477357 |
| H  | 2.978463  | -0.399887 | -2.335219 |
| H  | 2.984356  | 1.301968  | -1.835784 |
| C  | 3.250486  | -1.781706 | 0.415014  |
| H  | 2.928764  | -2.511301 | -0.325136 |
| H  | 4.339053  | -1.704642 | 0.415570  |
| H  | 2.899581  | -2.108052 | 1.391876  |
| Cl | 0.539945  | 2.298849  | -0.604002 |
| Cl | -0.006949 | -2.279923 | 0.379039  |

38

25PdCl2 SCF Done: -2261.90040185 A.U.

|    |          |           |           |
|----|----------|-----------|-----------|
| N  | 1.903836 | -0.159625 | -0.004468 |
| C  | 2.402895 | -0.372663 | 1.415526  |
| C  | 2.270631 | 0.902961  | 2.246898  |
| H  | 1.244113 | 1.264879  | 2.248931  |
| H  | 2.555278 | 0.661265  | 3.271626  |
| H  | 2.918630 | 1.707452  | 1.905564  |
| C  | 1.659977 | -1.513111 | 2.103561  |
| H  | 1.623891 | -2.411834 | 1.493973  |
| H  | 2.174315 | -1.746956 | 3.036953  |
| H  | 0.635477 | -1.224729 | 2.342194  |
| C  | 2.531057 | 1.036685  | -0.687900 |
| C  | 4.058106 | 1.070713  | -0.658051 |
| H  | 4.388462 | 1.999400  | -1.125271 |
| H  | 4.464788 | 1.050163  | 0.351600  |
| H  | 4.484943 | 0.240802  | -1.220947 |
| H  | 3.458787 | -0.641561 | 1.341390  |
| Cl | 2.417317 | -1.611959 | -0.932579 |
| C  | 2.007864 | 1.196750  | -2.110234 |
| H  | 2.429863 | 0.448662  | -2.780572 |
| H  | 0.921232 | 1.128515  | -2.143136 |
| H  | 2.293062 | 2.183600  | -2.477173 |

|    |           |           |           |
|----|-----------|-----------|-----------|
| H  | 2.139261  | 1.866848  | -0.104840 |
| Pd | -0.499351 | 0.025991  | -0.034218 |
| P  | -2.752505 | 0.130743  | -0.046186 |
| C  | -3.512863 | 1.769037  | 0.141681  |
| H  | -3.185105 | 2.424313  | -0.661849 |
| H  | -4.597356 | 1.649193  | 0.108771  |
| H  | -3.214688 | 2.209403  | 1.090012  |
| C  | -3.490350 | -0.848987 | 1.294336  |
| H  | -4.577977 | -0.778424 | 1.238450  |
| H  | -3.173676 | -1.884422 | 1.199144  |
| H  | -3.150583 | -0.455169 | 2.251811  |
| C  | -3.460347 | -0.502534 | -1.595137 |
| H  | -4.549280 | -0.451385 | -1.542984 |
| H  | -3.108221 | 0.110096  | -2.424472 |
| H  | -3.137468 | -1.529394 | -1.745380 |
| Cl | -0.363646 | 2.351144  | 0.300135  |
| Cl | -0.813008 | -2.285843 | -0.324013 |

62

35PdCl2 SCF Done: -2116.89794651 A.U.

|   |           |           |           |
|---|-----------|-----------|-----------|
| N | -1.459352 | 0.986858  | 0.317758  |
| C | -2.235775 | -0.195836 | -0.407477 |
| C | -1.935876 | -1.513896 | 0.383831  |
| H | -0.927549 | -1.439054 | 0.781284  |
| H | -2.605593 | -1.529453 | 1.244419  |
| C | -3.759657 | 0.021996  | -0.409835 |
| H | -4.059304 | 0.864905  | -1.026450 |
| H | -4.241274 | -0.862573 | -0.820801 |
| H | -4.157559 | 0.165001  | 0.593776  |
| C | -1.771668 | 2.451452  | -0.140961 |
| C | -1.998548 | 2.639912  | -1.650799 |
| H | -2.931735 | 2.209568  | -2.004916 |
| H | -2.058948 | 3.714729  | -1.830423 |
| H | -1.168671 | 2.259472  | -2.234524 |
| C | -0.553327 | 3.344732  | 0.180405  |
| H | 0.255845  | 3.146441  | -0.516646 |
| H | -0.847152 | 4.390303  | 0.065212  |
| H | -0.171278 | 3.221208  | 1.184211  |
| C | -3.020558 | 3.052716  | 0.552019  |
| H | -2.903421 | 3.188167  | 1.622999  |
| H | -3.194741 | 4.041446  | 0.125925  |
| H | -3.917512 | 2.465002  | 0.379748  |
| C | -1.767057 | -0.366206 | -1.852691 |
| H | -1.985777 | 0.484337  | -2.479217 |
| H | -0.701386 | -0.558473 | -1.911253 |
| H | -2.292040 | -1.213026 | -2.285393 |
| C | -1.741749 | 0.870336  | 1.795148  |
| C | -1.028814 | 1.773477  | 2.800689  |
| H | -1.242327 | 1.362136  | 3.790380  |
| H | 0.050374  | 1.751573  | 2.672401  |
| H | -1.366049 | 2.806559  | 2.801253  |
| H | -1.462454 | -0.129056 | 2.083819  |
| H | -2.817368 | 0.955084  | 1.964782  |

|    |           |           |           |
|----|-----------|-----------|-----------|
| C  | -2.002552 | -2.959416 | -0.207997 |
| C  | -1.846128 | -3.879245 | 1.024207  |
| H  | -2.667627 | -3.737825 | 1.730318  |
| H  | -1.839732 | -4.928711 | 0.721200  |
| H  | -0.911078 | -3.672907 | 1.550062  |
| C  | -0.827264 | -3.283736 | -1.150698 |
| H  | -0.925004 | -2.824643 | -2.130970 |
| H  | 0.117697  | -2.949939 | -0.716160 |
| H  | -0.763281 | -4.364050 | -1.302886 |
| C  | -3.333774 | -3.319059 | -0.882437 |
| H  | -4.176284 | -3.133894 | -0.212263 |
| H  | -3.504939 | -2.761715 | -1.803265 |
| H  | -3.343522 | -4.380966 | -1.141273 |
| Pd | 1.022798  | 0.348580  | 0.038873  |
| P  | 3.156806  | -0.385448 | -0.124622 |
| C  | 4.223254  | 0.263836  | 1.197387  |
| H  | 5.232478  | -0.133181 | 1.075214  |
| H  | 4.251876  | 1.350788  | 1.125711  |
| H  | 3.820257  | -0.021660 | 2.165096  |
| C  | 3.254838  | -2.199068 | -0.030436 |
| H  | 2.702101  | -2.626291 | -0.866663 |
| H  | 4.299387  | -2.508973 | -0.092523 |
| H  | 2.814311  | -2.540098 | 0.902352  |
| C  | 4.085501  | 0.002759  | -1.637470 |
| H  | 4.158519  | 1.079931  | -1.764820 |
| H  | 5.082625  | -0.431475 | -1.541972 |
| H  | 3.577988  | -0.414668 | -2.503570 |
| Cl | 1.119524  | -0.715653 | 2.158512  |
| Cl | 1.244580  | 1.322505  | -2.094666 |

77

38PdCl2 SCF Done: -2463.63539802 A.U.

|   |           |           |           |
|---|-----------|-----------|-----------|
| N | 0.756256  | 0.284105  | 0.710886  |
| C | 0.788006  | 0.176600  | 2.227771  |
| C | 0.826821  | -1.249329 | 2.767215  |
| H | 1.841507  | -1.585653 | 2.960506  |
| H | 0.292535  | -1.265300 | 3.717746  |
| H | 0.333252  | -1.957669 | 2.105222  |
| H | -0.185415 | 0.549641  | 2.511572  |
| C | 1.797738  | 1.055708  | 2.991277  |
| H | 1.522967  | 2.109288  | 2.982975  |
| H | 1.790595  | 0.735436  | 4.034862  |
| H | 2.819044  | 0.971311  | 2.632237  |
| C | 0.779563  | 1.794911  | 0.398151  |
| H | 1.664622  | 2.146571  | 0.923640  |
| C | -0.404453 | 2.618512  | 0.977454  |
| C | 1.000771  | 2.291378  | -1.058488 |
| H | -0.673239 | 2.262389  | 1.968651  |
| C | -1.659989 | 2.593520  | 0.091025  |
| C | 0.075883  | 4.080840  | 1.092922  |
| H | 1.783271  | 1.721949  | -1.550584 |
| C | -0.260530 | 2.279321  | -1.933598 |
| C | 1.495018  | 3.752482  | -0.944530 |

|    |           |           |           |
|----|-----------|-----------|-----------|
| H  | -2.444867 | 3.181102  | 0.577343  |
| H  | -2.046629 | 1.576614  | 0.002685  |
| C  | -1.348037 | 3.154758  | -1.299733 |
| H  | 0.951021  | 4.143085  | 1.746705  |
| H  | -0.711143 | 4.684287  | 1.554627  |
| C  | 0.413485  | 4.632674  | -0.300351 |
| H  | -0.624275 | 1.265368  | -2.071689 |
| H  | 0.000185  | 2.661765  | -2.926047 |
| H  | 2.418666  | 3.794973  | -0.359168 |
| H  | 1.733330  | 4.125669  | -1.944842 |
| H  | -2.250097 | 3.125454  | -1.918050 |
| C  | -0.849891 | 4.603075  | -1.176238 |
| H  | 0.779360  | 5.659639  | -0.211314 |
| H  | -0.628584 | 5.010695  | -2.167744 |
| H  | -1.627434 | 5.233380  | -0.732975 |
| C  | 1.852189  | -0.389999 | -0.121145 |
| H  | 1.520103  | -0.082810 | -1.104248 |
| C  | 1.932210  | -1.941410 | -0.291490 |
| C  | 3.319330  | 0.118507  | 0.012541  |
| H  | 0.930235  | -2.364499 | -0.286917 |
| C  | 2.836015  | -2.726009 | 0.677769  |
| C  | 2.558951  | -2.141621 | -1.699497 |
| H  | 3.337396  | 1.179488  | 0.261181  |
| C  | 4.166165  | -0.658149 | 1.041193  |
| C  | 3.969725  | -0.075225 | -1.376410 |
| H  | 2.862423  | -3.767271 | 0.340366  |
| H  | 2.444844  | -2.748407 | 1.687033  |
| C  | 4.254609  | -2.145271 | 0.672240  |
| H  | 1.936507  | -1.665451 | -2.456516 |
| H  | 2.585641  | -3.210374 | -1.932172 |
| C  | 3.988699  | -1.569129 | -1.740084 |
| H  | 3.755513  | -0.567631 | 2.045254  |
| H  | 5.167872  | -0.217836 | 1.071797  |
| H  | 3.422745  | 0.491710  | -2.134183 |
| H  | 4.991565  | 0.316343  | -1.362466 |
| H  | 4.869818  | -2.666292 | 1.411595  |
| C  | 4.869180  | -2.309265 | -0.723668 |
| H  | 4.398754  | -1.692774 | -2.746713 |
| H  | 5.887148  | -1.906786 | -0.742109 |
| H  | 4.935288  | -3.371019 | -0.980765 |
| Pd | -1.418737 | -0.744248 | 0.085766  |
| P  | -3.453212 | -1.637088 | -0.370213 |
| C  | -3.897421 | -2.989286 | 0.762447  |
| H  | -3.879886 | -2.628328 | 1.787013  |
| H  | -4.891282 | -3.362433 | 0.509424  |
| H  | -3.171042 | -3.794224 | 0.652440  |
| C  | -4.775016 | -0.394517 | -0.240403 |
| H  | -4.588478 | 0.394730  | -0.968415 |
| H  | -5.738391 | -0.861626 | -0.451300 |
| H  | -4.773129 | 0.032854  | 0.758738  |
| C  | -3.723996 | -2.368298 | -2.012206 |
| H  | -4.745754 | -2.750821 | -2.051187 |

|    |           |           |           |
|----|-----------|-----------|-----------|
| H  | -3.577569 | -1.615795 | -2.782912 |
| H  | -3.017068 | -3.177316 | -2.180479 |
| Cl | -2.398987 | -0.311501 | 2.211353  |
| Cl | -0.757824 | -1.246094 | -2.112180 |

84

39PdCl2 SCF Done: -2580.41989982 A.U.

|   |           |           |           |
|---|-----------|-----------|-----------|
| N | 0.717571  | 0.298020  | 0.312127  |
| C | 0.639294  | 1.811651  | 0.007292  |
| H | 1.613601  | 2.175936  | 0.321919  |
| C | -0.393313 | 2.621771  | 0.841149  |
| C | 0.526570  | 2.321850  | -1.459047 |
| H | -0.438753 | 2.257020  | 1.863523  |
| C | -1.813021 | 2.604129  | 0.251562  |
| C | 0.102935  | 4.083487  | 0.868544  |
| H | 1.176478  | 1.756487  | -2.121270 |
| C | -0.897057 | 2.332268  | -2.035954 |
| C | 1.039799  | 3.781884  | -1.437879 |
| H | -2.472120 | 3.179537  | 0.909188  |
| H | -2.205803 | 1.586573  | 0.232504  |
| C | -1.814461 | 3.194022  | -1.162580 |
| H | 1.098515  | 4.139406  | 1.318867  |
| H | -0.564761 | 4.680011  | 1.497103  |
| C | 0.130846  | 4.653891  | -0.557088 |
| H | -1.289849 | 1.324142  | -2.117392 |
| H | -0.854829 | 2.736727  | -3.052802 |
| H | 2.070441  | 3.816212  | -1.071851 |
| H | 1.050889  | 4.169969  | -2.460531 |
| H | -2.830911 | 3.175097  | -1.566931 |
| C | -1.296027 | 4.640006  | -1.129353 |
| H | 0.512789  | 5.678669  | -0.536814 |
| H | -1.300438 | 5.063304  | -2.138782 |
| H | -1.951755 | 5.263739  | -0.513463 |
| C | 1.724146  | -0.316915 | -0.669889 |
| H | 1.276797  | 0.028946  | -1.590521 |
| C | 1.808492  | -1.855315 | -0.942482 |
| C | 3.186042  | 0.220236  | -0.681843 |
| H | 0.822037  | -2.300373 | -0.837961 |
| C | 2.842447  | -2.683738 | -0.157644 |
| C | 2.255166  | -1.947764 | -2.429622 |
| H | 3.216426  | 1.262588  | -0.364956 |
| C | 4.169740  | -0.598917 | 0.178372  |
| C | 3.659959  | 0.132632  | -2.150581 |
| H | 2.851344  | -3.692192 | -0.583918 |
| H | 2.577284  | -2.808758 | 0.885605  |
| C | 4.236468  | -2.058617 | -0.293373 |
| H | 1.533843  | -1.440051 | -3.069092 |
| H | 2.271780  | -2.997790 | -2.736305 |
| C | 3.657933  | -1.335435 | -2.610599 |
| H | 3.893159  | -0.575372 | 1.230412  |
| H | 5.160280  | -0.138459 | 0.107182  |
| H | 3.012775  | 0.734360  | -2.793766 |
| H | 4.669320  | 0.546497  | -2.238343 |

|    |           |           |           |
|----|-----------|-----------|-----------|
| H  | 4.950578  | -2.607876 | 0.327022  |
| C  | 4.673756  | -2.114911 | -1.763270 |
| H  | 3.939442  | -1.385313 | -3.666552 |
| H  | 5.673140  | -1.683604 | -1.880633 |
| H  | 4.727989  | -3.155541 | -2.097753 |
| C  | 0.967732  | 0.174058  | 1.808340  |
| C  | 1.164865  | -1.257890 | 2.291486  |
| C  | 2.035004  | 1.077114  | 2.467795  |
| H  | 0.024851  | 0.488838  | 2.238463  |
| C  | 1.005720  | -1.349330 | 3.811618  |
| H  | 2.169934  | -1.587037 | 2.049627  |
| H  | 0.464780  | -1.927736 | 1.791576  |
| C  | 1.908671  | 0.990817  | 3.996580  |
| H  | 3.042026  | 0.788278  | 2.171019  |
| H  | 1.915025  | 2.120248  | 2.185994  |
| C  | 2.018006  | -0.443274 | 4.513332  |
| H  | 1.137985  | -2.386744 | 4.130600  |
| H  | -0.010932 | -1.057060 | 4.087846  |
| H  | 2.672070  | 1.622929  | 4.457860  |
| H  | 0.938542  | 1.405502  | 4.293416  |
| H  | 1.871698  | -0.468246 | 5.596556  |
| H  | 3.030360  | -0.818370 | 4.322336  |
| Pd | -1.471842 | -0.781582 | -0.061479 |
| Cl | -1.090646 | -1.165138 | -2.350703 |
| Cl | -2.175880 | -0.499147 | 2.192320  |
| P  | -3.538833 | -1.683875 | -0.307300 |
| C  | -4.018688 | -2.308775 | -1.945470 |
| C  | -3.821265 | -3.115078 | 0.779339  |
| C  | -4.845730 | -0.477376 | 0.074005  |
| H  | -4.728671 | -0.126305 | 1.095646  |
| H  | -4.753547 | 0.367755  | -0.607808 |
| H  | -5.823279 | -0.944088 | -0.057840 |
| H  | -3.673938 | -2.821266 | 1.814937  |
| H  | -3.108507 | -3.898623 | 0.523165  |
| H  | -4.836207 | -3.488156 | 0.632032  |
| H  | -3.337558 | -3.096187 | -2.259026 |
| H  | -3.977811 | -1.505242 | -2.676614 |
| H  | -5.035534 | -2.699676 | -1.874761 |

69

40PdCl2 SCF Done: -2308.74858042 A.U.

|   |           |           |          |
|---|-----------|-----------|----------|
| N | 1.035092  | -0.447967 | 0.727518 |
| C | 1.038917  | -0.640070 | 2.240849 |
| C | 0.178307  | -1.801289 | 2.753743 |
| H | 0.725063  | -2.741006 | 2.787606 |
| H | -0.132795 | -1.563475 | 3.771966 |
| H | -0.724754 | -1.943268 | 2.166262 |
| H | 0.550787  | 0.257628  | 2.597509 |
| C | 2.403141  | -0.710882 | 2.946873 |
| H | 3.096197  | 0.074103  | 2.650890 |
| H | 2.222478  | -0.592758 | 4.017365 |
| H | 2.891879  | -1.673057 | 2.805984 |
| C | 1.746596  | 0.879387  | 0.418957 |

|    |           |           |           |
|----|-----------|-----------|-----------|
| H  | 2.695865  | 0.787712  | 0.942392  |
| C  | 1.103551  | 2.176277  | 0.983598  |
| C  | 2.150151  | 1.180138  | -1.053660 |
| H  | 0.708003  | 2.005488  | 1.982226  |
| C  | -0.014483 | 2.758752  | 0.102506  |
| C  | 2.236291  | 3.223235  | 1.068032  |
| H  | 2.540055  | 0.292374  | -1.543271 |
| C  | 1.020320  | 1.764073  | -1.915295 |
| C  | 3.291432  | 2.219866  | -0.978543 |
| H  | -0.401108 | 3.663253  | 0.582307  |
| H  | -0.851994 | 2.065692  | 0.033208  |
| C  | 0.511211  | 3.072733  | -1.300008 |
| H  | 3.038679  | 2.862230  | 1.718461  |
| H  | 1.847782  | 4.141240  | 1.518505  |
| C  | 2.782115  | 3.520690  | -0.338597 |
| H  | 0.205355  | 1.050240  | -2.017404 |
| H  | 1.410321  | 1.945201  | -2.922201 |
| H  | 4.132630  | 1.817213  | -0.405850 |
| H  | 3.660216  | 2.421499  | -1.988482 |
| H  | -0.299337 | 3.476846  | -1.913797 |
| C  | 1.653745  | 4.095915  | -1.210222 |
| H  | 3.601697  | 4.241686  | -0.269377 |
| H  | 2.033840  | 4.327166  | -2.210349 |
| H  | 1.286331  | 5.032359  | -0.778671 |
| C  | 1.698827  | -1.553108 | -0.071894 |
| C  | 3.236753  | -1.682147 | 0.021558  |
| C  | 1.105099  | -2.956118 | 0.107666  |
| H  | 1.469967  | -1.280719 | -1.097893 |
| C  | 3.740748  | -2.563851 | -1.128394 |
| H  | 3.523021  | -2.145690 | 0.965529  |
| H  | 3.738154  | -0.717052 | -0.016743 |
| C  | 1.576802  | -3.863325 | -1.034943 |
| H  | 1.434495  | -3.392004 | 1.051197  |
| H  | 0.018491  | -2.917547 | 0.121106  |
| C  | 3.103406  | -3.954346 | -1.087111 |
| H  | 4.829937  | -2.643548 | -1.080589 |
| H  | 3.503042  | -2.080900 | -2.083057 |
| H  | 1.143526  | -4.859623 | -0.912947 |
| H  | 1.195444  | -3.465523 | -1.979880 |
| H  | 3.421592  | -4.544882 | -1.950441 |
| H  | 3.461777  | -4.481445 | -0.195224 |
| Pd | -1.300811 | -0.331512 | 0.102203  |
| P  | -3.494852 | -0.091055 | -0.423880 |
| C  | -4.604869 | -0.939097 | 0.740711  |
| H  | -5.641790 | -0.756743 | 0.453196  |
| H  | -4.403424 | -2.009525 | 0.706581  |
| H  | -4.422671 | -0.572330 | 1.747270  |
| C  | -3.986845 | 1.660356  | -0.416770 |
| H  | -3.396216 | 2.196308  | -1.159428 |
| H  | -5.045793 | 1.744748  | -0.666481 |
| H  | -3.794912 | 2.084550  | 0.565424  |
| C  | -4.060505 | -0.681912 | -2.046671 |

|    |           |           |           |
|----|-----------|-----------|-----------|
| H  | -5.130180 | -0.481064 | -2.130280 |
| H  | -3.520647 | -0.167535 | -2.837966 |
| H  | -3.873424 | -1.749094 | -2.138907 |
| Cl | -1.954317 | 0.672462  | 2.167612  |
| Cl | -0.939646 | -1.330654 | -1.999130 |

20

NH3PdCl2 SCF Done: -1566.35089704 A.U.

|    |           |           |           |
|----|-----------|-----------|-----------|
| N  | -2.846957 | 0.253904  | -0.007569 |
| H  | -3.121681 | 1.092957  | 0.493038  |
| H  | -3.289685 | -0.553477 | 0.419422  |
| H  | -3.189220 | 0.331932  | -0.960236 |
| Pd | -0.691022 | 0.030020  | -0.004246 |
| P  | 1.568662  | -0.119930 | -0.002193 |
| C  | 2.280423  | -1.790655 | -0.024622 |
| H  | 3.369366  | -1.719734 | -0.020890 |
| H  | 1.940028  | -2.343046 | 0.848870  |
| H  | 1.944773  | -2.317642 | -0.915620 |
| C  | 2.315120  | 0.718576  | -1.432739 |
| H  | 1.982816  | 1.754762  | -1.446291 |
| H  | 3.403369  | 0.674742  | -1.364650 |
| H  | 1.988153  | 0.227795  | -2.348904 |
| C  | 2.304444  | 0.676209  | 1.457567  |
| H  | 3.393070  | 0.627453  | 1.399998  |
| H  | 1.977938  | 1.713772  | 1.494166  |
| H  | 1.964479  | 0.164104  | 2.357192  |
| Cl | -0.494818 | 2.377100  | 0.009677  |
| Cl | -1.009742 | -2.296965 | 0.009373  |

29

NMe3PdCl2 SCF Done: -1684.31190788 A.U.

|    |           |           |           |
|----|-----------|-----------|-----------|
| N  | 2.446985  | 0.034848  | -0.001652 |
| C  | 2.875820  | 0.789424  | 1.196559  |
| H  | 2.429849  | 1.779363  | 1.186113  |
| H  | 3.968201  | 0.881967  | 1.216179  |
| H  | 2.549598  | 0.260352  | 2.090647  |
| C  | 2.866476  | 0.754207  | -1.224552 |
| H  | 2.537274  | 0.197149  | -2.100405 |
| H  | 3.958404  | 0.850155  | -1.253570 |
| H  | 2.416805  | 1.742637  | -1.241104 |
| C  | 3.104627  | -1.287760 | 0.016172  |
| H  | 4.193353  | -1.160694 | 0.013616  |
| H  | 2.805325  | -1.836119 | 0.904859  |
| H  | 2.803985  | -1.861232 | -0.855870 |
| Pd | 0.169979  | -0.058798 | -0.002114 |
| P  | -2.097603 | 0.002135  | -0.001617 |
| C  | -2.749784 | 0.840417  | 1.474744  |
| H  | -3.839552 | 0.873223  | 1.428860  |
| H  | -2.440602 | 0.292090  | 2.364148  |
| H  | -2.345293 | 1.849137  | 1.518693  |
| C  | -2.991950 | -1.578857 | -0.043342 |
| H  | -2.729892 | -2.174548 | 0.827971  |
| H  | -4.063916 | -1.373802 | -0.048992 |
| H  | -2.714606 | -2.135545 | -0.935842 |



|    |           |           |           |
|----|-----------|-----------|-----------|
| C  | -2.771004 | 0.918038  | -1.421714 |
| H  | -3.859560 | 0.953868  | -1.350867 |
| H  | -2.361776 | 1.925406  | -1.425402 |
| H  | -2.484328 | 0.412345  | -2.343288 |
| Cl | 0.142126  | -2.405147 | 0.004767  |
| Cl | 0.074799  | 2.307511  | 0.004063  |

38

NEt3PdCl2 SCF Done: -1802.29796307 A.U.

|    |           |           |           |
|----|-----------|-----------|-----------|
| N  | 2.136826  | 0.092431  | -0.004762 |
| C  | 2.528010  | 1.147805  | 0.976702  |
| H  | 2.065503  | 2.076497  | 0.662947  |
| H  | 3.617095  | 1.278250  | 0.920003  |
| C  | 2.114849  | 0.860307  | 2.412553  |
| H  | 2.631343  | 0.000848  | 2.838412  |
| H  | 2.354278  | 1.730147  | 3.026551  |
| H  | 1.039649  | 0.688968  | 2.480464  |
| C  | 2.640699  | 0.465606  | -1.363885 |
| H  | 2.328168  | -0.323447 | -2.043179 |
| H  | 3.738241  | 0.448624  | -1.328898 |
| C  | 2.187456  | 1.797807  | -1.940269 |
| H  | 2.517701  | 2.651013  | -1.349678 |
| H  | 2.627938  | 1.894304  | -2.934914 |
| H  | 1.105775  | 1.851962  | -2.035324 |
| C  | 2.815595  | -1.185174 | 0.414600  |
| H  | 3.805166  | -0.916047 | 0.803991  |
| H  | 2.239843  | -1.599488 | 1.236202  |
| C  | 2.999491  | -2.252621 | -0.657342 |
| H  | 3.778796  | -1.992653 | -1.373258 |
| H  | 3.303782  | -3.175953 | -0.160754 |
| H  | 2.075693  | -2.457917 | -1.191119 |
| Pd | -0.202310 | -0.062883 | 0.006159  |
| P  | -2.470468 | -0.087186 | -0.083271 |
| C  | -3.235412 | 0.630465  | 1.401952  |
| H  | -4.321472 | 0.625510  | 1.295424  |
| H  | -2.953872 | 0.033982  | 2.269296  |
| H  | -2.874722 | 1.647505  | 1.534851  |
| C  | -3.304537 | -1.692234 | -0.265074 |
| H  | -3.087012 | -2.323016 | 0.593124  |
| H  | -4.379323 | -1.515841 | -0.338806 |
| H  | -2.948731 | -2.195163 | -1.161708 |
| C  | -3.106585 | 0.874621  | -1.490982 |
| H  | -4.197397 | 0.844990  | -1.488602 |
| H  | -2.757330 | 1.901050  | -1.415874 |
| H  | -2.735683 | 0.436913  | -2.417438 |
| Cl | -0.204029 | -2.404986 | 0.172728  |
| Cl | -0.466873 | 2.291036  | 0.159498  |

27

PyPdCl2 SCF Done: -1758.14783499 A.U.

|   |          |           |           |
|---|----------|-----------|-----------|
| N | 1.969114 | -0.002291 | 0.002310  |
| C | 2.629150 | -0.944548 | 0.689954  |
| C | 4.013181 | -1.008172 | 0.718229  |
| C | 4.744202 | -0.072934 | -0.002013 |

|    |           |           |           |
|----|-----------|-----------|-----------|
| C  | 4.059268  | 0.898214  | -0.719988 |
| C  | 2.673780  | 0.905211  | -0.687412 |
| H  | 5.825935  | -0.100396 | -0.003699 |
| H  | 2.022944  | -1.666961 | 1.216329  |
| H  | 4.499805  | -1.782882 | 1.294067  |
| H  | 4.582917  | 1.647204  | -1.297366 |
| H  | 2.102619  | 1.657420  | -1.211119 |
| Pd | -0.207974 | 0.041487  | 0.007681  |
| P  | -2.474271 | -0.003960 | 0.001097  |
| C  | -3.145222 | -1.103804 | 1.284189  |
| H  | -2.854598 | -0.729853 | 2.265442  |
| H  | -4.233706 | -1.133443 | 1.213920  |
| H  | -2.733240 | -2.101045 | 1.146468  |
| C  | -3.339223 | 1.571568  | 0.262134  |
| H  | -3.049221 | 2.281237  | -0.509518 |
| H  | -4.415945 | 1.397358  | 0.225834  |
| H  | -3.061870 | 1.984455  | 1.229872  |
| C  | -3.134885 | -0.630839 | -1.572757 |
| H  | -2.721047 | -1.619416 | -1.760598 |
| H  | -4.223943 | -0.681955 | -1.524924 |
| H  | -2.837848 | 0.039400  | -2.378847 |
| Cl | -0.148881 | 2.371683  | 0.304603  |
| Cl | -0.263310 | -2.295934 | -0.312004 |

15

PMe3Au SCF Done: -1057.32503158 A.U.

|    |           |           |           |
|----|-----------|-----------|-----------|
| Au | 0.553526  | -0.000156 | -0.000281 |
| P  | -1.713755 | 0.000223  | 0.000001  |
| C  | -2.449548 | 1.564510  | -0.568427 |
| H  | -3.538406 | 1.499005  | -0.544460 |
| H  | -2.118651 | 2.375075  | 0.079676  |
| H  | -2.118445 | 1.771384  | -1.585325 |
| C  | -2.450599 | -1.274731 | -1.069378 |
| H  | -2.119739 | -2.258562 | -0.739018 |
| H  | -3.539568 | -1.221066 | -1.024049 |
| H  | -2.120210 | -1.120205 | -2.095790 |
| C  | -2.449538 | -0.289165 | 1.638996  |
| H  | -3.538396 | -0.276400 | 1.570138  |
| H  | -2.119201 | -1.255935 | 2.016889  |
| H  | -2.118161 | 0.488014  | 2.326616  |
| Cl | 2.906274  | 0.000235  | 0.000612  |

14

PMe3Pd SCF Done: -589.154108576 A.U.

|    |           |           |           |
|----|-----------|-----------|-----------|
| Pd | 1.311172  | -0.000014 | 0.000065  |
| P  | -0.858343 | -0.000050 | 0.000082  |
| C  | -1.702419 | 1.185985  | -1.126985 |
| H  | -2.788837 | 1.097614  | -1.042374 |
| H  | -1.402711 | 2.202931  | -0.874225 |
| H  | -1.403358 | 0.984893  | -2.155602 |
| C  | -1.702762 | -1.568876 | -0.463691 |
| H  | -1.403142 | -2.359675 | 0.223894  |
| H  | -2.789122 | -1.451353 | -0.428369 |
| H  | -1.403962 | -1.857710 | -1.471265 |

|   |           |           |          |
|---|-----------|-----------|----------|
| C | -1.703166 | 0.383018  | 1.590282 |
| H | -2.789501 | 0.353656  | 1.470834 |
| H | -1.403597 | -0.344184 | 2.344824 |
| H | -1.404450 | 1.374481  | 1.930441 |

16

PMe3PdCl2 SCF Done: -1509.72399417 A.U.

|    |           |           |           |
|----|-----------|-----------|-----------|
| Pd | 0.465694  | -0.741999 | -0.000078 |
| P  | -0.684541 | 1.136089  | -0.000012 |
| C  | 0.318588  | 2.642429  | -0.000294 |
| H  | -0.352262 | 3.503499  | -0.000120 |
| H  | 0.951998  | 2.659687  | 0.883572  |
| H  | 0.951480  | 2.659665  | -0.884534 |
| C  | -1.761421 | 1.251966  | -1.451289 |
| H  | -2.430348 | 0.394451  | -1.467558 |
| H  | -2.335961 | 2.178375  | -1.388936 |
| H  | -1.155479 | 1.256149  | -2.355981 |
| C  | -1.760713 | 1.252012  | 1.451789  |
| H  | -2.335088 | 2.178555  | 1.389891  |
| H  | -2.429799 | 0.394623  | 1.468242  |
| H  | -1.154322 | 1.255906  | 2.356182  |
| Cl | -1.487065 | -1.999934 | 0.000051  |
| Cl | 2.566904  | 0.219419  | 0.000053  |

8

CH3COOH SCF Done: -229.198361583 A.U.

|   |           |           |           |
|---|-----------|-----------|-----------|
| H | -1.736060 | -0.809982 | 0.000859  |
| O | -0.790216 | -1.030289 | -0.000123 |
| C | -0.089229 | 0.124347  | -0.000118 |
| O | -0.624418 | 1.206811  | -0.000021 |
| C | 1.389786  | -0.125017 | -0.000182 |
| H | 1.662468  | -0.720509 | -0.872415 |
| H | 1.922986  | 0.820830  | -0.011792 |
| H | 1.664336  | -0.698489 | 0.886299  |

7

CH3COO SCF Done: -228.714509669 A.U.

|   |           |           |           |
|---|-----------|-----------|-----------|
| O | 0.709128  | 1.147272  | 0.001129  |
| C | 0.194662  | -0.000013 | -0.006117 |
| O | 0.804510  | -1.098584 | 0.001183  |
| C | -1.348318 | -0.045583 | -0.002562 |
| H | -1.747069 | 0.647498  | -0.746048 |
| H | -1.728598 | -1.048999 | -0.194639 |
| H | -1.711501 | 0.285573  | 0.974262  |

13

PMe3 SCF Done: -461.188336333 A.U.

|   |           |           |           |
|---|-----------|-----------|-----------|
| P | -0.000012 | 0.000043  | -0.596499 |
| C | 0.209971  | -1.617222 | 0.275551  |
| H | 0.194099  | -1.496407 | 1.361967  |
| H | -0.592124 | -2.296973 | -0.016643 |
| H | 1.159343  | -2.069273 | -0.016316 |
| C | 1.295708  | 0.990392  | 0.275586  |
| H | 1.211854  | 2.038805  | -0.015302 |
| H | 1.200010  | 0.915214  | 1.362034  |
| H | 2.285376  | 0.636392  | -0.017692 |

|   |           |          |           |
|---|-----------|----------|-----------|
| C | -1.505662 | 0.626762 | 0.275594  |
| H | -1.393230 | 0.580396 | 1.362039  |
| H | -1.693498 | 1.661170 | -0.016817 |
| H | -2.371745 | 0.030450 | -0.016174 |
